# Supplementary material for: Overexpression of Myocilin in the Drosophila Eye Activates the Unfolded Protein Response: Implications for Glaucoma
Source: PLoS One. 2009 Jan 16;4(1):e4216. doi: 10.1371/journal.pone.0004216 (PMC2615221; doi:10.1371/journal.pone.0004216)
Supplement: Table S2 — ANOVA of differences in transcript abundance in MYOC expressing F1 transgenic flies in the presence or absence of the gmr-GAL4 driver. (15.90 MB XLS) [file pone.0004216.s002.xls]

## Sheet: TwoWayANOVA_FDR_0.001
Affymetrix ID	Two-Way ANOVA Term	FDR<0.001	Drosophila Gene TITLE	Drosophila Gene SYMBOL	Gene Count	Human Homolog
1640978_at	Construct	5.45296e-06	CG14567	CG14567	1
1641370_s_at	Construct	1.27582e-05	CG4199	CG4199	1	apoptosis-inducing factor like
1633771_s_at	Construct	1.65352e-05	CG2017	CG2017	1	GTP binding protein 2
1626461_at	Construct	1.89965e-05	sodium chloride cotransporter 69	Ncc69	1	solute carrier family 12 sodium potassium chloride
1630749_at	Construct	3.04883e-05	CG11052	CG11052	1
1641326_at	Construct	3.062e-05	CG30118	CG30118	1
1629869_s_at	Construct	3.13106e-05	Fatty acid (long chain) transport protein	Fatp	1	solute carrier family 27 fatty acid transporter
1634184_a_at	Construct	3.18783e-05	junctophilin	jp	1	junctophilin 2
1623573_s_at	Construct	3.44056e-05	CG11266	CG11266	1	RNA binding motif protein 39
1640059_at	Construct	3.96248e-05	CG6040	CG6040	1
1629066_at	Construct	4.19068e-05	GRHRII	GRHRII	1
1634054_at	Construct	4.65188e-05	neither inactivation nor afterpotential C	ninaC	1
1626740_at	Construct	4.79039e-05	CG4784	CG4784	1
1630922_at	Construct	4.85809e-05	CG11538	CG11538	1
1623807_a_at	Construct	4.99875e-05	milton	milt	1
1635358_at	Construct	5.63581e-05	CG2116	CG2116	1
1631569_s_at	Construct	5.85311e-05	Gp150	Gp150	1
1635711_s_at	Construct	6.05701e-05	Ankyrin	Ank	1	ankyrin 3 node of Ranvier ankyrin G
1636418_s_at	Construct	6.11422e-05	Host cell factor	Hcf	1	host cell factor C1 VP16-accessory protein
1629309_at	Construct	6.47204e-05	CG7627	CG7627	1	ATP-binding cassette sub-family C CFTR MRP membrane
1635981_a_at	Construct	6.56057e-05	CG14648	CG14648	1
1623475_s_at	Construct	6.75233e-05	Rm62	Rm62	1
1624877_at	Construct	6.839e-05	CG1561	CG1561	1
1641347_s_at	Construct	7.35604e-05	visgun	vsg	1
1624705_a_at	Construct	7.90344e-05	failed axon connections	fax	1	chromosome 6 open reading frame 168
1628399_s_at	Construct	8.00372e-05	B52	B52	1	splicing factor arginine serine-rich 6
1624989_s_at	Construct	8.61257e-05	Elongation factor 1100E	Ef1100E	1	eukaryotic translation elongation factor 1 alpha 2
1624083_s_at	Construct	8.63172e-05	Minute (2) 21AB	M(2)21AB	1	methionine adenosyltransferase II alpha
1627059_at	Construct	8.71552e-05	uninitiated	und	1	methionyl aminopeptidase 2
1636101_a_at	Construct	8.8871e-05	CG31729	CG31729	1	ATPase Class II type 9B
1624164_s_at	Construct	9.41806e-05	GlcAT-P	GlcAT-P	1
1627916_s_at	Construct	9.41806e-05	raspberry	ras	1	IMP inosine monophosphate dehydrogenase 2
1639375_a_at	Construct	9.41806e-05	CG2182	CG2182	1	zinc finger protein 403
1639666_at	Construct	9.6768e-05	S1P	S1P	1	membrane-bound transcription factor peptidase sit
1624119_at	Construct	9.91712e-05	CG32486	CG32486	1
1641026_a_at	Construct	9.9654e-05	---	---	1
1634044_at	Construct	0.000101055	big brain	bib	1
1637957_s_at	Construct	0.00010268	RNA-binding protein 9	Rbp9	1	ELAV embryonic lethal abnormal vision Drosophil
1623722_at	Construct	0.000103002	nonA-like	nonA-l	1
1634757_a_at	Construct	0.000105794	Ornithine decarboxylase antizyme	Oda	1
1633745_a_at	Construct	0.000106067	short stop	shot	1
1625197_at	Construct	0.000106558	eukaryotic initiation factor 5C /// eIF-5C	eIF-5C /// DyakeIF-5C	1	basic leucine zipper and W2 domains 1
1641047_at	Construct	0.000106652	CG16974	CG16974	1
1631308_at	Construct	0.000108844	CG10737	CG10737	1
1633798_at	Construct	0.00010892	ypsilon schachtel	yps	1	Y box binding protein 1
1636390_at	Construct	0.000108958	CG14568	CG14568	1
1629218_at	Construct	0.000109323	Topoisomerase 3	Top3	1	topoisomerase DNA III beta
1635126_a_at	Construct	0.000109885	Ect4	Ect4	1
1629172_s_at	Construct	0.000110633	rickets	rk	1	leucine-rich repeat-containing G protein-coupled r
1624857_at	Construct	0.000110853	CG17510	CG17510	1
1632675_s_at	Construct	0.000114766	CG5455	CG5455	1
1634405_s_at	Construct	0.000115619	PAK-kinase	Pak	1	p21 Cdc42 Rac1-activated kinase 1 STE20 homolog
1630577_at	Construct	0.000117514	CG17378	CG17378	1	KIAA0513
1629221_at	Construct	0.000118539	modifier of rpr and grim, ubiquitously expressed	morgue	1
1639046_at	Construct	0.000119346	CG5454	CG5454	1	small nuclear ribonucleoprotein polypeptide C
1640201_at	Construct	0.000119346	CG10233	CG10233	1	chromosome 10 open reading frame 83
1639136_s_at	Construct	0.000119402	pipsqueak	psq	1
1630637_s_at	Construct	0.000121876	Heat shock protein cognate 4	Hsc70-4	1	heat shock 70kDa protein 8
1640915_at	Construct	0.000121876	CG3800	CG3800	1	CCHC-type zinc finger nucleic acid binding protein
1633209_s_at	Construct	0.000122842	eIF3-S9	eIF3-S9	1	eukaryotic translation initiation factor 3 subuni
1624775_at	Construct	0.000123326	CG10628	CG10628	1	GTP-binding protein 10 putative
1624520_a_at	Construct	0.000126855	ftz transcription factor 1	ftz-f1	1
1629578_at	Construct	0.000127382	CG8309	CG8309	1	PCI domain containing 1 herpesvirus entry mediato
1630996_s_at	Construct	0.000127382	CG17723	CG17723	1	solute carrier family 30 zinc transporter membe
1630688_at	Construct	0.000130171	Heat shock protein 83	Hsp83	1	heat shock protein 90kDa alpha cytosolic class
1626449_s_at	Construct	0.00013074	eukaryotic initiation factor 5C /// eIF-5C	eIF-5C /// DyakeIF-5C	1	basic leucine zipper and W2 domains 1
1631564_at	Construct	0.000131113	CG1490	CG1490	1	ubiquitin specific peptidase 7 herpes virus-assoc
1635260_at	Construct	0.000131677	Signal transducing adaptor molecule	Stam	1	signal transducing adaptor molecule SH3 domain an
1626294_a_at	Construct	0.000132755	stathmin	stai	1
1638464_a_at	Construct	0.000133119	quick-to-court	qtc	1
1636585_a_at	Construct	0.000135377	hikaru genki	hig	1
1635644_at	Construct	0.00013544	CG33203	CG33203	1	progestin and adipoQ receptor family member IV
1623017_at	Construct	0.000136356	CG7149	CG7149	1
1641105_at	Construct	0.000136451	Mediator complex subunit 20	MED20	1	Trf TATA binding protein-related factor -proximal
1639086_s_at	Construct	0.000140388	CG8863	CG8863	1	DnaJ Hsp40 homolog subfamily A member 4
1623739_at	Construct	0.0001413	Karyopherin 3	Kary3	1	RAN binding protein 5
1630119_s_at	Construct	0.000141333	no receptor potential A	norpA	1	phospholipase C beta 4
1638727_at	Construct	0.000142513	---	---	1
1622920_at	Construct	0.000143773	transient receptor potential	trp	1
1636463_at	Construct	0.000143773	Ucp4B	Ucp4B	1
1624208_s_at	Construct	0.000144167	ADP ribosylation factor 51F	Arf51F	1	ADP-ribosylation factor 6
1629059_at	Construct	0.000144215	---	---	1
1638319_at	Construct	0.000145717	inactivation no afterpotential D	inaD	1
1634325_a_at	Construct	0.000148347	Misexpression suppressor of KSR 2	MESK2	1	NDRG family member 3
1633313_at	Construct	0.000148852	SP2523	SP2523	1
1634630_at	Construct	0.000149124	CG5707	CG5707	1
1636321_s_at	Construct	0.00015002	CG13624	CG13624	1
1633443_s_at	Construct	0.000151988	CG2082	CG2082	1
1640974_a_at	Construct	0.000152084	CG33143	CG33143	1
1626178_s_at	Construct	0.000152574	---	---	1
1633234_at	Construct	0.000152574	CG2807	CG2807	1	splicing factor 3b subunit 1 155kDa
1623513_at	Construct	0.000155323	Upf1	Upf1	1	UPF1 regulator of nonsense transcripts homolog ye
1627472_at	Construct	0.000157877	Annexin X	AnnX	1	annexin A8
1640070_a_at	Construct	0.000159303	Saposin-related	Sap-r	1	prosaposin variant Gaucher disease and variant me
1639025_at	Construct	0.000160209	Trc8	Trc8	1	ring finger protein 139
1637684_at	Construct	0.000161544	unc-104	unc-104	1	kinesin family member 1B
1634858_s_at	Construct	0.00016194	whacked	wkd	1	TBC1 domain family member 10B
1629048_s_at	Construct	0.000162913	CG9674	CG9674	1
1630165_s_at	Construct	0.000162913	Sin3A	Sin3A	1	SIN3 homolog A transcription regulator yeast
1638560_a_at	Construct	0.000164133	CG1884	CG1884	1	CCR4-NOT transcription complex subunit 1
1624023_at	Construct	0.000164765	Protein phosphatase 1 at 87B	Pp1-87B	1	protein phosphatase 1 catalytic subunit gamma is
1627964_s_at	Construct	0.000165137	CG7888	CG7888	1
1627711_at	Construct	0.000166457	CDP diglyceride synthetase	CdsA	1	CDP-diacylglycerol synthase phosphatidate cytidyl
1630623_a_at	Construct	0.000167524	CG8058	CG8058	1	abhydrolase domain containing 3
1635165_a_at	Construct	0.000167862	CG12090 /// CG33971	CG12090 /// CG33971	1	DEP domain containing 5
1626924_a_at	Construct	0.000168461	Ribosomal protein S6	RpS6	1	ribosomal protein S6
1634315_a_at	Construct	0.000168461	CG32982	CG32982	1
1641083_at	Construct	0.000169057	CG3257	CG3257	1
1624230_s_at	Construct	0.000169197	Ubiquitin-63E	Ubi-p63E	1	ubiquitin C
1625295_at	Construct	0.000169407	kinase suppressor of ras	ksr	1	kinase suppressor of ras 1
1623966_s_at	Construct	0.00016969	Neurotactin	Nrt	1
1641104_s_at	Construct	0.00017293	Excitatory amino acid transporter 1	Eaat1	1	solute carrier family 1 glial high affinity gluta
1635907_at	Construct	0.000172947	CG7414	CG7414	1	eukaryotic translation initiation factor 2A 65kDa
1625131_s_at	Construct	0.00017389	Vacuolar H<up>+</up>-ATPase 55kD B subunit	Vha55	1	ATPase H+ transporting lysosomal 56 58kDa V1 su
1632285_at	Construct	0.00017523	CG2165 /// CG34036	CG2165 /// CG34036	1	ATPase Ca++ transporting plasma membrane 3
1637109_s_at	Construct	0.00017529	CG3961	CG3961	1	acyl-CoA synthetase long-chain family member 1
1640799_at	Construct	0.00017529	doublesex	dsx	1
1635725_a_at	Construct	0.00017535	unc-115	unc-115	1	actin binding LIM protein 1
1632443_at	Construct	0.000177656	CG10274	CG10274	1
1625358_s_at	Construct	0.00017829	CG9326	CG9326	1	membrane protein palmitoylated 6 MAGUK p55 subfa
1631526_s_at	Construct	0.00017829	CG31284	CG31284	1
1631772_a_at	Construct	0.000178917	MTA1-like	MTA1-like	1	metastasis associated 1
1625578_at	Construct	0.000179246	CG33097	CG33097	1
1633767_at	Construct	0.000179423	CG9373	CG9373	1	heterogeneous nuclear ribonucleoprotein M
1641321_a_at	Construct	0.000179423	CG5284	CG5284	1	chloride channel 3
1633935_at	Construct	0.000180629	skiff	skf	1	membrane protein palmitoylated 7 MAGUK p55 subfa
1629084_at	Construct	0.000180847	subunit of type II geranylgeranyl transferase	ggt-II	1	Rab geranylgeranyltransferase beta subunit
1631527_at	Construct	0.000181169	CG5642	CG5642	1	eukaryotic translation initiation factor 3 subuni
1635236_at	Construct	0.00018309	CG15690	CG15690	1
1638685_at	Construct	0.00018309	CG40127	CG40127	1
1626174_a_at	Construct	0.00018491	jdp	jdp	1	DnaJ Hsp40 homolog subfamily C member 12
1639690_a_at	Construct	0.000184955	six-banded	sba	1
1632119_s_at	Construct	0.000185904	lightoid	ltd	1
1635416_at	Construct	0.000187133	CG31100	CG31100	1
1624284_a_at	Construct	0.000187971	CG10473	CG10473	1	apoptotic chromatin condensation inducer 1
1639783_s_at	Construct	0.000187971	Rox8	Rox8	1	TIA1 cytotoxic granule-associated RNA binding prot
1629396_a_at	Construct	0.000188505	CG8486	CG8486	1
1629867_a_at	Construct	0.000188877	Ribosomal protein S29	RpS29	1	ribosomal protein S29
1640980_at	Construct	0.000191772	CG7218	CG7218	1
1634702_at	Construct	0.000192575	CG7227	CG7227	1
1625758_s_at	Construct	0.000192969	pitchoune	pit	1	DEAD Asp-Glu-Ala-Asp box polypeptide 18
1623753_at	Construct	0.000194133	Thiolester containing protein III	TepIII	1
1630457_s_at	Construct	0.000194349	blistery	by	1	tensin 1
1626663_s_at	Construct	0.000195104	Eb1	Eb1	1	microtubule-associated protein RP EB family memb
1627729_s_at	Construct	0.000195104	poly U binding factor 68kD	pUf68	1	fuse-binding protein-interacting repressor
1629227_at	Construct	0.000195104	bazooka	baz	1	par-3 partitioning defective 3 homolog C. elegans
1635757_at	Construct	0.000195104	CG11440	CG11440	1
1640364_at	Construct	0.000195104	nervana 1	nrv1	1	ATPase Na+ K+ transporting beta 1 polypeptide
1635338_a_at	Construct	0.000198318	CG10233	CG10233	1	chromosome 10 open reading frame 83
1630174_s_at	Construct	0.000199115	CG4908	CG4908	1	BCS1-like yeast
1633778_at	Construct	0.000199602	CG6070	CG6070	1	solute carrier family 7 cationic amino acid trans
1630728_a_at	Construct	0.000199759	photorepair	phr	1
1634364_s_at	Construct	0.000199876	CG32130	CG32130	1
1641289_at	Construct	0.000200235	---	---	1
1625970_at	Construct	0.000200241	expanded	ex	1
1633144_at	Construct	0.000200975	jitterbug	jbug	1
1623254_s_at	Construct	0.000201128	CG31531	CG31531	1
1624660_at	Construct	0.000202394	Protein tyrosine phosphatase 10D	Ptp10D	1	protein tyrosine phosphatase receptor type B
1637384_a_at	Construct	0.0002024	CG3638	CG3638	1
1629657_at	Construct	0.000203165	lethal (1) 19Ec	l(1)19Ec	1
1630896_at	Construct	0.000203165	CG2267	CG2267	1
1637280_at	Construct	0.000203165	LpR1	LpR1	1	low density lipoprotein receptor-related protein 8
1631636_at	Construct	0.000203173	CG13096	CG13096	1
1633506_s_at	Construct	0.000203458	CG6091	CG6091	1	OTU domain containing 5
1641475_at	Construct	0.000203458	Synaptotagmin IV	SytIV	1	synaptotagmin XI
1633353_s_at	Construct	0.000204065	CAP	CAP	1
1625172_s_at	Construct	0.000206968	CG2316	CG2316	1	ATP-binding cassette sub-family D ALD member 2
1639599_at	Construct	0.000207074	CG4887	CG4887	1	RNA binding motif protein 10
1626217_at	Construct	0.000207631	Inositol polyphosphate 1-phosphatase	Ipp	1	inositol polyphosphate-1-phosphatase
1629779_at	Construct	0.000208573	Macroglobulin complement-related	Mcr	1
1628956_at	Construct	0.000208752	BCL7-like	BCL7-like	1
1632465_s_at	Construct	0.000209014	CG6424	CG6424	1
1639862_at	Construct	0.000209014	Excitatory amino acid transporter 2	Eaat2	1	solute carrier family 1 glial high affinity gluta
1638498_s_at	Construct	0.000209045	CG1600	CG1600	1
1638299_at	Construct	0.000210084	CG7323	CG7323	1	pleckstrin homology domain containing family G w
1630650_at	Construct	0.000210161	Bicaudal D	BicD	1	bicaudal D homolog 2 Drosophila
1634935_a_at	Construct	0.000211719	CG1648	CG1648	1
1640656_a_at	Construct	0.000211719	Protein on ecdysone puffs	Pep	1
1636941_at	Construct	0.000212134	CG9007	CG9007	1
1640075_a_at	Construct	0.000212134	pathetic	path	1
1626061_at	Construct	0.000213077	CG30078	CG30078	1	transient receptor potential cation channel subfa
1630041_at	Construct	0.000214851	CG10899	CG10899	1
1641464_s_at	Construct	0.000214851	CG32850	CG32850	1	ring finger protein 11
1628771_s_at	Construct	0.000214886	CG32700	CG32700	1
1639431_at	Construct	0.000214914	synaptogyrin	synaptogyrin	1	synaptogyrin 1
1627498_at	Construct	0.000215466	Syndapin	Synd	1	protein kinase C and casein kinase substrate in ne
1636634_a_at	Construct	0.000215482	CG6214	CG6214	1	ATP-binding cassette sub-family C CFTR MRP mem
1623998_at	Construct	0.000215865	CG10565	CG10565	1	zuotin related factor 1
1626170_at	Construct	0.00021599	CG18445	CG18445	1	membrane bound O-acyltransferase domain containing
1624215_s_at	Construct	0.000216583	DISCO Interacting Protein 1	DIP1	1
1635854_s_at	Construct	0.000217647	CG40351	CG40351	1
1624481_a_at	Construct	0.000217873	CG31534	CG31534	1
1631724_s_at	Construct	0.000219968	CG17746	CG17746	1
1635502_at	Construct	0.000224136	CG8311	CG8311	1	transmembrane protein 15
1635479_a_at	Construct	0.000226393	---	---	1
1636301_s_at	Construct	0.000226902	La related protein	larp	1
1634430_at	Construct	0.000227407	CG14614	CG14614	1	WD repeat domain 68
1640329_s_at	Construct	0.000228554	Aps	Aps	1	nudix nucleoside diphosphate linked moiety X -typ
1626537_at	Construct	0.000229043	CG17321	CG17321	1
1637510_s_at	Construct	0.000229378	Hexosaminidase 1	Hexo1	1
1626749_a_at	Construct	0.000230066	CG18135	CG18135	1
1627509_s_at	Construct	0.000230072	hoepel1	hoe1	1	oculocutaneous albinism II pink-eye dilution homo
1635291_a_at	Construct	0.000230986	Zn72D	Zn72D	1
1623375_at	Construct	0.000232034	CG17081	CG17081	1	centrosomal protein 135kDa
1630376_at	Construct	0.000232382	onecut	onecut	1
1635630_a_at	Construct	0.000233057	spire	spir	1
1634881_at	Construct	0.000233873	lethal (2) NC136	l(2)NC136	1	CCR4-NOT transcription complex subunit 3
1639320_a_at	Construct	0.000234093	Dopa decarboxylase	Ddc	1	dopa decarboxylase aromatic L-amino acid decarbox
1623584_at	Construct	0.000234268	CG10473	CG10473	1	apoptotic chromatin condensation inducer 1
1623471_s_at	Construct	0.00023502	---	---	1
1638012_at	Construct	0.000235149	rotated abdomen	rt	1	protein-O-mannosyltransferase 1
1623244_at	Construct	0.000236039	Ect4	Ect4	1
1628220_at	Construct	0.000236969	---	---	1
1633059_at	Construct	0.000236969	CG6357	CG6357	1
1626200_s_at	Construct	0.000236972	temperature-induced paralytic E	tipE	1
1641284_a_at	Construct	0.000237055	CG6995	CG6995	1	scaffold attachment factor B2
1628875_at	Construct	0.000237847	painless	pain	1
1628189_at	Construct	0.000238689	Rep2	Rep2	1
1628862_at	Construct	0.000238689	tankyrase	tankyrase	1	tankyrase TRF1-interacting ankyrin-related ADP-ri
1635501_at	Construct	0.00024028	Adherens junction protein p120	p120ctn	1
1625272_at	Construct	0.000240837	CG31030	CG31030	1
1639169_at	Construct	0.00024182	CG18754	CG18754	1
1641137_at	Construct	0.000242473	Drop	Dr	1
1628726_s_at	Construct	0.000242481	Ral guanine nucleotide exchange factor 2	Rgl	1	ral guanine nucleotide dissociation stimulator-lik
1640952_at	Construct	0.000242481	CG1632	CG1632	1
1633012_at	Construct	0.000244497	CG3662	CG3662	1
1627462_a_at	Construct	0.000245278	CG4662	CG4662	1	EF-hand domain family member A2
1637164_at	Construct	0.000245278	Translationally controlled tumor protein	Tctp	1	tumor protein translationally-controlled 1
1633390_at	Construct	0.00024545	CG9056	CG9056	1
1632220_s_at	Construct	0.000245877	Ribosomal protein S26	RpS26	1	ribosomal protein S26
1623206_a_at	Construct	0.000246079	eyes absent	eya	1
1637017_at	Construct	0.000246968	Contactin	Cont	1	contactin 3 plasmacytoma associated
1640515_s_at	Construct	0.000246968	liquid facets	lqf	1	epsin 2
1631015_s_at	Construct	0.000249337	Ribosomal protein L5	RpL5	1
1628368_at	Construct	0.000249635	Sir2	Sir2	1	sirtuin silent mating type information regulation
1628779_a_at	Construct	0.000249635	seven up	svp	1	nuclear receptor subfamily 2 group F member 1
1623185_s_at	Construct	0.000250151	jaguar	jar	1	myosin VI
1637582_a_at	Construct	0.000251217	Nedd4	Nedd4	1	neural precursor cell expressed developmentally d
1639147_s_at	Construct	0.000252086	CG30438	CG30438	1	UDP glucuronosyltransferase 2 family polypeptide
1638527_a_at	Construct	0.000252655	CG40196	CG40196	1
1627410_at	Construct	0.00025311	Amphiphysin	Amph	1	amphiphysin Stiff-Man syndrome with breast cancer
1625756_at	Construct	0.000254317	CG6656	CG6656	1
1632533_at	Construct	0.000254437	Tissue inhibitor of metalloproteases	Timp	1
1635819_at	Construct	0.000255587	sprouty	sty	1
1630860_at	Construct	0.000256023	scratch	scrt	1
1624727_s_at	Construct	0.0002568	Ubiquitin-specific protease 64E	Ubp64E	1	ubiquitin specific peptidase 47
1624986_at	Construct	0.000258093	CG9836	CG9836	1	NifU-like N-terminal domain containing
1630106_at	Construct	0.000258095	CG10362	CG10362	1	PDZ domain containing 8
1624385_at	Construct	0.00025908	CG17735	CG17735	1	thyroid hormone receptor interactor 12
1637352_a_at	Construct	0.000259526	CG18812	CG18812	1	ganglioside induced differentiation associated pro
1626261_s_at	Construct	0.000259596	CG8029	CG8029	1
1640332_at	Construct	0.000260073	CG6972	CG6972	1
1629078_s_at	Construct	0.000262481	Protein kinase 61C	Pk61C	1	3-phosphoinositide dependent protein kinase-1
1633780_at	Construct	0.000262487	CG13793	CG13793	1
1623023_at	Construct	0.000262756	Slip1	Slip1	1	PDZ domain containing RING finger 3
1629012_at	Construct	0.00026304	capulet	capt	1
1641341_at	Construct	0.000263587	CG4552	CG4552	1	TBC1 domain family member 23
1640796_a_at	Construct	0.000263637	CG1812	CG1812	1	kelch-like 22 Drosophila
1630514_at	Construct	0.000264748	G protein-coupled receptor kinase 1	Gprk1	1
1637665_at	Construct	0.000264748	CG31367	CG31367	1	transcription elongation regulator 1
1639405_at	Construct	0.000264748	CG4857	CG4857	1
1639700_s_at	Construct	0.000264748	CG9281	CG9281	1	ATP-binding cassette sub-family F GCN20 member
1628245_at	Construct	0.000264977	CG31632	CG31632	1
1634200_a_at	Construct	0.000266042	CG9413	CG9413	1	solute carrier family 7 cationic amino acid trans
1634256_a_at	Construct	0.00026709	---	---	1
1629981_at	Construct	0.000267998	Lamin C	LamC	1	lamin B2
1625198_at	Construct	0.000268009	spineless	ss	1
1635156_s_at	Construct	0.000268309	cAMP-dependent protein kinase R1	Pka-R1	1	protein kinase cAMP-dependent regulatory type I
1632974_s_at	Construct	0.000269835	CG30015	CG30015	1
1638343_at	Construct	0.000269835	CG1143	CG1143	1
1637859_at	Construct	0.000271392	(A+T)-stretch binding protein	ATbp	1
1627948_at	Construct	0.000272407	atypical protein kinase C	aPKC	1	protein kinase C iota
1638521_a_at	Construct	0.000273403	CG1193	CG1193	1
1623374_a_at	Construct	0.000273698	Fimbrin	Fim	1	plastin 3 T isoform
1624177_at	Construct	0.000274096	CG7941	CG7941	1
1627021_at	Construct	0.000274145	CG8202	CG8202	1	esophageal cancer associated protein
1638274_s_at	Construct	0.000274145	CG5651	CG5651	1	ATP-binding cassette sub-family E OABP member
1636651_a_at	Construct	0.000274378	Cysteine string protein	Csp	1	DnaJ Hsp40 homolog subfamily C member 5
1639770_at	Construct	0.000274378	CG30421 /// GA15834	CG30421 /// DpseGA15834	1	ubiquitin specific peptidase 31
1625838_at	Construct	0.000275834	Rab-protein 3	Rab3	1	RAB3C member RAS oncogene family
1629507_a_at	Construct	0.000277145	maleless	mle	1	DEAH Asp-Glu-Ala-His box polypeptide 9
1625827_s_at	Construct	0.000277224	CG31992	CG31992	1	trinucleotide repeat containing 6C
1633261_a_at	Construct	0.000278336	CG9107	CG9107	1	CGI-96 protein
1635828_at	Construct	0.000278827	Chd64	Chd64	1	calponin 3 acidic
1636991_s_at	Construct	0.000278827	epithelial membrane protein	emp	1	scavenger receptor class B member 1
1641427_at	Construct	0.000278827	fear-of-intimacy	foi	1	solute carrier family 39 zinc transporter membe
1633821_at	Construct	0.000279494	B52	B52	1	splicing factor arginine serine-rich 6
1633016_a_at	Construct	0.000279851	staufen	stau	1	staufen RNA binding protein homolog 2 Drosophil
1633286_at	Construct	0.000279851	CG32372	CG32372	1
1638500_at	Construct	0.000279851	DMAP1	DMAP1	1	DNA methyltransferase 1 associated protein 1
1625081_at	Construct	0.000280165	CG17260	CG17260	1
1629417_s_at	Construct	0.000282371	CG14853	CG14853	1
1637807_at	Construct	0.00028312	inactivation no afterpotential C	inaC	1
1631216_a_at	Construct	0.000283336	CG18375	CG18375	1	tumor protein p53 binding protein 2
1625321_a_at	Construct	0.000284526	CG7549	CG7549	1
1627721_at	Construct	0.000284526	CG12880	CG12880	1
1631687_at	Construct	0.000284526	tre oncogene-related protein	RN-tre	1	USP6 N-terminal like
1638703_a_at	Construct	0.000284526	CG32048	CG32048	1
1624198_at	Construct	0.000284912	CG12582	CG12582	1	mannosidase beta A lysosomal
1630503_at	Construct	0.000284912	CG6045	CG6045	1
1626925_at	Construct	0.000284976	Guanylyl cyclase at 76C	Gyc76C	1
1629020_s_at	Construct	0.000285187	armadillo	arm	1	catenin cadherin-associated protein beta 1 88k
1633711_a_at	Construct	0.000285187	CG31012	CG31012	1
1624780_at	Construct	0.000285653	CG2995	CG2995	1	euchromatic histone-lysine N-methyltransferase 2
1635074_s_at	Construct	0.000285653	---	---	1
1636880_s_at	Construct	0.000286372	complexin	cpx	1
1635842_at	Construct	0.000286565	CG9311	CG9311	1	protein tyrosine phosphatase non-receptor type 23
1635705_at	Construct	0.000286833	CG12858	CG12858	1	FLJ20160 protein
1638248_at	Construct	0.000287755	CG32350	CG32350	1
1632433_at	Construct	0.000288042	CG17598	CG17598	1	protein phosphatase 1H PP2C domain containing
1625279_a_at	Construct	0.000290073	tailup	tup	1	ISL1 transcription factor LIM homeodomain islet
1633369_s_at	Construct	0.000290073	CG6184	CG6184	1
1625685_at	Construct	0.000290266	lethal (3) IX-14	l(3)IX-14	1	leishmanolysin-like metallopeptidase M8 family
1629250_at	Construct	0.00029031	CG10077	CG10077	1	DEAD Asp-Glu-Ala-Asp box polypeptide 5
1631500_at	Construct	0.00029031	modifier of mdg4	mod(mdg4)	1
1630078_a_at	Construct	0.000290367	CG32000	CG32000	1	ATPase type 13A3
1633157_a_at	Construct	0.000291429	igloo	igl	1
1636254_s_at	Construct	0.00029144	---	---	1
1628729_at	Construct	0.000291967	ventral veins lacking	vvl	1	POU domain class 3 transcription factor 2
1632176_at	Construct	0.000292484	CG5623	CG5623	1
1641237_a_at	Construct	0.000292484	SP555	SP555	1
1631028_s_at	Construct	0.000293895	lethal (2) k09913	l(2)k09913	1
1637457_at	Construct	0.000294117	CG7646	CG7646	1
1637515_s_at	Construct	0.000295107	cul-2	cul-2	1	cullin 2
1632231_a_at	Construct	0.00029535	Myosin heavy chain-like	Mhcl	1	myosin XVIIIA
1633135_s_at	Construct	0.00029535	CG18854	CG18854	1
1639839_s_at	Construct	0.000295592	Hairless	H	1
1627886_at	Construct	0.000296067	Autophagy-specific gene 1	Atg1	1	unc-51-like kinase 2 C. elegans
1625041_at	Construct	0.000297014	Organic anion transporting polypeptide 74D	Oatp74D	1
1639524_at	Construct	0.000297139	CG18604	CG18604	1
1626457_s_at	Construct	0.000297165	CG31163	CG31163	1	chromosome X open reading frame 9
1639403_s_at	Construct	0.000297962	CG4523	CG4523	1
1638764_at	Construct	0.000298451	CG13516	CG13516	1
1626837_a_at	Construct	0.000298954	CG32245	CG32245	1	stomatin
1628791_at	Construct	0.000298954	CG13933	CG13933	1
1629479_a_at	Construct	0.000298954	fledgling of Klp38B	fok	1
1631568_a_at	Construct	0.000298954	stardust	sdt	1	membrane protein palmitoylated 5 MAGUK p55 subfa
1637763_a_at	Construct	0.000299088	CG8298	CG8298	1
1634924_at	Construct	0.00029928	Spt6	Spt6	1	suppressor of Ty 6 homolog S. cerevisiae
1626785_at	Construct	0.000299784	Nucleosome assembly protein 1	Nap1	1	nucleosome assembly protein 1-like 1
1624435_at	Construct	0.000299876	Tetraspanin 42Ej	Tsp42Ej	1
1627280_s_at	Construct	0.000300858	peanut	pnut	1	septin 7
1624190_at	Construct	0.000301794	CG31637	CG31637	1	carbohydrate keratan sulfate Gal-6 sulfotransfer
1641027_at	Construct	0.000302182	CG12084	CG12084	1	zyg-11 homolog B C. elegans -like
1624387_at	Construct	0.000303051	---	---	1
1628719_at	Construct	0.000303051	cryptochrome	cry	1
1632485_a_at	Construct	0.000303688	Numb-associated kinase	Nak	1
1625464_at	Construct	0.000304001	Mitochondrial assembly regulatory factor	Marf	1	mitofusin 2
1629694_at	Construct	0.000305367	Pabp2	Pabp2	1	poly A binding protein nuclear 1
1627865_a_at	Construct	0.000305742	---	---	1
1631940_s_at	Construct	0.000305742	Centrosomal protein 190kD	Cp190	1
1636126_at	Construct	0.000307294	CG8290	CG8290	1
1633582_at	Construct	0.00030757	I<down>h</down> channel	Ih	1
1633792_a_at	Construct	0.000307611	osa	osa	1	AT rich interactive domain 1A SWI- like
1625514_s_at	Construct	0.000309148	olf186-F	olf186-F	1	transmembrane protein 142A
1624176_at	Construct	0.000310376	CG10590	CG10590	1	transmembrane 9 superfamily member 3
1637100_at	Construct	0.000311053	Bx42	Bx42	1	SNW domain containing 1
1632679_s_at	Construct	0.000312572	espinas	esn	1
1625195_s_at	Construct	0.000312831	schnurri	shn	1
1639140_at	Construct	0.000313395	CG8400	CG8400	1	Fas TNFRSF6 associated factor 1
1631931_s_at	Construct	0.000313966	Syndecan	Sdc	1
1640486_s_at	Construct	0.000313966	Protein Kinase D	PKD	1	protein kinase D3
1641548_at	Construct	0.000313966	CG10289	CG10289	1	SAPS domain family member 3
1637509_s_at	Construct	0.000314151	Tim10	Tim10	1	translocase of inner mitochondrial membrane 10 hom
1627818_s_at	Construct	0.00031581	Glutamic acid decarboxylase 1	Gad1	1	glutamate decarboxylase 1 brain 67kDa
1629453_at	Construct	0.000316045	FucTA	FucTA	1	fucosyltransferase 6 alpha 1 3 fucosyltransfera
1624550_at	Construct	0.000316243	TBP-related factor	Trf	1
1627456_s_at	Construct	0.00031661	mushroom-body expressed	mub	1	poly rC binding protein 3
1634170_a_at	Construct	0.000316714	jitterbug	jbug	1
1633646_at	Construct	0.000316801	inaF	inaF	1
1628254_at	Construct	0.00031697	CG31847	CG31847	1
1638963_s_at	Construct	0.000317612	mrj	mrj	1	DnaJ Hsp40 homolog subfamily B member 6
1631481_a_at	Construct	0.000318308	Kruppel homolog 1	Kr-h1	1
1637150_at	Construct	0.000318308	CG13928	CG13928	1
1637308_at	Construct	0.000318552	CG11417	CG11417	1	chromosome 20 open reading frame 6
1639118_a_at	Construct	0.000318668	Heterogeneous nuclear ribonucleoprotein at 87F	Hrb87F	1	heterogeneous nuclear ribonucleoprotein A1
1640912_s_at	Construct	0.000319112	scarface	scarface	1
1634683_at	Construct	0.00031988	Mothers against dpp	Mad	1	SMAD mothers against DPP homolog 1 Drosophila
1641233_a_at	Construct	0.000319985	conserved membrane protein at 44E	cmp44E	1	KIAA0953
1634962_s_at	Construct	0.000320569	hu li tai shao	hts	1	adducin 1 alpha
1629325_at	Construct	0.000322157	---	---	1
1641300_s_at	Construct	0.000322991	gus /// gustavus	Dyakgus /// gus	1
1634805_at	Construct	0.000323658	CG14642	CG14642	1
1639757_at	Construct	0.000323994	myotubularin	myotubularin	1	myotubularin related protein 2
1638937_at	Construct	0.000325656	CG3488	CG3488	1	abhydrolase domain containing 2
1638962_at	Construct	0.000326255	CG6227	CG6227	1	DEAD Asp-Glu-Ala-Asp box polypeptide 46
1637428_a_at	Construct	0.000326456	---	---	1
1624838_a_at	Construct	0.000326999	short neuropeptide F precursor	sNPF	1
1631149_s_at	Construct	0.000327502	La autoantigen-like	La	1	Sjogren syndrome antigen B autoantigen La
1630075_s_at	Construct	0.00032769	CG9699	CG9699	1	septin 5
1638953_a_at	Construct	0.00032952	draper	drpr	1	multiple EGF-like-domains 11
1625732_at	Construct	0.000329556	dpr8	dpr8	1
1637948_at	Construct	0.000331459	---	---	1
1632680_at	Construct	0.000332756	Polypeptide N-acetylgalactosaminyltransferase 35A	Pgant35A	1	UDP-N-acetyl-alpha-D-galactosamine:polypeptide N-a
1638929_at	Construct	0.000332904	CG8920	CG8920	1
1632281_at	Construct	0.000333034	CG4266	CG4266	1	splicing factor arginine serine-rich 15
1637000_at	Construct	0.000334234	Vha68-1	Vha68-1	1
1631371_s_at	Construct	0.000335841	Phosphodiesterase 8	Pde8	1	phosphodiesterase 8B
1635995_a_at	Construct	0.000335841	Mms19	Mms19	1	MMS19-like MET18 homolog S. cerevisiae
1640191_a_at	Construct	0.000336574	CG6854	CG6854	1	CTP synthase
1636914_at	Construct	0.000337482	Cdk5 activator-like protein	Cdk5	1
1625763_at	Construct	0.000338119	CG2789	CG2789	1	translocator protein 18kDa
1640750_at	Construct	0.00033869	CG4841	CG4841	1	KIAA1109
1634492_s_at	Construct	0.000339134	CG7597	CG7597	1	cell division cycle 2-like 5 cholinesterase-relat
1629696_a_at	Construct	0.000339922	CG30497	CG30497	1	family with sequence similarity 46 member C
1630323_at	Construct	0.000339922	CG6914	CG6914	1
1625533_at	Construct	0.00034029	basket	bsk	1	mitogen-activated protein kinase 10
1624412_at	Construct	0.000340952	apterous	ap	1	LIM homeobox 2
1632392_s_at	Construct	0.000340952	Slowpoke binding protein	Slob	1
1635342_at	Construct	0.000340952	CG10306	CG10306	1	eukaryotic translation initiation factor 3 subuni
1636970_at	Construct	0.000340952	CG9394	CG9394	1
1636496_at	Construct	0.000341379	Nup153	Nup153	1	nucleoporin 153kDa
1638171_s_at	Construct	0.00034193	CG1753	CG1753	1	cystathionine-beta-synthase
1627002_at	Construct	0.000342036	CG17446	CG17446	1	CXXC finger 1 PHD domain
1634555_at	Construct	0.000342654	CG11033	CG11033	1	F-box and leucine-rich repeat protein 11
1631521_at	Construct	0.000344006	CG33469	CG33469	1
1639242_a_at	Construct	0.000344546	CG6455	CG6455	1	inner membrane protein mitochondrial mitofilin
1636248_at	Construct	0.000344681	CG15628	CG15628	1
1639006_at	Construct	0.000344681	modifier of mdg4	mod(mdg4)	1
1639535_at	Construct	0.000344681	polypeptide GalNAc transferase 2	pgant2	1	UDP-N-acetyl-alpha-D-galactosamine:polypeptide N-a
1635727_a_at	Construct	0.000344866	Cyp4g15	Cyp4g15	1
1641460_at	Construct	0.000344866	Calcineurin B	CanB	1
1629369_at	Construct	0.000345019	CG7457	CG7457	1	nuclear factor of kappa light polypeptide gene enh
1639720_at	Construct	0.00034532	CG6600	CG6600	1
1626044_at	Construct	0.000345424	CG7628	CG7628	1	solute carrier family 20 phosphate transporter
1634021_a_at	Construct	0.000345445	P-element somatic inhibitor	Psi	1	far upstream element FUSE binding protein 1
1633026_a_at	Construct	0.000346579	CG31158	CG31158	1
1629252_at	Construct	0.000346935	CG14657	CG14657	1
1636454_at	Construct	0.000347411	CG7956	CG7956	1	inositol polyphosphate-5-phosphatase F
1627454_a_at	Construct	0.000347526	coracle	cora	1
1633613_at	Construct	0.000347601	CG2765	CG2765	1
1627765_a_at	Construct	0.000347834	endophilin B	endoB	1	SH3-domain GRB2-like endophilin B2
1625856_at	Construct	0.000348171	diminutive	dm	1
1635754_at	Construct	0.000348171	tango	tgo	1	aryl hydrocarbon receptor nuclear translocator
1632815_at	Construct	0.00034864	CG16952	CG16952	1	BTB POZ domain containing 7
1632045_at	Construct	0.000349921	CG5697	CG5697	1
1627054_at	Construct	0.000351786	outspread	osp	1
1634191_at	Construct	0.000352157	CG6398	CG6398	1
1633878_at	Construct	0.000352183	Misexpression suppressor of ras 4	MESR4	1
1638208_at	Construct	0.000353359	CG17019	CG17019	1	ring finger protein 34
1634474_s_at	Construct	0.00035461	CG5684	CG5684	1	CCR4-NOT transcription complex subunit 7
1623737_a_at	Construct	0.000354728	Rab-protein 14	Rab14	1	RAB14 member RAS oncogene family
1637710_at	Construct	0.000354889	karst	kst	1
1625196_a_at	Construct	0.000355186	CG14995	CG14995	1
1625747_at	Construct	0.000358121	RhoGAP92B	RhoGAP92B	1	Rho GTPase activating protein 17
1637703_a_at	Construct	0.000358121	Suppressor of cytokine signaling at 36E	Socs36E	1
1632238_at	Construct	0.000358614	CG13248	CG13248	1	solute carrier family 7 cationic amino acid trans
1635070_at	Construct	0.000358841	CG9953	CG9953	1	protease serine 16 thymus
1627821_s_at	Construct	0.000359277	Syt7	Syt7	1	synaptotagmin VII
1630524_at	Construct	0.000359413	---	---	1
1640429_a_at	Construct	0.000360184	CG6145	CG6145	1
1631018_at	Construct	0.000361034	312	312	1
1641685_at	Construct	0.000361682	CG6311	CG6311	1
1629741_at	Construct	0.000361854	CG32666	CG32666	1	serine threonine kinase 17a apoptosis-inducing
1631637_a_at	Construct	0.000362287	Cytochrome P450 reductase	Cpr	1	P450 cytochrome oxidoreductase
1635755_a_at	Construct	0.000362869	CG10741	CG10741	1
1623404_at	Construct	0.000362908	CG16890	CG16890	1	chromosome 10 open reading frame 4
1640058_at	Construct	0.000363544	CG8216	CG8216	1
1626602_at	Construct	0.000363754	Receptor of activated protein kinase C 1	Rack1	1	guanine nucleotide binding protein G protein be
1625215_s_at	Construct	0.000363876	nervana 2	nrv2	1
1629030_a_at	Construct	0.000363876	CG18659	CG18659	1
1636170_at	Construct	0.000363876	CG13607	CG13607	1
1631844_at	Construct	0.000363937	Myosin 95E	Myo95E	1	myosin IB
1634316_at	Construct	0.000366142	CG1582	CG1582	1	DEAH Asp-Glu-Ala-Asp His box polypeptide 57
1638807_s_at	Construct	0.000366813	CG4829	CG4829	1	gamma-glutamyltransferase 1
1630756_at	Construct	0.000367773	raptor /// Multiple inositol polyphosphate phosphatase 2	raptor /// Mipp2	1	raptor
1638004_at	Construct	0.000368135	Calbindin 53E	Cbp53E	1	calbindin 2 29kDa calretinin
1639028_a_at	Construct	0.00037082	CG30296	CG30296	1
1639613_at	Construct	0.00037091	shotgun	shg	1
1623277_at	Construct	0.000371272	CG17100	CG17100	1
1626840_a_at	Construct	0.000371451	CG8479	CG8479	1	optic atrophy 1 autosomal dominant
1639596_at	Construct	0.000371695	CG7781	CG7781	1
1636187_at	Construct	0.000371928	CG33798	CG33798	1
1640736_at	Construct	0.000372909	black	b	1	cysteine sulfinic acid decarboxylase
1632200_s_at	Construct	0.000374117	CG3810	CG3810	1	ER degradation enhancer mannosidase alpha-like 2
1637554_a_at	Construct	0.000374304	DP transcription factor	Dp	1	transcription factor Dp-2 E2F dimerization partne
1630764_at	Construct	0.000375288	CG8683	CG8683	1	MON2 homolog S. cerevisiae
1637054_s_at	Construct	0.000375288	RluA-1	RluA-1	1	RNA pseudouridylate synthase domain containing 2
1640691_at	Construct	0.000375288	CG4030	CG4030	1	rabaptin RAB GTPase binding effector protein 1
1623580_at	Construct	0.000375683	Tubulin at 84B	Tub84B	1	tubulin alpha 3
1627184_at	Construct	0.000375683	scaf6	scaf6	1	calcium homeostasis endoplasmic reticulum protein
1640886_a_at	Construct	0.000375683	kayak	kay	1
1635703_s_at	Construct	0.000376249	l(3)82Fd	l(3)82Fd	1
1636655_s_at	Construct	0.0003763	---	---	1
1634625_at	Construct	0.000377686	DNZDHHC/NEW1 zinc finger protein 11	Dnz1	1
1626815_a_at	Construct	0.000378099	CG9264	CG9264	1
1634093_at	Construct	0.000378099	CG32017	CG32017	1
1640703_at	Construct	0.000378099	CG30460	CG30460	1
1625250_at	Construct	0.000378174	CG5802	CG5802	1	solute carrier family 35 member B1
1631516_s_at	Construct	0.000378759	skuld	skd	1	thyroid hormone receptor associated protein 2
1635360_at	Construct	0.000380524	CG10830	CG10830	1	potassium channel tetramerisation domain containin
1626657_a_at	Construct	0.000381407	wolfram syndrome 1	wfs1	1	Wolfram syndrome 1 wolframin
1640371_a_at	Construct	0.000382712	Ets at 65A	Ets65A	1
1636015_s_at	Construct	0.000383036	CG32850	CG32850	1	ring finger protein 11
1625317_at	Construct	0.00038427	CG3735	CG3735	1	chromosome 1 open reading frame 107
1627788_at	Construct	0.000384612	CG14722	CG14722	1	WD repeat domain 55
1632757_a_at	Construct	0.000384895	CG11760	CG11760	1
1641380_a_at	Construct	0.000384895	taranis	tara	1
1641605_at	Construct	0.000385917	PIP82	PIP82	1
1641566_s_at	Construct	0.0003877	I'm not dead yet	Indy	1	solute carrier family 13 sodium-dependent dicarbo
1627259_a_at	Construct	0.000388079	ovo	ovo	1
1641689_at	Construct	0.00038818	CG12822	CG12822	1
1626790_s_at	Construct	0.000388895	Focal Adhesion Kinase	Fak56D	1	PTK2 protein tyrosine kinase 2
1634015_s_at	Construct	0.00038965	CG5077	CG5077	1	oxysterol binding protein-like 8
1623848_a_at	Construct	0.000390037	---	---	1
1641279_at	Construct	0.000390037	bendless	ben	1	ubiquitin-conjugating enzyme E2N UBC13 homolog y
1627617_at	Construct	0.000390556	Bestrophin 1	Best1	1	vitelliform macular dystrophy 2-like 1
1641023_at	Construct	0.000390556	rapamycin-insensitive companion of Tor	rictor	1	rapamycin-insensitive companion of mTOR
1631769_at	Construct	0.000390956	punt	put	1	activin A receptor type IIA
1637716_a_at	Construct	0.00039131	squid	sqd	1	heterogeneous nuclear ribonucleoprotein D-like
1628292_s_at	Construct	0.000391476	Helix loop helix protein 106	HLH106	1	sterol regulatory element binding transcription fa
1639818_s_at	Construct	0.000391476	hiiragi	hrg	1	poly A polymerase alpha
1630570_at	Construct	0.000391992	CG13003	CG13003	1
1632394_s_at	Construct	0.000391992	---	---	1
1634504_a_at	Construct	0.000391992	small optic lobes	sol	1	small optic lobes homolog Drosophila
1636948_a_at	Construct	0.000392006	Glycyl-tRNA synthetase	Aats-gly	1	glycyl-tRNA synthetase
1630901_a_at	Construct	0.000392807	CG6422	CG6422	1	YTH domain family member 3
1635580_at	Construct	0.000392838	Cbl	Cbl	1	Cas-Br-M murine ecotropic retroviral transformin
1625794_at	Construct	0.000394046	CG5830	CG5830	1	CTD carboxy-terminal domain RNA polymerase II p
1625813_at	Construct	0.000394046	CG8290	CG8290	1
1633283_at	Construct	0.000394046	CG6764	CG6764	1	chromosome 15 open reading frame 15
1633412_s_at	Construct	0.000394046	CG3249	CG3249	1	A kinase PRKA anchor protein 1
1636576_s_at	Construct	0.000394046	no receptor potential A	norpA	1	phospholipase C beta 4
1622976_at	Construct	0.00039488	modifier of mdg4	mod(mdg4)	1
1625793_at	Construct	0.00039488	DNA replication-related element factor	Dref	1
1634452_s_at	Construct	0.000394967	endophilin A	endoA	1	SH3-domain GRB2-like 3
1630361_at	Construct	0.000396586	naked cuticle	nkd	1
1632936_at	Construct	0.000397341	Man-IIb	Man-IIb	1	mannosidase alpha class 2A member 1
1632932_a_at	Construct	0.000398203	CG33171	CG33171	1	collagen type XV alpha 1
1639014_at	Construct	0.000399774	CG5404	CG5404	1
1639387_s_at	Construct	0.000399851	croquemort	crq	1
1635475_at	Construct	0.000400016	cornetto	corn	1
1637284_at	Construct	0.000400022	Rlip	Rlip	1	ralA binding protein 1
1634849_at	Construct	0.000400764	CG9247	CG9247	1	hypothetical protein FLJ20433
1635928_a_at	Construct	0.000400764	cAMP-dependent protein kinase	Pka-C3	1	protein kinase X-linked
1631979_at	Construct	0.000401316	MICAL-like	MICAL-like	1
1640317_at	Construct	0.000401316	zeste	z	1
1640758_at	Construct	0.000401316	CG32613	CG32613	1
1623227_s_at	Construct	0.000401764	Hillarin	Hil	1
1639759_s_at	Construct	0.000401764	vulcan	vlc	1
1639837_at	Construct	0.000401764	Rabphilin	Rph	1	rabphilin 3A homolog mouse
1637193_at	Construct	0.000402143	eIF3-S8	eIF3-S8	1	eukaryotic translation initiation factor 3 subuni
1638102_s_at	Construct	0.000402143	---	---	1
1632653_at	Construct	0.000402773	CG31555	CG31555	1
1632526_s_at	Construct	0.000402804	Neural conserved at 73EF	Nc73EF	1	oxoglutarate alpha-ketoglutarate dehydrogenase
1635743_at	Construct	0.000402804	Van Gogh	Vang	1	vang-like 1 van gogh Drosophila
1628488_at	Construct	0.000404143	CG6051	CG6051	1
1627334_at	Construct	0.000404798	Tetraspanin 39D	Tsp39D	1
1627953_at	Construct	0.000404798	modifier of mdg4	mod(mdg4)	1
1630270_s_at	Construct	0.000405674	Ribosomal protein L3	RpL3	1	ribosomal protein L3
1633131_s_at	Construct	0.000405674	CG32164 /// CG32165	CG32164 /// CG32165	1	importin 4
1634487_at	Construct	0.000405674	tau	tau	1	microtubule-associated protein tau
1634574_a_at	Construct	0.000405674	Stretchin-Mlck	Strn-Mlck	1
1634576_at	Construct	0.000405674	Notch	N	1	Notch homolog 1 translocation-associated Drosoph
1624873_at	Construct	0.000406997	karmoisin	kar	1	solute carrier family 16 member 10 aromatic amin
1625775_a_at	Construct	0.000407493	corkscrew	csw	1	protein tyrosine phosphatase non-receptor type 11
1627567_at	Construct	0.000407777	Myb oncogene-like	Myb	1	v-myb myeloblastosis viral oncogene homolog avian
1624720_s_at	Construct	0.000408136	CG6043	CG6043	1
1623429_at	Construct	0.00041007	CG11073	CG11073	1
1624981_a_at	Construct	0.000410286	CG10576	CG10576	1	proliferation-associated 2G4 38kDa
1633331_at	Construct	0.000411414	domino	dom	1
1632537_at	Construct	0.000411689	CdGAPr	CdGAPr	1
1627623_s_at	Construct	0.000412817	bicaudal	bic	1	basic transcription factor 3-like 4
1636186_s_at	Construct	0.00041363	Ferritin 2 light chain homologue	Fer2LCH	1
1625183_at	Construct	0.00041476	smell impaired 35A	smi35A	1	dual-specificity tyrosine- Y -phosphorylation regu
1636253_at	Construct	0.00041476	CG9330	CG9330	1	ATP-binding cassette sub-family F GCN20 member
1636847_s_at	Construct	0.00041476	Makorin 1	Mkrn1	1	makorin ring finger protein 3
1640240_s_at	Construct	0.00041476	CG4165	CG4165	1	ubiquitin specific peptidase 45
1637612_at	Construct	0.000414961	CG6017	CG6017	1	zinc finger DHHC-type containing 17
1623327_at	Construct	0.000415593	---	---	1
1625898_s_at	Construct	0.000415593	Lnk	Lnk	1	SH2B adaptor protein 2
1624812_at	Construct	0.000415906	CG11070	CG11070	1	ubiquitination factor E4A UFD2 homolog yeast
1639944_at	Construct	0.000417951	Cyp9f2	Cyp9f2	1	cytochrome P450 family 3 subfamily A polypeptid
1637819_at	Construct	0.000419227	CG6192	CG6192	1	RALBP1 associated Eps domain containing 1
1631610_at	Construct	0.000419363	CG31886	CG31886	1
1632260_s_at	Construct	0.00042003	bruno-2	bru-2	1	CUG triplet repeat RNA binding protein 1
1630964_at	Construct	0.000420627	CG15211	CG15211	1
1624541_at	Construct	0.000422179	RhoGAP19D	RhoGAP19D	1
1629080_at	Construct	0.000422179	CG32013 /// CG41101	CG32013 /// CG41101	1
1639121_at	Construct	0.000422415	Actin-related protein 87C	Arp87C	1	ARP1 actin-related protein 1 homolog A centractin
1639047_at	Construct	0.000423088	multiple ankyrin repeats single KH domain	mask	1
1640997_at	Construct	0.000423088	CG30122	CG30122	1	heterogeneous nuclear ribonucleoprotein U scaffol
1625581_at	Construct	0.000424334	CG10011	CG10011	1	ankyrin repeat domain 50
1639288_at	Construct	0.000424799	Mystery 45A	Mys45A	1	SDA1 domain containing 1
1624429_at	Construct	0.000426578	CG3967	CG3967	1
1631765_at	Construct	0.000426578	puckered	puc	1	dual specificity phosphatase 10
1639635_s_at	Construct	0.000426578	CG4196	CG4196	1	transmembrane protein 165
1635904_s_at	Construct	0.00042711	BTB-protein-VII	BtbVII	1
1630025_at	Construct	0.000428426	CG2865	CG2865	1
1632395_s_at	Construct	0.000429032	Vha100-1	Vha100-1	1	ATPase H+ transporting lysosomal V0 subunit a1
1624361_s_at	Construct	0.000429721	lethal (2) 01424	l(2)01424	1	eukaryotic translation initiation factor 4 gamma
1628402_a_at	Construct	0.000429806	GlcAT-S	GlcAT-S	1
1633069_s_at	Construct	0.000429806	CG10277	CG10277	1	ring finger protein 13
1631142_a_at	Construct	0.000430117	Calcium activated protein for secretion	Caps	1	Ca2+-dependent secretion activator
1624042_at	Construct	0.000430281	G protein-coupled receptor kinase 2	Gprk2	1	G protein-coupled receptor kinase 5
1639827_at	Construct	0.000430905	CG3581	CG3581	1
1624452_a_at	Construct	0.000431818	pale	ple	1	tyrosine hydroxylase
1638079_at	Construct	0.000431818	lethal (2) 05510	l(2)05510	1
1630145_s_at	Construct	0.000432103	Tetraspanin 42Ea	Tsp42Ea	1
1640653_at	Construct	0.000433163	Eukaryotic initiation factor 4B	eIF-4B	1
1628114_s_at	Construct	0.000433605	Pten	Pten	1	phosphatase and tensin homolog mutated in multipl
1628135_s_at	Construct	0.000433901	pickel	pck	1
1625148_s_at	Construct	0.000434261	14-3-3	14-3-3	1	tyrosine 3-monooxygenase tryptophan 5-monooxygenas
1633533_at	Construct	0.000434261	CG6329	CG6329	1
1629866_at	Construct	0.0004349	Suv4-20	Suv4-20	1
1630807_at	Construct	0.000435758	CG33111	CG33111	1
1628739_at	Construct	0.000436255	CG33528	CG33528	1	solute carrier family 18 vesicular monoamine me
1622939_at	Construct	0.000437325	embargoed	emb	1	exportin 1 CRM1 homolog yeast
1641115_at	Construct	0.000438082	CG10055	CG10055	1	SHQ1 homolog S. cerevisiae
1627761_at	Construct	0.000438528	fat2	fat2	1	FAT tumor suppressor homolog 1 Drosophila
1625011_at	Construct	0.000439578	CG11206	CG11206	1	hypothetical protein FLJ43806
1634593_at	Construct	0.000439578	CG40228	CG40228	1
1634855_s_at	Construct	0.000439578	CG9813	CG9813	1
1638748_at	Construct	0.000439578	extra macrochaetae	emc	1
1641145_at	Construct	0.000439578	---	---	1
1627802_s_at	Construct	0.000439588	Sur-8	Sur-8	1	soc-2 suppressor of clear homolog C. elegans
1638367_at	Construct	0.000440485	CG7686	CG7686	1	LTV1 homolog S. cerevisiae
1638931_at	Construct	0.000440485	lethal (2) k08015	l(2)k08015	1
1640465_at	Construct	0.000440485	CG17124	CG17124	1
1631427_s_at	Construct	0.000441339	synaptojanin	synj	1	synaptojanin 1
1626056_a_at	Construct	0.000442007	eco	eco	1
1636302_s_at	Construct	0.00044287	Suppressor of deltex	Su(dx)	1	WW domain containing E3 ubiquitin protein ligase 1
1639594_at	Construct	0.000443029	CG40485	CG40485	1
1628763_at	Construct	0.000443219	Ptpmeg	Ptpmeg	1	protein tyrosine phosphatase non-receptor type 4
1639825_at	Construct	0.000443575	comatose	comt	1	N-ethylmaleimide-sensitive factor
1635871_at	Construct	0.000444186	#NAME?	Cop	1	coatomer protein complex subunit beta 2 beta pri
1623782_at	Construct	0.000445945	SCAP	SCAP	1	SREBP cleavage-activating protein
1635222_at	Construct	0.000446064	CG1513	CG1513	1	oxysterol binding protein-like 9
1626660_at	Construct	0.000446669	CG15024	CG15024	1
1631368_s_at	Construct	0.000446669	CG8108	CG8108	1
1638397_at	Construct	0.000447175	CG11388	CG11388	1	chromosome 3 open reading frame 21
1636816_s_at	Construct	0.000447179	CG33090	CG33090	1	glucosidase beta bile acid 2
1635267_s_at	Construct	0.000447446	Tetraspanin 66E	Tsp66E	1	tetraspanin 18
1638520_at	Construct	0.000449712	nudE	nudE	1	nudE nuclear distribution gene E homolog 1 A. nid
1626581_s_at	Construct	0.00044977	CG1607	CG1607	1	solute carrier family 7 cationic amino acid trans
1637328_at	Construct	0.000449838	CG14782	CG14782	1	pleckstrin homology domain containing family F w
1640090_a_at	Construct	0.000449838	sluggish A	slgA	1	proline dehydrogenase oxidase 1
1640146_at	Construct	0.000449838	CG33116	CG33116	1	selenoprotein I
1634189_at	Construct	0.000450605	CG10338	CG10338	1	chromosome 16 open reading frame 58
1626769_s_at	Construct	0.000450728	CG1553	CG1553	1
1632429_at	Construct	0.000451102	Rab-protein 7	Rab7	1	RAB7 member RAS oncogene family
1634570_at	Construct	0.000451102	CG5375	CG5375	1
1633205_at	Construct	0.000452235	Dopamine transporter	DAT	1	solute carrier family 6 neurotransmitter transpor
1640892_a_at	Construct	0.000453656	Darkener of apricot	Doa	1	CDC-like kinase 2
1626820_at	Construct	0.000453882	CG5169	CG5169	1	serine threonine kinase 24 STE20 homolog yeast
1632384_at	Construct	0.000453882	NC2	NC2	1	down-regulator of transcription 1 TBP-binding ne
1623712_at	Construct	0.00045529	CG10132	CG10132	1
1634208_a_at	Construct	0.000455325	pollux	plx	1	TBC1 domain family member 4
1641697_at	Construct	0.000455544	NMDA receptor 1	Nmdar1	1	glutamate receptor ionotropic N-methyl D-asparta
1625885_at	Construct	0.000456368	Tubulin at 97EF	Tub97EF	1	similar to tubulin beta 8
1625922_a_at	Construct	0.000456497	CG10508	CG10508	1
1632712_s_at	Construct	0.00045828	CG17836	CG17836	1
1634453_at	Construct	0.00045828	garnet /// garnet /// g	g /// Danag /// Dpaig	1	adaptor-related protein complex 3 delta 1 subunit
1634961_s_at	Construct	0.00045828	Vha68-2	Vha68-2	1	ATPase H+ transporting lysosomal 70kDa V1 subun
1628824_s_at	Construct	0.000458307	lethal (1) G0060	l(1)G0060	1	integrator complex subunit 6
1627061_at	Construct	0.00046193	---	---	1
1640289_a_at	Construct	0.000462632	CG40439	CG40439	1
1641435_at	Construct	0.000462632	CG1371	CG1371	1	NODAL modulator 1
1633341_s_at	Construct	0.000463634	dachshund	dac	1
1626619_at	Construct	0.000463948	CG9919	CG9919	1
1633775_at	Construct	0.000464201	CG31665	CG31665	1
1640700_at	Construct	0.000464645	CG15514	CG15514	1
1623284_at	Construct	0.000465021	CG10251	CG10251	1
1627246_at	Construct	0.000465021	Pcaf	Pcaf	1	GCN5 general control of amino-acid synthesis 5-lik
1640856_at	Construct	0.000465021	CG14755	CG14755	1
1635863_at	Construct	0.000465099	CG7185	CG7185	1	cleavage and polyadenylation specific factor 6 68
1623553_a_at	Construct	0.000465263	Mitochondrial Rho	Miro	1	ras homolog gene family member T1
1629156_at	Construct	0.000465263	Tousled-like kinase	tlk	1
1628743_at	Construct	0.000466479	gliolectin	glec	1
1639771_at	Construct	0.000466892	c11.1	c11.1	1
1627838_at	Construct	0.000466919	unzipped	uzip	1
1638653_a_at	Construct	0.000466919	CG9932	CG9932	1
1630671_s_at	Construct	0.000467694	Patj	Patj	1	multiple PDZ domain protein
1632567_at	Construct	0.000468588	CG31342	CG31342	1
1634211_at	Construct	0.000468777	arrow	arr	1	low density lipoprotein receptor-related protein 6
1635638_s_at	Construct	0.000468777	tomosyn	tomosyn	1	syntaxin binding protein 5 tomosyn
1632813_at	Construct	0.000471604	CG11975	CG11975	1	WDR45-like
1628537_s_at	Construct	0.000472035	CG8368	CG8368	1
1633186_s_at	Construct	0.00047215	CG9153	CG9153	1	hect domain and RLD 4
1634942_at	Construct	0.00047215	CG5114	CG5114	1	angio-associated migratory cell protein
1638673_at	Construct	0.00047223	Adaptin	Bap	1	adaptor-related protein complex 1 beta 1 subunit
1640944_at	Construct	0.000475323	CG4577	CG4577	1
1631471_at	Construct	0.000475767	CG14889	CG14889	1
1625280_at	Construct	0.000476111	amontillado	amon	1	proprotein convertase subtilisin kexin type 2
1628319_s_at	Construct	0.000476122	sidekick	sdk	1	sidekick homolog 2 chicken
1628548_at	Construct	0.000477462	APC-like	Apc	1
1632550_at	Construct	0.000478796	unc-5	unc-5	1	unc-5 homolog B C. elegans
1630482_at	Construct	0.000479279	CG4161	CG4161	1
1633654_s_at	Construct	0.000479329	Inositol 1,4,5-triphosphate kinase 2	IP3K2	1	inositol 1 4 5-trisphosphate 3-kinase B
1625108_a_at	Construct	0.000479555	Lim3	Lim3	1	LIM homeobox 3
1630118_s_at	Construct	0.000481076	Dystrobrevin-like	Dyb	1	dystrobrevin beta
1633260_at	Construct	0.000481273	CG31715	CG31715	1	myotrophin
1629766_at	Construct	0.00048191	claret	ca	1
1624033_at	Construct	0.000483099	amyloid protein precursor-like	Appl	1	amyloid beta A4 precursor protein peptidase nex
1627615_at	Construct	0.000483099	---	---	1
1628275_at	Construct	0.000483365	Trithorax-like	Trl	1
1634311_at	Construct	0.000483769	CG14408	CG14408	1
1636911_at	Construct	0.000483967	jim	jim	1
1635399_s_at	Construct	0.000483999	CG11006	CG11006	1	Sin3A-associated protein 130kDa
1628788_a_at	Construct	0.0004841	dishevelled	dsh	1	dishevelled dsh homolog 3 Drosophila
1630784_a_at	Construct	0.000485374	CG9990	CG9990	1
1638690_at	Construct	0.000485838	CG5537	CG5537	1	hypothetical protein MGC23937 similar to CG4798
1629848_s_at	Construct	0.000485897	CG17184	CG17184	1	ADP-ribosylation factor interacting protein 2 arf
1623160_at	Construct	0.000486032	Matrix metalloproteinase 1	Mmp1	1	matrix metallopeptidase 14 membrane-inserted
1633198_a_at	Construct	0.000486095	Serotonin receptor 2	5-HT2	1	5-hydroxytryptamine serotonin receptor 2B
1640509_s_at	Construct	0.000486153	lamina ancestor	lama	1
1626113_at	Construct	0.00048639	CG4080	CG4080	1
1636092_a_at	Construct	0.00048639	wings apart-like	wapl	1
1637300_at	Construct	0.00048639	---	---	1
1631426_at	Construct	0.000487843	CG32412	CG32412	1	glutaminyl-peptide cyclotransferase glutaminyl cy
1639969_at	Construct	0.000488189	CG6969	CG6969	1
1630984_at	Construct	0.000490394	ATP synthase-	ATPsyn-	1	ATP synthase H+ transporting mitochondrial F1 co
1634912_at	Construct	0.000490532	modulo	mod	1
1631394_at	Construct	0.000490751	CG31324	CG31324	1
1637956_s_at	Construct	0.00049187	barentsz	btz	1	cancer susceptibility candidate 3
1633750_s_at	Construct	0.000491935	PNUTS	PNUTS	1	protein phosphatase 1 regulatory subunit 10
1637820_at	Construct	0.000492156	CG32677	CG32677	1
1627312_at	Construct	0.000493705	RpL12 /// Ribosomal protein L12	DyakRpL12 /// RpL12	1
1640679_at	Construct	0.000493884	CG8877	CG8877	1	PRP8 pre-mRNA processing factor 8 homolog S. cere
1640633_s_at	Construct	0.000494876	CG32425	CG32425	1
1634771_a_at	Construct	0.000495565	CG8184	CG8184	1	HECT UBA and WWE domain containing 1
1630519_at	Construct	0.000495782	Trip1	Trip1	1	eukaryotic translation initiation factor 3 subuni
1632073_at	Construct	0.000496702	CG8334	CG8334	1	ubiquitin specific peptidase 32
1637079_at	Construct	0.000496702	CG5098	CG5098	1
1634048_a_at	Construct	0.000496726	bubblegum	bgm	1	acyl-CoA synthetase bubblegum family member 2
1635810_at	Construct	0.000497261	CG7806	CG7806	1	ATP-binding cassette sub-family C CFTR MRP mem
1630476_s_at	Construct	0.000497423	nahoda	nahoda	1
1629795_at	Construct	0.000497566	Protein tyrosine phosphatase-ERK/Enhancer of Ras1	PTP-ER	1
1625532_at	Construct	0.000498481	crossveinless	cv	1	twisted gastrulation homolog 1 Drosophila
1623682_a_at	Construct	0.000499768	Calmodulin	Cam	1	calmodulin 2 phosphorylase kinase delta
1626874_at	Construct	0.000499904	Ecdysone-induced protein 63F 1	Eip63F-1	1
1624589_a_at	Construct	0.000500867	centaurin gamma 1A	cenG1A	1	centaurin gamma 2
1639135_at	Construct	0.000501041	GTP-binding protein	Gtp-bp	1	signal recognition particle receptor docking pro
1636868_at	Construct	0.000501074	CG14939	CG14939	1	chromosome 10 open reading frame 9
1630829_at	Construct	0.000501588	PIP5K59B	PIP5K59B	1	phosphatidylinositol-4-phosphate 5-kinase type I
1631612_at	Construct	0.000501588	CG17490	CG17490	1
1633931_a_at	Construct	0.000502487	Vacuolar H<up>+</up>-ATPase SFD subunit	VhaSFD	1	ATPase H+ transporting lysosomal 50 57kDa V1 su
1625921_at	Construct	0.00050277	---	---	1
1630358_at	Construct	0.000504366	CG2162	CG2162	1
1638131_s_at	Construct	0.000504366	Serotonin receptor 1A	5-HT1A	1	5-hydroxytryptamine serotonin receptor 1D
1640431_at	Construct	0.000505188	Inverted repeat-binding protein	Irbp	1	X-ray repair complementing defective repair in Chi
1624881_at	Construct	0.00050531	CG11448	CG11448	1	hypothetical protein FLJ39378
1624109_s_at	Construct	0.000505715	CG31522	CG31522	1
1636557_a_at	Construct	0.000505715	epsin-like	epsin-like	1
1622932_s_at	Construct	0.000505799	singed	sn	1	fascin homolog 1 actin-bundling protein Strongyl
1640015_at	Construct	0.000505799	CG7053	CG7053	1	chromosome 12 open reading frame 44
1629129_at	Construct	0.000507485	Tie-like receptor tyrosine kinase	Tie	1
1638803_at	Construct	0.000508092	RNA-binding protein 4F	Rnp4F	1	squamous cell carcinoma antigen recognised by T ce
1635349_a_at	Construct	0.000508355	nicotinic Acetylcholine Receptor beta 96A	nAcR96A	1	cholinergic receptor nicotinic beta 4
1627666_at	Construct	0.000508914	CG10979	CG10979	1
1632665_a_at	Construct	0.000508914	CG6340	CG6340	1	similar to splicing factor arginine serine-rich 4
1635518_at	Construct	0.000509396	no on or off transient A	nonA	1	splicing factor proline glutamine-rich polypyrimi
1627752_s_at	Construct	0.000509545	small conductance calcium-activated potassium channel	SK	1	potassium intermediate small conductance calcium-a
1630496_a_at	Construct	0.000510263	spellchecker1	spel1	1	mutS homolog 2 colon cancer nonpolyposis type 1
1636566_at	Construct	0.000510263	CG32368	CG32368	1
1635960_at	Construct	0.000510301	supernumerary limbs	slmb	1	beta-transducin repeat containing
1630399_at	Construct	0.00051127	Cad99C	Cad99C	1	protocadherin 15
1640190_at	Construct	0.000511655	Sac1	Sac1	1	SAC1 suppressor of actin mutations 1-like yeast
1628032_a_at	Construct	0.000512183	LpR2	LpR2	1	very low density lipoprotein receptor
1625218_at	Construct	0.000512871	CG11399	CG11399	1	chromosome 20 open reading frame 67
1626239_at	Construct	0.000514306	bonus	bon	1	tripartite motif-containing 33
1640204_at	Construct	0.000515543	CG31619	CG31619	1	ADAMTS-like 3
1626018_a_at	Construct	0.000517702	crooked legs	crol	1	zinc finger protein 84
1641381_s_at	Construct	0.000517702	CG13213	CG13213	1	F-box and leucine-rich repeat protein 6
1623487_at	Construct	0.000517846	dalmatian	dmt	1
1624854_s_at	Construct	0.000517846	Lissencephaly-1	Lis-1	1	platelet-activating factor acetylhydrolase isofor
1629705_at	Construct	0.000517846	CG6084	CG6084	1	aldo-keto reductase family 1 member B10 aldose r
1633535_at	Construct	0.000518185	VhaAC39	VhaAC39	1	ATPase H+ transporting lysosomal 38kDa V0 subun
1629285_at	Construct	0.000519053	CG9617	CG9617	1	SGT1 suppressor of G2 allele of SKP1 S. cerevisi
1629062_at	Construct	0.00052014	CG13252	CG13252	1
1630129_at	Construct	0.000520266	CG32355	CG32355	1
1632681_at	Construct	0.0005205	grain	grn	1	GATA binding protein 3
1635116_a_at	Construct	0.00052054	CG7518	CG7518	1
1636792_at	Construct	0.00052054	CG13278	CG13278	1
1625113_s_at	Construct	0.000520707	CG6509	CG6509	1	discs large homolog 5 Drosophila
1636064_at	Construct	0.000520707	CG2095	CG2095	1	exocyst complex component 4
1637015_s_at	Construct	0.000520707	ran	ran	1	RAN member RAS oncogene family
1630987_at	Construct	0.00052084	BG4	BG4	1
1623403_s_at	Construct	0.000521484	Casein kinase I	CkI	1	casein kinase 1 alpha 1
1627267_at	Construct	0.000521484	Misexpression suppressor of ras 3	MESR3	1
1630341_at	Construct	0.000523347	mushroom bodies tiny	mbt	1	p21 CDKN1A -activated kinase 7
1639264_at	Construct	0.00052415	Dead-box-1	Ddx1	1	DEAD Asp-Glu-Ala-Asp box polypeptide 1
1624396_at	Construct	0.000525263	CG7927	CG7927	1	transcription factor 25 basic helix-loop-helix
1627835_a_at	Construct	0.000525528	CG31973	CG31973	1
1624833_a_at	Construct	0.000525813	muscarinic Acetylcholine Receptor 60C	mAcR-60C	1	cholinergic receptor muscarinic 5
1626756_a_at	Construct	0.000525813	RhoGEF3	RhoGEF3	1
1640764_at	Construct	0.000525813	RNA polymerase II 215kD subunit	RpII215	1	polymerase RNA II DNA directed polypeptide A
1633681_at	Construct	0.000526217	CG2519	CG2519	1
1633714_at	Construct	0.000526836	eyes shut	eys	1
1640342_at	Construct	0.000528732	CG6234	CG6234	1
1634904_s_at	Construct	0.000529431	RhoGEF2	RhoGEF2	1
1640237_a_at	Construct	0.000530318	shuttle craft	stc	1	nuclear transcription factor X-box binding 1
1630911_s_at	Construct	0.000532731	eIF5	eIF5	1	eukaryotic translation initiation factor 5
1634150_s_at	Construct	0.000534543	Hormone-receptor-like in 78	Hr78	1	nuclear receptor subfamily 2 group C member 2
1626839_s_at	Construct	0.00053502	bloated tubules	blot	1
1630968_at	Construct	0.000536604	CG13907	CG13907	1	solute carrier family 16 member 14 monocarboxyli
1640747_s_at	Construct	0.00053837	CG8547	CG8547	1
1639024_at	Construct	0.000538977	CG9630	CG9630	1	DEAD Asp-Glu-Ala-Asp box polypeptide 55
1635578_at	Construct	0.000539181	CG31975	CG31975	1
1636199_at	Construct	0.000540527	dpr15	dpr15	1
1627996_a_at	Construct	0.000540814	Pi4KII	Pi4KII	1	phosphatidylinositol 4-kinase type II
1633382_s_at	Construct	0.00054106	CG8920	CG8920	1
1641673_at	Construct	0.000542132	CG8378	CG8378	1
1633081_at	Construct	0.000542191	lethal (1) G0196	l(1)G0196	1	Histidine acid phosphatase domain containing 1
1635659_at	Construct	0.000543282	crooked neck	crn	1	Crn crooked neck-like 1 Drosophila
1631573_a_at	Construct	0.000543596	wunen	wun	1	phosphatidic acid phosphatase type 2A
1633894_a_at	Construct	0.000543866	CG10543	CG10543	1
1633335_at	Construct	0.000544018	Son of sevenless	Sos	1	son of sevenless homolog 2 Drosophila
1632557_s_at	Construct	0.000544282	Rab30	Rab30	1	RAB30 member RAS oncogene family
1628146_at	Construct	0.0005443	crumbs	crb	1
1633100_a_at	Construct	0.0005443	Translocation protein 1	Trp1	1	translocation protein 1
1640066_at	Construct	0.000544384	CG1142	CG1142	1
1630992_at	Construct	0.000546463	CG7946	CG7946	1
1625833_at	Construct	0.000548117	CG9896	CG9896	1
1628628_at	Construct	0.000548117	Calpain-A	CalpA	1
1628888_at	Construct	0.000548117	CG7180	CG7180	1
1639657_at	Construct	0.000548855	---	---	1
1631137_at	Construct	0.000549934	viral IAP-associated factor	viaf	1	phosducin-like 3
1637853_a_at	Construct	0.000552546	Hyperkinetic	Hk	1	potassium voltage-gated channel shaker-related su
1635035_at	Construct	0.000552599	CG9384	CG9384	1	mannosyl alpha-1 3- -glycoprotein beta-1 4-N-acet
1640454_at	Construct	0.000552876	CG17273	CG17273	1	adenylosuccinate synthase like 1
1635354_at	Construct	0.000553444	CG31791	CG31791	1
1636806_at	Construct	0.000555295	Alpha 3 glucosyltransferase	Alg10	1
1623235_at	Construct	0.000555912	sec10	sec10	1	exocyst complex component 5
1638436_at	Construct	0.00055612	hugin	hug	1
1625814_at	Construct	0.000556302	CG8230	CG8230	1	dymeclin
1624113_at	Construct	0.000557112	CG7845	CG7845	1
1628049_at	Construct	0.000557268	CG15828	CG15828	1
1628306_at	Construct	0.000557268	tricornered	trc	1	serine threonine kinase 38 like
1630477_at	Construct	0.000557268	male-specific lethal 3	msl-3	1	male-specific lethal 3-like 1 Drosophila
1631051_at	Construct	0.000557268	CG9323	CG9323	1	DEAH Asp-Glu-Ala-His box polypeptide 36
1624577_at	Construct	0.000557762	Acetylcholine esterase	Ace	1
1640534_s_at	Construct	0.000558004	Calcium/calmodulin-dependent protein kinase II	CaMKII	1	calcium calmodulin-dependent protein kinase CaM k
1633964_at	Construct	0.000558062	CG3626	CG3626	1	pyruvate dehydrogenase phosphatase regulatory subu
1624122_a_at	Construct	0.000559641	Rapgap1	Rapgap1	1	RAP1 GTPase activating protein
1639259_at	Construct	0.000560918	lethal (2) k14708	l(2)k14708	1
1638770_a_at	Construct	0.000561816	centaurin beta 1A	cenB1A	1	centaurin beta 2
1635007_at	Construct	0.000562131	Sulfated	Sulf1	1	sulfatase 1
1632570_at	Construct	0.000562408	CG2052	CG2052	1
1634934_at	Construct	0.000562408	CG8765	CG8765	1
1635079_at	Construct	0.000562408	CG1550	CG1550	1	tubulin tyrosine ligase-like family member 12
1637892_at	Construct	0.000562408	CG12594	CG12594	1
1639909_at	Construct	0.000562408	CG7058	CG7058	1
1625431_at	Construct	0.000563267	reversed polarity	repo	1
1638455_at	Construct	0.000563806	---	---	1
1630201_a_at	Construct	0.000564046	CG11321	CG11321	1
1635182_at	Construct	0.000564141	warts	wts	1	LATS large tumor suppressor homolog 1 Drosophil
1635258_s_at	Construct	0.000564141	---	---	1
1635803_s_at	Construct	0.000564141	brother of odd with entrails limited	bowl	1
1640891_at	Construct	0.000564141	CG3003	CG3003	1
1641303_at	Construct	0.000564141	egalitarian	egl	1
1638345_at	Construct	0.000564511	folded gastrulation	fog	1
1625072_s_at	Construct	0.00056501	Ac3	Ac3	1	adenylate cyclase 3
1633556_s_at	Construct	0.000565394	Daughters against dpp	Dad	1	SMAD mothers against DPP homolog 7 Drosophila
1641603_s_at	Construct	0.000567494	CG9611	CG9611	1	leucine rich repeat containing 40
1639186_at	Construct	0.000567906	CG7918	CG7918	1
1639773_s_at	Construct	0.000569372	G protein 49B	G49B	1	guanine nucleotide binding protein G protein q
1630531_at	Construct	0.000569461	RhoGAP93B	RhoGAP93B	1
1630596_at	Construct	0.000569497	CG14643	CG14643	1
1624766_s_at	Construct	0.00057029	Dorsal switch protein 1	Dsp1	1	high-mobility group box 1
1633005_at	Construct	0.00057029	CG6903	CG6903	1	Heparan-alpha-glucosaminide N-acetyltransferase
1630938_a_at	Construct	0.000570605	CG14879	CG14879	1
1630079_at	Construct	0.000572388	Another transcription unit	Atu	1	Leo1 Paf1 RNA polymerase II complex component ho
1630841_at	Construct	0.000572388	CG8668	CG8668	1	UDP-Gal:betaGlcNAc beta 1 3-galactosyltransferase
1629280_at	Construct	0.000572447	CG12344	CG12344	1
1639309_at	Construct	0.000572447	CG12333	CG12333	1	WD repeat domain 37
1626570_s_at	Construct	0.000573831	SNF4/AMP-activated protein kinase gamma subunit	SNF4A	1	protein kinase AMP-activated gamma 1 non-catalyt
1634291_at	Construct	0.000573831	CG11814	CG11814	1
1636164_s_at	Construct	0.000574217	CG3107	CG3107	1	pitrilysin metallopeptidase 1
1632130_s_at	Construct	0.000575283	SRPK	SRPK	1	SFRS protein kinase 2
1631385_at	Construct	0.000576799	CG2889	CG2889	1
1640433_a_at	Construct	0.000578534	toutatis	tou	1
1627694_at	Construct	0.000578891	CG9715	CG9715	1
1632858_a_at	Construct	0.000579426	Xe7	Xe7	1	DNA segment on chromosome X and Y unique 155 exp
1631106_s_at	Construct	0.00057961	Isoleucyl-tRNA synthetase	Aats-ile	1	isoleucine-tRNA synthetase
1623827_a_at	Construct	0.000579612	frazzled	fra	1
1632908_s_at	Construct	0.000579649	Lerp	Lerp	1	insulin-like growth factor 2 receptor
1623087_at	Construct	0.000581092	Guanine nucleotide exchange factor GEF64C	Gef64C	1
1632373_s_at	Construct	0.000581323	CG34015	CG34015	1	histidine triad nucleotide binding protein 3
1635238_s_at	Construct	0.000583853	Myosin binding subunit	Mbs	1
1632907_a_at	Construct	0.000583993	CG13204	CG13204	1
1639398_at	Construct	0.000583993	Hormone receptor-like in 96	Hr96	1	vitamin D 1 25- dihydroxyvitamin D3 receptor
1635031_s_at	Construct	0.000584019	CG11147	CG11147	1
1625537_at	Construct	0.000584185	CG3655	CG3655	1
1625176_at	Construct	0.000584825	CG33174	CG33174	1	chromosome 11 open reading frame 11
1628416_s_at	Construct	0.000584971	Dodeca-satellite-binding protein 1	Dp1	1	high density lipoprotein binding protein vigilin
1623673_at	Construct	0.000586424	CG10435	CG10435	1
1626169_at	Construct	0.000586424	CG2701	CG2701	1	activating signal cointegrator 1 complex subunit 2
1633911_a_at	Construct	0.000586424	CG31550	CG31550	1
1624064_at	Construct	0.000586675	CG9915	CG9915	1	IWS1 homolog S. cerevisiae
1639483_s_at	Construct	0.000586675	Neprilysin 1	Nep1	1	endothelin converting enzyme 2
1624639_at	Construct	0.000586703	CG1420	CG1420	1	step II splicing factor SLU7
1628155_at	Construct	0.000586778	klarsicht	klar	1
1636887_s_at	Construct	0.000587075	CG11247	CG11247	1
1634978_at	Construct	0.000587188	CG13117	CG13117	1
1638504_s_at	Construct	0.000587274	---	---	1
1638724_at	Construct	0.000589893	CG18507	CG18507	1
1631417_s_at	Construct	0.0005899	CG6282	CG6282	1
1632272_a_at	Construct	0.0005899	Moca-cyp /// Moca-cyp	Moca-cyp /// DyakMoca-cyp	1
1637750_at	Construct	0.000590429	Sox21b	Sox21b	1
1641304_s_at	Construct	0.000590819	CG9801	CG9801	1
1633649_s_at	Construct	0.000590857	trp-like	trpl	1
1624233_at	Construct	0.000592057	Gustatory receptor 8a	Gr8a	1
1627494_s_at	Construct	0.000592057	out at first	oaf	1	OAF homolog Drosophila
1630000_at	Construct	0.000592677	CG7358	CG7358	1
1633768_at	Construct	0.000593302	CG31814	CG31814	1
1634549_at	Construct	0.000595519	CG11750	CG11750	1
1622949_at	Construct	0.000595964	pebbled	peb	1
1626379_a_at	Construct	0.000596736	CG17490	CG17490	1
1639283_at	Construct	0.00059714	---	---	1
1624574_at	Construct	0.000597797	CG14656	CG14656	1
1628986_at	Construct	0.000598087	gp210	gp210	1	nucleoporin 210kDa
1629868_s_at	Construct	0.000598122	CG3838	CG3838	1
1626638_at	Construct	0.000598557	escl	escl	1	embryonic ectoderm development
1632819_at	Construct	0.000598557	CG31224	CG31224	1
1623565_at	Construct	0.000599189	CG17278	CG17278	1
1628930_at	Construct	0.000599189	swi2	swi2	1
1639721_at	Construct	0.000599189	CG1826	CG1826	1	BTB POZ domain containing 9
1637410_s_at	Construct	0.000600394	lethal (2) giant larvae	l(2)gl	1	lethal giant larvae homolog 1 Drosophila
1633729_a_at	Construct	0.000603031	Eps-15	Eps-15	1	epidermal growth factor receptor pathway substrate
1628809_at	Construct	0.000603441	D19B	D19B	1
1633061_at	Construct	0.000604114	Mgat2	Mgat2	1	mannosyl alpha-1 6- -glycoprotein beta-1 2-N-acet
1636608_at	Construct	0.000604215	CG32843	CG32843	1	calcitonin receptor-like
1634403_at	Construct	0.000604526	Adaptin	Adaptin	1	adaptor-related protein complex 2 alpha 2 subunit
1634028_s_at	Construct	0.000605547	Fmr1	Fmr1	1	fragile X mental retardation autosomal homolog 1
1640496_at	Construct	0.000607154	Niemann-Pick Type C-1	NPC1	1	Niemann-Pick disease type C1
1631046_s_at	Construct	0.000609622	CG6448	CG6448	1
1630825_at	Construct	0.000611039	CG5798	CG5798	1	Ubiquitin specific peptidase 8
1636035_at	Construct	0.000611584	beaten path IIa	beat-IIa	1
1623874_at	Construct	0.000611642	CG14215	CG14215	1
1629874_at	Construct	0.000611642	Kif3C	Kif3C	1	kinesin family member 17
1635713_at	Construct	0.000611642	CG13185	CG13185	1	MDN1 midasin homolog yeast
1639490_at	Construct	0.000611642	Rim	Rim	1
1640145_at	Construct	0.000611642	by S6	bys	1	bystin-like
1626336_at	Construct	0.000613266	Defense repressor 1	Dnr1	1	myosin regulatory light chain interacting protein
1631090_a_at	Construct	0.000613266	CG9795	CG9795	1
1640291_at	Construct	0.000613266	CG11848	CG11848	1	FKSG44 gene
1633403_at	Construct	0.00061374	Suppressor of Cytokine Signaling at 44A	Socs44A	1	suppressor of cytokine signaling 6
1636240_at	Construct	0.000614768	CG7678	CG7678	1
1625859_at	Construct	0.000615565	CTP:phosphocholine cytidylyltransferase 2	Cct2	1	phosphate cytidylyltransferase 1 choline beta
1626483_at	Construct	0.000615683	Glued	Gl	1	dynactin 1 p150 glued homolog Drosophila
1628264_a_at	Construct	0.00061614	homolog of RecQ	RecQ5	1	RecQ protein-like 5
1624607_at	Construct	0.000617685	---	---	1
1635117_at	Construct	0.000618214	fused	fu	1
1635248_at	Construct	0.000619209	CG17144	CG17144	1
1637771_s_at	Construct	0.000619391	CG7220	CG7220	1	ubiquitin-conjugating enzyme E2W putative
1638558_a_at	Construct	0.000619391	Synapse protein 25	Snap25	1
1640259_at	Construct	0.000619391	lethal (2) 35Bb	l(2)35Bb	1
1640781_a_at	Construct	0.000619391	Ecdysone-induced protein 75B	Eip75B	1	nuclear receptor subfamily 1 group D member 1
1627441_at	Construct	0.000619444	Tyramine receptor	TyrR	1	5-hydroxytryptamine serotonin receptor 1A
1628276_s_at	Construct	0.000620777	Basigin	Bsg	1
1628947_s_at	Construct	0.000621616	minidiscs	mnd	1	solute carrier family 7 cationic amino acid trans
1641309_s_at	Construct	0.000621624	Imitation SWI	Iswi	1	SWI SNF related matrix associated actin dependen
1628419_a_at	Construct	0.000623013	CG8909	CG8909	1	low density lipoprotein receptor-related protein 4
1632067_at	Construct	0.000623198	Ect4	Ect4	1
1640867_s_at	Construct	0.000623449	heartless	htl	1	fibroblast growth factor receptor 3 achondroplasi
1627087_at	Construct	0.000623809	CG14805	CG14805	1	WD repeat domain 18
1625414_at	Construct	0.000624257	infertile crescent	ifc	1	degenerative spermatocyte homolog 1 lipid desatur
1628955_at	Construct	0.000624257	Ance-3	Ance-3	1
1630024_at	Construct	0.000624257	Mediator complex subunit 24	MED24	1	thyroid hormone receptor associated protein 4
1637666_at	Construct	0.000624257	CG15651	CG15651	1	fukutin related protein
1627530_at	Construct	0.000625051	CG6700	CG6700	1	leukocyte receptor cluster LRC member 8
1640945_at	Construct	0.000625417	longitudinals lacking	lola	1
1635203_at	Construct	0.000625963	Dorsal interacting protein 2	Dip2	1
1623873_at	Construct	0.000626	Stromal interaction molecule /// Ranbp16	Stim /// Ranbp16	1	stromal interaction molecule 1
1629871_at	Construct	0.000626457	CG11665	CG11665	1
1637943_at	Construct	0.000626457	held out wings	how	1	quaking homolog KH domain RNA binding mouse
1633524_a_at	Construct	0.000629972	Calpain-A	CalpA	1
1628385_a_at	Construct	0.000630141	Myocyte enhancing factor 2	Mef2	1	MADS box transcription enhancer factor 2 polypept
1640080_at	Construct	0.000630546	CG9253	CG9253	1	DEAD Asp-Glu-Ala-Asp box polypeptide 47
1635440_at	Construct	0.000630613	---	---	1
1633191_at	Construct	0.000630673	---	---	1
1635325_a_at	Construct	0.000631167	GTPase-activating protein 1	Gap1	1	RAS p21 protein activator 3
1624248_s_at	Construct	0.000632091	Adult enhancer factor 1	Aef1	1
1627763_at	Construct	0.000632475	CG31048	CG31048	1	dedicator of cytokinesis 3
1626135_s_at	Construct	0.000632881	CG14476	CG14476	1	glucosidase alpha neutral AB
1627478_at	Construct	0.000632881	CG33232	CG33232	1	supervillin
1635187_s_at	Construct	0.000632881	CG1646	CG1646	1	PRP39 pre-mRNA processing factor 39 homolog S. ce
1628438_at	Construct	0.000633341	CG9044	CG9044	1
1630063_a_at	Construct	0.000633543	Eukaryotic initiation factor 3 p66 subunit	eIF-3p66	1	eukaryotic translation initiation factor 3 subuni
1624299_at	Construct	0.00063367	---	---	1
1625620_a_at	Construct	0.000634162	Sex lethal	Sxl	1
1641657_s_at	Construct	0.000634264	CG12424	CG12424	1
1623932_at	Construct	0.0006345	Equilibrative nucleoside transporter 3	Ent3	1	solute carrier family 29 nucleoside transporters
1635057_s_at	Construct	0.000635988	CG15445	CG15445	1
1636182_a_at	Construct	0.000636038	CG10948	CG10948	1	proliferation-inducing protein 38
1624807_at	Construct	0.000636391	CG5629	CG5629	1	phosphopantothenoylcysteine synthetase
1632497_a_at	Construct	0.00063661	Grunge	Gug	1	arginine-glutamic acid dipeptide RE repeats
1637412_a_at	Construct	0.00063661	stranded at second	sas	1
1637917_s_at	Construct	0.00063661	tramtrack	ttk	1
1638247_at	Construct	0.000637598	CG17065	CG17065	1	amidohydrolase domain containing 2
1641600_at	Construct	0.000637598	Ribosomal protein L24	RpL24	1	ribosomal protein L24
1626561_at	Construct	0.00063816	CG7692	CG7692	1
1629659_s_at	Construct	0.000638269	polyA-binding protein	pAbp	1	poly A binding protein cytoplasmic 1
1628248_at	Construct	0.000639827	Sex comb on midleg	Scm	1
1633773_s_at	Construct	0.000639827	Keap1	Keap1	1	kelch-like ECH-associated protein 1
1622945_a_at	Construct	0.000640055	Lysyl-tRNA synthetase	Aats-lys	1	lysyl-tRNA synthetase
1641120_at	Construct	0.000640734	CG13506	CG13506	1
1628336_a_at	Construct	0.000641429	Lachesin	Lac	1
1634906_at	Construct	0.000641665	Tubulin at 84D /// Tropomyosin 1	Tub84D /// Tm1	1	alpha-tubulin isotype H2-alpha
1629933_at	Construct	0.00064238	Sas10	Sas10	1	disrupter of silencing 10
1639509_at	Construct	0.00064256	Nnp-1	Nnp-1	1	DNA segment on chromosome 21 unique 2056 express
1638260_s_at	Construct	0.00064282	CG2269	CG2269	1
1634613_s_at	Construct	0.000643314	CG40002	CG40002	1
1625724_at	Construct	0.000644257	Phosphodiesterase 1c	Pde1c	1	phosphodiesterase 1C calmodulin-dependent 70kDa
1630130_at	Construct	0.000645542	CG4404	CG4404	1
1640258_at	Construct	0.000646253	---	---	1
1629145_at	Construct	0.000647215	HERC2	HERC2	1	hect domain and RLD 2
1636320_at	Construct	0.000647597	Arp11	Arp11	1	actin-related protein 10 homolog S. cerevisiae
1624530_at	Construct	0.000648411	RhoBTB	RhoBTB	1	Rho-related BTB domain containing 1
1630372_s_at	Construct	0.000648448	---	---	1
1633422_a_at	Construct	0.000649033	longitudinals lacking	lola	1
1638043_a_at	Construct	0.000649742	CG3530	CG3530	1	myotubularin related protein 7
1626470_at	Construct	0.000649779	CG10440	CG10440	1	potassium channel tetramerisation domain containin
1627326_a_at	Construct	0.000650077	CG6860	CG6860	1	leucine-rich repeats and calponin homology CH do
1634604_at	Construct	0.000650254	mitotic 15	mit(1)15	1
1636391_at	Construct	0.000651575	CG15609	CG15609	1	EH domain binding protein 1
1627525_a_at	Construct	0.000651742	Ero1L	Ero1L	1	ERO1-like S. cerevisiae
1628985_a_at	Construct	0.000651843	Calcium/calmodulin-dependent protein kinase	Caki	1	calcium calmodulin-dependent serine protein kinase
1631875_at	Construct	0.000652244	CG1172	CG1172	1	ubiquitin domain containing 1
1626523_a_at	Construct	0.000654379	Glutamyl-prolyl-tRNA synthetase	Aats-glupro	1	glutamyl-prolyl-tRNA synthetase
1636134_at	Construct	0.000654379	Odorant receptor 83b	Or83b	1
1626172_at	Construct	0.000655291	CG12187	CG12187	1
1635078_at	Construct	0.000656246	CG10617	CG10617	1
1632303_a_at	Construct	0.000657192	Trc8	Trc8	1	ring finger protein 139
1640309_s_at	Construct	0.000657192	TBP-associated factor 4	Taf4	1	TAF4b RNA polymerase II TATA box binding protein
1629745_at	Construct	0.000657383	CG6439	CG6439	1	isocitrate dehydrogenase 3 NAD+ beta
1624719_at	Construct	0.000658402	CG10777	CG10777	1	DEAD Asp-Glu-Ala-Asp box polypeptide 17
1625165_at	Construct	0.000660295	CG17187	CG17187	1	DnaJ Hsp40 homolog subfamily C member 17
1639392_at	Construct	0.000660598	lethal (2) 09851 /// lethal (2) 09851	l(2)09851 /// Dyakl(2)09851	1	glutamate-rich WD repeat containing 1
1628263_s_at	Construct	0.000662265	CG15236	CG15236	1
1633415_at	Construct	0.00066249	dpr18	dpr18	1
1630393_a_at	Construct	0.000662948	Hepatocyte growth factor regulated tyrosine kinase substrate	Hrs	1	hepatocyte growth factor-regulated tyrosine kinase
1624533_s_at	Construct	0.00066319	trithorax	trx	1
1636299_at	Construct	0.00066319	CG4707	CG4707	1
1635848_at	Construct	0.000663697	Inos	Inos	1	myo-inositol 1-phosphate synthase A1
1629943_at	Construct	0.000667719	CG7112	CG7112	1	RAB GTPase activating protein 1
1637077_s_at	Construct	0.000667719	CG3777	CG3777	1
1624243_at	Construct	0.000668439	CG9265	CG9265	1	dehydrogenase reductase SDR family member 8
1627129_at	Construct	0.000668439	---	---	1
1627295_s_at	Construct	0.000668439	Cyclin D	CycD	1	cyclin D2
1631334_at	Construct	0.000669145	CG10260	CG10260	1	phosphatidylinositol 4-kinase catalytic alpha po
1640169_s_at	Construct	0.000669872	Heterogeneous nuclear ribonucleoprotein at 98DE	Hrb98DE	1	heterogeneous nuclear ribonucleoprotein A3
1626059_at	Construct	0.000670788	knirps-like	knrl	1
1636881_at	Construct	0.000671046	CG32547	CG32547	1
1629010_at	Construct	0.000671319	rhomboid-5	rho-5	1
1630416_at	Construct	0.000672064	kin17	kin17	1	KIN antigenic determinant of recA protein homolog
1632319_at	Construct	0.000672121	CG18598	CG18598	1
1634053_at	Construct	0.000672475	CG8408	CG8408	1	transmembrane protein 41B
1630423_at	Construct	0.00067314	CG4996	CG4996	1	hypothetical protein LOC55610 isoform b
1639816_at	Construct	0.000673447	Chromodomain-helicase-DNA-binding protein	Chd1	1	chromodomain helicase DNA binding protein 2
1623820_at	Construct	0.000673805	CG12252	CG12252	1	CTD carboxy-terminal domain RNA polymerase II p
1626448_at	Construct	0.000673805	Spt5	Spt5	1	suppressor of Ty 5 homolog S. cerevisiae
1631993_s_at	Construct	0.000673805	Aldolase	Ald	1
1634944_at	Construct	0.000673805	lethal (2) tumorous imaginal discs	l(2)tid	1	DnaJ Hsp40 homolog subfamily A member 3
1635738_at	Construct	0.000673805	Cyclic-nucleotide-gated ion channel protein	Cng	1	cyclic nucleotide gated channel alpha 3
1632109_s_at	Construct	0.000673912	coatomer protein	Cop	1	coatomer protein complex subunit alpha
1640627_at	Construct	0.000674315	dachsous	ds	1	dachsous 1 Drosophila
1629996_at	Construct	0.000675044	CG11910	CG11910	1
1636221_a_at	Construct	0.000675044	thickveins	tkv	1	bone morphogenetic protein receptor type IA
1625367_at	Construct	0.000675294	CG9448	CG9448	1	zinc finger RAN-binding domain containing 1
1626968_at	Construct	0.000675294	CG7207	CG7207	1	collagen type IV alpha 3 Goodpasture antigen b
1636345_s_at	Construct	0.000675294	synaptotagmin	syt	1	synaptotagmin I
1623100_at	Construct	0.000676879	Aac11	Aac11	1	apoptosis inhibitor 5
1641532_at	Construct	0.000677778	TH1	TH1	1	TH1-like Drosophila
1623590_s_at	Construct	0.000677817	Smc5	Smc5	1	structural maintenance of chromosomes 5
1635692_s_at	Construct	0.000679048	Trehalase	Treh	1	trehalase brush-border membrane glycoprotein
1641063_s_at	Construct	0.000679113	Organic anion transporting polypeptide 30B	Oatp30B	1	solute carrier organic anion transporter family m
1641068_a_at	Construct	0.000680622	spatzle	spz	1
1624489_a_at	Construct	0.000681374	CG11596	CG11596	1	chromosome 9 open reading frame 41
1623212_s_at	Construct	0.000682026	tamo	tamo	1
1633489_at	Construct	0.000684888	beaten path Ic	beat-Ic	1
1632256_at	Construct	0.000685411	TBP-associated factor 1	Taf1	1	TAF1 RNA polymerase II TATA box binding protein
1639115_s_at	Construct	0.000685586	rho-type guanine exchange factor	rtGEF	1	Rho guanine nucleotide exchange factor GEF 7
1634870_at	Construct	0.000686203	CG13031	CG13031	1
1638857_at	Construct	0.00068631	CG3605	CG3605	1	splicing factor 3b subunit 2 145kDa
1632477_s_at	Construct	0.000687147	CG31708	CG31708	1
1627218_a_at	Construct	0.00068728	CG7646	CG7646	1
1624863_a_at	Construct	0.000687941	CG8042	CG8042	1	UBX domain containing 2
1628552_at	Construct	0.000688511	CG7156	CG7156	1	ribosomal protein S6 kinase 52kDa polypeptide 1
1639555_at	Construct	0.000689211	CG17724	CG17724	1
1627533_at	Construct	0.000689315	CG12295	CG12295	1	calcium channel voltage-dependent alpha 2 delta
1633986_at	Construct	0.000689817	CG5466	CG5466	1
1628462_s_at	Construct	0.000691025	RhoGAP1A	RhoGAP1A	1
1624923_s_at	Construct	0.000691727	---	---	1
1636219_at	Construct	0.000691898	Adenylyl cyclase 35C	Ac13E	1	adenylate cyclase 9
1633940_at	Construct	0.000693177	CG9393	CG9393	1	metaxin 1
1633115_a_at	Construct	0.000693373	C3G	C3G	1	Rap guanine nucleotide exchange factor GEF 1
1625004_at	Construct	0.00069453	CG18811	CG18811	1	GPI-anchored membrane protein 1
1628915_s_at	Construct	0.000694834	CG3799	CG3799	1	neuronal guanine nucleotide exchange factor
1632309_at	Construct	0.000697158	Angelman syndrome	As	1	ubiquitin protein ligase E3A human papilloma viru
1638183_at	Construct	0.000697329	CG13868	CG13868	1
1634340_at	Construct	0.000697739	CG11970	CG11970	1	nuclear factor related to kappaB binding protein
1637692_at	Construct	0.000698402	---	---	1
1633447_at	Construct	0.000700571	Multiple C2 domain and transmembrane region protein	Mctp	1	multiple C2 domains transmembrane 2
1627209_at	Construct	0.000701414	mRNA-capping-enzyme	mRNA-capping-enzyme	1	RNA guanylyltransferase and 5 -phosphatase
1627641_s_at	Construct	0.000701761	CG17494	CG17494	1
1626738_at	Construct	0.000702346	CG4644	CG4644	1	polymerase RNA mitochondrial DNA directed
1633269_at	Construct	0.000702593	CG9140	CG9140	1	NADH dehydrogenase ubiquinone flavoprotein 1 51
1635173_at	Construct	0.000703556	polypeptide GalNAc transferase 5	pgant5	1	UDP-N-acetyl-alpha-D-galactosamine:polypeptide N-a
1634031_at	Construct	0.000704389	Bestrophin 2	Best2	1
1633515_s_at	Construct	0.000706071	archipelago	ago	1
1640734_a_at	Construct	0.000706408	CG16718	CG16718	1	transmembrane protein 16A
1640061_at	Construct	0.000706422	---	---	1
1624850_at	Construct	0.000708016	CG3556	CG3556	1
1629123_at	Construct	0.000708956	spastin	spas	1	spastin
1634037_s_at	Construct	0.000708956	Sequence-specific single-stranded DNA-binding protein	Ssdp	1	single stranded DNA binding protein 3
1632007_at	Construct	0.000708989	CG7492	CG7492	1
1641669_a_at	Construct	0.000709944	CG7757	CG7757	1	PRP3 pre-mRNA processing factor 3 homolog S. cere
1632023_s_at	Construct	0.000710117	CG1909	CG1909	1	receptor-associated protein of the synapse 43kD
1632841_x_at	Construct	0.000710117	Heat-shock-protein-70Bc	Hsp70Bc	1	heat shock 70kDa protein 2
1641704_at	Construct	0.000710117	---	---	1
1632515_a_at	Construct	0.000710971	CG18619	CG18619	1	cAMP responsive element binding protein-like 2
1624889_a_at	Construct	0.000711284	lethal (2) k16918	l(2)k16918	1
1626768_at	Construct	0.000713258	CG7044	CG7044	1
1634077_at	Construct	0.000713358	CG4789	CG4789	1	RAB member of RAS oncogene family-like 3
1628689_at	Construct	0.000715525	CG17211	CG17211	1
1640200_at	Construct	0.000715903	dystrophin	Dys	1	dystrophin muscular dystrophy Duchenne and Becke
1628412_at	Construct	0.000716281	Adenylyl cyclase 78C	Ac78C	1	adenylate cyclase 8 brain
1623478_at	Construct	0.000717605	CG16752	CG16752	1
1632403_at	Construct	0.000717605	CG12263	CG12263	1	phosphatidylinositol glycan anchor biosynthesis c
1639500_at	Construct	0.000718534	nubbin	nub	1	POU domain class 2 transcription factor 1
1639591_at	Construct	0.000718668	CG13489	CG13489	1
1630186_at	Construct	0.000723745	CG13743	CG13743	1	hypothetical protein FLJ39822
1628914_at	Construct	0.000724935	CG3194	CG3194	1	UDP-glucuronic acid epimerase
1637188_s_at	Construct	0.000725135	CG30492	CG30492	1
1634983_s_at	Construct	0.000728087	CG32521	CG32521	1
1637286_a_at	Construct	0.000728852	raw	raw	1
1628666_at	Construct	0.000729521	CG3328	CG3328	1	chromosome 11 open reading frame 9
1638883_at	Construct	0.000729946	CG8636	CG8636	1
1633777_at	Construct	0.000730295	CG11221	CG11221	1
1638186_a_at	Construct	0.000730295	CG9025 /// GA21487	CG9025 /// DpseGA21487	1	fem-1 homolog b C. elegans
1636945_at	Construct	0.000732222	Protein phosphatase V	PpV	1	protein phosphatase 6 catalytic subunit
1637085_at	Construct	0.000732278	Cyclin-dependent kinase 5	Cdk5	1	cyclin-dependent kinase 5
1637307_at	Construct	0.000733781	CG31694	CG31694	1	interferon-related developmental regulator 2
1640669_at	Construct	0.000733901	CG17163	CG17163	1
1641735_at	Construct	0.00073391	CG16908	CG16908	1	KIAA0406
1628450_at	Construct	0.000736569	Neuropeptide-like precursor 1	Nplp1	1
1626898_at	Construct	0.000739113	CG4751	CG4751	1	hypothetical protein FLJ14981
1630946_at	Construct	0.000739113	---	---	1
1630584_at	Construct	0.000739375	CG10657	CG10657	1
1638609_s_at	Construct	0.000739375	MBD-R2	MBD-R2	1
1640698_at	Construct	0.000739375	CG8814	CG8814	1	acyl-Coenzyme A binding domain containing 5
1641398_s_at	Construct	0.000740209	Lamin B receptor	LBR	1
1641666_at	Construct	0.000740209	---	---	1
1632098_at	Construct	0.000743484	CG4364	CG4364	1	pescadillo homolog 1 containing BRCT domain zebr
1641048_a_at	Construct	0.000743484	toucan	toc	1
1629446_at	Construct	0.000743906	CG1136	CG1136	1
1636098_at	Construct	0.000745885	CG5144	CG5144	1
1640417_a_at	Construct	0.000745885	Protein kinase related to protein kinase N	Pkn	1	protein kinase N2
1623384_at	Construct	0.00074592	yantar	ytr	1	putative nucleic acid binding protein RY-1
1626478_at	Construct	0.000746115	CG12340	CG12340	1
1641211_at	Construct	0.00074759	Chorion protein b at 7F	Cp7Fb	1
1640857_at	Construct	0.000748361	CG10208	CG10208	1
1623252_a_at	Construct	0.000748522	lethal (1) G0030	l(1)G0030	1	citrate synthase
1638708_s_at	Construct	0.000749212	CG33324 /// grappa	CG33324 /// gpp	1
1627716_at	Construct	0.000749333	CG11598	CG11598	1
1637007_s_at	Construct	0.000750098	CG5445	CG5445	1
1638996_at	Construct	0.000751061	CG11727	CG11727	1	ecotropic viral integration site 5
1624572_a_at	Construct	0.000751091	Mediator complex subunit 21	MED21	1
1631614_at	Construct	0.000751849	CG5190	CG5190	1
1633815_at	Construct	0.000752002	CG31191	CG31191	1
1623036_a_at	Construct	0.00075442	CG10249	CG10249	1
1627859_at	Construct	0.000755298	CG31646	CG31646	1	neurotrimin
1633356_s_at	Construct	0.000755298	nicotinic Acetylcholine Receptor alpha 96Ab	nAcR96Ab	1	cholinergic receptor nicotinic alpha 2 neuronal
1628005_at	Construct	0.000755718	CG31666	CG31666	1
1624772_at	Construct	0.00075672	CG14186	CG14186	1
1625574_at	Construct	0.00075672	Nitric oxide synthase	Nos	1	nitric oxide synthase 1 neuronal
1634712_s_at	Construct	0.00075672	CLIP-190	CLIP-190	1	restin Reed-Steinberg cell-expressed intermediate
1639138_at	Construct	0.00075672	CG5524	CG5524	1	structural maintenance of chromosomes 6
1628149_a_at	Construct	0.000757142	Pak3	Pak3	1
1638197_at	Construct	0.000757462	CG3573	CG3573	1	inositol polyphosphate-5-phosphatase 75kDa
1635144_at	Construct	0.000758588	klingon	klg	1	neuronal growth regulator 1
1632821_a_at	Construct	0.000759776	CG3287	CG3287	1
1641329_at	Construct	0.000759776	CG7282	CG7282	1
1641368_at	Construct	0.000759776	General receptor for phosphoinositides 1	Grp1	1	pleckstrin homology Sec7 and coiled-coil domains
1625018_at	Construct	0.00076004	CG32827	CG32827	1
1640030_at	Construct	0.00076042	CG4168	CG4168	1
1625779_at	Construct	0.000762524	forkhead domain 59A	fd59A	1
1637987_at	Construct	0.000762701	CG10192	CG10192	1
1628938_at	Construct	0.000764946	CG10882	CG10882	1	SEC24 related gene family member C S. cerevisiae
1631704_at	Construct	0.000765021	CG5805	CG5805	1	KIAA0446 gene product
1636837_at	Construct	0.000765021	CG32177	CG32177	1	Nedd4 family interacting protein 2
1627122_at	Construct	0.000765306	CG32767	CG32767	1
1632637_at	Construct	0.000767255	highwire	hiw	1	MYC binding protein 2
1639985_s_at	Construct	0.000768122	Clathrin heavy chain	Chc	1	clathrin heavy polypeptide Hc
1639611_at	Construct	0.000770453	CG8709	CG8709	1	lipin 2
1632361_at	Construct	0.000771365	real-time	retm	1	SEC14-like 5 S. cerevisiae
1641718_at	Construct	0.000772014	CG1427	CG1427	1	soluble liver antigen liver pancreas antigen
1636088_at	Construct	0.000773231	Distal-less	Dll	1	distal-less homeobox 1
1630248_at	Construct	0.000773858	CG5346	CG5346	1
1624175_at	Construct	0.000777239	caupolican	caup	1
1638100_s_at	Construct	0.00077777	Ptpmeg	Ptpmeg	1	protein tyrosine phosphatase non-receptor type 4
1638797_a_at	Construct	0.000778049	HIF prolyl hydroxylase	Hph	1	egl nine homolog 1 C. elegans
1624203_s_at	Construct	0.00077808	Gliotactin	Gli	1
1638556_s_at	Construct	0.000778232	Octopamine receptor in mushroom bodies	Oamb	1	adrenergic alpha-1A- receptor
1627461_at	Construct	0.000778382	bicoid stability factor	bsf	1	leucine-rich PPR-motif containing
1637008_at	Construct	0.000778382	CG14687	CG14687	1
1635224_s_at	Construct	0.000780207	Jun-related antigen	Jra	1	jun D proto-oncogene
1638041_at	Construct	0.000781794	modifier of mdg4	mod(mdg4)	1
1638824_a_at	Construct	0.000783597	no on or off transient A	nonA	1	splicing factor proline glutamine-rich polypyrimi
1638073_at	Construct	0.000785	mitochondrial ribosomal protein L38	mRpL38	1	mitochondrial ribosomal protein L38
1634606_a_at	Construct	0.000785608	CG9535	CG9535	1	UDP-N-acteylglucosamine pyrophosphorylase 1
1627795_at	Construct	0.000787465	Inwardly rectifying potassium channel	Ir	1	potassium inwardly-rectifying channel subfamily J
1623810_at	Construct	0.00079131	CG17265	CG17265	1
1628667_at	Construct	0.000792705	CG6689	CG6689	1
1638819_at	Construct	0.000793656	CG31712	CG31712	1
1623733_at	Construct	0.00079461	Nonsense-mediated mRNA 3	Nmd3	1	NMD3 homolog S. cerevisiae
1632850_at	Construct	0.00079584	CG7338	CG7338	1	TSR1 20S rRNA accumulation homolog S. cerevisia
1624702_s_at	Construct	0.000796239	dpr10	dpr10	1
1628527_at	Construct	0.000797441	---	---	1
1637632_at	Construct	0.000798023	CG12194	CG12194	1	major facilitator superfamily domain containing 1
1641202_at	Construct	0.000798023	---	---	1
1629634_at	Construct	0.000798578	CG1531	CG1531	1	zinc finger protein 650
1637736_a_at	Construct	0.000798991	UDP-N-acetyl-D-galactosamine:polypeptide N-acetylgalactosaminyltransferase 2	GalNAc-T2	1	UDP-N-acetyl-alpha-D-galactosamine:polypeptide N-a
1628646_at	Construct	0.000799491	CG18507	CG18507	1
1640064_at	Construct	0.000799921	CG32343	CG32343	1
1624345_a_at	Construct	0.000801873	Nop56	Nop56	1	nucleolar protein 5A 56kDa with KKE D repeat
1629149_at	Construct	0.000801873	Fibp	Fibp	1	fibroblast growth factor acidic intracellular bi
1634949_at	Construct	0.000801873	hemipterous	hep	1	mitogen-activated protein kinase kinase 7
1624200_at	Construct	0.000801955	CG8679	CG8679	1	ankyrin repeat domain 41
1632618_a_at	Construct	0.000802036	canoe	cno	1	myeloid lymphoid or mixed-lineage leukemia tritho
1640222_s_at	Construct	0.000802036	CG13124	CG13124	1
1636815_a_at	Construct	0.000802793	numb	numb	1	numb homolog Drosophila
1625227_at	Construct	0.000809858	CG30456	CG30456	1
1625589_at	Construct	0.000810156	CG4840	CG4840	1	golgi autoantigen golgin subfamily a 1
1631460_s_at	Construct	0.000810432	Painting of fourth	Pof	1
1632298_s_at	Construct	0.000812977	midline fasciclin	mfas	1	periostin osteoblast specific factor
1629822_a_at	Construct	0.000813464	CG15506	CG15506	1
1632889_at	Construct	0.000815737	dpr9	dpr9	1
1630319_at	Construct	0.0008163	---	---	1
1640730_at	Construct	0.000817458	pygopus	pygo	1
1638006_at	Construct	0.000818643	CG10211	CG10211	1
1640380_a_at	Construct	0.000819141	Mediator complex subunit 14	MED14	1	cofactor required for Sp1 transcriptional activati
1636654_s_at	Construct	0.00082033	CG15626	CG15626	1	etoposide induced 2.4 mRNA
1633011_at	Construct	0.000820518	cropped	crp	1
1634563_at	Construct	0.000820693	CG3764	CG3764	1
1639232_s_at	Construct	0.000822396	SP1029	SP1029	1
1630527_at	Construct	0.000822431	CG8436	CG8436	1
1636312_at	Construct	0.000822431	CG12038	CG12038	1
1639642_a_at	Construct	0.000823392	CG3239	CG3239	1
1628382_at	Construct	0.000823653	Srp54	Srp54	1	splicing factor arginine serine-rich 12
1636156_at	Construct	0.00082681	CG7372	CG7372	1	zinc finger protein 177
1632629_a_at	Construct	0.000827107	CG10804	CG10804	1	solute carrier family 6 member 18
1631195_at	Construct	0.000827616	CG30156	CG30156	1
1634447_at	Construct	0.00083042	CG31140	CG31140	1
1636681_at	Construct	0.00083054	CG14621	CG14621	1	solute carrier family 35 member E1
1637997_at	Construct	0.000831144	CG32155	CG32155	1	gamma-glutamyl hydrolase conjugase folylpolygamm
1628797_at	Construct	0.000831461	CG40260	CG40260	1
1633589_a_at	Construct	0.000834532	CG1552	CG1552	1
1633380_at	Construct	0.000835812	CG12128	CG12128	1	chromosome 9 open reading frame 114
1633468_x_at	Construct	0.000835812	CG40373	CG40373	1
1623767_at	Construct	0.000837731	CG17839	CG17839	1
1624079_a_at	Construct	0.000838623	Rab21	Rab21	1
1629973_at	Construct	0.000838907	CG6218	CG6218	1	N-acetylglucosamine kinase
1638351_s_at	Construct	0.000838955	Elongation factor 148D	Ef148D	1	eukaryotic translation elongation factor 1 alpha 1
1641452_a_at	Construct	0.000838976	LIM-kinase1	LIMK1	1	LIM domain kinase 1
1626607_at	Construct	0.000839909	CG8583	CG8583	1	SEC63-like S. cerevisiae
1626360_at	Construct	0.000841798	CG4936	CG4936	1
1637004_at	Construct	0.000841798	parcas	pcs	1	SH3-domain binding protein 5 BTK-associated
1623048_a_at	Construct	0.000842766	Ligand-gated chloride channel homolog 3	Lcch3	1	gamma-aminobutyric acid GABA A receptor beta 3
1637705_at	Construct	0.00084504	erect wing	ewg	1
1628251_at	Construct	0.000846918	CG33054	CG33054	1	chromosome 6 open reading frame 130
1627898_at	Construct	0.000847736	Sex combs extra	Sce	1	ring finger protein 2
1630362_at	Construct	0.00084793	CG18139	CG18139	1
1633833_at	Construct	0.000847945	CG18213	CG18213	1
1634562_s_at	Construct	0.000847945	CG13503	CG13503	1	WIRE protein
1630347_at	Construct	0.000848531	CG5589	CG5589	1	DEAD Asp-Glu-Ala-Asp box polypeptide 52
1629401_s_at	Construct	0.000848567	CG1814	CG1814	1	5 -nucleotidase domain containing 3
1634442_at	Construct	0.000849434	smoothened	smo	1	smoothened homolog Drosophila
1639378_at	Construct	0.0008504	CG10419	CG10419	1	survival of motor neuron protein interacting prote
1627961_a_at	Construct	0.000850762	CG18507	CG18507	1
1624054_at	Construct	0.000850963	Adenosine deaminase-related growth factor A	Adgf-A	1
1625804_s_at	Construct	0.000850963	CG17082	CG17082	1
1629104_at	Construct	0.000853395	CG2258	CG2258	1	NCK interacting protein with SH3 domain
1626129_at	Construct	0.00085378	Serotonin receptor 1B	5-HT1B	1	5-hydroxytryptamine serotonin receptor 1B
1623257_a_at	Construct	0.000853807	CG17665	CG17665	1
1630344_at	Construct	0.000854185	CG6724	CG6724	1	WD repeat domain 12
1641078_s_at	Construct	0.000856774	GalNAc-T1	GalNAc-T1	1
1630949_s_at	Construct	0.000857408	Rheb	Rheb	1	Ras homolog enriched in brain
1640020_at	Construct	0.000857507	CG10990	CG10990	1	programmed cell death 4 neoplastic transformation
1625410_at	Construct	0.000858686	CG5147	CG5147	1
1635931_at	Construct	0.000858837	CG11563	CG11563	1
1636451_a_at	Construct	0.000859041	Activating transcription factor-2	Atf-2	1
1627700_at	Construct	0.000860037	CG6420	CG6420	1
1631175_a_at	Construct	0.000861497	CG10283	CG10283	1
1623078_at	Construct	0.000862172	---	---	1
1624490_s_at	Construct	0.000862172	hunchback	hb	1	IKAROS family zinc finger 5 Pegasus
1629733_at	Construct	0.000862172	Lim kinase	Lim1	1	LIM homeobox 1
1639072_at	Construct	0.000862172	hopscotch	hop	1	Janus kinase 2 a protein tyrosine kinase
1626011_at	Construct	0.000862408	CG17834	CG17834	1
1639764_at	Construct	0.000864552	CG30020	CG30020	1
1625830_a_at	Construct	0.000865285	scruin like at the midline	slim	1	KIAA0265 protein
1639302_at	Construct	0.000867299	CG5645	CG5645	1	hypothetical protein FLJ12949
1630202_a_at	Construct	0.000868566	CG8632	CG8632	1	solute carrier family 30 zinc transporter membe
1633876_at	Construct	0.00086872	CG7110	CG7110	1
1627966_s_at	Construct	0.000869719	CG6406	CG6406	1	down-regulated by Ctnnb1 a
1626124_at	Construct	0.000870823	CG9717	CG9717	1
1636244_s_at	Construct	0.000871292	CG5191	CG5191	1
1629813_at	Construct	0.000871412	CG17691	CG17691	1
1628131_at	Construct	0.000873048	RNA polymerase III 128kD subunit	RpIII128	1	polymerase RNA III DNA directed polypeptide B
1640850_at	Construct	0.000873725	CG31012	CG31012	1
1638679_at	Construct	0.000874948	Odorant-binding protein 57d	Obp57d	1
1641346_at	Construct	0.000874989	CG12124	CG12124	1
1623549_at	Construct	0.000875011	CG1973	CG1973	1	SCY1-like 1 S. cerevisiae
1632432_at	Construct	0.000876762	CG9850	CG9850	1
1640266_a_at	Construct	0.000879001	CG7097	CG7097	1	mitogen-activated protein kinase kinase kinase kin
1640149_at	Construct	0.000880321	CG1463	CG1463	1	chromosome 1 open reading frame 181
1634784_at	Construct	0.000881235	yemanuclein	yem	1	ubinuclein 1
1624100_at	Construct	0.000882215	CG1529	CG1529	1
1627165_a_at	Construct	0.000882423	CG13645	CG13645	1	nicotinamide nucleotide adenylyltransferase 1
1627384_at	Construct	0.000882423	CG6225	CG6225	1
1637110_at	Construct	0.000882916	CG3618	CG3618	1
1623267_at	Construct	0.000883131	CG5237	CG5237	1	KIAA1409
1640524_at	Construct	0.000884331	gamma-glutamyl carboxylase	GC	1	gamma-glutamyl carboxylase
1628421_at	Construct	0.000886455	longitudinals lacking	lola	1
1634799_at	Construct	0.000888166	---	---	1
1640300_at	Construct	0.000888635	CG33144	CG33144	1	ring finger protein 144
1640088_at	Construct	0.000889075	Glutaminyl-tRNA synthetase	Aats-gln	1	glutaminyl-tRNA synthetase
1640365_s_at	Construct	0.000889075	CG14021	CG14021	1
1623664_at	Construct	0.000889085	CG10585	CG10585	1	prenyl decaprenyl diphosphate synthase subunit
1634818_s_at	Construct	0.000889878	CG2165	CG2165	1	ATPase Ca++ transporting plasma membrane 3
1641390_at	Construct	0.000890048	dpr19	dpr19	1
1627297_at	Construct	0.000893179	CG15270	CG15270	1	transmembrane protein 16H
1623218_s_at	Construct	0.000893823	Alhambra	Alh	1	myeloid lymphoid or mixed-lineage leukemia tritho
1631764_a_at	Construct	0.000893823	CG30115	CG30115	1
1633319_at	Construct	0.000893823	CG14956	CG14956	1
1631218_at	Construct	0.000894165	Dorsocross1	Doc1	1	T-box 6
1634461_at	Construct	0.000894591	DISCO Interacting Protein 2	DIP2	1	DIP2 disco-interacting protein 2 homolog C Drosop
1623631_at	Construct	0.000894842	AP-47	AP-47	1	adaptor-related protein complex 1 mu 1 subunit
1641608_at	Construct	0.000894994	CG5366	CG5366	1	cullin-associated and neddylation-dissociated 1
1636912_at	Construct	0.000897435	CG7745	CG7745	1
1623977_at	Construct	0.000900001	nervy	nvy	1	core-binding factor runt domain alpha subunit 2
1636264_at	Construct	0.000900587	VAChT	VAChT	1	solute carrier family 18 vesicular acetylcholine
1637552_s_at	Construct	0.000902163	CG32423	CG32423	1	RNA binding motif single stranded interacting pro
1624186_at	Construct	0.000902259	CG16717	CG16717	1	metallophosphoesterase domain containing 1
1627592_at	Construct	0.000902259	CG3295	CG3295	1	required for meiotic nuclear division 5 homolog A
1634172_at	Construct	0.000902259	Transcription factor IIB	TfIIB	1	general transcription factor IIB
1633170_at	Construct	0.000904623	lectin-30A	lectin-30A	1
1625745_at	Construct	0.00090597	CG31643	CG31643	1	FAST kinase domains 1
1630827_s_at	Construct	0.000906309	---	---	1
1641348_at	Construct	0.000906508	CG40214	CG40214	1
1627646_at	Construct	0.000906942	Mediator complex subunit 9	MED9	1
1635407_at	Construct	0.000907353	CG32772	CG32772	1
1641069_at	Construct	0.000907531	CG10703	CG10703	1	GRIP and coiled-coil domain containing 1
1624758_at	Construct	0.000907633	CG4318	CG4318	1
1631535_at	Construct	0.000907753	Vinculin	Vinc	1
1630884_at	Construct	0.000908981	Rad21	Rad21	1
1631104_s_at	Construct	0.000909405	Fsh-Tsh-like receptor	Fsh	1	follicle stimulating hormone receptor
1626006_at	Construct	0.000909611	Downstream of raf1 /// Dsor1 /// Dsor1	Dsor1 /// DanaDsor1 /// DpaiDsor1	1	mitogen-activated protein kinase kinase 1
1630887_a_at	Construct	0.000910135	CG14998	CG14998	1	microtubule-associated protein 7
1624365_at	Construct	0.000910351	CG10915	CG10915	1	CTTNBP2 N-terminal like
1632275_a_at	Construct	0.000910633	CG8671	CG8671	1	family with sequence similarity 102 member B
1623441_at	Construct	0.000912947	polyhomeotic proximal	ph-p	1	polyhomeotic-like 2 Drosophila
1632291_at	Construct	0.000913	Soluble NSF attachment protein	Snap	1	N-ethylmaleimide-sensitive factor attachment prote
1634246_at	Construct	0.000913	CG11319	CG11319	1	dipeptidyl-peptidase 10
1637157_at	Construct	0.000913	---	---	1
1629579_at	Construct	0.000914185	CG2478	CG2478	1	NIK and IKK{beta} binding protein
1641504_s_at	Construct	0.000915238	windpipe	wdp	1
1625446_at	Construct	0.000915664	lethal (1) G0045	l(1)G0045	1	processing of precursor 1 ribonuclease P MRP subu
1636026_at	Construct	0.00091746	Spectrin	Spec	1	spectrin beta non-erythrocytic 1
1625411_at	Construct	0.000917971	CG9227	CG9227	1	hypothetical protein MGC4093
1638445_a_at	Construct	0.000917971	Secretory Pathway Calcium atpase	SPoCk	1	ATPase Ca++ transporting type 2C member 1
1629097_at	Construct	0.000918529	knirps	kni	1
1639538_at	Construct	0.000920458	---	---	1
1629111_at	Construct	0.000921544	Mediator complex subunit 1	MED1	1	PPAR binding protein
1625705_s_at	Construct	0.000922164	Enhancer of Polycomb	E(Pc)	1
1639746_at	Construct	0.000923353	bip1	bip1	1
1631682_at	Construct	0.000926362	twist	twi	1
1624135_at	Construct	0.000927434	HBS1	HBS1	1	HBS1-like S. cerevisiae
1636712_at	Construct	0.000927434	Ribosomal protein L21	RpL21	1	similar to 60S ribosomal protein L21
1636896_a_at	Construct	0.000929756	CG12576	CG12576	1
1633840_a_at	Construct	0.000930673	CG8026	CG8026	1	solute carrier family 25 member 32
1626706_at	Construct	0.000933209	katanin 60	katanin-60	1	katanin p60 subunit A-like 1
1634156_at	Construct	0.000933402	CG5604	CG5604	1	HECT domain containing 1
1630961_at	Construct	0.000934685	CG17193	CG17193	1
1639390_at	Construct	0.000935733	CG11637	CG11637	1
1627380_at	Construct	0.000935924	Replication Protein A 70	RpA-70	1	replication protein A1 70kDa
1624193_s_at	Construct	0.000938312	CG3983	CG3983	1	guanine nucleotide binding protein-like 3 nucleol
1623899_at	Construct	0.000939063	Tachykinin-like receptor at 99D	Takr99D	1	tachykinin receptor 3
1625981_at	Construct	0.000940843	rab3-GEF /// rab3-GEF	rab3-GEF /// Dsim	1	MAP-kinase activating death domain
1625596_at	Construct	0.000943416	Oxysterol binding protein	Osbp	1	oxysterol binding protein
1637206_at	Construct	0.000944282	CG8405	CG8405	1
1626766_s_at	Construct	0.0009451	Activin Like Protein at 23B	Alp23B	1
1637749_at	Construct	0.000945741	Dopamine 2-like receptor	D2R	1	dopamine receptor D3
1638192_a_at	Construct	0.000945741	Wsck	Wsck	1
1626810_at	Construct	0.000946838	CG4400	CG4400	1	breast cancer metastasis-suppressor 1-like
1631001_s_at	Construct	0.000947697	CG6393	CG6393	1
1633329_at	Construct	0.000947697	yellow-h	yellow-h	1
1625466_at	Construct	0.000948514	CG2656	CG2656	1	ATP binding domain 1 family member C
1623353_at	Construct	0.000949839	abstrakt	abs	1	DEAD Asp-Glu-Ala-Asp box polypeptide 41
1641746_at	Construct	0.000950644	CG2555	CG2555	1
1625340_at	Construct	0.000953233	no on or off transient A	nonA	1	splicing factor proline glutamine-rich polypyrimi
1623857_at	Construct	0.000955617	Ranbp16	Ranbp16	1	exportin 7
1628426_s_at	Construct	0.000955617	CG8740	CG8740	1
1634658_a_at	Construct	0.000955885	no extended memory	nemy	1	glutaminase
1629021_at	Construct	0.000955909	CG3356	CG3356	1	ubiquitin protein ligase E3C
1637321_at	Construct	0.000956369	nicotinic Acetylcholine Receptor beta 64B	nAcR64B	1	cholinergic receptor nicotinic alpha 4
1629600_at	Construct	0.000956656	CG17660	CG17660	1	transmembrane protein 87A
1635199_at	Construct	0.000956656	CG6014	CG6014	1
1624165_a_at	Construct	0.000959281	Presenilin	Psn	1	presenilin 2 Alzheimer disease 4
1627664_a_at	Construct	0.000959684	CG11178	CG11178	1	KIAA0241
1625845_s_at	Construct	0.000961766	D1 chromosomal protein	D1	1
1633192_at	Construct	0.000962024	CG3485	CG3485	1
1630329_at	Construct	0.000962969	CG1716	CG1716	1
1632548_a_at	Construct	0.000962969	Mes2 /// Mes2	Mes2 /// DyakMes2	1
1625257_s_at	Construct	0.00096468	CG31523	CG31523	1	elongation of very long chain fatty acids FEN1 El
1632178_at	Construct	0.000966633	encore	enc	1
1634672_at	Construct	0.000966832	CG5064	CG5064	1	signal recognition particle 68kDa
1626262_s_at	Construct	0.000967171	CG3104	CG3104	1	ankyrin repeat domain 29
1630378_at	Construct	0.00096902	CG17657 /// fritz	CG17657 /// frtz	1	hypothetical protein LOC51057
1631222_at	Construct	0.000969159	CG11641	CG11641	1
1632728_at	Construct	0.000969604	Gcn2	Gcn2	1	eukaryotic translation initiation factor 2 alpha k
1636674_at	Construct	0.000969958	CG11407	CG11407	1
1631127_at	Construct	0.000970318	CG10424	CG10424	1	hypothetical protein FLJ10769
1638280_at	Construct	0.000970906	---	---	1
1624008_at	Construct	0.00097105	eIF2B-	eIF2B-	1	eukaryotic translation initiation factor 2B subun
1638048_at	Construct	0.000972511	CG31119	CG31119	1	histone deacetylase 11
1625111_at	Construct	0.000972639	CG13786	CG13786	1
1630290_at	Construct	0.000972938	CG13620	CG13620	1
1625491_at	Construct	0.000973406	brain washing	bwa	1
1626611_at	Construct	0.00097419	---	---	1
1637013_at	Construct	0.000974266	CG15453	CG15453	1
1626340_at	Construct	0.000974791	coatomer protein	Cop	1	coatomer protein complex subunit beta 1
1638618_a_at	Construct	0.000975639	CG5877	CG5877	1
1626063_at	Construct	0.00097667	---	---	1
1635495_a_at	Construct	0.000977043	Dopamine receptor 2	DopR2	1	adrenergic beta-2- receptor surface
1628038_at	Construct	0.000982596	CG13577	CG13577	1
1635840_s_at	Construct	0.000982596	male-specific lethal 2	msl-2	1
1639656_at	Construct	0.000982666	---	---	1
1638873_at	Construct	0.000982911	CG6175	CG6175	1
1624030_at	Construct	0.000984392	ribonuclease H1	rnh1	1	ribonuclease H1
1623692_s_at	Construct	0.000984584	rhomboid-4	rho-4	1	rhomboid veinlet-like 2 Drosophila
1623838_s_at	Construct	0.000986586	CG4629	CG4629	1	hypothetical protein MGC42105
1631509_a_at	Construct	0.000987578	light	lt	1
1632089_at	Construct	0.000989669	CG4045	CG4045	1	methyltransferase like 1
1640415_at	Construct	0.000989669	CG3860	CG3860	1	oxysterol binding protein-like 1A
1627677_s_at	Construct	0.000989903	CG10743	CG10743	1	PTPRF interacting protein binding protein 1 lipr
1636520_s_at	Construct	0.000990114	CG16940	CG16940	1
1629558_at	Construct	0.000990258	CG15657	CG15657	1
1637365_at	Construct	0.00099115	CG31122	CG31122	1	hypothetical protein FLJ38973
1629942_at	Construct	0.000993078	CG5292	CG5292	1	deaminase domain containing 1
1626507_at	Construct	0.000993392	CG7556	CG7556	1	DnaJ Hsp40 homolog subfamily C member 1
1639769_at	Construct	0.000993413	CG16936	CG16936	1
1629387_s_at	Construct	0.000994979	arouser	aru	1
1633674_at	Construct	0.000995382	CG31150	CG31150	1
1632753_a_at	Construct	0.000997015	CG3980	CG3980	1
1633890_at	Construct	0.000997321	CG31187	CG31187	1	diacylglycerol kinase delta 130kDa
1624953_at	Construct	1.39336e-07	Cyp12c1	Cyp12c1	2	FLJ16008 protein
1624543_s_at	Construct	2.19873e-07	---	---	2
1630258_at	Construct	2.52056e-07	Glutathione S transferase D2	GstD2	2
1629559_s_at	Construct	8.28757e-07	ABC transporter expressed in trachea	Atet	2	ATP-binding cassette sub-family G WHITE member
1635121_a_at	Construct	1.61324e-06	CG4071	CG4071	2	chromatin modifying protein 6
1636174_at	Construct	1.70294e-06	Glutathione S transferase D9	GstD9	2
1640610_at	Construct	2.28271e-06	CG6613	CG6613	2	pleckstrin homology domain containing family M w
1637821_at	Construct	2.58025e-06	CG32023	CG32023	2
1635432_at	Construct	2.72818e-06	CG14607	CG14607	2
1623679_at	Construct	3.60007e-06	CG4789	CG4789	2	RAB member of RAS oncogene family-like 3
1638858_at	Construct	5.84696e-06	CG8934	CG8934	2
1640174_at	Construct	6.22912e-06	Int6 homologue	Int6	2	eukaryotic translation initiation factor 3 subuni
1637792_at	Construct	9.74652e-06	A3-3	A3-3	2
1624580_at	Construct	1.03748e-05	CG9362	CG9362	2	glutathione transferase zeta 1 maleylacetoacetate
1627167_a_at	Construct	1.1527e-05	CG40485	CG40485	2
1625034_s_at	Construct	1.39154e-05	transforming acidic coiled-coil protein	tacc	2
1640194_a_at	Construct	1.61037e-05	Eukaryotic initiation factor 4B	eIF-4B	2
1628458_at	Construct	1.64701e-05	milton	milt	2
1629247_at	Construct	1.7201e-05	---	---	2
1624377_s_at	Construct	1.84437e-05	CG32594	CG32594	2
1625980_at	Construct	2.09918e-05	CG11835	CG11835	2
1627864_at	Construct	2.3197e-05	lethal (2) k07433	l(2)k07433	2	calmodulin regulated spectrin-associated protein 1
1625840_at	Construct	2.3371e-05	CG12001	CG12001	2
1634520_at	Construct	2.75592e-05	vein	vn	2
1627829_at	Construct	2.93698e-05	Rhodopsin 3	Rh3	2
1624611_a_at	Construct	3.06433e-05	CG2852	CG2852	2	peptidylprolyl isomerase B cyclophilin B
1638315_s_at	Construct	3.46491e-05	CG8493	CG8493	2	SUMO sentrin specific peptidase family member 8
1628160_a_at	Construct	3.63001e-05	domino	dom	2
1640774_a_at	Construct	3.74289e-05	Mob1	Mob1	2	HCCA2 protein
1625658_at	Construct	3.78659e-05	CG5181	CG5181	2	oligonucleotide oligosaccharide-binding fold conta
1631608_at	Construct	3.87812e-05	CG6954	CG6954	2	ankyrin-repeat and fibronectin type III domain con
1626133_s_at	Construct	4.34703e-05	---	---	2
1626143_a_at	Construct	4.38114e-05	CG32138	CG32138	2	formin-like 2
1630857_s_at	Construct	4.38114e-05	NTPase	NTPase	2	ectonucleoside triphosphate diphosphohydrolase 5
1624744_a_at	Construct	4.38831e-05	---	---	2
1640950_at	Construct	4.55514e-05	CG15739	CG15739	2
1623013_s_at	Construct	4.59374e-05	CG3907	CG3907	2
1629920_at	Construct	5.25645e-05	karyopherin 1	Kap-1	2	karyopherin alpha 5 importin alpha 6
1636406_at	Construct	5.56008e-05	CG10321	CG10321	2
1626079_a_at	Construct	5.57739e-05	CG2201	CG2201	2
1636137_at	Construct	5.61851e-05	defective in the avoidance of repellents	dare	2	ferredoxin reductase
1632689_at	Construct	5.6272e-05	CG1307	CG1307	2	peptidyl-tRNA hydrolase 2
1636465_at	Construct	6.55592e-05	CG9215	CG9215	2
1637560_at	Construct	6.839e-05	Eukaryotic-initiation-factor-4G	eIF-4G	2	eukaryotic translation initiation factor 4 gamma
1633632_at	Construct	6.94183e-05	CG32944	CG32944	2	serine threonine kinase 32C
1637671_a_at	Construct	6.94183e-05	CG14767	CG14767	2	lysosomal-associated protein transmembrane 4 alpha
1638447_s_at	Construct	7.04639e-05	CG11141	CG11141	2
1640375_at	Construct	7.04639e-05	bonsai	bonsai	2
1635256_s_at	Construct	7.24061e-05	CG1275	CG1275	2	cytochrome b reductase 1
1640924_a_at	Construct	7.48241e-05	CG3558	CG3558	2	chromosome 11 open reading frame 56
1633959_s_at	Construct	7.58959e-05	CG9766	CG9766	2
1632355_at	Construct	7.64095e-05	lethal with a checkpoint kinase	lack	2	SMAD specific E3 ubiquitin protein ligase 2
1625477_a_at	Construct	7.87572e-05	CG4797	CG4797	2
1629967_s_at	Construct	7.98936e-05	parkin	park	2	Parkinson disease autosomal recessive juvenile
1627888_at	Construct	8.04744e-05	CG6672	CG6672	2	solute carrier family 30 zinc transporter membe
1638682_a_at	Construct	8.20287e-05	neuralized	neur	2
1627840_a_at	Construct	8.30533e-05	zipper	zip	2	myosin heavy polypeptide 10 non-muscle
1641170_a_at	Construct	8.30641e-05	CG6946	CG6946	2	heterogeneous nuclear ribonucleoprotein F
1636741_s_at	Construct	8.39711e-05	Hsc70Cb	Hsc70Cb	2	heat shock 70kDa protein 4
1639461_a_at	Construct	8.48367e-05	Inositol 1,4,5,-tris-phosphate receptor	Itp-r83A	2	inositol 1 4 5-triphosphate receptor type 1
1637051_at	Construct	8.61257e-05	RhoGAP71E	RhoGAP71E	2
1627102_at	Construct	8.82918e-05	CG9245	CG9245	2	CDP-diacylglycerol--inositol 3-phosphatidyltransfe
1624324_a_at	Construct	8.96178e-05	mitochondrial ribosomal protein S5	mRpS5	2
1636152_a_at	Construct	9.01659e-05	CG11138	CG11138	2	chromosome 14 open reading frame 4
1625488_s_at	Construct	9.48546e-05	Rho1	Rho1	2	ras homolog gene family member A
1626492_s_at	Construct	9.54102e-05	Suppressor of profilin 2	Sop2	2	actin related protein 2 3 complex subunit 1A 41k
1625458_a_at	Construct	9.55974e-05	moleskin	msk	2	importin 7
1640051_s_at	Construct	9.56964e-05	Casein kinase II subunit	CkII	2	casein kinase 2 alpha 1 polypeptide
1636354_at	Construct	9.57599e-05	CG11107	CG11107	2	DEAH Asp-Glu-Ala-His box polypeptide 15
1636693_at	Construct	9.71479e-05	CG4330	CG4330	2
1623792_a_at	Construct	9.77403e-05	Dihydroorotate dehydrogenase	Dhod	2	dihydroorotate dehydrogenase
1629759_at	Construct	9.84841e-05	CG18815	CG18815	2	lysophospholipase I
1634217_s_at	Construct	9.91712e-05	Crk	Crk	2	v-crk sarcoma virus CT10 oncogene homolog avian -
1634521_at	Construct	9.95369e-05	COP	COP	2	coatomer protein complex subunit zeta 1
1635978_at	Construct	0.000101945	CG8229	CG8229	2
1627834_a_at	Construct	0.000104487	arrest	aret	2	CUG triplet repeat RNA binding protein 2
1641502_a_at	Construct	0.000104668	CG9391	CG9391	2	inositol myo -1 or 4 -monophosphatase 1
1635135_at	Construct	0.000105503	---	---	2
1637767_at	Construct	0.000105963	CG3305	CG3305	2	lysosomal-associated membrane protein 1
1640288_s_at	Construct	0.000105963	eukaryotic release factor 1	eRF1	2	eukaryotic translation termination factor 1
1634895_s_at	Construct	0.000106273	Rab-protein 5	Rab5	2	RAB5C member RAS oncogene family
1633731_at	Construct	0.000106558	wee	wee	2	WEE1 homolog S. pombe
1629065_s_at	Construct	0.000106595	Vacuolar H<up>+</up>-ATPase 26kD E subunit	Vha26	2	ATPase H+ transporting lysosomal 31kDa V1 subun
1629077_s_at	Construct	0.000106652	CG1021	CG1021	2	transmembrane and coiled-coil domain family 2
1630585_s_at	Construct	0.000107878	---	---	2
1633788_s_at	Construct	0.000107966	CG15186	CG15186	2
1623432_s_at	Construct	0.000108844	plexin B	plexB	2	plexin B1
1627320_at	Construct	0.000108844	Zn finger homeodomain 2	zfh2	2	zinc finger homeodomain 4
1629305_at	Construct	0.000109248	Nup214	Nup214	2	nucleoporin 214kDa
1631666_s_at	Construct	0.00011013	CG9766	CG9766	2
1633983_a_at	Construct	0.000110633	CG32046	CG32046	2
1625914_at	Construct	0.000110853	Odorant receptor 69a	Or69a	2
1635305_s_at	Construct	0.000111274	Trithorax-like	Trl	2
1641408_at	Construct	0.000111337	---	---	2
1627221_at	Construct	0.000113885	cadmus	cdm	2	importin 13
1635635_a_at	Construct	0.000113885	Msr-110	Msr-110	2
1638735_at	Construct	0.000113885	preli-like	prel	2	px19-like protein
1627142_at	Construct	0.00011401	CG2943	CG2943	2	KIAA0090
1629851_at	Construct	0.00011483	CG31998	CG31998	2
1636176_at	Construct	0.00011483	Eukaryotic initiation factor 2	eIF-2	2	eukaryotic translation initiation factor 2 subuni
1623039_at	Construct	0.000115506	CG3409	CG3409	2
1630817_s_at	Construct	0.000116032	CG17528	CG17528	2
1630603_at	Construct	0.000116436	CG31352	CG31352	2	actin binding LIM protein 1
1627239_s_at	Construct	0.000117644	CG17034	CG17034	2	ATPase aminophospholipid transporter APLT Clas
1626884_a_at	Construct	0.000117871	CG32062	CG32062	2	RNA binding motif protein 9
1635807_at	Construct	0.000118197	CG17739	CG17739	2	spondin 1 extracellular matrix protein
1631129_at	Construct	0.000118947	CG31612	CG31612	2
1632471_at	Construct	0.000118947	CG12155	CG12155	2
1628601_at	Construct	0.000119346	Kinesin-like protein at 64D	Klp64D	2	kinesin family member 3A
1632099_s_at	Construct	0.000119346	Liprin-	Liprin-	2	protein tyrosine phosphatase receptor type f pol
1628184_at	Construct	0.000122493	Tetraspanin 3A	Tsp3A	2	tetraspanin 5
1627179_s_at	Construct	0.000122658	CG32758	CG32758	2	sorting nexin family member 27
1626665_at	Construct	0.000122979	CG7408	CG7408	2
1631675_a_at	Construct	0.000123896	Peptidylglycine-hydroxylating monooxygenase	Phm	2
1639032_at	Construct	0.00012398	CG14786	CG14786	2
1623847_at	Construct	0.000124046	CG11906	CG11906	2
1635334_a_at	Construct	0.000126411	CG10732	CG10732	2
1641193_s_at	Construct	0.000127021	CG11844	CG11844	2
1630276_at	Construct	0.000127139	CG5149	CG5149	2
1623305_at	Construct	0.000128345	CG5091	CG5091	2	asparagine-linked glycosylation 6 homolog S. cere
1636844_at	Construct	0.000130171	fu2	fu2	2
1637545_at	Construct	0.000130911	CG1837	CG1837	2	thioredoxin domain containing 5
1633625_s_at	Construct	0.000132315	Pitslre	Pitslre	2
1627206_at	Construct	0.000132834	Ribosomal protein L35	RpL35	2	ribosomal protein L35
1635861_a_at	Construct	0.000132834	Tetratricopeptide repeat protein 2	Tpr2	2	DnaJ Hsp40 homolog subfamily C member 7
1639305_a_at	Construct	0.000132834	Kinesin-73	Khc-73	2	kinesin family member 13A
1627571_at	Construct	0.00013544	Cyclic-AMP response element binding protein A	CrebA	2
1628616_at	Construct	0.000135753	CG8419	CG8419	2	tripartite motif-containing 45
1641476_a_at	Construct	0.000135753	Tissue inhibitor of metalloproteases	Timp	2
1626177_s_at	Construct	0.00013608	GDI interacting protein 3	Gint3	2	UBX domain containing 1
1626615_at	Construct	0.000139686	CG31156	CG31156	2	S1 RNA binding domain 1
1639752_at	Construct	0.000140384	methuselah-like 1	mthl1	2
1628856_at	Construct	0.000140388	---	---	2
1633407_at	Construct	0.0001413	CG6959	CG6959	2
1626988_at	Construct	0.000141781	CG6805	CG6805	2
1623455_s_at	Construct	0.000142349	IGF-II mRNA-binding protein	Imp	2	insulin-like growth factor 2 mRNA binding protein
1633651_at	Construct	0.000144603	Tachykinin	Tk	2
1630658_at	Construct	0.000144627	CG32226	CG32226	2	DKFZP434B0335 protein
1631597_at	Construct	0.000145599	forkhead box, sub-group O	foxo	2	forkhead box O3A
1641400_at	Construct	0.000149051	CG9170	CG9170	2
1637033_at	Construct	0.000149261	septin interacting protein 1	sip1	2	tuftelin interacting protein 11
1640150_s_at	Construct	0.000149314	Ribosomal protein S15Aa /// Ribosomal protein S15Ab /// RpS15Aa	RpS15Aa /// RpS15Ab /// DyakRpS15Aa	2
1628041_a_at	Construct	0.00015143	Dek	Dek	2	DEK oncogene DNA binding
1629983_at	Construct	0.00015143	CG1578	CG1578	2	ATP binding domain 4
1635011_at	Construct	0.00015143	Translocase of outer membrane 20	Tom20	2	translocase of outer mitochondrial membrane 20 hom
1636643_at	Construct	0.000151704	CG6983	CG6983	2
1628580_a_at	Construct	0.000152084	Cdep	Cdep	2	FERM RhoGEF and pleckstrin domain protein 2
1640577_a_at	Construct	0.000152084	CG4966	CG4966	2
1638994_at	Construct	0.000152249	CG10627	CG10627	2	phosphoglucomutase 3
1624419_a_at	Construct	0.000152574	T-complex Chaperonin 5	Cct5	2	chaperonin containing TCP1 subunit 5 epsilon
1624798_s_at	Construct	0.000152574	G protein 49B	G49B	2	guanine nucleotide binding protein G protein q
1633887_at	Construct	0.000152574	CG13857	CG13857	2
1639424_at	Construct	0.000152574	CG6910	CG6910	2	myo-inositol oxygenase
1624555_at	Construct	0.000152592	Ets at 97D	Ets97D	2	GA binding protein transcription factor alpha sub
1633032_s_at	Construct	0.000153091	CG8177	CG8177	2	solute carrier family 4 anion exchanger member 3
1632481_at	Construct	0.000157877	CG8602	CG8602	2
1626945_at	Construct	0.00015849	Snx6	Snx6	2	sorting nexin 6
1623571_a_at	Construct	0.00015863	CG9328	CG9328	2
1629233_s_at	Construct	0.000158639	CG16708	CG16708	2	ceramide kinase
1638839_at	Construct	0.000158683	CG8092	CG8092	2
1627261_s_at	Construct	0.000158928	Calnexin 99A	Cnx99A	2	calmegin
1627212_at	Construct	0.000159303	refractory to sigma P	ref(2)P	2
1641168_s_at	Construct	0.000162136	CG1416	CG1416	2	AHA1 activator of heat shock 90kDa protein ATPase
1629263_at	Construct	0.000162526	CG13699	CG13699	2
1639758_at	Construct	0.000163679	CG13409	CG13409	2	G protein-coupled receptor 178
1626980_at	Construct	0.000164133	Pellino	Pli	2	pellino homolog 2 Drosophila
1637294_at	Construct	0.000164185	CG4641	CG4641	2
1634362_a_at	Construct	0.000165137	cabeza	caz	2	fusion involved in t 12 16 in malignant liposarc
1633498_at	Construct	0.000166747	CG7188	CG7188	2	testis enhanced gene transcript BAX inhibitor 1
1638499_s_at	Construct	0.000166747	Tfb1	Tfb1	2	general transcription factor IIH polypeptide 1 6
1632554_at	Construct	0.000167036	CG9839	CG9839	2
1637380_s_at	Construct	0.000167524	Calcium/calmodulin-dependent protein kinase I	CaMKI	2	calcium calmodulin-dependent protein kinase ID
1641461_at	Construct	0.000167524	CG2967	CG2967	2	KIAA1219
1634528_at	Construct	0.000167743	CG8412	CG8412	2	asparagine-linked glycosylation 12 homolog S. cer
1626967_at	Construct	0.000168461	Calpain-B	CalpB	2	calpain 9
1631342_at	Construct	0.000168461	Elongin B	Elongin-B	2	transcription elongation factor B SIII polypept
1633268_s_at	Construct	0.000169057	CG10806	CG10806	2	hypothetical protein BC009732
1624755_a_at	Construct	0.000169197	flap wing	flw	2	protein phosphatase 1 catalytic subunit beta iso
1630859_s_at	Construct	0.000169197	Chromator	Chro	2
1631524_a_at	Construct	0.000169197	homothorax	hth	2	Meis1 myeloid ecotropic viral integration site 1
1623234_s_at	Construct	0.000169407	Na/Ca-exchange protein	Calx	2	solute carrier family 8 sodium-calcium exchanger
1625748_s_at	Construct	0.000169984	par-6	par-6	2	par-6 partitioning defective 6 homolog gamma C. e
1627546_at	Construct	0.000170548	CTCF	CTCF	2	CCCTC-binding factor zinc finger protein
1626763_a_at	Construct	0.000170733	veli	veli	2	lin-7 homolog C C. elegans
1623408_s_at	Construct	0.000173484	CG32789 /// CG2947	CG32789 /// CG2947	2	suppression of tumorigenicity 13 colon carcinoma
1639469_a_at	Construct	0.000174031	Punch	Pu	2	GTP cyclohydrolase 1 dopa-responsive dystonia
1635442_a_at	Construct	0.000174581	Gonadotropin-releasing hormone receptor	GRHR	2
1627786_s_at	Construct	0.00017529	---	---	2
1633363_at	Construct	0.00017529	CG6428	CG6428	2	Similar to Lysophospholipase
1631099_at	Construct	0.000178135	CG17807	CG17807	2	alkB alkylation repair homolog 8 E. coli
1636513_a_at	Construct	0.00017826	kismet	kis	2	chromodomain helicase DNA binding protein 7
1641620_s_at	Construct	0.00017829	pod1	pod1	2	coronin 7
1636727_at	Construct	0.000179246	CG4768	CG4768	2	similar to CG4768-PA
1634865_at	Construct	0.000179495	---	---	2
1634402_at	Construct	0.000180612	Sarcoglycan	Scg	2
1623670_at	Construct	0.000180826	CG14562	CG14562	2
1622942_at	Construct	0.00018127	CG31959	CG31959	2
1634561_s_at	Construct	0.00018135	CG32675	CG32675	2	transmembrane protein 49
1640528_at	Construct	0.00018135	CG5053	CG5053	2
1632274_at	Construct	0.000182215	CG8134	CG8134	2	coagulation factor VIII-associated intronic trans
1624594_at	Construct	0.000182819	Sphingosine kinase 2	Sk2	2	sphingosine kinase 2
1641053_s_at	Construct	0.00018309	tolkin	tok	2	tolloid-like 1
1625962_at	Construct	0.000183923	RNA polymerase II 140kD subunit	RpII140	2	polymerase RNA II DNA directed polypeptide B
1635009_at	Construct	0.000184057	CG8500	CG8500	2	DIRAS family GTP-binding RAS-like 2
1632922_at	Construct	0.000186245	NFAT	NFAT	2
1641420_s_at	Construct	0.000186245	CG1116	CG1116	2
1625332_at	Construct	0.000187646	CG14764	CG14764	2
1630437_s_at	Construct	0.000189048	CG15118	CG15118	2	ankyrin repeat domain 13B
1629776_a_at	Construct	0.000189068	CG6643	CG6643	2	family with sequence similarity 62 C2 domain cont
1635340_at	Construct	0.000191228	tudor	tud	2
1628691_at	Construct	0.000191671	CG17514	CG17514	2
1627308_s_at	Construct	0.000191938	Ribosomal protein L15	RpL15	2
1637133_x_at	Construct	0.000191938	CG11350	CG11350	2
1635587_s_at	Construct	0.000192379	CG4050	CG4050	2	transmembrane and tetratricopeptide repeat contain
1639048_a_at	Construct	0.000192379	CG8229	CG8229	2
1638120_at	Construct	0.000192969	CG1927	CG1927	2
1628679_at	Construct	0.000194349	Snm1	Snm1	2	DNA cross-link repair 1A PSO2 homolog S. cerevis
1632103_at	Construct	0.000194349	CG9769	CG9769	2
1624564_s_at	Construct	0.000194371	Ribosomal protein S14a	RpS14a	2	similar to ribosomal protein S14
1627933_a_at	Construct	0.000195548	mXr	mXr	2	glutamate receptor metabotropic 4
1623889_at	Construct	0.000199115	CG1317	CG1317	2	membrane-associated ring finger C3HC4 6
1636344_at	Construct	0.000199336	chaoptic	chp	2
1635422_s_at	Construct	0.000199548	CG9147	CG9147	2
1634507_s_at	Construct	0.000200235	CG17549	CG17549	2
1631114_a_at	Construct	0.000200613	CG11489	CG11489	2	SFRS protein kinase 1
1627566_a_at	Construct	0.000200933	CG12163 /// CG33293	CG12163 /// CG33293	2	cathepsin F
1640260_at	Construct	0.000201135	Abnormal X segregation	Axs	2	transmembrane protein 16K
1632796_s_at	Construct	0.000201329	Ecdysone receptor	EcR	2	nuclear receptor subfamily 1 group H member 3
1631327_at	Construct	0.000201563	M-spondin	mspo	2
1641031_s_at	Construct	0.0002024	CG17383	CG17383	2
1629290_at	Construct	0.000202709	Smad on X	Smox	2	SMAD mothers against DPP homolog 2 Drosophila
1624150_at	Construct	0.000203165	FK506-binding protein FKBP59	FKBP59	2	FK506 binding protein 4 59kDa
1635370_at	Construct	0.000203165	Tetraspanin 42El	Tsp42El	2
1624407_s_at	Construct	0.000204768	lin-19-like	lin19	2	cullin 1
1624604_a_at	Construct	0.000204768	CG5629	CG5629	2	phosphopantothenoylcysteine synthetase
1635517_at	Construct	0.000204979	CG1667	CG1667	2
1641410_at	Construct	0.000205141	---	---	2
1625475_s_at	Construct	0.000205235	downstream of receptor kinase	drk	2	growth factor receptor-bound protein 2
1628782_at	Construct	0.000205235	CG4341	CG4341	2	transmembrane and tetratricopeptide repeat contain
1623901_s_at	Construct	0.000207074	sar1	sar1	2	SAR1 gene homolog B S. cerevisiae
1641708_at	Construct	0.000207074	CG7814	CG7814	2	WD repeat domain 44
1633727_s_at	Construct	0.000209308	CG8789	CG8789	2	mitogen-activated protein kinase kinase kinase 13
1636867_s_at	Construct	0.000209308	CG7987	CG7987	2
1633760_at	Construct	0.000211719	CG10399	CG10399	2	3-hydroxymethyl-3-methylglutaryl-Coenzyme A lyase
1640130_at	Construct	0.000211719	CG31678	CG31678	2
1637946_at	Construct	0.000212134	CG5068	CG5068	2	protein phosphatase methylesterase 1
1631237_s_at	Construct	0.000213077	CG13384	CG13384	2	solute carrier family 36 proton amino acid sympor
1629859_s_at	Construct	0.00021413	vacuolar peduncle	vap	2	RAS p21 protein activator GTPase activating prote
1628486_a_at	Construct	0.000215197	d4	d4	2	D4 zinc and double PHD fingers family 2
1635378_at	Construct	0.000215865	CG7177	CG7177	2
1635954_at	Construct	0.000215865	lava lamp	lva	2	golgi autoantigen golgin subfamily b macrogolgin
1629786_a_at	Construct	0.000215915	CG31116	CG31116	2	chloride channel 2
1640324_at	Construct	0.000215967	Annexin IX	AnnIX	2	annexin A11
1624899_at	Construct	0.000217197	Ras oncogene at 85D	Ras85D	2	v-Ki-ras2 Kirsten rat sarcoma viral oncogene homol
1628942_at	Construct	0.000217416	CG15385	CG15385	2	acid phosphatase-like 2
1640767_s_at	Construct	0.000217416	CG14591	CG14591	2	transmembrane protein 164
1638086_at	Construct	0.000217748	CG3746	CG3746	2
1627321_x_at	Construct	0.000218306	Glutathione Synthetase	GS	2	glutathione synthetase
1636141_s_at	Construct	0.000218306	groucho	gro	2	transducin-like enhancer of split 3 E sp1 homolo
1638130_at	Construct	0.000218891	CG7379	CG7379	2	inhibitor of growth family member 1
1632931_at	Construct	0.000219194	concertina	cta	2
1632577_a_at	Construct	0.000219589	Suppressor of variegation 3-9	Su(var)3-9	2	eukaryotic translation initiation factor 2 subuni
1636708_at	Construct	0.000219659	CG3061	CG3061	2	DnaJ Hsp40 homolog subfamily B member 12
1627736_at	Construct	0.00022031	activin-	activin-	2
1628558_at	Construct	0.00022031	CG30022	CG30022	2	ethylmalonic encephalopathy 1
1628572_s_at	Construct	0.00022031	CG31006	CG31006	2
1634527_s_at	Construct	0.000221411	concertina /// CG40005	cta /// CG40005	2
1635040_a_at	Construct	0.000223265	dilute class unconventional myosin	didum	2	myosin VA heavy polypeptide 12 myoxin
1633528_s_at	Construct	0.000223577	extradenticle	exd	2	pre-B-cell leukemia transcription factor 1
1634836_a_at	Construct	0.000223577	CG9317	CG9317	2
1624732_at	Construct	0.000224666	Glutathione S transferase E5	GstE5	2
1624006_at	Construct	0.000225209	Mediator complex subunit 25	MED25	2	mediator of RNA polymerase II transcription subun
1630086_at	Construct	0.000225686	CG15897	CG15897	2	WD repeat domain 4
1624496_at	Construct	0.000227053	xl6	xl6	2	splicing factor arginine serine-rich 7 35kDa
1623138_at	Construct	0.000227107	CG17509	CG17509	2	androgen-induced proliferation inhibitor
1638321_s_at	Construct	0.000227107	CG4847	CG4847	2
1636788_a_at	Construct	0.000227317	loquacious	loqs	2	Tar HIV-1 RNA binding protein 2
1631118_s_at	Construct	0.000228554	MAP kinase activated protein-kinase-2	MAPk-Ak2	2	mitogen-activated protein kinase-activated protein
1633901_at	Construct	0.000228554	---	---	2
1632222_a_at	Construct	0.000228757	CG9238	CG9238	2
1641318_at	Construct	0.00022933	CG8132	CG8132	2	nitrilase family member 2
1635398_at	Construct	0.000230066	Sarcoplasmic calcium-binding protein 2	Scp2	2
1640470_s_at	Construct	0.000231726	Furin 2	Fur2	2	proprotein convertase subtilisin kexin type 5
1638505_at	Construct	0.000232553	CG12120	CG12120	2
1628920_at	Construct	0.000232741	CG12237	CG12237	2	phosphatase orphan 2
1624504_s_at	Construct	0.000233299	Mitochondrial carrier homolog 1	Mtch	2	mitochondrial carrier homolog 2 C. elegans
1624826_at	Construct	0.000233439	CG8552	CG8552	2	SEC23 interacting protein
1625683_at	Construct	0.000234572	CG5112	CG5112	2
1626405_at	Construct	0.000235048	Rep1	Rep1	2
1623422_a_at	Construct	0.000236117	CG31908	CG31908	2
1624392_s_at	Construct	0.000236969	Malvolio	Mvl	2	solute carrier family 11 proton-coupled divalent
1632973_at	Construct	0.000236973	modifier of mdg4	mod(mdg4)	2
1626888_at	Construct	0.000237847	CG9426	CG9426	2	intracisternal A particle-promoted polypeptide
1638526_a_at	Construct	0.000238361	CG3744	CG3744	2	dipeptidyl-peptidase 9
1626375_a_at	Construct	0.000239376	Usf	Usf	2
1625178_at	Construct	0.000239801	CG31038	CG31038	2
1625931_at	Construct	0.000239901	diablo	dbo	2	kelch-like 20 Drosophila
1637870_a_at	Construct	0.000240695	dpr5	dpr5	2
1638664_s_at	Construct	0.000241271	Eukaryotic initiation factor 4a	eIF-4a	2	eukaryotic translation initiation factor 4A isofo
1634709_at	Construct	0.000242132	CG12402	CG12402	2
1637992_at	Construct	0.000242473	CG6607	CG6607	2	coiled-coil domain containing 128
1625281_at	Construct	0.000242481	CG6191	CG6191	2	Cdk5 and Abl enzyme substrate 2
1640142_at	Construct	0.000243104	mitochondrial ribosomal protein S9	mRpS9	2	mitochondrial ribosomal protein S9
1632322_at	Construct	0.000244497	CG16953	CG16953	2
1635826_s_at	Construct	0.000244497	CG9940	CG9940	2	NAD synthetase 1
1629844_s_at	Construct	0.000244913	retina aberrant in pattern	rap	2	fizzy cell division cycle 20 related 1 Drosophila
1630342_s_at	Construct	0.000244913	CG3631	CG3631	2	family with sequence similarity 20 member B
1637598_at	Construct	0.000244941	CG15715	CG15715	2	zinc finger protein 706
1639148_at	Construct	0.000244961	CG5325	CG5325	2	peroxisomal biogenesis factor 19
1631884_at	Construct	0.00024545	---	---	2
1633284_at	Construct	0.000247071	eIF6	eIF6	2	integrin beta 4 binding protein
1631690_a_at	Construct	0.000247639	CG9945	CG9945	2	WD repeat domain 23
1634782_s_at	Construct	0.000249237	Cct	Cct	2	chaperonin containing TCP1 subunit 3 gamma
1639335_at	Construct	0.000249337	---	---	2
1629510_at	Construct	0.000249635	CG4294	CG4294	2
1635633_s_at	Construct	0.000249945	bicoid-interacting protein 3	bin3	2	bin3 bicoid-interacting 3 homolog Drosophila
1640031_at	Construct	0.000250538	Angiotensin-converting enzyme-related	Acer	2
1629321_at	Construct	0.000251226	absent, small, or homeotic discs 1	ash1	2
1632318_at	Construct	0.000253597	CG12773	CG12773	2	solute carrier family 12 potassium chloride trans
1640293_s_at	Construct	0.000256906	CG6838	CG6838	2	zinc finger protein 289 ID1 regulated
1633805_a_at	Construct	0.000257288	saxophone	sax	2	activin A receptor type I
1626585_s_at	Construct	0.000257737	CG4589	CG4589	2	leucine zipper-EF-hand containing transmembrane pr
1638738_s_at	Construct	0.000257752	ced-6	ced-6	2	GULP engulfment adaptor PTB domain containing 1
1626883_at	Construct	0.000258095	CG1620	CG1620	2	mesoderm induction early response 1 homolog Xenop
1628853_at	Construct	0.000258165	CG8915	CG8915	2	YTH domain containing 2
1634295_at	Construct	0.000259164	hoepel2	hoe2	2
1638486_at	Construct	0.000259164	RNA-binding protein 1	Rbp1	2	splicing factor arginine serine-rich 3
1632574_at	Construct	0.000259526	CG6574	CG6574	2	solute carrier family 19 member 3
1639318_at	Construct	0.000260073	Su(Tpl)	Su(Tpl)	2	elongation factor RNA polymerase II 2
1633448_at	Construct	0.000261342	CG11926	CG11926	2	MON1 homolog A yeast
1631313_at	Construct	0.000262314	CG2846	CG2846	2	riboflavin kinase
1625702_s_at	Construct	0.000262386	TBP-associated factor 12	Taf12	2	TAF12 RNA polymerase II TATA box binding protein
1637830_s_at	Construct	0.000263943	CG31145	CG31145	2	family with sequence similarity 20 member C
1628390_at	Construct	0.000263962	CG6151	CG6151	2
1622982_at	Construct	0.000264754	p38b	p38b	2	mitogen-activated protein kinase 11
1623490_at	Construct	0.000264754	Tenascin major	Ten-m	2	odz odd Oz ten-m homolog 2 Drosophila
1627816_a_at	Construct	0.000264754	CG32264	CG32264	2
1641359_at	Construct	0.000264754	Ser7	Ser7	2
1629815_at	Construct	0.000266207	CG33679	CG33679	2
1635507_at	Construct	0.000266738	CG4269	CG4269	2
1625017_at	Construct	0.000268309	CG3732	CG3732	2	zinc finger RAN-binding domain containing 2
1634993_at	Construct	0.000268366	CG40498	CG40498	2
1625762_s_at	Construct	0.000269269	CG32189 /// CG32188	CG32189 /// CG32188	2
1640233_at	Construct	0.000270285	CG5174	CG5174	2
1634157_at	Construct	0.00027074	Brahma associated protein 60kD	Bap60	2	SWI SNF related matrix associated actin dependen
1631729_at	Construct	0.000271927	CG13671	CG13671	2
1632057_at	Construct	0.000271927	blue cheese	bchs	2	WD repeat and FYVE domain containing 3
1622923_at	Construct	0.000272969	wrapper	wrapper	2
1627434_at	Construct	0.000272969	CG5741	CG5741	2
1641556_a_at	Construct	0.000272969	lethal (2) k05819	l(2)k05819	2
1641653_at	Construct	0.000272969	WASp	WASp	2	Wiskott-Aldrich syndrome-like
1628861_at	Construct	0.0002731	CG7120	CG7120	2
1634213_at	Construct	0.0002731	CG13139	CG13139	2	Lix1 homolog mouse like
1639940_at	Construct	0.000273367	disconnected	disco	2
1634922_s_at	Construct	0.000273403	CG32795	CG32795	2	transmembrane protein induced by tumor necrosis fa
1628141_at	Construct	0.000274262	rhea	rhea	2	talin 2
1624864_s_at	Construct	0.000274464	dreadlocks	dock	2	NCK adaptor protein 1
1630005_at	Construct	0.000276237	CG32744	CG32744	2
1631372_a_at	Construct	0.000276313	AP-2	AP-2	2	transcription factor AP-2 alpha activating enhanc
1634587_s_at	Construct	0.000276985	Mnf	Mnf	2
1639109_a_at	Construct	0.000277224	Collapsin Response Mediator Protein	CRMP	2	dihydropyrimidinase
1629843_s_at	Construct	0.000278336	Ubc-E2H	Ubc-E2H	2	ubiquitin-conjugating enzyme E2H UBC8 homolog ye
1632809_at	Construct	0.000278336	CG14762	CG14762	2	SLIT and NTRK-like family member 3
1629411_at	Construct	0.000280011	CG8444	CG8444	2	ATPase H+ transporting lysosomal accessory prote
1631877_a_at	Construct	0.000280165	Histidyl-tRNA synthetase	Aats-his	2	histidyl-tRNA synthetase
1640533_at	Construct	0.000281373	CG32406	CG32406	2
1629744_a_at	Construct	0.000281847	Mannosidase I	Man-I	2	mannosidase alpha class 1A member 2
1632818_at	Construct	0.000282387	CG32281	CG32281	2	TRM5 tRNA methyltransferase 5 homolog S. cerevisi
1640871_at	Construct	0.000282387	Cortactin	Cortactin	2	hematopoietic cell-specific Lyn substrate 1
1629756_at	Construct	0.000282822	CG11092	CG11092	2
1632724_at	Construct	0.000282822	Catenin	Cat	2	catenin cadherin-associated protein alpha 2
1635382_at	Construct	0.000282822	discs large 1	dlg1	2	discs large homolog 1 Drosophila
1632573_at	Construct	0.000283336	Mitf	Mitf	2	microphthalmia-associated transcription factor
1640582_at	Construct	0.000283336	CG3529	CG3529	2	target of myb1-like 2 chicken
1627768_at	Construct	0.00028429	CG12384	CG12384	2
1633611_s_at	Construct	0.00028443	CG32043	CG32043	2
1634069_at	Construct	0.000284526	CG40109	CG40109	2
1636508_at	Construct	0.000284526	Neurocalcin	Nca	2
1637887_at	Construct	0.000284526	CG1703	CG1703	2	ATP-binding cassette sub-family F GCN20 member
1639015_s_at	Construct	0.000284526	G protein s 60A	G-s60A	2	GNAS complex locus
1639663_at	Construct	0.000284894	CG6276	CG6276	2
1634269_at	Construct	0.000285187	CG13784	CG13784	2
1627676_at	Construct	0.000285653	CG1074	CG1074	2	chromosome 6 open reading frame 75
1624353_at	Construct	0.000286247	CG32654	CG32654	2
1639966_a_at	Construct	0.000286565	CG3262	CG3262	2	nucleotide binding protein-like
1627257_at	Construct	0.000286708	CG4433	CG4433	2	phosphatidylinositol glycan anchor biosynthesis c
1636831_s_at	Construct	0.000286753	brahma	brm	2	SWI SNF related matrix associated actin dependen
1633287_at	Construct	0.000286833	Adam	Adam	2	eukaryotic translation initiation factor 3 subuni
1641518_a_at	Construct	0.000286833	split ends	spen	2
1628190_at	Construct	0.000286913	---	---	2
1639013_at	Construct	0.000288042	CG5027	CG5027	2	thioredoxin domain containing 10
1631721_at	Construct	0.000288871	CKII- subunit interactor-1	CkIIi1	2
1633804_at	Construct	0.000288871	RhoGDI	RhoGDI	2	Rho GDP dissociation inhibitor GDI alpha
1638871_at	Construct	0.000289124	SCAR	SCAR	2	WAS protein family member 3
1625243_a_at	Construct	0.000289741	Enhancer of bithorax	E(bx)	2
1632771_at	Construct	0.000290073	mitochondrial ribosomal protein S29	mRpS29	2	death associated protein 3
1641333_s_at	Construct	0.000290073	prominin-like	prominin-like	2	prominin 1
1626940_at	Construct	0.000290266	spenito	nito	2	RNA binding motif protein 15
1631083_at	Construct	0.000290266	lethal (1) G0144	l(1)G0144	2	protein prenyltransferase alpha subunit repeat con
1635427_a_at	Construct	0.000290459	GUK-holder	gukh	2
1630002_s_at	Construct	0.00029073	Hormone receptor-like in 39	Hr39	2
1625047_at	Construct	0.000292063	quaking related 58E-2	qkr58E-2	2
1625284_at	Construct	0.00029297	CG13605	CG13605	2
1626780_s_at	Construct	0.000292999	CG4678	CG4678	2	carboxypeptidase M
1632134_s_at	Construct	0.000293043	Axin	Axn	2	axin 1
1641523_at	Construct	0.000293438	CG40380	CG40380	2
1630196_at	Construct	0.000293755	Bem46	Bem46	2	abhydrolase domain containing 13
1625146_a_at	Construct	0.000293895	tre oncogene-related protein	RN-tre	2	USP6 N-terminal like
1641072_at	Construct	0.000293895	PEK	PEK	2	eukaryotic translation initiation factor 2-alpha k
1636928_s_at	Construct	0.000295286	CG1486	CG1486	2	KIAA0251 protein
1640841_at	Construct	0.000296937	microtubule star	mts	2	protein phosphatase 2 formerly 2A catalytic sub
1628243_at	Construct	0.000297139	debra	dbr	2
1641448_a_at	Construct	0.000297571	Dystroglycan	Dg	2
1626673_s_at	Construct	0.000297962	CG31716	CG31716	2
1631578_s_at	Construct	0.000297962	CG14213	CG14213	2	RCD1 required for cell differentiation1 homolog S
1633927_a_at	Construct	0.000298475	beat-IIIc	beat-IIIc	2
1624302_at	Construct	0.000298954	CG7903	CG7903	2
1638414_a_at	Construct	0.000299015	Bmcp	Bmcp	2	solute carrier family 25 member 30
1631092_at	Construct	0.000299639	CG8032	CG8032	2	spermine oxidase
1630683_at	Construct	0.000299641	CG5208	CG5208	2	FLJ36874 protein
1636883_s_at	Construct	0.000301142	High mobility group protein D	HmgD	2
1635300_at	Construct	0.000301354	CG1268	CG1268	2
1637255_a_at	Construct	0.000301444	Esterase-7	Est7	2
1640082_at	Construct	0.000301606	MYPT-75D	MYPT-75D	2	protein phosphatase 1 regulatory inhibitor subu
1628496_at	Construct	0.000305504	dpr16	dpr16	2
1629663_at	Construct	0.000305742	CG1832	CG1832	2
1638290_at	Construct	0.000305742	CG32528	CG32528	2	parvin beta
1636040_at	Construct	0.000305819	CG10527	CG10527	2
1633019_a_at	Construct	0.000305964	CG17540	CG17540	2
1623037_a_at	Construct	0.000306145	CG5594	CG5594	2	solute carrier family 12 potassium chloride trans
1625771_at	Construct	0.000307165	Distal-less	Dll	2	distal-less homeobox 1
1636331_at	Construct	0.000307404	Sox102F /// Sox102F	Sox102F /// DsimSox102F	2	SRY sex determining region Y -box 6
1631430_at	Construct	0.0003077	Cdc27	Cdc27	2	cell division cycle 27
1624168_at	Construct	0.000307885	CG14411	CG14411	2	myotubularin related protein 10
1625338_at	Construct	0.000307885	Cyp4d20	Cyp4d20	2
1641498_at	Construct	0.000307896	eIF4AIII	eIF4AIII	2	DEAD Asp-Glu-Ala-Asp box polypeptide 48
1628673_at	Construct	0.000308174	hook	hk	2	hook homolog 3 Drosophila
1639984_at	Construct	0.000309064	rapsynoid	raps	2	G-protein signalling modulator 2 AGS3-like C. el
1625978_at	Construct	0.000309081	CG15141	CG15141	2	chromosome 14 open reading frame 130
1633693_at	Construct	0.000309148	CG13814	CG13814	2
1623376_s_at	Construct	0.000309243	N-methyl-D-aspartate receptor-associated protein	Nmda1	2	glutamate receptor ionotropic N-methyl D-asparat
1638820_at	Construct	0.000311294	CG12870	CG12870	2
1639274_at	Construct	0.00031134	CG15859	CG15859	2
1626794_at	Construct	0.000311537	CG40486	CG40486	2
1627665_at	Construct	0.000311537	CG17486	CG17486	2
1632374_at	Construct	0.000311537	CG6769	CG6769	2	zinc finger protein 622
1635802_s_at	Construct	0.000311537	CG9279	CG9279	2
1636488_at	Construct	0.000311537	CG4468	CG4468	2
1634859_at	Construct	0.000313236	r2d2	r2d2	2
1640377_s_at	Construct	0.000313966	Ras-related protein	Rala	2	v-ral simian leukemia viral oncogene homolog A ra
1635018_at	Construct	0.000315609	CG10105	CG10105	2	mitogen-activated protein kinase associated protei
1629748_s_at	Construct	0.000318308	CG2747	CG2747	2	KIAA1414 protein
1635961_at	Construct	0.000318308	CG33472	CG33472	2
1626368_at	Construct	0.00031924	lace	lace	2	serine palmitoyltransferase long chain base subun
1631499_a_at	Construct	0.000320181	swiss cheese	sws	2	patatin-like phospholipase domain containing 7
1631591_at	Construct	0.000321027	CG31935	CG31935	2	RAB3 GTPase activating protein subunit 1 catalyti
1634913_s_at	Construct	0.000323039	CG7228	CG7228	2
1626411_at	Construct	0.000323119	lethal (1) G0193	l(1)G0193	2
1632135_a_at	Construct	0.000325692	female lethal d	fl(2)d	2
1625145_a_at	Construct	0.00032952	Annexin B11	Anxb11	2	annexin A7
1624265_at	Construct	0.000329756	lethal (1) G0196	l(1)G0196	2	Histidine acid phosphatase domain containing 1
1641312_at	Construct	0.000331459	Kinesin heavy chain	Khc	2	kinesin family member 5B
1633607_at	Construct	0.000331672	CG2444	CG2444	2
1638758_at	Construct	0.000331906	CG3016	CG3016	2	ubiquitin specific peptidase 30
1634838_at	Construct	0.000332532	CG10638	CG10638	2
1631161_at	Construct	0.000332756	pelota	pelo	2	pelota homolog Drosophila
1638173_s_at	Construct	0.000332756	CG2950	CG2950	2
1636106_s_at	Construct	0.000333812	CG18212	CG18212	2	ribosome binding protein 1 homolog 180kDa dog
1624296_at	Construct	0.000333839	CG14508	CG14508	2
1627515_at	Construct	0.000333883	CG10641	CG10641	2	EF-hand domain family member D1
1630918_at	Construct	0.000334234	a6	a6	2
1637648_at	Construct	0.000335841	CG11191	CG11191	2
1627136_at	Construct	0.000336827	Kinesin-73	Khc-73	2	kinesin family member 13A
1627668_s_at	Construct	0.000336827	bobby sox	bbx	2	GUF1 GTPase homolog S. cerevisiae
1631181_a_at	Construct	0.000337482	CG3294	CG3294	2	U2 small nuclear RNA auxiliary factor 1-like 2
1626219_s_at	Construct	0.000339922	O-glycosyltransferase	Ogt	2	O-linked N-acetylglucosamine GlcNAc transferase
1629930_s_at	Construct	0.000340479	CTP:phosphocholine cytidylyltransferase 1	Cct1	2	phosphate cytidylyltransferase 1 choline alpha
1635307_at	Construct	0.000340479	CG4662	CG4662	2	EF-hand domain family member A2
1641564_a_at	Construct	0.000340843	Ribonuclear protein at 97D	Rb97D	2
1628436_at	Construct	0.000340952	CG13203	CG13203	2
1624787_s_at	Construct	0.000341277	CG16959	CG16959	2
1635631_a_at	Construct	0.000341277	rab3-GAP	rab3-GAP	2	RAB3 GTPase activating protein subunit 2 non-cata
1623264_at	Construct	0.000342243	CG3493	CG3493	2	golgi autoantigen golgin subfamily a 4
1629752_at	Construct	0.000342654	CG5525	CG5525	2	chaperonin containing TCP1 subunit 4 delta
1630703_at	Construct	0.000344567	CG8963	CG8963	2	poly A binding protein interacting protein 1
1624037_s_at	Construct	0.000344681	TBP-associated factor 4	Taf4	2	TAF4b RNA polymerase II TATA box binding protein
1625343_at	Construct	0.000344681	CG5931	CG5931	2	activating signal cointegrator 1 complex subunit 3
1626947_s_at	Construct	0.000344681	pleiohomeotic	pho	2
1632756_at	Construct	0.000344681	CG33249	CG33249	2	inositol polyphosphate-4-phosphatase type I 107k
1639588_at	Construct	0.000344681	CG5073	CG5073	2	programmed cell death 10
1640303_a_at	Construct	0.000344787	pastrel /// pst	pst /// Dyakpst	2
1623698_s_at	Construct	0.000345019	Inhibitor of apoptosis 2	Iap2	2	baculoviral IAP repeat-containing 3
1630729_at	Construct	0.000345583	telomere fusion	tefu	2	ataxia telangiectasia mutated includes complement
1628481_at	Construct	0.000345807	mitochondrial ribosomal protein L1	mRpL1	2	mitochondrial ribosomal protein L1
1625891_at	Construct	0.000346992	CG17111	CG17111	2
1626479_at	Construct	0.000347749	CG13790	CG13790	2
1634168_s_at	Construct	0.000347749	CG5515	CG5515	2	RWD domain containing 1
1628842_s_at	Construct	0.000348171	calsyntenin-1	cals	2	calsyntenin 1
1636673_s_at	Construct	0.000348171	tramtrack	ttk	2
1633517_at	Construct	0.000352157	CG5726	CG5726	2
1637442_at	Construct	0.000352157	tout-velu	ttv	2	exostoses multiple 1
1630026_s_at	Construct	0.000352594	decapentaplegic	dpp	2	bone morphogenetic protein 2
1634061_a_at	Construct	0.000352768	retinal degeneration C	rdgC	2	protein phosphatase EF-hand calcium binding domai
1629487_at	Construct	0.000353628	Cyclin-dependent kinase 9	Cdk9	2	cyclin-dependent kinase 9 CDC2-related kinase
1626676_at	Construct	0.000354728	plexin B	plexB	2	plexin B1
1629165_at	Construct	0.000354728	CG4203	CG4203	2	KIAA0892
1637662_at	Construct	0.000354944	msta	msta	2
1625175_s_at	Construct	0.000358166	CG7082	CG7082	2	tudor and KH domain containing
1624502_a_at	Construct	0.000358302	CG1104	CG1104	2	KIAA0776
1637369_at	Construct	0.000359613	Hdac3	Hdac3	2	histone deacetylase 3
1634919_at	Construct	0.000359996	CG11123	CG11123	2	chromosome 14 open reading frame 21
1626574_at	Construct	0.000360645	CG9935	CG9935	2
1638417_at	Construct	0.000361252	CG31373	CG31373	2
1638141_x_at	Construct	0.000361861	---	---	2
1627749_at	Construct	0.000362728	CG6412	CG6412	2	Ts translation elongation factor mitochondrial
1623936_at	Construct	0.000363572	clot /// cl	cl /// Dyakcl	2	thioredoxin-like 5
1636943_s_at	Construct	0.000363588	Serine protease inhibitor 5	Spn5	2
1631130_at	Construct	0.000363657	CG5745	CG5745	2	TBC1 domain family member 22B
1633839_at	Construct	0.000363876	CG14830	CG14830	2
1640202_at	Construct	0.000366142	Imaginal disc growth factor 2	Idgf2	2
1629087_s_at	Construct	0.000367432	---	---	2
1637024_at	Construct	0.000367773	VhaPPA1-1	VhaPPA1-1	2	ATPase H+ transporting lysosomal 21kDa V0 subun
1630269_s_at	Construct	0.000370014	skuld	skd	2	thyroid hormone receptor associated protein 2
1639052_a_at	Construct	0.000370014	CG12024	CG12024	2	CUE domain containing 1
1640295_a_at	Construct	0.000370594	RhoGAP71E	RhoGAP71E	2
1639023_at	Construct	0.00037082	NEM-sensitive fusion protein 2	Nsf2	2
1637558_at	Construct	0.000372628	CG8594	CG8594	2	chloride channel 7
1627398_a_at	Construct	0.000372852	G protein subunit 13F	G13F	2	guanine nucleotide binding protein G protein be
1637851_at	Construct	0.000372909	CG7422	CG7422	2
1624288_at	Construct	0.000373549	CG10654	CG10654	2
1634779_at	Construct	0.000373549	Haspin	Haspin	2
1627719_at	Construct	0.000373557	goliath	gol	2	ring finger protein 150
1637541_at	Construct	0.000373611	Fs	Fs	2	follistatin
1629767_s_at	Construct	0.000374117	Src oncogene at 42A	Src42A	2	fyn-related kinase
1624301_at	Construct	0.000374304	CG10542	CG10542	2	ring finger protein 40
1632894_at	Construct	0.000375142	CG12121	CG12121	2	G protein-coupled receptor 107
1626844_at	Construct	0.000375288	Heat shock factor	Hsf	2
1631013_at	Construct	0.000375288	myoblast city	mbc	2	dedicator of cytokinesis 1
1639576_at	Construct	0.000376249	Kinesin-like protein at 68D	Klp68D	2	kinesin family member 3B
1633568_s_at	Construct	0.000376739	CG17683	CG17683	2
1630882_s_at	Construct	0.000378099	XNP	XNP	2	alpha thalassemia mental retardation syndrome X-li
1633527_a_at	Construct	0.000378099	Chromosome-associated protein	Cap	2	structural maintenance of chromosomes 3
1634656_s_at	Construct	0.000378099	---	---	2
1637940_s_at	Construct	0.000378099	CG4452	CG4452	2	family with sequence similarity 76 member A
1637787_a_at	Construct	0.000378202	CG8233	CG8233	2	hypothetical protein FLJ10081
1639947_s_at	Construct	0.000378245	CG11166	CG11166	2	ELL associated factor 2
1635684_a_at	Construct	0.00037865	unc-13	unc-13	2
1624297_at	Construct	0.000380524	derailed	drl	2
1640968_a_at	Construct	0.000380783	Ataxin-2	Atx2	2	ataxin 2
1629251_at	Construct	0.000381268	Rpb7	Rpb7	2	polymerase RNA II DNA directed polypeptide G
1631348_at	Construct	0.000382607	---	---	2
[truncated: 6,064 more rows]

## Sheet: BY_Construct
GENE	D380N	K423E	Q368X	R342K	wtMYOC	Cons_FDR	Cons_Bonferoni	Cons_p_value	q-value
1624953_at	8.63433	8.6021	9.11253	8.68391	9.06151	1.39336e-07	2.06667e-05	6.3688e-10	6.69144e-07
1624543_s_at	10.4225	10.4401	11.4871	10.2701	11.7663	2.19873e-07	3.58788e-05	1.10618e-09	6.69144e-07
1630258_at	9.08153	8.98732	8.9492	9.01027	8.71509	2.52056e-07	4.21285e-05	1.29902e-09	6.69144e-07
1630093_at	13.6855	13.7349	13.8259	13.8389	13.6653	5.33181e-07	0.000108618	3.35303e-09	1.29539e-06
1629559_s_at	9.25327	9.15857	9.11361	9.07536	9.68874	8.28757e-07	0.00019581	6.0508e-09	1.87011e-06
1635121_a_at	9.77443	9.86215	10.1443	10.1378	9.85777	1.61324e-06	0.000472971	1.46412e-08	3.47137e-06
1636174_at	9.93885	10.0182	10.0904	10.1333	10.35	1.70294e-06	0.000507866	1.57244e-08	3.47137e-06
1640610_at	8.84635	8.89862	8.80265	8.80194	9.20815	2.28271e-06	0.000752688	2.33276e-08	4.50614e-06
1637821_at	8.83234	8.82656	8.57292	8.52529	8.53942	2.58025e-06	0.000883317	2.73871e-08	4.53957e-06
1635432_at	8.60704	8.57719	8.47771	8.34902	8.31676	2.72818e-06	0.000947311	2.93758e-08	4.53957e-06
1623679_at	9.11504	8.92925	8.52875	8.40866	8.39879	3.60007e-06	0.00138025	4.28501e-08	5.86772e-06
1639270_at	13.3828	13.3813	13.5343	13.5437	13.3666	3.86833e-06	0.00154348	4.79417e-08	5.86772e-06
1630704_at	8.94103	8.70588	8.52577	8.44703	8.44957	3.97282e-06	0.00158915	4.93615e-08	5.86772e-06
1640978_at	8.95715	8.9773	9.10624	9.33934	9.16687	5.45296e-06	0.00232984	7.24318e-08	7.99514e-06
1638858_at	8.75002	8.72982	8.59675	8.60891	8.55218	5.84696e-06	0.00256077	7.96383e-08	8.20456e-06
1640174_at	10.7527	10.8737	11.0871	11.1309	11.1794	6.22912e-06	0.0027645	8.59901e-08	8.30526e-06
1632423_at	7.9756	7.98014	8.19968	8.23675	8.25121	6.95103e-06	0.00311867	9.70218e-08	8.81952e-06
1638630_at	9.18839	9.26737	9.44496	9.43084	9.41878	9.18403e-06	0.0044683	1.39178e-07	1.19488e-05
1637792_at	9.12012	8.92326	9.4771	9.31215	9.69142	9.74652e-06	0.00479866	1.49496e-07	1.21591e-05
1624580_at	8.86813	8.86	8.54847	9.04337	8.66169	1.03748e-05	0.00525223	1.63697e-07	1.26484e-05
1627167_a_at	10.3901	10.5135	10.8603	10.8433	10.745	1.1527e-05	0.00607708	1.89535e-07	1.39474e-05
1641370_s_at	9.99021	10.0317	10.3475	10.3577	10.2443	1.27582e-05	0.00689882	2.15259e-07	1.51204e-05
1625034_s_at	10.4559	10.5261	10.9065	11.0988	10.9993	1.39154e-05	0.00771223	2.40736e-07	1.61748e-05
1640194_a_at	10.8097	10.8664	11.234	11.264	11.2767	1.61037e-05	0.00922083	2.88007e-07	1.66976e-05
1625352_s_at	9.44794	9.54564	9.73142	9.84838	9.71457	1.62968e-05	0.00940168	2.93683e-07	1.66976e-05
1628458_at	10.2621	10.3478	10.6124	10.6573	11.0973	1.64701e-05	0.0095731	2.99085e-07	1.66976e-05
1633771_s_at	9.7571	9.84194	10.1887	10.456	10.4215	1.65352e-05	0.00962733	3.00798e-07	1.66976e-05
1640167_s_at	10.0718	10.0727	10.2965	10.2637	10.3835	1.65753e-05	0.00968257	3.02543e-07	1.66976e-05
1629247_at	8.90654	8.76219	8.35751	8.32153	8.29056	1.7201e-05	0.0101972	3.18713e-07	1.69835e-05
1624377_s_at	8.37594	8.42179	8.57785	8.76229	8.64001	1.84437e-05	0.011218	3.50792e-07	1.7617e-05
1641033_a_at	7.94335	7.82918	8.23145	8.33929	8.36768	1.89106e-05	0.0115929	3.62573e-07	1.7617e-05
1626461_at	9.72402	9.74341	10.1391	10.1115	10.3396	1.89965e-05	0.0116638	3.64802e-07	1.7617e-05
1626076_at	9.58767	9.75011	9.75847	9.74264	9.71456	2.08236e-05	0.0133658	4.18415e-07	1.87086e-05
1628447_at	8.7333	8.55301	8.35544	8.33476	8.29253	2.0861e-05	0.0134098	4.19805e-07	1.87086e-05
1625980_at	9.47162	9.29864	9.08786	8.99059	9.00918	2.09918e-05	0.0135342	4.23725e-07	1.87086e-05
1640846_at	8.60492	8.48946	8.27478	8.25046	8.25234	2.15977e-05	0.0141507	4.43165e-07	1.90234e-05
1627074_at	8.63381	8.64842	8.80092	8.885	8.83243	2.26787e-05	0.0151003	4.73081e-07	1.95734e-05
1627864_at	8.75957	8.79943	9.05729	9.11973	9.11048	2.3197e-05	0.0156232	4.89587e-07	1.95734e-05
1625840_at	8.82995	8.91373	9.0421	9.19768	9.14671	2.3371e-05	0.0157628	4.93977e-07	1.95734e-05
1625000_a_at	10.6853	10.775	11.0373	11.0434	10.9859	2.60984e-05	0.0182017	5.70838e-07	2.17081e-05
1638349_s_at	12.7868	12.8386	13.0429	13.0339	13.0517	2.62583e-05	0.0183634	5.75946e-07	2.17081e-05
1634520_at	8.05333	8.11278	8.38004	8.44146	8.48767	2.75592e-05	0.019563	6.13779e-07	2.22786e-05
1634649_at	9.23718	9.32361	9.45617	9.52512	9.60588	2.77329e-05	0.0197573	6.19915e-07	2.22786e-05
1627829_at	11.8714	12.0501	12.2033	12.3143	12.3185	2.93698e-05	0.0212921	6.68343e-07	2.23535e-05
1641004_a_at	11.9067	12.0359	12.3218	12.2768	12.2729	2.9449e-05	0.0214107	6.72129e-07	2.23535e-05
1639851_at	9.80605	9.67956	9.30293	9.28619	9.19642	3.01139e-05	0.0219228	6.88228e-07	2.23535e-05
1630749_at	8.62355	8.64059	8.76386	8.96006	8.90547	3.04883e-05	0.0223117	7.00525e-07	2.23535e-05
1641326_at	9.9589	9.95822	10.2737	10.341	10.3649	3.062e-05	0.0224373	7.04491e-07	2.23535e-05
1624611_a_at	12.468	12.6172	12.8582	12.8682	12.6057	3.06433e-05	0.0225714	7.08788e-07	2.23535e-05
1629869_s_at	10.9296	11.0464	11.3128	11.3524	11.2966	3.13106e-05	0.0232718	7.30945e-07	2.25912e-05
1634184_a_at	8.31601	8.32245	8.59903	8.67373	8.92138	3.18783e-05	0.0237849	7.47132e-07	2.26387e-05
1630981_at	10.2544	10.3518	10.6577	10.7201	10.6856	3.27352e-05	0.0247986	7.79266e-07	2.31583e-05
1623573_s_at	10.2784	10.3361	10.6759	10.7253	10.6856	3.44056e-05	0.0265553	8.34862e-07	2.42046e-05
1638315_s_at	9.53463	9.62382	9.71199	9.71893	9.68737	3.46491e-05	0.0269002	8.458e-07	2.42046e-05
1636265_s_at	8.2719	8.29167	8.63263	8.69541	8.71542	3.6235e-05	0.0285536	8.98166e-07	2.48739e-05
1628160_a_at	8.6641	8.72478	9.06021	9.11574	9.14469	3.63001e-05	0.0287079	9.03105e-07	2.48739e-05
1625261_x_at	8.72279	8.66938	8.50825	8.47407	8.48004	3.67418e-05	0.0291619	9.17474e-07	2.48739e-05
1640774_a_at	10.615	10.7463	11.1284	11.2124	11.6135	3.74289e-05	0.0299561	9.42669e-07	2.50397e-05
1625658_at	8.5412	8.65258	9.17185	9.1847	9.01917	3.78659e-05	0.0303778	9.55998e-07	2.50397e-05
1631608_at	8.51017	8.54878	8.85175	8.93923	8.95504	3.87812e-05	0.0317009	9.98141e-07	2.57078e-05
1640059_at	8.94619	9.03154	9.27688	9.26897	9.48281	3.96248e-05	0.0325905	1.02631e-06	2.6e-05
1629066_at	8.16321	8.2378	8.64779	8.5289	8.75562	4.19068e-05	0.0349313	1.10044e-06	2.74283e-05
1626133_s_at	9.63879	9.78986	10.0493	10.0585	9.78203	4.34703e-05	0.0366464	1.15483e-06	2.75542e-05
1626143_a_at	8.71854	8.74435	8.93852	8.95868	8.93141	4.38114e-05	0.0371827	1.17196e-06	2.75542e-05
1630857_s_at	11.3164	11.4326	11.5934	11.6295	11.6562	4.38114e-05	0.037142	1.17064e-06	2.75542e-05
1624744_a_at	10.6709	10.8458	11.0812	11.1533	11.1966	4.38831e-05	0.0373343	1.17681e-06	2.75542e-05
1635177_at	9.66509	9.81373	10.1876	10.028	10.1561	4.53092e-05	0.0390541	1.23148e-06	2.81996e-05
1640950_at	9.82605	9.97458	10.216	10.2421	10.2026	4.55514e-05	0.0394782	1.24506e-06	2.81996e-05
1623013_s_at	10.0155	10.1227	10.3523	10.3676	10.3411	4.59374e-05	0.0399218	1.25912e-06	2.81996e-05
1634054_at	11.388	11.5262	11.8328	11.8759	11.8186	4.65188e-05	0.0405365	1.27863e-06	2.82274e-05
1626740_at	12.7961	12.804	13.2954	13.1928	13.042	4.79039e-05	0.0421056	1.32846e-06	2.88983e-05
1625334_at	11.9745	12.1113	12.2826	12.2826	12.2223	4.82118e-05	0.0428113	1.35111e-06	2.88983e-05
1630922_at	8.50476	8.42556	8.21063	8.12791	8.18178	4.85809e-05	0.043251	1.36512e-06	2.88983e-05
1623807_a_at	9.06926	9.09518	9.46871	9.49599	9.67053	4.99875e-05	0.044692	1.41078e-06	2.93258e-05
1636436_at	10.8673	11.0034	11.3004	11.2827	11.2538	5.02119e-05	0.0450822	1.42327e-06	2.93258e-05
1629920_at	9.98793	10.067	10.3898	10.4319	10.4418	5.25645e-05	0.0479206	1.51355e-06	3.07757e-05
1627452_a_at	9.00143	9.02394	9.15771	9.20474	9.24871	5.32889e-05	0.0490001	1.54809e-06	3.10692e-05
1624335_at	8.54244	8.56397	8.73139	8.75669	8.65961	5.5125e-05	0.0518299	1.63863e-06	3.18996e-05
1636406_at	8.92738	8.949	9.10143	9.14768	9.16341	5.56008e-05	0.0524342	1.65789e-06	3.18996e-05
1626079_a_at	10.4175	10.4949	10.8046	10.8533	10.7907	5.57739e-05	0.0527816	1.66898e-06	3.18996e-05
1636137_at	8.50752	8.52207	8.69307	8.72386	8.74028	5.61851e-05	0.0535662	1.69428e-06	3.18996e-05
1632689_at	9.9469	10.032	10.1918	10.2623	10.17	5.6272e-05	0.0539008	1.70507e-06	3.18996e-05
1635358_at	8.88924	8.96363	9.06858	9.08178	9.08225	5.63581e-05	0.0541547	1.71332e-06	3.18996e-05
1631569_s_at	11.6873	11.8415	12.1464	12.1161	12.2003	5.85311e-05	0.0569021	1.80093e-06	3.31316e-05
1639952_at	11.4895	11.5974	11.8344	11.8498	11.7748	5.97386e-05	0.0588123	1.86215e-06	3.38548e-05
1635711_s_at	10.3045	10.3714	10.7667	10.8318	10.9105	6.05701e-05	0.0602106	1.90703e-06	3.38956e-05
1641336_at	8.76655	8.8079	8.91857	8.95608	8.91999	6.05701e-05	0.0602476	1.90826e-06	3.38956e-05
1636418_s_at	8.31419	8.3698	8.58088	8.61857	8.65707	6.11422e-05	0.0612519	1.9405e-06	3.40766e-05
1629309_at	8.86245	8.9591	9.31041	9.29274	9.21788	6.47204e-05	0.0661739	2.0979e-06	3.61141e-05
1636465_at	8.55334	8.6056	8.72869	8.71689	8.70931	6.55592e-05	0.0672352	2.13181e-06	3.61141e-05
1635981_a_at	10.7283	10.7347	11.183	11.2353	11.2866	6.56057e-05	0.0673442	2.13533e-06	3.61141e-05
1641459_at	9.98599	10.0707	10.3907	10.4035	10.3945	6.596e-05	0.067805	2.15001e-06	3.61141e-05
1623475_s_at	11.2214	11.2015	11.5473	11.5914	11.5891	6.75233e-05	0.0698175	2.21432e-06	3.62883e-05
1624877_at	11.9341	12.0471	12.3062	12.3379	12.3005	6.839e-05	0.0709157	2.24936e-06	3.62883e-05
1637560_at	10.1651	10.2474	10.6463	10.7441	10.7832	6.839e-05	0.0709692	2.25113e-06	3.62883e-05
1633632_at	8.65789	8.69379	8.91004	8.94221	8.88583	6.94183e-05	0.0724253	2.29776e-06	3.62883e-05
1637671_a_at	11.4538	11.5429	11.7849	11.8302	11.8455	6.94183e-05	0.0723665	2.29582e-06	3.62883e-05
1640110_at	8.61855	8.69822	8.78781	8.82897	8.82883	6.99343e-05	0.0732902	2.32557e-06	3.62883e-05
1638447_s_at	8.84455	8.82352	8.95714	8.96934	8.9375	7.04639e-05	0.0741508	2.35317e-06	3.62883e-05
1640375_at	9.94856	10.049	10.2982	10.2799	10.0368	7.04639e-05	0.0741003	2.3515e-06	3.62883e-05
1637465_at	8.37312	8.3718	8.57168	8.58072	8.20714	7.09178e-05	0.0747307	2.37172e-06	3.62883e-05
1635256_s_at	10.5505	10.6411	10.9306	10.9105	10.938	7.24061e-05	0.0769224	2.44198e-06	3.69186e-05
1626367_at	10.0265	10.1224	10.2305	10.2507	10.2089	7.27553e-05	0.0778753	2.47294e-06	3.69186e-05
1641347_s_at	11.6723	11.76	11.9852	12.059	12.0518	7.35604e-05	0.0792169	2.5161e-06	3.69186e-05
1640924_a_at	9.2505	9.29689	9.46648	9.52912	9.51282	7.48241e-05	0.0809263	2.5708e-06	3.69186e-05
1625801_s_at	11.3604	11.4757	11.7897	11.7852	11.7536	7.5374e-05	0.0817316	2.59663e-06	3.69186e-05
1634466_at	8.94112	9.02229	9.12264	9.18839	9.19165	7.56271e-05	0.0822351	2.6128e-06	3.69186e-05
1633959_s_at	9.91066	9.91749	10.0839	10.3776	10.1991	7.58959e-05	0.0827215	2.62858e-06	3.69186e-05
1632355_at	9.24832	9.30434	9.53365	9.59193	9.59338	7.64095e-05	0.0834234	2.65106e-06	3.69186e-05
1624386_at	9.29842	9.37886	9.59025	9.60784	9.58537	7.69188e-05	0.0841942	2.6758e-06	3.69186e-05
1636055_at	8.7783	8.87458	9.08604	9.0549	8.6465	7.70278e-05	0.0843852	2.68196e-06	3.69186e-05
1625785_at	7.98165	8.0139	8.21045	8.2898	8.28387	7.72881e-05	0.0849361	2.69973e-06	3.69186e-05
1633253_s_at	10.3092	10.3803	10.7116	10.7022	10.6886	7.7346e-05	0.0853813	2.71439e-06	3.69186e-05
1633962_a_at	9.74966	9.85223	10.1784	10.1437	10.129	7.86099e-05	0.0878557	2.7943e-06	3.69186e-05
1625477_a_at	9.42285	9.56871	9.72787	9.79365	9.72792	7.87572e-05	0.0881101	2.80257e-06	3.69186e-05
1624705_a_at	9.98906	10.1335	10.4949	10.5285	10.5802	7.90344e-05	0.0885573	2.81689e-06	3.69186e-05
1629967_s_at	8.66893	8.74383	8.89762	8.89478	8.9156	7.98936e-05	0.0898267	2.85772e-06	3.69186e-05
1628399_s_at	10.9356	11.0441	11.35	11.4075	11.3741	8.00372e-05	0.0901304	2.86747e-06	3.69186e-05
1640458_at	11.0033	11.2203	11.5189	11.3963	11.7031	8.04136e-05	0.09071	2.88619e-06	3.69186e-05
1627888_at	8.73504	8.81045	9.02765	9.12495	9.10594	8.04744e-05	0.0910153	2.89599e-06	3.69186e-05
1633145_at	9.02661	9.26166	9.05586	9.11045	9.0462	8.13911e-05	0.0927189	2.95123e-06	3.69186e-05
1628829_at	8.67465	8.51896	8.31017	8.24811	8.25032	8.15494e-05	0.0930505	2.96198e-06	3.69186e-05
1638682_a_at	8.14507	8.12392	8.43098	8.49122	8.55137	8.20287e-05	0.093793	2.9858e-06	3.69186e-05
1633375_at	8.22714	8.2467	8.57037	8.64728	8.71096	8.30125e-05	0.0952587	3.03295e-06	3.69186e-05
1627840_a_at	9.6219	9.69342	9.94175	10.0104	9.97994	8.30533e-05	0.0953825	3.03698e-06	3.69186e-05
1641170_a_at	9.94792	9.96289	10.3871	10.3868	10.4553	8.30641e-05	0.0955489	3.04247e-06	3.69186e-05
1636374_at	11.9524	12.0684	12.2792	12.3276	12.2581	8.38382e-05	0.0969831	3.08883e-06	3.69186e-05
1636741_s_at	9.41078	9.50207	9.83465	9.85941	9.88742	8.39711e-05	0.0972924	3.09888e-06	3.69186e-05
1639461_a_at	9.05392	9.12547	9.31444	9.40048	9.37329	8.48367e-05	0.0984525	3.13603e-06	3.69186e-05
1627012_at	8.7962	8.65873	8.35502	8.29218	8.26792	8.4878e-05	0.098579	3.14016e-06	3.69186e-05
1624989_s_at	12.9306	13.0606	13.2104	13.2528	13.2253	8.61257e-05	0.100798	3.21178e-06	3.69186e-05
1635006_at	11.0982	11.2604	11.4505	11.474	11.3634	8.61257e-05	0.100525	3.20277e-06	3.69186e-05
1637051_at	8.13078	8.10477	8.42694	8.21524	7.96321	8.61257e-05	0.100689	3.20808e-06	3.69186e-05
1639983_at	8.16969	8.19827	8.0023	7.98438	8.01665	8.61257e-05	0.100825	3.21274e-06	3.69186e-05
1624083_s_at	11.3714	11.3974	11.7623	11.7609	11.855	8.63172e-05	0.101209	3.22518e-06	3.69186e-05
1627059_at	10.5672	10.6594	10.9122	10.9338	10.9698	8.71552e-05	0.102434	3.26451e-06	3.7094e-05
1627102_at	11.8677	12.0118	12.3263	12.3569	12.3007	8.82918e-05	0.104341	3.32604e-06	3.71983e-05
1636101_a_at	10.542	10.6119	11.0157	11.08	11.0795	8.8871e-05	0.105108	3.35059e-06	3.71983e-05
1624324_a_at	11.3222	11.3752	11.693	11.6665	11.6782	8.96178e-05	0.106323	3.38974e-06	3.71983e-05
1636152_a_at	8.68583	8.73338	9.02127	9.12611	9.16665	9.01659e-05	0.107306	3.42154e-06	3.71983e-05
1628448_at	8.45434	8.47583	8.4394	8.36862	8.42287	9.02693e-05	0.107513	3.42823e-06	3.71983e-05
1625453_a_at	10.3413	10.4697	10.7316	10.7574	10.758	9.1532e-05	0.109186	3.4818e-06	3.71983e-05
1624164_s_at	8.81557	8.93992	9.28409	9.37839	9.50315	9.41806e-05	0.114174	3.64318e-06	3.71983e-05
1627916_s_at	10.6188	10.6627	10.9336	10.9458	10.9861	9.41806e-05	0.113997	3.63732e-06	3.71983e-05
1639375_a_at	9.41127	9.45945	9.65481	9.71116	9.68009	9.41806e-05	0.113961	3.63606e-06	3.71983e-05
1625488_s_at	11.0476	11.1381	11.453	11.4833	11.5051	9.48546e-05	0.115251	3.67802e-06	3.71983e-05
1626492_s_at	10.0784	10.1791	10.3974	10.4403	10.4711	9.54102e-05	0.116278	3.71127e-06	3.71983e-05
1625899_at	8.87245	8.72496	8.46579	8.42938	8.41961	9.55725e-05	0.116652	3.72345e-06	3.71983e-05
1625458_a_at	9.72362	9.80675	10.217	10.2656	10.2925	9.55974e-05	0.116771	3.72735e-06	3.71983e-05
1630410_at	8.65516	8.73918	9.00391	8.92645	8.85679	9.56964e-05	0.117138	3.73931e-06	3.71983e-05
1640051_s_at	10.8037	10.8847	11.1966	11.2836	11.2797	9.56964e-05	0.117156	3.74002e-06	3.71983e-05
1636354_at	8.92654	8.98692	9.26091	9.25554	9.26797	9.57599e-05	0.11741	3.74838e-06	3.71983e-05
1639666_at	8.28617	8.33094	8.4834	8.57192	8.6401	9.6768e-05	0.118914	3.79675e-06	3.71983e-05
1636693_at	9.09171	9.18232	9.35091	9.39783	9.37141	9.71479e-05	0.11947	3.81463e-06	3.71983e-05
1623792_a_at	9.52111	9.62368	10.0254	10.0323	9.9987	9.77403e-05	0.120698	3.8543e-06	3.71983e-05
1636539_at	11.103	11.2414	11.4839	11.4988	11.4315	9.77403e-05	0.120739	3.85588e-06	3.71983e-05
1629759_at	11.2314	11.3505	11.6411	11.6666	11.6159	9.84841e-05	0.122293	3.90637e-06	3.71983e-05
1624119_at	11.1533	11.2332	11.5851	11.6281	11.6358	9.91712e-05	0.123515	3.94592e-06	3.71983e-05
1634217_s_at	10.9805	11.0972	11.4028	11.4315	11.4372	9.91712e-05	0.123603	3.94884e-06	3.71983e-05
1634521_at	8.21093	8.17331	8.44359	8.40689	8.48021	9.95369e-05	0.125066	3.99699e-06	3.71983e-05
1633008_at	8.97333	9.02238	9.1614	9.20055	9.20735	9.9654e-05	0.125327	4.00545e-06	3.71983e-05
1641026_a_at	10.3515	10.4719	10.8478	10.9318	10.9198	9.9654e-05	0.125763	4.02003e-06	3.71983e-05
1625209_at	8.92381	8.83441	8.61064	8.52026	8.5463	0.000100211	0.126834	4.05479e-06	3.71983e-05
1634044_at	7.96331	7.93696	8.11291	8.20537	8.2421	0.000101055	0.128646	4.11376e-06	3.71983e-05
1635978_at	11.9046	11.9955	12.2366	12.2235	12.2535	0.000101945	0.13034	4.16876e-06	3.71983e-05
1637957_s_at	11.2008	11.2153	11.668	11.7194	11.7503	0.00010268	0.131846	4.21771e-06	3.71983e-05
1623722_at	8.80116	8.93508	9.36325	9.37953	9.50452	0.000103002	0.132637	4.24357e-06	3.71983e-05
1626183_at	7.98973	7.98088	8.16025	8.22726	8.20109	0.000104224	0.134497	4.30348e-06	3.71983e-05
1627834_a_at	9.34002	9.38079	9.58357	9.64966	9.63184	0.000104487	0.134932	4.31756e-06	3.71983e-05
1641502_a_at	10.2864	10.3934	10.6142	10.6345	10.5318	0.000104668	0.135358	4.33146e-06	3.71983e-05
1635135_at	8.96569	9.117	9.38174	9.52861	9.52651	0.000105503	0.136535	4.36925e-06	3.71983e-05
1634757_a_at	12.0623	12.1153	12.415	12.4356	12.5207	0.000105794	0.137009	4.38457e-06	3.71983e-05
1637767_at	12.3518	12.4496	12.6757	12.7022	12.7173	0.000105963	0.137335	4.39514e-06	3.71983e-05
1640288_s_at	10.2273	10.2919	10.6246	10.6297	10.666	0.000105963	0.137519	4.40132e-06	3.71983e-05
1633745_a_at	10.6753	10.7128	11.056	11.0993	11.1581	0.000106067	0.137752	4.4089e-06	3.71983e-05
1634895_s_at	11.1394	11.2256	11.5571	11.608	11.5091	0.000106273	0.138116	4.42069e-06	3.71983e-05
1625197_at	9.63045	9.74229	10.0682	10.2928	10.2444	0.000106558	0.138712	4.43991e-06	3.71983e-05
1633731_at	9.15692	9.23381	9.68326	9.78056	9.7251	0.000106558	0.138975	4.44892e-06	3.71983e-05
1629065_s_at	12.2017	12.3394	12.5425	12.6005	12.5912	0.000106595	0.139219	4.45701e-06	3.71983e-05
1629077_s_at	10.2017	10.355	10.6687	10.7373	10.6946	0.000106652	0.139454	4.46468e-06	3.71983e-05
1641047_at	10.4648	10.5801	10.8622	10.8991	10.8877	0.000106652	0.139488	4.46592e-06	3.71983e-05
1629540_a_at	9.34713	9.37468	9.62962	9.6862	9.6413	0.000106917	0.140042	4.48379e-06	3.71983e-05
1630585_s_at	9.26508	9.3954	9.77526	9.71813	9.72045	0.000107878	0.14192	4.54477e-06	3.71983e-05
1633788_s_at	8.29098	8.33139	8.65242	8.82259	8.8295	0.000107966	0.142197	4.55408e-06	3.71983e-05
1623432_s_at	8.61459	8.62851	8.96279	9.03288	9.03128	0.000108844	0.144105	4.6161e-06	3.71983e-05
1627320_at	8.10891	8.12911	8.42491	8.52908	8.51946	0.000108844	0.14417	4.61848e-06	3.71983e-05
1631308_at	10.2774	10.3394	10.7035	10.7064	10.7677	0.000108844	0.143974	4.61176e-06	3.71983e-05
1633798_at	10.8705	10.9737	11.3007	11.3574	11.3582	0.00010892	0.144549	4.63105e-06	3.71983e-05
1636390_at	8.83082	8.79	8.55855	8.49021	8.50262	0.000108958	0.144899	4.64271e-06	3.71983e-05
1629305_at	8.83445	8.86461	9.00403	9.00131	9.01506	0.000109248	0.145584	4.66512e-06	3.71983e-05
1629218_at	8.36051	8.36728	8.64885	8.67314	8.78234	0.000109323	0.145785	4.67168e-06	3.71983e-05
1635126_a_at	10.5841	10.5756	10.8983	10.9805	10.9916	0.000109885	0.146734	4.7024e-06	3.71983e-05
1631666_s_at	8.57523	8.55175	8.75682	8.81795	8.76718	0.00011013	0.147363	4.72303e-06	3.71983e-05
1629172_s_at	7.85079	7.86932	8.0613	8.03661	8.13383	0.000110633	0.149511	4.79386e-06	3.71983e-05
1633983_a_at	10.3978	10.5151	10.845	10.9519	10.9633	0.000110633	0.149553	4.79552e-06	3.71983e-05
1624857_at	8.27598	8.25235	8.86241	8.91885	9.03029	0.000110853	0.150052	4.81184e-06	3.71983e-05
1625914_at	8.24282	8.23845	8.08339	8.03719	8.05316	0.000110853	0.149993	4.80979e-06	3.71983e-05
1635305_s_at	9.16715	9.21962	9.58404	9.63818	9.68278	0.000111274	0.150827	4.83697e-06	3.71983e-05
1641408_at	10.2136	10.3099	10.5893	10.5786	10.5734	0.000111337	0.151318	4.85337e-06	3.71983e-05
1641071_at	12.9223	13.0768	13.3512	13.3138	13.3051	0.000112251	0.152765	4.90007e-06	3.71983e-05
1637059_s_at	10.8143	10.9423	11.139	11.1333	11.0763	0.00011386	0.155683	4.9948e-06	3.71983e-05
1627221_at	9.47442	9.52505	9.81853	9.84176	9.89379	0.000113885	0.156389	5.01842e-06	3.71983e-05
1635635_a_at	11.8973	12.0507	12.3614	12.4202	12.5049	0.000113885	0.156036	5.00629e-06	3.71983e-05
1636426_at	10.991	11.1233	11.3925	11.3586	11.3134	0.000113885	0.156099	5.00846e-06	3.71983e-05
1638735_at	10.3514	10.5093	10.849	10.8744	10.8866	0.000113885	0.156322	5.01595e-06	3.71983e-05
1627142_at	9.80321	9.85942	10.1439	10.145	10.1462	0.00011401	0.156788	5.03154e-06	3.71983e-05
1632675_s_at	10.3604	10.4127	10.7202	10.7973	10.8224	0.000114766	0.157967	5.06971e-06	3.71983e-05
1629851_at	9.13761	9.13085	9.57529	9.63721	9.59286	0.00011483	0.158359	5.0826e-06	3.71983e-05
1636176_at	10.3381	10.4636	10.7242	10.7134	10.7135	0.00011483	0.158551	5.08895e-06	3.71983e-05
1633606_s_at	11.1429	11.2278	11.4495	11.4191	11.36	0.000115139	0.159632	5.12478e-06	3.71983e-05
1640242_s_at	8.87773	8.89654	9.4156	9.37096	9.36298	0.000115139	0.159636	5.12507e-06	3.71983e-05
1623039_at	9.79317	9.79582	10.2092	10.2458	10.2606	0.000115506	0.160776	5.16267e-06	3.71983e-05
1634405_s_at	8.55276	8.61822	9.07373	9.16396	9.24483	0.000115619	0.161038	5.17127e-06	3.71983e-05
1630817_s_at	9.06098	9.11324	9.5072	9.53143	9.55733	0.000116032	0.161719	5.19328e-06	3.71983e-05
1630603_at	9.17157	9.23583	9.51682	9.56534	9.54455	0.000116436	0.162812	5.22923e-06	3.71983e-05
1630577_at	8.05192	8.00246	8.44328	8.54912	8.66257	0.000117514	0.165248	5.30883e-06	3.71983e-05
1627239_s_at	10.1792	10.243	10.4619	10.5531	10.5679	0.000117644	0.165571	5.31956e-06	3.71983e-05
1626884_a_at	9.56229	9.70165	9.99126	10.0628	10.1085	0.000117871	0.166213	5.34068e-06	3.71983e-05
1635807_at	11.0174	11.1076	11.4099	11.4158	11.3708	0.000118197	0.166887	5.36268e-06	3.71983e-05
1629221_at	8.89253	8.90144	9.14833	9.18905	9.22109	0.000118539	0.167693	5.38911e-06	3.71983e-05
1631129_at	7.94744	7.91561	8.0783	8.10444	8.12853	0.000118947	0.168617	5.41932e-06	3.71983e-05
1632471_at	8.7796	8.79225	9.13365	9.16867	9.22245	0.000118947	0.168704	5.42229e-06	3.71983e-05
1628601_at	9.35056	9.45241	9.66263	9.7112	9.68677	0.000119346	0.17014	5.46968e-06	3.71983e-05
1632099_s_at	8.38528	8.50199	8.78982	8.92051	8.84659	0.000119346	0.169637	5.45265e-06	3.71983e-05
1639046_at	9.58722	9.58512	9.47202	9.49678	9.38125	0.000119346	0.169734	5.45593e-06	3.71983e-05
1640201_at	12.4707	12.5608	12.7834	12.8457	12.7351	0.000119346	0.169967	5.46359e-06	3.71983e-05
1639136_s_at	9.09769	9.12062	9.47989	9.5249	9.55378	0.000119402	0.170325	5.47598e-06	3.71983e-05
1624285_at	12.7447	12.8664	13.0941	13.0943	13.0797	0.000119445	0.170695	5.48824e-06	3.71983e-05
1636206_at	11.837	12.084	12.2934	12.2494	12.2222	0.000120902	0.173364	5.57496e-06	3.73369e-05
1630637_s_at	13.0868	13.1	13.2822	13.3156	13.2723	0.000121876	0.175512	5.6453e-06	3.73369e-05
1640915_at	10.7058	10.8423	11.0876	11.1754	11.1558	0.000121876	0.175514	5.64552e-06	3.73369e-05
1628184_at	8.79043	8.80668	9.02095	9.0235	8.96923	0.000122493	0.176958	5.69291e-06	3.73369e-05
1627179_s_at	8.21399	8.24809	8.52179	8.60797	8.5799	0.000122658	0.177531	5.71187e-06	3.73369e-05
1624693_at	10.6879	10.8043	11.0852	11.1368	11.0918	0.000122669	0.177657	5.71611e-06	3.73369e-05
1633209_s_at	11.1831	11.2388	11.5672	11.5381	11.546	0.000122842	0.178019	5.72797e-06	3.73369e-05
1626665_at	8.13147	8.17428	8.47929	8.53058	8.6225	0.000122979	0.178329	5.73813e-06	3.73369e-05
1623561_at	8.49708	8.45287	8.28806	8.23777	8.24589	0.00012302	0.1785	5.74381e-06	3.73369e-05
1624775_at	8.9168	8.97496	9.06818	9.07034	9.09484	0.000123326	0.179532	5.77775e-06	3.73369e-05
1623967_at	8.94283	8.99721	9.22384	9.26242	9.21993	0.000123505	0.180099	5.79675e-06	3.73369e-05
1631675_a_at	11.045	11.099	11.3685	11.3921	11.3568	0.000123896	0.181006	5.82651e-06	3.73369e-05
1639032_at	8.7652	8.85125	8.92143	8.93295	8.94653	0.00012398	0.181242	5.83428e-06	3.73369e-05
1623847_at	8.66901	8.73164	8.94023	9.00276	9.0173	0.000124046	0.181674	5.84856e-06	3.73369e-05
1634577_s_at	11.334	11.4506	11.6821	11.7339	11.6469	0.000124572	0.182896	5.88885e-06	3.73369e-05
1638667_a_at	10.8759	10.9963	11.1022	11.1611	11.1097	0.000124627	0.183089	5.89527e-06	3.73369e-05
1635334_a_at	8.81114	8.81944	9.10644	9.10107	9.09441	0.000126411	0.186283	5.99905e-06	3.75847e-05
1624520_a_at	8.57192	8.50339	8.90234	9.0583	9.0285	0.000126855	0.187167	6.02793e-06	3.75847e-05
1641193_s_at	10.6122	10.682	11.0237	11.054	11.0734	0.000127021	0.187643	6.04363e-06	3.75847e-05
1630276_at	9.39936	9.49704	9.87285	9.91187	9.89391	0.000127139	0.188047	6.05704e-06	3.75847e-05
1629578_at	11.2058	11.3584	11.671	11.6801	11.6165	0.000127382	0.188754	6.08032e-06	3.75847e-05
1630996_s_at	9.43227	9.45444	9.63199	9.67609	9.66597	0.000127382	0.188754	6.0802e-06	3.75847e-05
1623305_at	7.51218	7.59516	7.6571	7.79977	7.80049	0.000128345	0.190892	6.15048e-06	3.77812e-05
1640089_at	9.48664	9.51014	9.77826	9.84022	9.8418	0.000128397	0.191207	6.16101e-06	3.77812e-05
1628404_at	11.0659	11.2	11.4105	11.3586	11.3274	0.000129561	0.194089	6.25588e-06	3.81645e-05
1630688_at	11.3175	11.3153	11.6694	11.7494	11.7455	0.000130171	0.19606	6.32127e-06	3.81645e-05
1636844_at	8.56674	8.61811	8.75821	8.81935	8.82013	0.000130171	0.195875	6.3149e-06	3.81645e-05
1626449_s_at	11.6544	11.7633	12.0463	12.0906	12.0649	0.00013074	0.197154	6.35694e-06	3.81645e-05
1637545_at	9.63539	9.74432	9.96399	10.0172	10.0041	0.000130911	0.197529	6.36924e-06	3.81645e-05
1631564_at	8.70036	8.79314	9.14108	9.20861	9.32355	0.000131113	0.198145	6.38952e-06	3.81645e-05
1635260_at	9.69918	9.71742	10.1654	10.2368	10.1763	0.000131677	0.199517	6.43478e-06	3.81645e-05
1633625_s_at	10.1395	10.2518	10.5397	10.6363	10.6249	0.000132315	0.200603	6.47002e-06	3.81645e-05
1626294_a_at	9.32144	9.29865	9.76354	9.88137	9.87599	0.000132755	0.201629	6.50376e-06	3.81645e-05
1627206_at	11.1936	11.301	11.6754	11.6978	11.713	0.000132834	0.202113	6.51979e-06	3.81645e-05
1635861_a_at	10.1392	10.1661	10.4771	10.5251	10.5281	0.000132834	0.202113	6.51986e-06	3.81645e-05
1639305_a_at	9.04377	9.05497	9.32138	9.35959	9.37439	0.000132834	0.201876	6.51192e-06	3.81645e-05
1638464_a_at	10.2669	10.3072	10.6739	10.6413	10.6687	0.000133119	0.203045	6.55069e-06	3.82002e-05
1624782_a_at	11.0625	11.2387	11.4666	11.4686	11.3955	0.000134006	0.2051	6.61849e-06	3.84116e-05
1629970_s_at	11.5605	11.6933	11.8711	11.8817	11.8765	0.00013504	0.207657	6.70272e-06	3.84116e-05
1636585_a_at	10.3794	10.4554	10.7992	10.8653	10.893	0.000135377	0.208418	6.72771e-06	3.84116e-05
1627571_at	8.47739	8.56512	8.93327	9.01869	9.06286	0.00013544	0.20865	6.73541e-06	3.84116e-05
1635644_at	9.48036	9.55483	9.92857	9.97624	9.96449	0.00013544	0.20876	6.7392e-06	3.84116e-05
1628616_at	8.72809	8.77647	8.91321	8.95287	8.93309	0.000135753	0.209486	6.76307e-06	3.84116e-05
1641476_a_at	10.1966	10.291	10.5993	10.5697	10.5539	0.000135753	0.209382	6.7595e-06	3.84116e-05
1626177_s_at	9.91206	9.96235	10.2263	10.2536	10.2545	0.00013608	0.210359	6.7919e-06	3.84116e-05
1623017_at	10.2455	10.3326	10.6228	10.6029	10.5802	0.000136356	0.211345	6.82462e-06	3.84116e-05
1641105_at	8.56106	8.60978	8.7925	8.74969	8.67778	0.000136451	0.211668	6.8355e-06	3.84116e-05
1626615_at	8.34846	8.38977	8.63736	8.64837	8.67262	0.000139686	0.217991	7.04174e-06	3.93352e-05
1639752_at	8.06727	8.10648	8.4023	8.43217	8.50632	0.000140384	0.219411	7.08852e-06	3.93352e-05
1628856_at	9.26686	9.28692	9.68833	9.76679	9.68606	0.000140388	0.219779	7.10088e-06	3.93352e-05
1639086_s_at	11.7263	11.8368	12.0294	12.0531	12.0249	0.000140388	0.219797	7.10168e-06	3.93352e-05
1623739_at	11.2971	11.3649	11.7243	11.6756	11.7271	0.0001413	0.2221	7.17748e-06	3.93686e-05
1633407_at	9.01233	9.12987	9.44755	9.51912	9.54202	0.0001413	0.221505	7.15732e-06	3.93686e-05
1630119_s_at	10.9996	11.0617	11.55	11.606	11.6297	0.000141333	0.222291	7.18413e-06	3.93686e-05
1626988_at	9.74405	9.87178	10.2168	10.2212	10.2008	0.000141781	0.223379	7.21999e-06	3.94253e-05
1623455_s_at	8.59077	8.61813	8.99438	9.03072	9.06039	0.000142349	0.224657	7.262e-06	3.94454e-05
1638727_at	11.0593	11.0675	11.3626	11.4062	11.3803	0.000142513	0.225043	7.27472e-06	3.94454e-05
1622920_at	12.9093	12.9882	13.1584	13.2089	13.1659	0.000143773	0.227942	7.36984e-06	3.94702e-05
1636463_at	8.00968	8.01437	7.80623	7.77304	7.746	0.000143773	0.227587	7.35765e-06	3.94702e-05
1641169_s_at	11.1369	11.2438	11.5598	11.5592	11.5862	0.000143773	0.227928	7.36915e-06	3.94702e-05
1624208_s_at	9.4286	9.50615	9.97247	10.0181	10.0853	0.000144167	0.22882	7.39895e-06	3.94702e-05
1629059_at	8.35752	8.40831	8.25104	8.235	8.13188	0.000144215	0.229155	7.41027e-06	3.94702e-05
1633651_at	9.07306	9.14544	9.59873	9.6498	9.66446	0.000144603	0.23042	7.45237e-06	3.94702e-05
1630658_at	9.47375	9.58193	9.83182	9.8699	9.89892	0.000144627	0.230589	7.45808e-06	3.94702e-05
1631597_at	8.7356	8.77743	9.12556	9.15309	9.15366	0.000145599	0.232399	7.51712e-06	3.95003e-05
1638319_at	11.7901	11.864	12.1714	12.2447	12.164	0.000145717	0.232888	7.5334e-06	3.95003e-05
1641747_s_at	9.24572	9.34151	9.78658	9.81167	9.85513	0.000145876	0.233365	7.54933e-06	3.95003e-05
1640178_at	10.1443	10.2238	10.5093	10.56	10.5171	0.00014796	0.237494	7.68438e-06	3.95003e-05
1634325_a_at	9.9987	10.0622	10.6485	10.7113	10.7761	0.000148347	0.23878	7.72727e-06	3.95003e-05
1626902_a_at	10.9449	11.0832	11.3571	11.3848	11.3964	0.000148504	0.239299	7.74455e-06	3.95003e-05
1633313_at	11.5798	11.5828	12.0546	12.1566	12.2045	0.000148852	0.240526	7.78554e-06	3.95003e-05
1641400_at	9.68981	9.71242	9.89931	10.0004	9.95372	0.000149051	0.240981	7.80051e-06	3.95003e-05
1634630_at	9.60988	9.75491	10.0493	9.92263	9.95923	0.000149124	0.241233	7.8089e-06	3.95003e-05
1637033_at	8.29573	8.37593	8.50126	8.53601	8.56688	0.000149261	0.241721	7.82523e-06	3.95003e-05
1640150_s_at	13.0037	13.0308	13.1793	13.1988	13.1984	0.000149314	0.242208	7.84176e-06	3.95003e-05
1636321_s_at	9.06321	9.07216	9.49279	9.58672	9.59341	0.00015002	0.243717	7.8911e-06	3.95003e-05
1631741_a_at	8.76657	8.78354	8.95383	9.02232	8.98033	0.000150539	0.245138	7.93841e-06	3.95003e-05
1628041_a_at	9.62779	9.74416	10.075	10.1634	10.1531	0.00015143	0.24735	8.01108e-06	3.95003e-05
1629983_at	9.08686	9.04059	9.27999	9.3684	9.36515	0.00015143	0.247539	8.01772e-06	3.95003e-05
1635011_at	10.8484	11.0344	11.2256	11.2016	11.1879	0.00015143	0.247809	8.02723e-06	3.95003e-05
1636643_at	10.1999	10.2787	10.5554	10.5992	10.6227	0.000151704	0.248392	8.04638e-06	3.95003e-05
1633443_s_at	10.6393	10.7414	11.057	11.1839	11.1499	0.000151988	0.248993	8.06612e-06	3.95003e-05
1628580_a_at	9.53055	9.68604	9.94906	10.0071	10.0101	0.000152084	0.249749	8.09112e-06	3.95003e-05
1640577_a_at	9.44637	9.53837	9.87294	9.88647	9.94195	0.000152084	0.249867	8.09547e-06	3.95003e-05
1640974_a_at	9.4382	9.55029	10.0433	10.169	9.91812	0.000152084	0.249492	8.08256e-06	3.95003e-05
1638994_at	9.06318	9.11762	9.25908	9.2946	9.38169	0.000152249	0.250374	8.11268e-06	3.95003e-05
1624419_a_at	9.77152	9.89496	10.109	10.1557	10.116	0.000152574	0.252243	8.17537e-06	3.95003e-05
1624798_s_at	8.32358	8.3726	8.66838	8.76314	8.74824	0.000152574	0.252023	8.16746e-06	3.95003e-05
1626178_s_at	9.35853	9.45686	9.92849	9.95094	9.96344	0.000152574	0.252904	8.19811e-06	3.95003e-05
1633234_at	9.23439	9.23566	9.42834	9.44926	9.46661	0.000152574	0.252919	8.19887e-06	3.95003e-05
1633887_at	8.78557	8.72181	8.51441	8.46616	8.47043	0.000152574	0.251869	8.16221e-06	3.95003e-05
1639424_at	9.25239	9.53383	10.1514	9.71724	10.2699	0.000152574	0.25295	8.20016e-06	3.95003e-05
1624555_at	8.61408	8.66937	8.77941	8.80378	8.85596	0.000152592	0.253118	8.20585e-06	3.95003e-05
1626320_at	10.4713	10.5366	10.7609	10.7773	10.6493	0.000153091	0.254287	8.2443e-06	3.95003e-05
1633032_s_at	10.5442	10.5833	10.9146	11.0291	11.0335	0.000153091	0.254628	8.25616e-06	3.95003e-05
1623364_at	11.4405	11.5985	11.8133	11.7285	11.7199	0.000153822	0.256804	8.3286e-06	3.97239e-05
1623513_at	8.79288	8.87333	9.00787	9.01932	9.01972	0.000155323	0.259864	8.42895e-06	4.00788e-05
1634459_at	8.57359	8.53425	8.32561	8.29414	8.27273	0.000155654	0.260974	8.46602e-06	4.01316e-05
1629469_s_at	10.9519	10.9867	11.1725	11.3227	11.3548	0.000156801	0.263454	8.54761e-06	4.0247e-05
1627472_at	11.3532	11.4496	11.6715	11.6948	11.6984	0.000157877	0.266123	8.63589e-06	4.0247e-05
1632481_at	10.7182	10.8206	11.0784	11.0938	11.1453	0.000157877	0.26627	8.64091e-06	4.0247e-05
1626945_at	9.56651	9.72295	9.89797	9.95228	9.88984	0.00015849	0.267563	8.68346e-06	4.0247e-05
1623571_a_at	9.87224	9.9788	10.2569	10.2842	10.2648	0.00015863	0.268083	8.70088e-06	4.0247e-05
1629233_s_at	9.70919	9.79627	10.0003	10.0108	10.0214	0.000158639	0.268239	8.70623e-06	4.0247e-05
1638839_at	9.27914	9.34005	9.58905	9.62296	9.63698	0.000158683	0.26857	8.71727e-06	4.0247e-05
1627261_s_at	10.5906	10.597	10.8999	10.9407	10.9376	0.000158928	0.269442	8.74643e-06	4.0247e-05
1632171_a_at	8.61114	8.6227	8.80182	8.82119	8.77305	0.000158928	0.269391	8.74447e-06	4.0247e-05
1627212_at	10.7454	10.8813	11.0342	11.0895	11.0702	0.000159303	0.27022	8.77223e-06	4.0247e-05
1640070_a_at	12.1213	12.1764	12.4329	12.4559	12.4315	0.000159303	0.270354	8.77686e-06	4.0247e-05
1639025_at	8.40275	8.44729	8.93166	9.02917	9.11905	0.000160209	0.272746	8.85625e-06	4.0402e-05
1637684_at	11.4356	11.4958	11.902	11.9785	12.004	0.000161544	0.275991	8.96336e-06	4.0402e-05
1634858_s_at	9.33581	9.40361	9.8821	9.71139	9.92339	0.00016194	0.276875	8.99266e-06	4.0402e-05
1641168_s_at	10.0235	10.1197	10.3881	10.4447	10.4479	0.000162136	0.277756	9.02245e-06	4.0402e-05
1629263_at	8.15023	8.18113	8.04174	8.00625	8.03278	0.000162526	0.27857	9.04917e-06	4.0402e-05
1629048_s_at	11.0508	11.1679	11.4379	11.459	11.5627	0.000162913	0.279547	9.08149e-06	4.0402e-05
1630165_s_at	9.41926	9.43066	9.85902	9.91292	9.9259	0.000162913	0.279667	9.08569e-06	4.0402e-05
1639758_at	9.21281	9.31959	9.57213	9.62147	9.56194	0.000163679	0.281366	9.14149e-06	4.0402e-05
1626980_at	9.5884	9.68519	10.0726	10.1604	10.2045	0.000164133	0.282781	9.18866e-06	4.0402e-05
1638560_a_at	9.58298	9.60841	9.99761	9.99553	10.0205	0.000164133	0.282782	9.18901e-06	4.0402e-05
1637294_at	10.8494	10.9521	11.1814	11.251	11.2631	0.000164185	0.283018	9.19697e-06	4.0402e-05
1624023_at	11.1004	11.1658	11.4202	11.4508	11.4394	0.000164765	0.284367	9.24139e-06	4.0402e-05
1627964_s_at	9.73078	9.8216	10.0502	10.0601	10.0971	0.000165137	0.285409	9.27617e-06	4.0402e-05
1634362_a_at	9.74946	9.79268	10.0365	10.0658	10.0856	0.000165137	0.285293	9.2721e-06	4.0402e-05
1640906_at	10.8398	11.0614	11.3719	11.2909	11.2949	0.000165546	0.286393	9.30875e-06	4.0402e-05
1627711_at	12.2095	12.3336	12.5347	12.5348	12.5622	0.000166457	0.288559	9.38038e-06	4.0402e-05
1633498_at	7.86812	7.86823	7.99505	8.06002	8.12034	0.000166747	0.289949	9.42738e-06	4.0402e-05
1638499_s_at	8.73192	8.78249	8.99549	9.01037	9.03547	0.000166747	0.289859	9.42417e-06	4.0402e-05
1632554_at	8.61977	8.68282	8.88843	8.94449	8.92818	0.000167036	0.290601	9.4489e-06	4.0402e-05
1630623_a_at	10.0035	10.0762	10.4078	10.4542	10.4302	0.000167524	0.292232	9.50347e-06	4.0402e-05
1637380_s_at	11.5399	11.6666	11.9936	12.0277	12.0581	0.000167524	0.292192	9.50186e-06	4.0402e-05
1641461_at	9.49917	9.55963	9.74948	9.78934	9.77526	0.000167524	0.291779	9.48784e-06	4.0402e-05
1634528_at	9.56443	9.72678	9.86739	9.89999	9.87993	0.000167743	0.293297	9.53935e-06	4.0402e-05
1635165_a_at	9.74183	9.76111	10.0954	10.0618	10.0485	0.000167862	0.294566	9.58311e-06	4.0402e-05
1626924_a_at	13.2515	13.2905	13.352	13.3855	13.37	0.000168461	0.296908	9.66087e-06	4.0402e-05
1626967_at	9.75464	9.88309	10.2149	10.2516	10.294	0.000168461	0.297681	9.68857e-06	4.0402e-05
1631342_at	11.0184	11.163	11.4017	11.376	11.3813	0.000168461	0.297706	9.6897e-06	4.0402e-05
1634315_a_at	8.94857	8.97846	9.13615	9.16994	9.1634	0.000168461	0.297371	9.67782e-06	4.0402e-05
1624742_a_at	11.0871	11.2705	11.5263	11.4927	11.5055	0.000169057	0.299823	9.76022e-06	4.0402e-05
1633268_s_at	8.77688	8.79627	8.63285	8.63881	9.02034	0.000169057	0.299399	9.74606e-06	4.0402e-05
1641083_at	10.0445	10.1112	10.457	10.5494	10.5433	0.000169057	0.299823	9.76029e-06	4.0402e-05
1624230_s_at	12.0901	12.2193	12.3329	12.4732	12.4351	0.000169197	0.30021	9.77374e-06	4.0402e-05
1624755_a_at	11.8552	11.9703	12.1807	12.2303	12.2395	0.000169197	0.300359	9.77889e-06	4.0402e-05
1630859_s_at	8.54118	8.64133	8.9783	9.02602	9.10339	0.000169197	0.300653	9.78913e-06	4.0402e-05
1631524_a_at	8.76869	8.90714	9.22344	9.29397	9.36635	0.000169197	0.300571	9.78613e-06	4.0402e-05
1623234_s_at	9.76247	9.86228	10.2569	10.3131	10.2919	0.000169407	0.301254	9.80901e-06	4.0402e-05
1625295_at	8.58833	8.66401	8.91647	8.99277	9.01256	0.000169407	0.301625	9.82204e-06	4.0402e-05
1623923_a_at	8.82325	8.9729	9.33253	9.37669	9.46302	0.000169452	0.301856	9.82989e-06	4.0402e-05
1623966_s_at	8.42474	8.50446	8.92016	9.00495	9.11299	0.00016969	0.302544	9.85262e-06	4.0402e-05
1637867_at	8.11006	8.11605	8.34579	8.38634	8.43022	0.00016969	0.302651	9.85643e-06	4.0402e-05
1625748_s_at	10.6651	10.76	11.0037	11.01	10.9382	0.000169984	0.304304	9.91284e-06	4.05257e-05
1627546_at	8.87322	8.93995	9.15377	9.17853	9.21742	0.000170548	0.305767	9.96145e-06	4.06069e-05
1626763_a_at	9.79106	9.89712	10.2031	10.1927	10.2019	0.000170733	0.306477	9.98524e-06	4.06069e-05
1641104_s_at	10.9275	11.0012	11.3395	11.3559	11.4002	0.00017293	0.310953	1.01324e-05	4.07607e-05
1635907_at	11.1326	11.2234	11.455	11.4775	11.4847	0.000172947	0.311137	1.01387e-05	4.07607e-05
1623408_s_at	9.58682	9.72895	10.0386	10.1035	10.1522	0.000173484	0.312409	1.01808e-05	4.07607e-05
1625131_s_at	11.9009	11.9775	12.2536	12.276	12.3494	0.00017389	0.313293	1.021e-05	4.07607e-05
1639469_a_at	10.9889	11.0614	11.4099	11.4442	11.5499	0.000174031	0.313702	1.02236e-05	4.07607e-05
1635442_a_at	9.5358	9.81438	10.217	10.1381	10.1228	0.000174581	0.315001	1.02667e-05	4.07607e-05
1638634_at	8.9731	9.1662	9.29483	9.29313	9.29368	0.000175147	0.316331	1.03107e-05	4.07607e-05
1632285_at	11.3013	11.3567	11.5914	11.6407	11.6294	0.00017523	0.316791	1.03263e-05	4.07607e-05
1624931_at	9.24001	9.43309	9.67957	9.81647	9.81513	0.00017529	0.318551	1.03861e-05	4.07607e-05
1627786_s_at	9.03794	9.10931	9.57111	9.65653	9.6602	0.00017529	0.317708	1.03569e-05	4.07607e-05
1633363_at	8.91025	9.02227	9.20619	9.2261	9.2224	0.00017529	0.31881	1.03959e-05	4.07607e-05
1635817_at	8.52988	8.49372	8.30185	8.23437	8.20297	0.00017529	0.317956	1.03653e-05	4.07607e-05
1637109_s_at	10.8034	10.9466	11.3851	11.3008	11.4341	0.00017529	0.31881	1.03961e-05	4.07607e-05
1640799_at	8.23729	8.34331	8.57613	8.68438	8.79893	0.00017529	0.318909	1.03998e-05	4.07607e-05
1635725_a_at	10.6803	10.7751	11.1234	11.1931	11.2539	0.00017535	0.31948	1.04194e-05	4.07607e-05
1631115_at	8.75543	8.84477	8.96942	8.92885	8.91482	0.0001756	0.320246	1.04451e-05	4.07607e-05
1625290_at	10.8599	10.9827	11.2967	11.3183	11.334	0.000176527	0.322689	1.05261e-05	4.08236e-05
1641541_a_at	11.5355	11.6471	11.8953	11.9034	11.8767	0.000177274	0.324391	1.05827e-05	4.08236e-05
1632443_at	8.19551	8.1867	8.40552	8.45021	8.50276	0.000177656	0.32556	1.06219e-05	4.08236e-05
1631099_at	8.77655	8.85965	9.16236	9.16546	9.00779	0.000178135	0.326909	1.06669e-05	4.08236e-05
1636513_a_at	10.1962	10.3039	10.5828	10.7113	10.6969	0.00017826	0.327602	1.06902e-05	4.08236e-05
1625358_s_at	9.75401	9.76393	9.97704	9.97741	9.94173	0.00017829	0.328248	1.07127e-05	4.08236e-05
1631526_s_at	9.44536	9.47823	9.80313	9.94009	9.901	0.00017829	0.328292	1.07145e-05	4.08236e-05
1641620_s_at	9.3385	9.38944	9.60516	9.67905	9.64466	0.00017829	0.32824	1.07121e-05	4.08236e-05
1631772_a_at	8.47615	8.50907	8.88448	8.94317	8.96001	0.000178917	0.330076	1.07741e-05	4.08236e-05
1625578_at	8.38323	8.39744	8.60712	8.75935	8.66832	0.000179246	0.331035	1.08061e-05	4.08236e-05
1636727_at	8.44033	8.44081	8.75809	8.81457	8.82469	0.000179246	0.331155	1.08104e-05	4.08236e-05
1633767_at	9.91733	9.98444	10.2817	10.3238	10.3341	0.000179423	0.331647	1.08268e-05	4.08236e-05
1641321_a_at	9.60222	9.7174	10.1745	10.2245	10.2956	0.000179423	0.331797	1.08321e-05	4.08236e-05
1634865_at	8.1071	8.17823	8.33552	8.32488	8.30495	0.000179495	0.332089	1.0842e-05	4.08236e-05
1634402_at	9.53647	9.67989	9.80071	9.8262	9.78711	0.000180612	0.335108	1.09427e-05	4.08236e-05
1633935_at	9.82128	9.86172	10.2412	10.3148	10.3221	0.000180629	0.33533	1.09503e-05	4.08236e-05
1623670_at	9.05837	9.07096	9.21418	9.30026	9.2537	0.000180826	0.33614	1.09774e-05	4.08236e-05
1629084_at	9.6333	9.66422	9.87018	9.89166	9.87113	0.000180847	0.336544	1.09917e-05	4.08236e-05
1629667_at	9.25666	9.34606	9.50439	9.58806	9.4767	0.000180847	0.336656	1.09957e-05	4.08236e-05
1631527_at	11.6563	11.7368	12.0171	12.0445	12.0725	0.000181169	0.337573	1.10264e-05	4.08236e-05
1622942_at	8.54994	8.58546	8.37438	8.34541	8.30178	0.00018127	0.337922	1.10381e-05	4.08236e-05
1634561_s_at	9.57962	9.60073	9.95702	9.9819	9.91134	0.00018135	0.338701	1.10643e-05	4.08236e-05
1640528_at	8.92823	8.97786	9.34897	9.39046	9.51061	0.00018135	0.338817	1.10688e-05	4.08236e-05
1632274_at	9.03236	9.12836	9.3596	9.3822	9.36733	0.000182215	0.340804	1.11348e-05	4.09692e-05
1624594_at	9.06159	9.12074	9.32472	9.35258	9.38216	0.000182819	0.343215	1.12165e-05	4.1105e-05
1635236_at	8.60025	8.60863	8.8701	8.87724	8.83308	0.00018309	0.34449	1.1259e-05	4.1105e-05
1638685_at	11.6181	11.6534	12.0034	11.984	12.0526	0.00018309	0.344882	1.12734e-05	4.1105e-05
1641053_s_at	9.62768	9.75015	10.0549	10.0861	10.0536	0.00018309	0.34501	1.12781e-05	4.1105e-05
1625962_at	9.72172	9.74507	9.91804	9.97519	9.94273	0.000183923	0.347386	1.13577e-05	4.12512e-05
1635009_at	9.45642	9.57529	9.92234	9.99672	10.0685	0.000184057	0.3478	1.13716e-05	4.12512e-05
1626174_a_at	9.91037	10.0668	10.3808	10.5134	10.5574	0.00018491	0.349736	1.14356e-05	4.1361e-05
1639690_a_at	8.63326	8.72315	9.17039	9.24592	9.29523	0.000184955	0.350307	1.14554e-05	4.1361e-05
1622907_at	9.62454	9.7584	9.81708	9.81347	9.78881	0.000185562	0.352433	1.15272e-05	4.14889e-05
1632119_s_at	11.4456	11.6025	11.7748	11.7641	11.8358	0.000185904	0.353244	1.15541e-05	4.14889e-05
1632922_at	7.82245	7.80852	8.00443	8.11296	8.14799	0.000186245	0.354557	1.15982e-05	4.14889e-05
1641420_s_at	8.9178	8.98386	9.25287	9.35959	9.33459	0.000186245	0.354557	1.15982e-05	4.14889e-05
1635416_at	8.7069	8.66953	8.94143	8.86882	8.95759	0.000187133	0.357053	1.16822e-05	4.15834e-05
1625332_at	8.9268	9.05681	9.23348	9.29261	9.36482	0.000187646	0.358198	1.172e-05	4.15834e-05
1624284_a_at	9.50864	9.53419	9.78492	9.83144	9.80615	0.000187971	0.359028	1.17475e-05	4.15834e-05
1639783_s_at	9.39821	9.46986	9.77516	9.87837	9.88074	0.000187971	0.359147	1.17518e-05	4.15834e-05
1629396_a_at	8.7025	8.76708	9.08347	9.11784	9.10346	0.000188505	0.360497	1.17967e-05	4.15834e-05
1629867_a_at	13.5122	13.4908	13.57	13.5919	13.5956	0.000188877	0.361703	1.18374e-05	4.15834e-05
1625549_at	8.65045	8.69367	8.77705	8.80928	8.79214	0.000189005	0.362115	1.18512e-05	4.15834e-05
1630437_s_at	9.97986	10.1168	10.421	10.4345	10.3902	0.000189048	0.362362	1.18597e-05	4.15834e-05
1629776_a_at	10.0167	10.122	10.3149	10.3712	10.3517	0.000189068	0.362566	1.18668e-05	4.15834e-05
1636575_s_at	10.4382	10.5511	10.838	10.8692	10.7946	0.000190015	0.364714	1.19379e-05	4.17379e-05
1635340_at	9.78283	9.79233	10.0935	10.1683	10.1224	0.000191228	0.367877	1.20434e-05	4.18507e-05
1628691_at	10.6365	10.773	11.0898	11.1513	11.2102	0.000191671	0.368897	1.20772e-05	4.18507e-05
1640980_at	8.90591	8.93974	9.08324	9.1407	9.10184	0.000191772	0.36926	1.20895e-05	4.18507e-05
1627308_s_at	13.632	13.6341	13.7269	13.7228	13.729	0.000191938	0.369935	1.2112e-05	4.18507e-05
1637133_x_at	9.79197	9.61019	9.22374	9.1447	9.11247	0.000191938	0.370334	1.21258e-05	4.18507e-05
1637773_s_at	10.3015	10.32	10.7092	10.8523	10.873	0.000192092	0.370883	1.2145e-05	4.18507e-05
1635587_s_at	9.09109	9.09712	9.25826	9.29307	9.28602	0.000192379	0.371706	1.21723e-05	4.18507e-05
1639048_a_at	9.9288	9.98426	10.255	10.2686	10.1662	0.000192379	0.372278	1.21926e-05	4.18507e-05
1634702_at	8.4497	8.49857	8.80771	8.72391	8.53878	0.000192575	0.373162	1.22228e-05	4.18507e-05
1625758_s_at	8.64738	8.66222	8.93849	8.94916	8.99169	0.000192969	0.374599	1.22715e-05	4.18507e-05
1638120_at	10.735	10.8448	11.1051	11.1091	11.0143	0.000192969	0.374415	1.22646e-05	4.18507e-05
1623753_at	9.109	9.249	9.6038	9.61222	9.5605	0.000194133	0.377875	1.23812e-05	4.18507e-05
1628679_at	8.57204	8.55472	8.70932	8.72272	8.70203	0.000194349	0.379144	1.24248e-05	4.18507e-05
1630457_s_at	9.27736	9.36173	9.78818	9.80448	9.85815	0.000194349	0.379052	1.2421e-05	4.18507e-05
1632103_at	11.4027	11.4777	11.7523	11.7791	11.6791	0.000194349	0.379144	1.24244e-05	4.18507e-05
1624564_s_at	12.7672	12.8097	13.0195	13.0274	13.0545	0.000194371	0.379355	1.24322e-05	4.18507e-05
1626663_s_at	10.4239	10.4607	10.8654	10.9284	10.983	0.000195104	0.382344	1.25334e-05	4.18507e-05
1627729_s_at	9.98159	9.9681	10.2531	10.3033	10.352	0.000195104	0.381314	1.24976e-05	4.18507e-05
1629227_at	8.30982	8.34504	8.79782	8.85708	8.90816	0.000195104	0.382486	1.25389e-05	4.18507e-05
1635757_at	9.83991	9.94419	10.1992	10.1907	10.2772	0.000195104	0.382375	1.25348e-05	4.18507e-05
1640364_at	11.0827	11.0941	11.4621	11.5346	11.7112	0.000195104	0.382034	1.25228e-05	4.18507e-05
1627933_a_at	8.23772	8.31401	8.52446	8.63191	8.6158	0.000195548	0.383699	1.25795e-05	4.18592e-05
1635338_a_at	12.0744	12.1736	12.4593	12.5307	12.3192	0.000198318	0.389784	1.27802e-05	4.18592e-05
1623889_at	10.0467	10.0816	10.399	10.4775	10.4676	0.000199115	0.392192	1.28613e-05	4.18592e-05
1630174_s_at	9.24663	9.16799	8.93313	8.88434	8.88899	0.000199115	0.392257	1.28638e-05	4.18592e-05
1637556_at	10.3765	10.4868	10.8157	10.8965	10.876	0.000199324	0.39319	1.28957e-05	4.18592e-05
1636344_at	12.3678	12.4305	12.6564	12.6899	12.6397	0.000199336	0.393388	1.29026e-05	4.18592e-05
1635422_s_at	8.59132	8.70686	8.92705	8.95252	8.81486	0.000199548	0.39398	1.29224e-05	4.18592e-05
1633778_at	9.12055	9.22756	9.4568	9.58883	9.42134	0.000199602	0.39426	1.29321e-05	4.18592e-05
1630728_a_at	8.87357	8.93283	9.15879	9.16826	9.18882	0.000199759	0.394744	1.29484e-05	4.18592e-05
1634364_s_at	9.81259	9.81291	10.2889	10.3586	10.3391	0.000199876	0.395148	1.29621e-05	4.18592e-05
1634507_s_at	11.904	12.0181	12.2674	12.2126	12.1918	0.000200235	0.396595	1.30112e-05	4.18592e-05
1641289_at	10.7203	10.8663	11.1535	11.2648	11.2563	0.000200235	0.396731	1.30161e-05	4.18592e-05
1625970_at	8.33666	8.37409	8.55331	8.64174	8.72523	0.000200241	0.396964	1.30242e-05	4.18592e-05
1631114_a_at	9.14141	9.24932	9.53908	9.59492	9.60091	0.000200613	0.398002	1.30591e-05	4.18592e-05
1627566_a_at	11.7261	11.8262	12.0739	12.1472	12.1186	0.000200933	0.398874	1.30881e-05	4.18592e-05
1633144_at	9.81803	9.87647	10.1837	10.2308	10.2853	0.000200975	0.399245	1.31012e-05	4.18592e-05
1623254_s_at	8.72079	8.78374	9.19185	9.21984	9.30993	0.000201128	0.400504	1.31438e-05	4.18592e-05
1640260_at	8.49433	8.57056	8.9172	8.92367	8.91376	0.000201135	0.400973	1.31609e-05	4.18592e-05
1632796_s_at	8.21003	8.3248	8.58657	8.69126	8.71331	0.000201329	0.401523	1.31798e-05	4.18592e-05
1640247_at	10.268	10.3566	10.5952	10.5917	10.5663	0.00020133	0.4017	1.3186e-05	4.18592e-05
1631327_at	9.03974	9.09724	9.32545	9.38493	9.35137	0.000201563	0.402516	1.32137e-05	4.18592e-05
1631296_at	12.9339	12.9894	13.0765	13.0882	13.0825	0.000202174	0.403912	1.326e-05	4.18592e-05
1624660_at	8.37215	8.38499	8.6477	8.68594	8.68193	0.000202394	0.404702	1.32868e-05	4.18592e-05
1637384_a_at	8.74734	8.83517	9.18344	9.28697	9.3063	0.0002024	0.405192	1.33037e-05	4.18592e-05
1641031_s_at	9.45416	9.48101	9.73089	9.76707	9.7424	0.0002024	0.405242	1.33058e-05	4.18592e-05
1629290_at	8.62193	8.65258	9.02196	9.06449	9.14196	0.000202709	0.406037	1.33323e-05	4.18592e-05
1624150_at	9.73617	9.89658	10.1257	10.1526	10.1318	0.000203165	0.408268	1.34087e-05	4.18592e-05
1629657_at	8.29085	8.26641	8.13791	8.12512	8.0715	0.000203165	0.407637	1.33862e-05	4.18592e-05
1630896_at	8.7064	8.66639	8.36077	8.27189	8.32263	0.000203165	0.408362	1.34122e-05	4.18592e-05
1635370_at	9.92189	10.0017	10.2816	10.2513	10.2262	0.000203165	0.407878	1.33946e-05	4.18592e-05
1637280_at	9.74752	9.78174	10.076	10.1219	10.1886	0.000203165	0.40736	1.33767e-05	4.18592e-05
1631636_at	8.5621	8.53382	8.84684	8.81391	8.80638	0.000203173	0.408554	1.3419e-05	4.18592e-05
1633506_s_at	8.63865	8.6182	8.83033	8.85803	8.83841	0.000203458	0.409898	1.34649e-05	4.18592e-05
1641475_at	11.0685	11.2471	11.4806	11.5983	11.5593	0.000203458	0.410009	1.3469e-05	4.18592e-05
1633353_s_at	10.4068	10.4363	10.8046	10.8461	10.9585	0.000204065	0.411764	1.3528e-05	4.18592e-05
1624407_s_at	10.4421	10.5006	10.702	10.7432	10.6988	0.000204768	0.413715	1.35934e-05	4.18592e-05
1624604_a_at	8.79177	8.80698	8.81071	8.81172	8.57755	0.000204768	0.413584	1.35887e-05	4.18592e-05
1625068_a_at	10.0713	10.1751	10.4697	10.4953	10.5109	0.000204979	0.414319	1.36137e-05	4.18592e-05
1635517_at	8.33553	8.4341	8.67192	8.64611	8.65076	0.000204979	0.414779	1.36297e-05	4.18592e-05
1641410_at	8.97277	8.85989	8.43004	8.35393	8.35472	0.000205141	0.415536	1.36559e-05	4.18592e-05
1625475_s_at	9.58665	9.69989	9.91262	9.94133	9.98417	0.000205235	0.416124	1.36757e-05	4.18592e-05
1628782_at	8.9669	9.04705	9.34905	9.4652	9.47451	0.000205235	0.416215	1.36791e-05	4.18592e-05
1637863_x_at	8.28553	8.23858	8.00514	7.9694	8.00999	0.000206936	0.420965	1.38389e-05	4.19426e-05
1625172_s_at	9.91382	9.91963	10.3231	10.3855	10.3602	0.000206968	0.42121	1.38474e-05	4.19426e-05
1623901_s_at	11.4708	11.5679	11.7809	11.7896	11.7056	0.000207074	0.422755	1.39009e-05	4.19426e-05
1626901_at	8.8941	8.96225	9.28383	9.30304	9.3449	0.000207074	0.422657	1.38973e-05	4.19426e-05
1630772_at	8.03895	8.07793	8.32509	8.34549	8.41132	0.000207074	0.422985	1.3909e-05	4.19426e-05
1639599_at	9.08085	9.06333	9.41731	9.46043	9.47951	0.000207074	0.42205	1.38755e-05	4.19426e-05
1641708_at	8.92753	8.94831	9.14214	9.14426	9.1385	0.000207074	0.422143	1.3879e-05	4.19426e-05
1626217_at	11.2096	11.3146	11.6177	11.6396	11.5519	0.000207631	0.424537	1.39618e-05	4.19426e-05
1626382_s_at	10.5608	10.6284	10.8655	10.8792	10.8404	0.000207745	0.42513	1.39822e-05	4.19426e-05
1632360_s_at	8.51356	8.53564	8.68395	8.73577	8.62668	0.000208016	0.426043	1.40132e-05	4.19426e-05
1629779_at	9.74223	9.81719	10.1054	10.1499	10.1533	0.000208573	0.427908	1.40764e-05	4.19426e-05
1628956_at	8.04715	8.041	8.33735	8.45342	8.46787	0.000208752	0.428455	1.40948e-05	4.19426e-05
1632465_s_at	11.4774	11.5083	11.8836	11.9754	11.9845	0.000209014	0.429535	1.41318e-05	4.19426e-05
1639862_at	11.203	11.2564	11.5439	11.5862	11.5928	0.000209014	0.429428	1.41273e-05	4.19426e-05
1638498_s_at	11.0457	11.0986	11.4578	11.4726	11.4289	0.000209045	0.429779	1.41403e-05	4.19426e-05
1633727_s_at	9.78509	9.8682	10.155	10.185	10.2005	0.000209308	0.430501	1.41645e-05	4.19426e-05
1636867_s_at	9.14751	9.22038	9.50599	9.47489	9.52078	0.000209308	0.430681	1.41709e-05	4.19426e-05
1636808_at	8.74648	8.654	8.39977	8.37349	8.35826	0.000209379	0.43137	1.41949e-05	4.19426e-05
1638299_at	8.95137	8.99095	9.28874	9.4654	9.38943	0.000210084	0.433191	1.42553e-05	4.20148e-05
1630650_at	8.86617	8.87782	9.30752	9.35443	9.37115	0.000210161	0.433708	1.42737e-05	4.20148e-05
1632904_at	8.24625	8.34656	8.72829	8.78809	8.78501	0.000211416	0.43703	1.4385e-05	4.209e-05
1633760_at	8.4939	8.57116	8.69105	8.71854	8.59414	0.000211719	0.439383	1.44658e-05	4.209e-05
1634935_a_at	11.2344	11.2922	11.752	11.5726	11.5259	0.000211719	0.438077	1.44204e-05	4.209e-05
1639346_at	10.1956	10.2646	10.5553	10.5645	10.5601	0.000211719	0.438773	1.44443e-05	4.209e-05
1640130_at	10.1981	10.255	10.535	10.6615	10.6292	0.000211719	0.439491	1.44703e-05	4.209e-05
1640656_a_at	10.1966	10.2238	10.5121	10.5394	10.5953	0.000211719	0.43943	1.44678e-05	4.209e-05
1636941_at	9.04277	9.11054	9.53588	9.61332	9.7215	0.000212134	0.441208	1.45278e-05	4.209e-05
1637946_at	8.87141	8.92402	9.11365	9.13919	9.1302	0.000212134	0.441241	1.45298e-05	4.209e-05
1640075_a_at	11.0938	11.1157	11.5124	11.5148	11.582	0.000212134	0.441626	1.45444e-05	4.209e-05
1626061_at	8.03107	8.08907	8.38934	8.4349	8.49616	0.000213077	0.444633	1.46458e-05	4.22253e-05
1631237_s_at	9.8485	9.93099	10.107	10.1363	10.1558	0.000213077	0.444531	1.4642e-05	4.22253e-05
1629859_s_at	9.35418	9.42838	9.74474	9.77915	9.76724	0.00021413	0.44763	1.4747e-05	4.22969e-05
1630041_at	8.03803	7.99315	7.79488	7.71915	7.72375	0.000214851	0.449803	1.482e-05	4.22969e-05
1641464_s_at	9.94682	9.98177	10.577	9.90942	9.87226	0.000214851	0.449878	1.4823e-05	4.22969e-05
1628771_s_at	8.83111	8.90775	9.11288	9.17811	9.1474	0.000214886	0.450137	1.4832e-05	4.22969e-05
1639431_at	11.1807	11.3568	11.6356	11.648	11.6342	0.000214914	0.45038	1.48405e-05	4.22969e-05
1628486_a_at	9.78298	9.86288	10.1053	10.157	10.1265	0.000215197	0.451159	1.48667e-05	4.22969e-05
1627498_at	10.1493	10.195	10.5419	10.5607	10.5309	0.000215466	0.452466	1.49117e-05	4.22969e-05
1636634_a_at	10.1032	10.1218	10.4483	10.5365	10.5587	0.000215482	0.453061	1.49323e-05	4.22969e-05
1639162_at	10.1659	10.2858	10.5674	10.5392	10.5802	0.000215536	0.453573	1.49506e-05	4.22969e-05
1623998_at	9.38983	9.43545	9.81512	9.80034	9.80394	0.000215865	0.455907	1.5032e-05	4.22969e-05
1635378_at	9.24576	9.28595	9.5913	9.64287	9.61553	0.000215865	0.455818	1.50281e-05	4.22969e-05
1635954_at	9.10416	9.18254	9.43444	9.4897	9.45889	0.000215865	0.455842	1.50294e-05	4.22969e-05
1629786_a_at	9.90833	9.96639	10.2867	10.2833	10.2656	0.000215915	0.456197	1.50421e-05	4.22969e-05
1640324_at	10.8399	10.9008	11.1682	11.1822	11.1632	0.000215967	0.45668	1.5059e-05	4.22969e-05
1626170_at	10.7116	10.8444	11.0085	11.0602	11.1398	0.00021599	0.457307	1.50812e-05	4.22969e-05
1625095_at	10.8094	10.8595	11.1497	11.1613	11.1399	0.000216561	0.459054	1.51403e-05	4.2332e-05
1624215_s_at	10.8288	10.8725	11.2184	11.2815	11.2711	0.000216583	0.459286	1.51485e-05	4.2332e-05
1624899_at	10.3687	10.4469	10.7811	10.8137	10.873	0.000217197	0.461335	1.5218e-05	4.23809e-05
1628942_at	8.35778	8.45102	8.75897	8.87817	8.90073	0.000217416	0.462548	1.52601e-05	4.23809e-05
1640767_s_at	10.7056	10.857	11.1044	11.1026	11.0775	0.000217416	0.462519	1.52586e-05	4.23809e-05
1635854_s_at	8.91286	9.00824	9.38439	9.47968	9.52906	0.000217647	0.463601	1.52963e-05	4.23809e-05
1638086_at	8.78955	8.85144	9.09219	9.02628	8.86046	0.000217748	0.464191	1.53168e-05	4.23809e-05
1624481_a_at	9.76394	9.85908	10.2368	10.381	10.3936	0.000217873	0.464643	1.53322e-05	4.23809e-05
1627321_x_at	8.68212	8.54025	8.49998	8.47346	8.41879	0.000218306	0.466209	1.53854e-05	4.23809e-05
1636141_s_at	8.89467	9.00569	9.37879	9.44027	9.45753	0.000218306	0.466073	1.53804e-05	4.23809e-05
1638130_at	9.65233	9.68507	9.90871	9.90379	9.91678	0.000218891	0.46847	1.54626e-05	4.2399e-05
1632931_at	8.70304	8.74977	9.11876	9.20348	9.19334	0.000219194	0.469531	1.54992e-05	4.2399e-05
1632577_a_at	9.78682	9.91388	10.2032	10.1825	10.1972	0.000219589	0.470567	1.55338e-05	4.2399e-05
1636708_at	10.8003	10.8773	11.1523	11.2284	11.2178	0.000219659	0.471277	1.55583e-05	4.2399e-05
1626787_s_at	10.2212	10.3063	10.5181	10.5189	10.4578	0.000219834	0.471847	1.55782e-05	4.2399e-05
1631724_s_at	9.5237	9.5974	9.78189	9.8134	9.78538	0.000219968	0.472323	1.55944e-05	4.2399e-05
1627736_at	9.33891	9.46181	9.76691	9.86227	9.8818	0.00022031	0.473289	1.56268e-05	4.2399e-05
1628558_at	9.1844	9.22745	9.41117	9.38987	9.38967	0.00022031	0.473625	1.56389e-05	4.2399e-05
1628572_s_at	10.1625	10.2067	10.4738	10.5448	10.4306	0.00022031	0.473437	1.56322e-05	4.2399e-05
1629792_at	10.7089	10.8091	11.1785	11.2213	11.2765	0.000220649	0.474543	1.56698e-05	4.24084e-05
1634527_s_at	8.71802	8.79104	9.1605	9.21269	9.16723	0.000221411	0.47675	1.57442e-05	4.25353e-05
1635040_a_at	9.65487	9.75593	10.1096	10.1226	10.1769	0.000223265	0.482658	1.59446e-05	4.29688e-05
1633528_s_at	10.0407	10.0829	10.4089	10.4314	10.4722	0.000223577	0.483896	1.59865e-05	4.29688e-05
1634836_a_at	8.95664	8.98987	9.47564	9.53948	9.50354	0.000223577	0.483929	1.59881e-05	4.29688e-05
1635502_at	9.21844	9.27951	9.54643	9.51558	9.48761	0.000224136	0.4855	1.60411e-05	4.30364e-05
1624732_at	8.73878	8.72075	8.53398	8.48627	8.52438	0.000224666	0.487419	1.61066e-05	4.30626e-05
1626392_s_at	11.8852	11.9141	12.1413	12.229	12.135	0.000224666	0.487226	1.60992e-05	4.30626e-05
1624006_at	8.55482	8.66227	8.86641	8.87724	8.8662	0.000225209	0.488984	1.61594e-05	4.31292e-05
1630086_at	8.71147	8.75237	8.93824	8.95247	8.92088	0.000225686	0.490407	1.62075e-05	4.3183e-05
1635479_a_at	9.46757	9.549	9.75846	9.80158	9.90428	0.000226393	0.492135	1.62651e-05	4.3186e-05
1636301_s_at	10.0548	10.0983	10.5355	10.6699	10.6605	0.000226902	0.493632	1.63157e-05	4.3186e-05
1624496_at	9.0699	9.09881	9.46973	9.57225	9.60818	0.000227053	0.494348	1.63405e-05	4.3186e-05
1623138_at	8.92701	8.98309	9.27758	9.37009	9.41055	0.000227107	0.494961	1.63618e-05	4.3186e-05
1638321_s_at	11.6205	11.7199	11.9938	11.9906	11.914	0.000227107	0.495438	1.63792e-05	4.3186e-05
1636788_a_at	10.229	10.3383	10.5905	10.6601	10.5982	0.000227317	0.496478	1.64152e-05	4.3186e-05
1634430_at	8.64957	8.72293	9.02849	9.08617	9.11989	0.000227407	0.497065	1.64357e-05	4.3186e-05
1631118_s_at	9.96871	10.0637	10.4143	10.4851	10.5518	0.000228554	0.500705	1.65588e-05	4.3186e-05
1633901_at	8.22924	8.19945	8.07483	8.07803	8.05462	0.000228554	0.500624	1.65556e-05	4.3186e-05
1640329_s_at	10.1171	10.1325	10.5818	10.6264	10.664	0.000228554	0.500744	1.65606e-05	4.3186e-05
1632222_a_at	10.6943	10.8153	11.2054	11.1877	11.2089	0.000228757	0.501581	1.65894e-05	4.3186e-05
1626350_at	9.07523	9.12122	9.30722	9.3258	9.28872	0.000228775	0.501816	1.65977e-05	4.3186e-05
1626537_at	9.03914	9.17197	9.41687	9.49657	9.50166	0.000229043	0.502795	1.66312e-05	4.3186e-05
1631069_a_at	8.70789	8.74017	8.854	8.86823	8.88117	0.000229272	0.503494	1.66549e-05	4.3186e-05
1641294_a_at	11.2625	11.3717	11.6042	11.5921	11.6055	0.00022933	0.504022	1.66732e-05	4.3186e-05
1641318_at	9.45675	9.56859	9.91216	9.71037	9.85127	0.00022933	0.504022	1.66729e-05	4.3186e-05
1637510_s_at	10.1414	10.2534	10.455	10.4893	10.4569	0.000229378	0.504316	1.66837e-05	4.3186e-05
1626749_a_at	11.3815	11.4202	11.8529	11.995	11.9578	0.000230066	0.506664	1.67636e-05	4.32091e-05
1635398_at	11.7847	11.9084	12.097	12.1382	12.1437	0.000230066	0.50681	1.6769e-05	4.32091e-05
1627509_s_at	10.7343	10.775	11.186	11.1398	11.1787	0.000230072	0.50702	1.67765e-05	4.32091e-05
1635291_a_at	9.22745	9.24744	9.56325	9.5925	9.58504	0.000230986	0.510022	1.68786e-05	4.33997e-05
1640470_s_at	9.52349	9.65054	9.9569	10.0278	10.0691	0.000231726	0.511853	1.69398e-05	4.34847e-05
1623375_at	8.35294	8.4407	8.58682	8.6296	8.59949	0.000232034	0.512883	1.69744e-05	4.35012e-05
1630376_at	9.18459	9.18116	9.57787	9.73389	9.86817	0.000232382	0.514832	1.70423e-05	4.35871e-05
1638505_at	11.5398	11.5938	11.9564	11.9941	12.0127	0.000232553	0.515664	1.70716e-05	4.35871e-05
1628920_at	10.0577	10.0942	10.2939	10.3234	10.3258	0.000232741	0.516279	1.70925e-05	4.35871e-05
1635630_a_at	9.88535	9.93228	10.3238	10.4077	10.4301	0.000233057	0.517775	1.71443e-05	4.35907e-05
1624504_s_at	10.3676	10.5175	10.7316	10.7666	10.7614	0.000233299	0.518579	1.71715e-05	4.35907e-05
1624826_at	9.94486	10.0156	10.2153	10.2777	10.2709	0.000233439	0.51942	1.72011e-05	4.35907e-05
1634881_at	9.04669	9.04136	9.45468	9.50695	9.55416	0.000233873	0.520785	1.72474e-05	4.35907e-05
1637360_at	8.65132	8.52165	8.37717	8.32732	8.33453	0.000233983	0.52123	1.72627e-05	4.35907e-05
1627506_at	8.33223	8.40805	8.72164	8.75133	8.79985	0.000234093	0.522209	1.72963e-05	4.35907e-05
1639320_a_at	10.1386	10.2191	10.5082	10.5504	10.5475	0.000234093	0.52226	1.72985e-05	4.35907e-05
1623584_at	9.82261	9.88328	10.2379	10.3181	10.3526	0.000234268	0.522862	1.73196e-05	4.35907e-05
1625683_at	9.76695	9.90188	10.0357	10.0219	10.0158	0.000234572	0.523942	1.73566e-05	4.36128e-05
1623471_s_at	8.58917	8.68813	9.17814	9.2852	9.31066	0.00023502	0.525625	1.7414e-05	4.36339e-05
1626405_at	8.50622	8.50834	8.835	8.87186	8.90623	0.000235048	0.526004	1.74278e-05	4.36339e-05
1638012_at	8.25405	8.32664	8.47078	8.48323	8.52404	0.000235149	0.526633	1.74497e-05	4.36339e-05
1623244_at	10.8926	10.9088	11.1864	11.2122	11.2751	0.000236039	0.52963	1.75519e-05	4.37687e-05
1623422_a_at	9.47524	9.55852	9.77827	9.79859	9.77443	0.000236117	0.53061	1.75867e-05	4.37687e-05
1624392_s_at	8.79096	8.83079	9.27043	9.2793	9.29257	0.000236969	0.533929	1.77003e-05	4.37687e-05
1628220_at	8.29131	8.30472	8.44656	8.51297	8.47355	0.000236969	0.533738	1.76928e-05	4.37687e-05
1633059_at	10.2678	10.3013	10.7204	10.7633	10.8382	0.000236969	0.533935	1.77011e-05	4.37687e-05
1626200_s_at	8.50519	8.55439	8.94694	9.04466	9.08224	0.000236972	0.534143	1.77085e-05	4.37687e-05
1632973_at	8.66294	8.73297	8.91003	8.96245	8.90707	0.000236973	0.534348	1.77159e-05	4.37687e-05
1641284_a_at	9.45003	9.5301	9.79697	9.87114	9.82569	0.000237055	0.534936	1.77366e-05	4.37687e-05
1626591_at	9.7269	9.84835	10.2202	10.2674	10.2789	0.000237251	0.535579	1.77585e-05	4.37687e-05
1626888_at	9.11883	9.17896	9.60182	9.63984	9.68806	0.000237847	0.537307	1.78164e-05	4.37929e-05
1628875_at	8.8885	8.89732	9.08895	9.10267	9.09135	0.000237847	0.537531	1.7825e-05	4.37929e-05
1638526_a_at	8.91286	8.96604	9.15208	9.16667	9.15715	0.000238361	0.539503	1.78928e-05	4.38809e-05
1628189_at	8.50476	8.55544	8.8718	8.95905	8.9325	0.000238689	0.540755	1.79355e-05	4.38809e-05
1628862_at	9.26065	9.38717	9.6393	9.64789	9.68697	0.000238689	0.541054	1.7946e-05	4.38809e-05
1626375_a_at	9.26242	9.31494	9.46801	9.50681	9.50186	0.000239376	0.544039	1.80498e-05	4.40248e-05
1625178_at	10.3299	10.4625	10.7194	10.7318	10.7752	0.000239801	0.545207	1.80892e-05	4.40248e-05
1625931_at	9.62471	9.72345	10.0245	10.0758	10.1324	0.000239901	0.545906	1.81136e-05	4.40248e-05
1628152_at	10.9899	11.0801	11.2822	11.2977	11.2595	0.000239901	0.546045	1.81188e-05	4.40248e-05
1635501_at	10.7575	10.8744	11.1556	11.2161	11.2142	0.00024028	0.547112	1.81548e-05	4.4043e-05
1637870_a_at	8.65661	8.79284	8.93652	8.9827	9.01124	0.000240695	0.548467	1.82009e-05	4.40604e-05
1625272_at	11.2367	11.3228	11.5734	11.6306	11.573	0.000240837	0.548994	1.8219e-05	4.40604e-05
1638664_s_at	12.5817	12.5948	12.8631	12.884	12.8884	0.000241271	0.550393	1.82667e-05	4.41e-05
1641196_at	8.64262	8.64951	8.93913	8.98562	8.96438	0.000241394	0.551414	1.83024e-05	4.41e-05
1639169_at	8.34574	8.32084	8.12095	8.05768	8.11751	0.00024182	0.553081	1.83601e-05	4.41e-05
1634709_at	8.65062	8.65674	8.89854	8.96762	8.95682	0.000242132	0.554001	1.83913e-05	4.41e-05
1637992_at	9.0098	9.0912	9.20696	9.2234	9.25039	0.000242473	0.556232	1.8469e-05	4.41e-05
1641137_at	8.17077	8.22169	8.61971	8.64209	8.78621	0.000242473	0.556171	1.84658e-05	4.41e-05
1625281_at	10.1567	10.2004	10.4547	10.4863	10.4422	0.000242481	0.556807	1.849e-05	4.41e-05
1628726_s_at	8.9179	8.93072	9.42561	9.50218	9.56339	0.000242481	0.556586	1.8482e-05	4.41e-05
1640952_at	9.39646	9.44241	9.51272	9.51734	9.52248	0.000242481	0.556854	1.84922e-05	4.41e-05
1640142_at	10.4315	10.5594	10.8238	10.7731	10.7397	0.000243104	0.559143	1.85706e-05	4.42187e-05
1635947_at	12.741	12.8332	12.9534	12.9363	12.9168	0.000243382	0.560368	1.86132e-05	4.4238e-05
1632322_at	10.9083	11.033	11.312	11.3634	11.3532	0.000244497	0.563601	1.87224e-05	4.4238e-05
1633012_at	11.8738	11.9354	12.2741	12.3006	12.3235	0.000244497	0.563896	1.87328e-05	4.4238e-05
1635826_s_at	8.35734	8.39835	8.78638	8.85759	8.93207	0.000244497	0.56397	1.87359e-05	4.4238e-05
1629844_s_at	8.97569	9.12439	9.44437	9.49245	9.55764	0.000244913	0.565343	1.87828e-05	4.4238e-05
1630342_s_at	8.17188	8.2275	8.55946	8.57395	8.66081	0.000244913	0.565173	1.87765e-05	4.4238e-05
1637598_at	10.227	10.355	10.6248	10.6885	10.7146	0.000244941	0.565616	1.87925e-05	4.4238e-05
1639148_at	9.9263	10.0263	10.1849	10.2018	10.1665	0.000244961	0.566265	1.88153e-05	4.4238e-05
1627395_a_at	8.56596	8.57158	8.66155	8.68404	8.67436	0.000245278	0.568509	1.88942e-05	4.4238e-05
1627462_a_at	9.69447	9.72552	10.0024	10.034	9.98534	0.000245278	0.568826	1.8906e-05	4.4238e-05
1637164_at	12.8521	12.9229	13.0846	13.0748	13.0768	0.000245278	0.568467	1.88922e-05	4.4238e-05
1631884_at	8.36115	8.33157	8.22476	8.18201	8.12552	0.00024545	0.570115	1.8952e-05	4.4238e-05
1633390_at	9.43653	9.42128	9.7534	9.82053	9.84477	0.00024545	0.570051	1.8949e-05	4.4238e-05
1632220_s_at	13.5204	13.5392	13.6215	13.622	13.5957	0.000245877	0.571315	1.89925e-05	4.4238e-05
1623206_a_at	8.81986	8.91006	9.21886	9.26785	9.31333	0.000246079	0.571992	1.90157e-05	4.4238e-05
1624205_at	9.81468	9.89398	10.1992	10.2	10.1923	0.000246968	0.574613	1.91035e-05	4.4238e-05
1637017_at	9.70109	9.78866	10.069	10.1209	10.1172	0.000246968	0.574688	1.91066e-05	4.4238e-05
1640515_s_at	10.5744	10.6814	11.0749	11.169	11.1553	0.000246968	0.574688	1.91071e-05	4.4238e-05
1633284_at	9.1168	9.19296	9.33068	9.31146	9.29082	0.000247071	0.575133	1.91226e-05	4.4238e-05
1631690_a_at	8.87485	8.92648	9.06273	9.08332	9.04234	0.000247639	0.576665	1.91742e-05	4.4291e-05
1634782_s_at	9.43745	9.4809	9.68067	9.69283	9.69042	0.000249237	0.581439	1.93362e-05	4.44174e-05
1635286_at	8.53038	8.46519	8.21258	8.10056	8.12023	0.000249237	0.581388	1.93339e-05	4.44174e-05
1631015_s_at	13.5824	13.5797	13.6641	13.659	13.6515	0.000249337	0.582101	1.93593e-05	4.44174e-05
1639335_at	9.55658	9.63779	9.97271	10.0792	10.0881	0.000249337	0.582101	1.93588e-05	4.44174e-05
1628368_at	9.92906	10.0596	10.3604	10.3545	10.3892	0.000249635	0.583557	1.94098e-05	4.44174e-05
1628779_a_at	8.90842	8.95464	9.30794	9.36003	9.48326	0.000249635	0.583896	1.94218e-05	4.44174e-05
1629510_at	9.71167	9.59693	9.68039	9.73961	9.5291	0.000249635	0.584127	1.94301e-05	4.44174e-05
1635633_s_at	9.17087	9.15876	9.41046	9.46981	9.46717	0.000249945	0.585371	1.94734e-05	4.44506e-05
1623185_s_at	10.0113	10.1026	10.3759	10.4105	10.4309	0.000250151	0.586317	1.95068e-05	4.44612e-05
1640031_at	10.7845	10.9899	11.1902	11.0915	11.1265	0.000250538	0.587859	1.95601e-05	4.4517e-05
1637582_a_at	9.15616	9.1873	9.63359	9.65687	9.74087	0.000251217	0.590088	1.96362e-05	4.4578e-05
1629321_at	8.62902	8.6436	8.76161	8.79381	8.7572	0.000251226	0.590321	1.96446e-05	4.4578e-05
1639147_s_at	8.32875	8.31075	8.59842	8.64241	8.70538	0.000252086	0.592553	1.97196e-05	4.46826e-05
1638527_a_at	10.599	10.6999	11.0472	11.0812	11.1348	0.000252655	0.594318	1.97796e-05	4.47529e-05
1627410_at	10.5541	10.6574	11.0272	11.0496	11.1377	0.00025311	0.596094	1.98407e-05	4.47601e-05
1633794_a_at	10.216	10.2646	10.6822	10.6527	10.6673	0.00025311	0.596062	1.9839e-05	4.47601e-05
1634298_at	9.73274	9.84046	10.0667	10.0346	9.91158	0.00025341	0.598016	1.99086e-05	4.48381e-05
1632318_at	8.59588	8.62857	8.81335	8.84017	8.86434	0.000253597	0.598738	1.99333e-05	4.48381e-05
1625756_at	10.3629	10.5416	10.8271	10.8468	10.742	0.000254317	0.601326	2.00222e-05	4.49562e-05
1632533_at	10.4444	10.5657	10.8075	10.8243	10.8074	0.000254437	0.601941	2.0044e-05	4.49562e-05
1627419_at	10.4992	10.6326	11.0229	11.0371	10.9854	0.000255587	0.605894	2.0179e-05	4.51392e-05
1635819_at	9.04857	9.15183	9.41398	9.48456	9.52443	0.000255587	0.606024	2.0184e-05	4.51392e-05
1626707_a_at	11.1792	11.2593	11.4993	11.5119	11.4381	0.000255805	0.606902	2.02146e-05	4.51423e-05
1630860_at	9.94464	9.97189	10.3165	10.3959	10.3884	0.000256023	0.608495	2.0271e-05	4.51632e-05
1632078_at	10.0027	10.0937	10.3426	10.3504	10.339	0.000256068	0.608818	2.02824e-05	4.51632e-05
1624727_s_at	9.74377	9.8683	10.1384	10.1527	10.1369	0.0002568	0.61099	2.03562e-05	4.52335e-05
1640293_s_at	9.12872	9.17324	9.55571	9.63711	9.64633	0.000256906	0.61146	2.03725e-05	4.52335e-05
1633805_a_at	9.56836	9.66121	9.90958	9.98526	10.018	0.000257288	0.613629	2.04482e-05	4.52787e-05
1626585_s_at	9.93724	9.96404	10.2144	10.2597	10.2891	0.000257737	0.614955	2.04937e-05	4.52787e-05
1638738_s_at	10.5426	10.6397	11.0495	11.0607	11.1042	0.000257752	0.615209	2.05029e-05	4.52787e-05
1624986_at	11.8349	11.9302	12.1833	12.1527	12.2122	0.000258093	0.617062	2.05674e-05	4.52787e-05
1626883_at	9.10053	9.28547	9.5203	9.57972	9.61977	0.000258095	0.617762	2.05934e-05	4.52787e-05
1630106_at	9.15552	9.21692	9.49106	9.53807	9.48835	0.000258095	0.617513	2.05838e-05	4.52787e-05
1628853_at	8.44366	8.45458	8.76352	8.775	8.81154	0.000258165	0.618355	2.06139e-05	4.52787e-05
1624231_s_at	10.9026	11.047	11.3397	11.3856	11.3589	0.000258877	0.620721	2.06955e-05	4.52787e-05
1624385_at	9.11956	9.17184	9.63737	9.71864	9.7277	0.00025908	0.621425	2.07197e-05	4.52787e-05
1634295_at	9.57147	9.62495	9.85654	9.85799	9.91401	0.000259164	0.622062	2.07423e-05	4.52787e-05
1638486_at	8.93475	8.9986	9.45776	9.49537	9.53408	0.000259164	0.622009	2.07398e-05	4.52787e-05
1640282_at	8.65489	8.7643	8.89456	8.8984	8.88549	0.000259334	0.622688	2.07639e-05	4.52787e-05
1632574_at	8.89504	8.97499	9.12277	9.10543	9.11289	0.000259526	0.623803	2.08031e-05	4.52787e-05
1637352_a_at	10.5743	10.6504	10.9201	10.9905	10.9821	0.000259526	0.623667	2.07979e-05	4.52787e-05
1626261_s_at	11.6687	11.7921	11.9986	12.0194	12.07	0.000259596	0.624845	2.08406e-05	4.52966e-05
1639318_at	10.5331	10.6279	10.8538	10.9572	10.9014	0.000260073	0.626498	2.08972e-05	4.53045e-05
1640332_at	8.93091	9.03416	9.23596	9.15834	9.23672	0.000260073	0.626648	2.09029e-05	4.53045e-05
1633448_at	8.9518	9.00543	9.225	9.21539	9.20892	0.000261342	0.630365	2.1029e-05	4.54314e-05
1631313_at	9.45775	9.55744	9.88433	9.92271	9.91627	0.000262314	0.634248	2.11635e-05	4.54314e-05
1625702_s_at	9.38393	9.51567	9.76398	9.78142	9.75971	0.000262386	0.63486	2.11853e-05	4.54314e-05
1629078_s_at	10.2205	10.3385	10.6763	10.7058	10.7497	0.000262481	0.635311	2.12011e-05	4.54314e-05
1633780_at	8.41767	8.48749	8.70083	8.66215	8.64567	0.000262487	0.635546	2.12096e-05	4.54314e-05
1623023_at	9.65992	9.7593	10.1597	10.2692	10.2751	0.000262756	0.636637	2.12474e-05	4.54314e-05
1629012_at	10.1487	10.2045	10.4126	10.4161	10.4494	0.00026304	0.637588	2.12799e-05	4.54314e-05
1641341_at	9.78131	9.78122	10.0668	10.0818	10.0452	0.000263587	0.639757	2.13551e-05	4.54314e-05
1640796_a_at	8.98322	9.00765	9.35814	9.40384	9.50092	0.000263637	0.640099	2.13673e-05	4.54314e-05
1637830_s_at	10.6679	10.7165	11.0362	11.0838	10.9843	0.000263943	0.641062	2.14001e-05	4.54314e-05
1628390_at	10.246	10.3727	10.6916	10.7645	10.7535	0.000263962	0.641772	2.1426e-05	4.54314e-05
1634253_at	10.728	10.8061	11.0814	11.1303	11.0741	0.000263962	0.641616	2.14193e-05	4.54314e-05
1634533_at	10.1097	10.24	10.3836	10.4128	10.3619	0.000264311	0.643091	2.14714e-05	4.54314e-05
1641412_at	9.09512	9.20238	9.50116	9.62775	9.59243	0.000264311	0.643285	2.14786e-05	4.54314e-05
1630514_at	9.61034	9.73286	10.0525	10.1356	10.1704	0.000264748	0.645898	2.15702e-05	4.54314e-05
1637665_at	9.08048	9.12149	9.46747	9.52272	9.53294	0.000264748	0.645899	2.1571e-05	4.54314e-05
1639405_at	8.20856	8.14476	8.4141	8.44258	8.46401	0.000264748	0.64574	2.15628e-05	4.54314e-05
1639700_s_at	9.43339	9.5033	9.88413	9.91069	9.98596	0.000264748	0.645781	2.15648e-05	4.54314e-05
1622982_at	9.55203	9.655	9.92063	9.92108	9.91513	0.000264754	0.646693	2.15989e-05	4.54314e-05
1623490_at	9.61682	9.74038	10.0819	10.1697	10.201	0.000264754	0.646693	2.15991e-05	4.54314e-05
1627816_a_at	9.77074	9.78884	9.88864	10.2404	10.1351	0.000264754	0.646254	2.15835e-05	4.54314e-05
1641359_at	10.3412	10.473	10.6523	10.6285	10.641	0.000264754	0.646929	2.16082e-05	4.54314e-05
1628245_at	8.1922	8.2007	8.35701	8.39996	8.40145	0.000264977	0.64801	2.16465e-05	4.54501e-05
1634200_a_at	9.59226	9.6251	10.0235	10.0276	10.1594	0.000266042	0.651506	2.17662e-05	4.56131e-05
1629815_at	8.51677	8.43974	8.42105	8.40383	8.37208	0.000266207	0.652133	2.17879e-05	4.56131e-05
1641201_at	8.49092	8.45954	8.22813	8.15644	8.10034	0.00026641	0.652853	2.18127e-05	4.56131e-05
1635507_at	8.55326	8.56681	8.92787	8.81486	8.53993	0.000266738	0.654268	2.18607e-05	4.56517e-05
1634256_a_at	8.52027	8.54585	8.62021	8.66729	8.66307	0.00026709	0.656527	2.1942e-05	4.57596e-05
1629981_at	9.47895	9.51977	9.72395	9.71082	9.66983	0.000267998	0.659681	2.20496e-05	4.58135e-05
1625198_at	8.20582	8.23732	8.49579	8.50619	8.56694	0.000268009	0.660132	2.20669e-05	4.58135e-05
1641563_at	9.4666	9.5344	9.76773	9.85042	9.75387	0.000268016	0.660372	2.20757e-05	4.58135e-05
1625017_at	9.33844	9.3799	9.68097	9.70245	9.53456	0.000268309	0.661627	2.21191e-05	4.58135e-05
1635156_s_at	9.33784	9.34561	9.85212	9.94082	9.95871	0.000268309	0.661991	2.21328e-05	4.58135e-05
1634993_at	9.83192	9.88207	10.1471	10.227	10.1439	0.000268366	0.662355	2.21457e-05	4.58135e-05
1633501_s_at	9.8796	9.93124	10.3614	10.4744	10.4437	0.00026884	0.664647	2.2226e-05	4.59182e-05
1625762_s_at	9.34339	9.21916	8.90694	8.83593	8.84854	0.000269269	0.666382	2.22863e-05	4.59813e-05
1632974_s_at	9.6118	9.65557	10.0722	10.0982	10.1516	0.000269835	0.668693	2.23662e-05	4.59916e-05
1638343_at	9.06627	9.1768	9.37643	9.34311	9.28938	0.000269835	0.668531	2.23596e-05	4.59916e-05
1627119_at	12.2959	12.5175	12.8521	12.8057	12.7994	0.000269908	0.66909	2.23806e-05	4.59916e-05
1640233_at	10.2605	10.4024	10.7087	10.7676	10.7824	0.000270285	0.670858	2.24412e-05	4.60549e-05
1634157_at	9.17181	9.29371	9.39172	9.44197	9.47454	0.00027074	0.672506	2.24994e-05	4.61131e-05
1637859_at	8.28525	8.26527	8.50111	8.57166	8.56646	0.000271392	0.675256	2.25952e-05	4.61789e-05
1631729_at	8.82011	8.88676	9.02159	9.0387	9.04051	0.000271927	0.677281	2.26644e-05	4.61789e-05
1632057_at	8.8445	8.85166	9.05961	9.06763	9.02016	0.000271927	0.677564	2.26747e-05	4.61789e-05
1627948_at	9.36778	9.44816	9.90132	10.0195	10.1135	0.000272407	0.679442	2.27405e-05	4.61789e-05
1622923_at	8.62817	8.67395	8.90612	8.96105	8.9526	0.000272969	0.681734	2.28196e-05	4.61789e-05
1627434_at	8.90506	9.05745	9.36907	9.4326	9.43686	0.000272969	0.682364	2.28437e-05	4.61789e-05
1641556_a_at	9.06258	9.10946	9.33189	9.38251	9.45587	0.000272969	0.682154	2.28351e-05	4.61789e-05
1641653_at	9.03021	9.11897	9.50085	9.55511	9.57393	0.000272969	0.681877	2.28251e-05	4.61789e-05
1628861_at	8.99653	9.0809	9.25669	9.27654	9.23478	0.0002731	0.683228	2.28741e-05	4.61789e-05
1634213_at	9.48248	9.56911	9.77096	9.78467	9.7269	0.0002731	0.683375	2.28798e-05	4.61789e-05
1639940_at	8.85208	8.85846	9.24753	9.24486	9.15667	0.000273367	0.684497	2.2919e-05	4.61789e-05
1634922_s_at	9.37724	9.39837	9.53912	9.60382	9.58724	0.000273403	0.685023	2.29373e-05	4.61789e-05
1638521_a_at	9.42942	9.49684	9.60356	9.64195	9.69627	0.000273403	0.685271	2.29471e-05	4.61789e-05
1623374_a_at	9.24585	9.30272	9.69784	9.7572	9.85083	0.000273698	0.686466	2.29887e-05	4.61789e-05
1624177_at	8.442	8.45209	8.20814	8.18406	8.20142	0.000274096	0.687691	2.30305e-05	4.61789e-05
1627021_at	8.49989	8.51938	8.68255	8.7271	8.73761	0.000274145	0.688292	2.30514e-05	4.61789e-05
1638274_s_at	11.0074	11.0703	11.351	11.3239	11.3242	0.000274145	0.688499	2.30599e-05	4.61789e-05
1628141_at	10.4224	10.5025	10.8464	10.9623	11.0479	0.000274262	0.68925	2.30866e-05	4.61789e-05
1636651_a_at	10.4059	10.5295	10.8396	10.943	10.95	0.000274378	0.690268	2.3123e-05	4.61789e-05
1639770_at	9.01766	9.0601	9.57433	9.67513	9.76271	0.000274378	0.690453	2.313e-05	4.61789e-05
1624864_s_at	9.38804	9.54777	9.87094	9.93138	9.93466	0.000274464	0.692072	2.31889e-05	4.61789e-05
1625598_at	10.6266	10.6772	10.9422	10.8646	10.8553	0.000274464	0.69183	2.318e-05	4.61789e-05
1625838_at	10.8162	10.9107	11.2638	11.356	11.3984	0.000275834	0.697096	2.33627e-05	4.62499e-05
1637679_s_at	9.84187	9.93234	10.3485	10.3742	10.3718	0.000275973	0.697861	2.33891e-05	4.62499e-05
1630005_at	11.6018	11.6601	11.9596	12.0289	12.0646	0.000276237	0.698804	2.34223e-05	4.62499e-05
1631372_a_at	8.90176	8.94342	9.0954	9.16347	9.11769	0.000276313	0.699305	2.34399e-05	4.62499e-05
1629695_at	9.0503	9.1059	9.3103	9.30109	9.26576	0.000276492	0.700138	2.34694e-05	4.62499e-05
1634587_s_at	9.53333	9.63602	9.94007	10.0026	9.98764	0.000276985	0.702304	2.35451e-05	4.62499e-05
1629507_a_at	8.63482	8.72335	9.12744	9.2199	9.28321	0.000277145	0.703171	2.35758e-05	4.62499e-05
1625827_s_at	10.8321	10.9087	11.2252	11.2977	11.3291	0.000277224	0.70383	2.35995e-05	4.62499e-05
1639109_a_at	10.0144	10.1209	10.4612	10.5249	10.5209	0.000277224	0.703664	2.35931e-05	4.62499e-05
1631728_s_at	10.3987	10.4781	10.7764	10.8326	10.8492	0.000278158	0.70683	2.37016e-05	4.62499e-05
1628980_s_at	9.95723	10.0172	10.3307	10.3308	10.3365	0.000278336	0.708192	2.37505e-05	4.62499e-05
1629843_s_at	10.4367	10.5055	10.8482	10.8821	10.8933	0.000278336	0.707962	2.37417e-05	4.62499e-05
1632809_at	10.8258	10.8905	11.1127	11.1578	11.1595	0.000278336	0.707962	2.37412e-05	4.62499e-05
1633261_a_at	8.60603	8.63971	8.78052	8.85243	8.85128	0.000278336	0.708502	2.37625e-05	4.62499e-05
1635828_at	11.7342	11.7931	12.0375	12.0641	12.0559	0.000278827	0.710815	2.38425e-05	4.62499e-05
1636991_s_at	11.5572	11.5858	11.85	11.8536	11.8672	0.000278827	0.710826	2.38436e-05	4.62499e-05
1641427_at	9.15228	9.18869	9.55904	9.60797	9.64043	0.000278827	0.710566	2.38333e-05	4.62499e-05
1633821_at	9.69138	9.73084	10.1396	10.1608	10.0217	0.000279494	0.713209	2.39259e-05	4.62499e-05
1624474_at	9.82556	9.98911	10.2545	10.2643	10.2314	0.000279851	0.715258	2.39971e-05	4.62499e-05
1633016_a_at	10.7299	10.8097	11.1413	11.1935	11.1111	0.000279851	0.716567	2.40443e-05	4.62499e-05
1633286_at	9.55637	9.62694	10.0537	10.1655	10.1813	0.000279851	0.715846	2.40177e-05	4.62499e-05
1638485_s_at	9.64266	9.70834	9.91648	9.88868	9.82627	0.000279851	0.716777	2.40537e-05	4.62499e-05
1638500_at	9.83273	9.77287	9.57365	9.55424	9.53872	0.000279851	0.716455	2.40389e-05	4.62499e-05
1629411_at	11.6255	11.7015	11.9631	11.9642	11.9723	0.000280011	0.717405	2.40772e-05	4.62499e-05
1625081_at	9.08313	9.03355	8.94543	8.90922	8.84805	0.000280165	0.719163	2.41395e-05	4.62499e-05
1631877_a_at	8.80737	8.88817	9.11593	9.12212	9.12077	0.000280165	0.718665	2.41211e-05	4.62499e-05
1632259_at	10.6461	10.7428	10.9902	11.0239	10.9566	0.000280165	0.719163	2.41398e-05	4.62499e-05
1640533_at	8.81141	8.85875	9.13814	9.2283	9.23137	0.000281373	0.72276	2.42635e-05	4.62499e-05
1636775_at	9.1423	9.22522	9.37606	9.38312	9.39061	0.000281409	0.723086	2.42752e-05	4.62499e-05
1629744_a_at	9.12872	9.2085	9.63782	9.68042	9.63066	0.000281847	0.724929	2.43387e-05	4.62499e-05
1639113_at	8.72124	8.79012	9.01212	9.02413	9.04256	0.000282143	0.726605	2.43991e-05	4.62499e-05
1629417_s_at	9.54978	9.5993	10.0303	10.1038	10.1764	0.000282371	0.727426	2.44275e-05	4.62499e-05
1633793_at	8.56466	8.60094	8.88726	8.90003	8.85393	0.000282376	0.727671	2.44365e-05	4.62499e-05
1632818_at	8.6025	8.6412	8.86767	8.86944	8.85477	0.000282387	0.728015	2.44489e-05	4.62499e-05
1640871_at	8.71273	8.71626	9.02072	9.10446	9.10979	0.000282387	0.728166	2.44548e-05	4.62499e-05
1629756_at	8.55344	8.60971	8.80678	8.85193	8.87486	0.000282822	0.729967	2.45169e-05	4.62499e-05
1632724_at	10.0899	10.1969	10.4995	10.5651	10.5894	0.000282822	0.729991	2.45186e-05	4.62499e-05
1635382_at	10.0295	10.0739	10.4905	10.562	10.5196	0.000282822	0.729654	2.45056e-05	4.62499e-05
1637807_at	11.8318	11.8605	12.1235	12.1794	12.183	0.00028312	0.731462	2.45704e-05	4.62499e-05
1631216_a_at	8.47368	8.52045	8.89123	8.96814	9.04248	0.000283336	0.733845	2.46555e-05	4.62499e-05
1632573_at	8.19594	8.30659	8.59248	8.62955	8.65387	0.000283336	0.733566	2.46436e-05	4.62499e-05
1636484_at	10.0985	10.169	10.4929	10.527	10.5133	0.000283336	0.733876	2.46573e-05	4.62499e-05
1640582_at	9.64401	9.67853	10.0078	10.0616	10.0389	0.000283336	0.733425	2.4638e-05	4.62499e-05
1627768_at	10.5515	10.664	10.9325	10.8814	10.8846	0.00028429	0.737303	2.47766e-05	4.62499e-05
1633611_s_at	8.70485	8.78881	9.09563	9.156	9.19869	0.00028443	0.73826	2.48105e-05	4.62499e-05
1625321_a_at	8.24774	8.26296	8.51529	8.51542	8.51241	0.000284526	0.74095	2.49092e-05	4.62499e-05
1627721_at	8.22624	8.25596	8.41786	8.41214	8.42187	0.000284526	0.739595	2.48578e-05	4.62499e-05
1631687_at	8.73533	8.79699	9.223	9.28983	9.32559	0.000284526	0.740966	2.49106e-05	4.62499e-05
1634069_at	7.9853	7.95391	8.2179	8.25086	8.24323	0.000284526	0.739766	2.48644e-05	4.62499e-05
1636508_at	10.7586	10.8872	11.2047	11.2336	11.1732	0.000284526	0.739066	2.48392e-05	4.62499e-05
1637887_at	9.20424	9.2921	9.53702	9.58278	9.58568	0.000284526	0.740351	2.48849e-05	4.62499e-05
1638703_a_at	8.92534	8.98181	9.19129	9.2205	9.25102	0.000284526	0.740354	2.48859e-05	4.62499e-05
1639015_s_at	10.6905	10.8213	11.1409	11.1868	11.1936	0.000284526	0.740484	2.48919e-05	4.62499e-05
1639663_at	9.46643	9.5101	9.72861	9.73752	9.7438	0.000284894	0.742397	2.49604e-05	4.62499e-05
1624198_at	9.68974	9.7403	9.98061	10.0537	9.99388	0.000284912	0.743266	2.49913e-05	4.62499e-05
1630503_at	10.7577	10.8066	10.9932	10.9793	10.9651	0.000284912	0.743403	2.49967e-05	4.62499e-05
1626925_at	8.82454	8.90272	9.21717	9.30503	9.42422	0.000284976	0.74402	2.502e-05	4.62499e-05
1629020_s_at	11.3383	11.433	11.6683	11.7434	11.7099	0.000285187	0.745512	2.50727e-05	4.62499e-05
1633711_a_at	9.25663	9.29182	9.58941	9.61906	9.57857	0.000285187	0.745345	2.50662e-05	4.62499e-05
1634269_at	9.97137	10.0107	10.2316	10.2723	10.3263	0.000285187	0.746162	2.50962e-05	4.62499e-05
1624780_at	8.21762	8.21105	8.51289	8.56349	8.58104	0.000285653	0.748997	2.51984e-05	4.62499e-05
1627676_at	8.82283	8.82637	9.10431	9.1563	9.11621	0.000285653	0.748908	2.51945e-05	4.62499e-05
1633549_s_at	9.83029	9.93876	10.1773	10.2123	10.1248	0.000285653	0.748552	2.51817e-05	4.62499e-05
1635074_s_at	8.3085	8.29687	8.13332	8.07366	8.10789	0.000285653	0.749083	2.52021e-05	4.62499e-05
1639388_a_at	9.2849	9.31415	9.61781	9.6817	9.67433	0.000285702	0.749852	2.52297e-05	4.62499e-05
1624353_at	9.50652	9.61298	9.91736	10.0294	9.98572	0.000286247	0.751842	2.52983e-05	4.62499e-05
1636027_at	8.40564	8.3547	8.18481	8.18957	8.11558	0.000286372	0.753088	2.53446e-05	4.62499e-05
1636880_s_at	11.7119	11.716	12.0425	12.1173	12.176	0.000286372	0.752965	2.53396e-05	4.62499e-05
1635842_at	9.75748	9.85277	10.2056	10.3473	10.3341	0.000286565	0.755248	2.54232e-05	4.62499e-05
1639966_a_at	9.45602	9.54763	9.83275	9.78156	9.8204	0.000286565	0.754349	2.53895e-05	4.62499e-05
1627257_at	8.90243	8.98587	9.31268	9.33862	9.35182	0.000286708	0.756567	2.54711e-05	4.62499e-05
1636831_s_at	9.57459	9.72341	9.88587	10.0134	10.0102	0.000286753	0.757368	2.54997e-05	4.62499e-05
1633287_at	10.4815	10.632	10.8847	10.9009	10.9268	0.000286833	0.759256	2.55702e-05	4.62499e-05
1633764_a_at	8.75994	8.64128	8.41062	8.39304	8.39626	0.000286833	0.759166	2.55658e-05	4.62499e-05
1635705_at	9.89316	9.9588	10.3371	10.347	10.3174	0.000286833	0.758612	2.55459e-05	4.62499e-05
1641518_a_at	10.2203	10.3912	10.6506	10.7382	10.7458	0.000286833	0.759166	2.55655e-05	4.62499e-05
1628190_at	8.29743	8.26522	8.37035	8.37228	8.3734	0.000286913	0.759703	2.55861e-05	4.62499e-05
1638248_at	8.78685	8.85702	9.2745	9.38662	9.39091	0.000287755	0.762405	2.56789e-05	4.62499e-05
1632433_at	8.54554	8.58977	8.86864	8.92533	8.94989	0.000288042	0.763646	2.57215e-05	4.62499e-05
1639013_at	10.1448	10.3014	10.5248	10.5846	10.5509	0.000288042	0.763646	2.57221e-05	4.62499e-05
1631721_at	8.9399	8.87923	8.73398	8.74687	8.75724	0.000288871	0.767033	2.58391e-05	4.62499e-05
1633804_at	12.3153	12.3991	12.6546	12.6682	12.6235	0.000288871	0.767487	2.5857e-05	4.62499e-05
1638871_at	9.89775	9.9811	10.3107	10.3883	10.4395	0.000289124	0.768882	2.59075e-05	4.62499e-05
1625243_a_at	8.85087	8.86967	9.26283	9.36564	9.37244	0.000289741	0.770998	2.59805e-05	4.62499e-05
1625279_a_at	8.02594	8.10684	8.38351	8.38953	8.47173	0.000290073	0.772777	2.60431e-05	4.62499e-05
1632771_at	9.00559	9.15178	9.2449	9.27852	9.27146	0.000290073	0.772833	2.60459e-05	4.62499e-05
1633369_s_at	8.79597	8.84628	9.01141	9.0587	9.02597	0.000290073	0.772529	2.6033e-05	4.62499e-05
1641333_s_at	9.00379	9.02895	9.23724	9.33782	9.2592	0.000290073	0.772752	2.60414e-05	4.62499e-05
1625685_at	9.3886	9.42446	9.87221	9.7667	9.66279	0.000290266	0.774224	2.60945e-05	4.62499e-05
1626940_at	8.66277	8.81061	9.05217	9.11337	9.16289	0.000290266	0.774319	2.60986e-05	4.62499e-05
1631083_at	9.99425	10.0832	10.2971	10.3497	10.3526	0.000290266	0.773689	2.60756e-05	4.62499e-05
1632417_a_at	10.0889	10.1877	10.3727	10.3807	10.38	0.000290266	0.774319	2.60988e-05	4.62499e-05
1629250_at	12.0322	12.1389	12.4092	12.4441	12.44	0.00029031	0.774901	2.612e-05	4.62499e-05
1631500_at	8.25185	8.24768	8.40936	8.41006	8.39141	0.00029031	0.774901	2.61206e-05	4.62499e-05
1634419_at	8.84014	8.87581	8.98652	9.02929	8.9978	0.000290327	0.775177	2.6131e-05	4.62499e-05
1630078_a_at	10.6625	10.7733	11.1147	11.2224	11.2577	0.000290367	0.775521	2.61435e-05	4.62499e-05
1639640_at	9.77526	9.82598	10.0962	10.112	10.0579	0.000290452	0.776225	2.6169e-05	4.62499e-05
1635427_a_at	8.68218	8.75251	8.97897	9.00933	9.0899	0.000290459	0.776721	2.61875e-05	4.62499e-05
1635596_at	8.62889	8.71237	8.84813	8.87207	8.85723	0.000290459	0.776704	2.6186e-05	4.62499e-05
1630002_s_at	8.57994	8.66761	8.99338	9.08396	9.12295	0.00029073	0.777683	2.62208e-05	4.62558e-05
1633157_a_at	10.7739	10.8615	11.1793	11.2712	11.3679	0.000291429	0.779792	2.62928e-05	4.62946e-05
1636254_s_at	8.99092	8.99383	9.41683	9.48763	9.5688	0.00029144	0.780059	2.63027e-05	4.62946e-05
1628729_at	8.33306	8.37075	8.66094	8.70337	8.81721	0.000291967	0.781949	2.63682e-05	4.63355e-05
1625047_at	9.59102	9.68018	10.1339	10.1654	10.2192	0.000292063	0.782446	2.63859e-05	4.63355e-05
1632176_at	8.45305	8.45873	8.31364	8.30049	8.30685	0.000292484	0.785012	2.64777e-05	4.63913e-05
1641237_a_at	9.07153	9.13708	9.56067	9.65069	9.71552	0.000292484	0.784915	2.64736e-05	4.63913e-05
1625284_at	9.09513	9.12534	9.32912	9.33542	9.33153	0.00029297	0.786794	2.65396e-05	4.6414e-05
1626780_s_at	9.42143	9.52176	9.86859	9.92978	9.96812	0.000292999	0.787592	2.65692e-05	4.6414e-05
1632134_s_at	8.7705	8.8012	9.18096	9.25519	9.28079	0.000293043	0.788192	2.65913e-05	4.6414e-05
1634081_at	8.57662	8.55175	8.71024	8.68705	8.7368	0.000293438	0.789917	2.66513e-05	4.6414e-05
1641523_at	9.06799	9.00949	8.74995	8.66013	8.67011	0.000293438	0.789601	2.66397e-05	4.6414e-05
1630196_at	9.06219	9.18297	9.25697	9.26778	9.28235	0.000293755	0.792029	2.67279e-05	4.6414e-05
1625146_a_at	8.31785	8.32496	8.56962	8.65597	8.62468	0.000293895	0.79343	2.67779e-05	4.6414e-05
1631028_s_at	11.5384	11.6267	11.8755	11.9185	11.9362	0.000293895	0.792965	2.67613e-05	4.6414e-05
1633784_at	9.04299	9.03727	9.26863	9.32409	9.29448	0.000293895	0.794143	2.68047e-05	4.6414e-05
1634740_at	8.57439	8.6537	8.91968	8.97119	9.0196	0.000293895	0.793759	2.67899e-05	4.6414e-05
1641072_at	8.77951	8.84774	9.11916	9.17939	9.24359	0.000293895	0.794569	2.68218e-05	4.6414e-05
1637457_at	10.157	10.218	10.5868	10.6214	10.6297	0.000294117	0.795409	2.68511e-05	4.6414e-05
1637515_s_at	9.03519	9.13652	9.56854	9.62874	9.68112	0.000295107	0.799294	2.69868e-05	4.65652e-05
1636928_s_at	9.48151	9.54642	9.87978	9.95041	9.98041	0.000295286	0.80002	2.70122e-05	4.65652e-05
1632231_a_at	9.01957	9.03476	9.33273	9.38543	9.33268	0.00029535	0.801301	2.70591e-05	4.65652e-05
1633135_s_at	11.7322	11.8253	12.0599	12.0925	11.9875	0.00029535	0.800922	2.70445e-05	4.65652e-05
1639839_s_at	8.21234	8.26451	8.67148	8.74735	8.80781	0.000295592	0.802297	2.70946e-05	4.65745e-05
1627886_at	10.0793	10.1293	10.4893	10.5142	10.4972	0.000296067	0.805251	2.71998e-05	4.66561e-05
1628335_at	8.53802	8.57754	8.73886	8.76642	8.74789	0.000296233	0.805972	2.7226e-05	4.66561e-05
1640841_at	10.1386	10.2302	10.4045	10.5305	10.556	0.000296937	0.809098	2.73362e-05	4.66561e-05
1625041_at	8.87117	8.92712	9.30241	9.34739	9.3039	0.000297014	0.809793	2.73616e-05	4.66561e-05
1628243_at	9.13871	9.18704	9.55837	9.61336	9.63983	0.000297139	0.810618	2.73913e-05	4.66561e-05
1639524_at	8.82987	8.89921	9.31997	9.39598	9.44576	0.000297139	0.810578	2.7389e-05	4.66561e-05
1626457_s_at	8.08853	8.19554	8.51328	8.59538	8.67117	0.000297165	0.811175	2.7412e-05	4.66561e-05
1641448_a_at	8.39178	8.49489	8.79331	8.88199	8.8755	0.000297571	0.812767	2.74676e-05	4.66561e-05
1626673_s_at	10.2521	10.3386	10.6722	10.7127	10.722	0.000297962	0.814427	2.75256e-05	4.66561e-05
1631578_s_at	9.64844	9.74901	9.88114	9.88263	9.85833	0.000297962	0.81505	2.75494e-05	4.66561e-05
1639403_s_at	10.4679	10.4461	10.8087	10.7944	10.789	0.000297962	0.814996	2.75458e-05	4.66561e-05
1638764_at	8.91734	8.9109	8.69098	8.66272	8.62886	0.000298451	0.816876	2.7613e-05	4.66561e-05
1633927_a_at	8.89645	9.0241	9.27316	9.31013	9.25905	0.000298475	0.817185	2.76244e-05	4.66561e-05
1635714_s_at	9.35913	9.41258	9.8275	9.9038	9.90217	0.000298701	0.818048	2.76545e-05	4.66561e-05
1624302_at	8.7648	8.83907	9.05417	9.07594	9.02992	0.000298954	0.820208	2.77332e-05	4.66561e-05
1626837_a_at	10.7811	10.8595	11.1971	11.3039	11.2985	0.000298954	0.819782	2.7715e-05	4.66561e-05
1628791_at	8.37227	8.4038	8.77656	8.83567	8.88533	0.000298954	0.820931	2.77604e-05	4.66561e-05
1629479_a_at	11.7706	11.8635	12.1454	12.1239	12.0878	0.000298954	0.819819	2.77172e-05	4.66561e-05
1631568_a_at	10.007	10.0528	10.4311	10.5157	10.4977	0.000298954	0.820027	2.77261e-05	4.66561e-05
1626227_at	9.63912	9.65376	10.037	10.0334	10.0529	0.000299008	0.821397	2.77771e-05	4.66561e-05
1638414_a_at	8.87402	8.89809	9.13403	9.17574	9.19938	0.000299015	0.82183	2.77936e-05	4.66561e-05
1637763_a_at	8.59022	8.56571	8.77356	8.78957	8.7808	0.000299088	0.822272	2.78095e-05	4.66561e-05
1634924_at	9.56181	9.645	9.92494	9.96187	10.0033	0.00029928	0.823043	2.78365e-05	4.66561e-05
1631092_at	8.97583	9.03941	9.29792	9.30405	9.28463	0.000299639	0.824762	2.78975e-05	4.66702e-05
1630683_at	8.68364	8.76609	9.1047	9.15618	9.18303	0.000299641	0.825298	2.79166e-05	4.66702e-05
1626785_at	11.0605	11.1664	11.5377	11.5158	11.4958	0.000299784	0.826139	2.79479e-05	4.66702e-05
1624435_at	11.677	11.8628	12.0776	12.0607	11.9882	0.000299876	0.826637	2.79657e-05	4.66702e-05
1627280_s_at	9.47135	9.58785	9.946	9.99879	10.0257	0.000300858	0.830076	2.80849e-05	4.68058e-05
1636883_s_at	8.88533	8.8981	9.27239	9.37501	9.38563	0.000301142	0.83135	2.81299e-05	4.68058e-05
1623463_at	11.7075	11.8322	12.0519	12.0738	12.0385	0.000301354	0.832914	2.81866e-05	4.68058e-05
1635300_at	10.6567	10.7345	11.0482	11.0727	11.0298	0.000301354	0.832787	2.81814e-05	4.68058e-05
1637255_a_at	11.831	11.9443	12.1717	12.061	12.0693	0.000301444	0.83341	2.82043e-05	4.68058e-05
1640082_at	8.86703	8.9386	9.23594	9.36128	9.45199	0.000301606	0.834103	2.82287e-05	4.68058e-05
1624190_at	9.49226	9.55745	9.95569	10.0164	10.1372	0.000301794	0.835357	2.82741e-05	4.68308e-05
1641027_at	9.13963	9.20598	9.51267	9.52594	9.53009	0.000302182	0.836922	2.83289e-05	4.68714e-05
1624387_at	8.83748	8.89879	9.25771	9.32123	9.34667	0.000303051	0.840339	2.84475e-05	4.69672e-05
1628719_at	10.7021	10.7895	11.0182	11.0061	10.9952	0.000303051	0.840339	2.84476e-05	4.69672e-05
1632485_a_at	9.36006	9.34796	9.7042	9.79737	9.79293	0.000303688	0.844572	2.86014e-05	4.71707e-05
1625464_at	10.6384	10.7656	11.0893	11.0948	11.174	0.000304001	0.846759	2.86798e-05	4.72362e-05
1629694_at	8.25627	8.2365	8.51341	8.56993	8.58852	0.000305367	0.851185	2.88322e-05	4.72362e-05
1630842_s_at	9.86054	9.91809	10.2368	10.1593	10.2179	0.000305367	0.851198	2.88337e-05	4.72362e-05
1628496_at	8.24407	8.24301	8.50924	8.55529	8.64593	0.000305504	0.851829	2.8856e-05	4.72362e-05
1627865_a_at	8.7886	8.81965	9.20457	9.30488	9.28149	0.000305742	0.854134	2.89399e-05	4.72362e-05
1629663_at	9.34985	9.49579	9.87958	9.91646	9.96328	0.000305742	0.854054	2.89336e-05	4.72362e-05
1631940_s_at	9.76314	9.86123	10.2145	10.2577	10.2538	0.000305742	0.854054	2.89339e-05	4.72362e-05
1638290_at	9.67532	9.71207	9.99262	10.0413	10.0953	0.000305742	0.853667	2.89192e-05	4.72362e-05
1639660_s_at	11.0864	11.2025	11.4106	11.4163	11.4215	0.000305742	0.854229	2.89441e-05	4.72362e-05
1636040_at	11.4533	11.5425	11.7258	11.7581	11.7481	0.000305819	0.854689	2.89607e-05	4.72362e-05
1633019_a_at	9.25875	9.353	9.58672	9.61371	9.6281	0.000305964	0.855343	2.89839e-05	4.72362e-05
1623037_a_at	11.5667	11.6218	11.9054	11.9798	11.9494	0.000306145	0.856593	2.90292e-05	4.72362e-05
1632710_s_at	10.5969	10.6708	10.9337	10.9175	10.8485	0.000306999	0.859731	2.91385e-05	4.72362e-05
1625771_at	8.96785	8.88671	8.59441	8.59124	8.55499	0.000307165	0.860444	2.91636e-05	4.72362e-05
1636126_at	8.30157	8.27752	8.53861	8.61656	8.71909	0.000307294	0.861053	2.91853e-05	4.72362e-05
1636331_at	9.12829	9.17521	9.44202	9.46295	9.3903	0.000307404	0.862109	2.9224e-05	4.72362e-05
1633582_at	10.5589	10.6564	10.8821	10.9808	10.8647	0.00030757	0.863071	2.92586e-05	4.72362e-05
1633792_a_at	8.9437	9.02761	9.34752	9.38117	9.4516	0.000307611	0.863436	2.9272e-05	4.72362e-05
1631430_at	8.82294	8.86584	9.04634	9.10042	9.11012	0.0003077	0.863936	2.92899e-05	4.72362e-05
1631832_at	11.1731	11.2557	11.5986	11.6028	11.5519	0.000307838	0.864572	2.93125e-05	4.72362e-05
1624168_at	9.35698	9.31318	9.6434	9.67339	9.67995	0.000307885	0.864992	2.93277e-05	4.72362e-05
1625338_at	9.06866	9.07507	9.24567	9.33625	9.24537	0.000307885	0.86571	2.93551e-05	4.72362e-05
1638126_at	10.835	10.8979	11.1826	11.2195	11.1977	0.000307885	0.86595	2.93642e-05	4.72362e-05
1641498_at	9.91891	10.0022	10.1983	10.2148	10.2	0.000307896	0.86623	2.93747e-05	4.72362e-05
1626808_s_at	10.8034	10.8373	11.242	11.2451	11.1589	0.000308174	0.868837	2.94701e-05	4.73127e-05
1628673_at	9.81788	9.86444	10.13	10.1667	10.1653	0.000308174	0.869202	2.94835e-05	4.73127e-05
1639984_at	8.65381	8.73669	9.03252	9.08407	9.09687	0.000309064	0.872768	2.96094e-05	4.73607e-05
1640849_at	11.3378	11.5141	11.706	11.6714	11.651	0.000309064	0.872541	2.96007e-05	4.73607e-05
1625978_at	8.91436	8.97345	9.23308	9.30172	9.29625	0.000309081	0.8733	2.96285e-05	4.73607e-05
1625514_s_at	9.22017	9.3107	9.65295	9.68006	9.76538	0.000309148	0.874282	2.96648e-05	4.73607e-05
1633693_at	8.82008	8.79082	8.56349	8.54542	8.50407	0.000309148	0.874306	2.96667e-05	4.73607e-05
1623376_s_at	10.877	10.9718	11.3271	11.4105	11.3375	0.000309243	0.875272	2.97025e-05	4.7369e-05
1624176_at	8.93825	9.00773	9.39923	9.43475	9.51879	0.000310376	0.879423	2.98464e-05	4.75494e-05
1640995_at	9.92111	10.0175	10.2105	10.2254	10.2037	0.000310707	0.881173	2.99098e-05	4.75915e-05
1637100_at	9.47002	9.54565	9.66988	9.68912	9.69158	0.000311053	0.883157	2.99812e-05	4.75915e-05
1638820_at	9.39169	9.46988	9.68318	9.77588	9.72463	0.000311294	0.884093	3.0014e-05	4.75915e-05
1624337_at	11.1955	11.3004	11.5498	11.573	11.5639	0.00031134	0.88594	3.00818e-05	4.75915e-05
1639274_at	8.51682	8.45595	8.31317	8.28063	8.31183	0.00031134	0.886251	3.00944e-05	4.75915e-05
1626794_at	7.7239	7.80447	8.03824	8.06368	8.03801	0.000311537	0.888004	3.0157e-05	4.75915e-05
1627665_at	10.0011	10.0759	10.2523	10.2881	10.2594	0.000311537	0.888041	3.01593e-05	4.75915e-05
1632374_at	8.90945	8.94258	9.29284	9.31636	9.29521	0.000311537	0.888254	3.01686e-05	4.75915e-05
1635802_s_at	9.12714	9.2299	9.46261	9.55394	9.48395	0.000311537	0.88809	3.0162e-05	4.75915e-05
1636488_at	11.4491	11.5885	11.8876	11.8716	11.7315	0.000311537	0.888581	3.01808e-05	4.75915e-05
1632679_s_at	8.45367	8.49953	8.79198	8.8364	8.9295	0.000312572	0.892008	3.03002e-05	4.77188e-05
1641157_at	9.16816	9.23901	9.35917	9.3846	9.37688	0.000312758	0.893044	3.03375e-05	4.77188e-05
1625195_s_at	9.8569	9.90328	10.3445	10.3686	10.3318	0.000312831	0.893506	3.03542e-05	4.77188e-05
1631328_s_at	10.1208	10.1991	10.4302	10.424	10.3688	0.000313236	0.895671	3.04319e-05	4.77346e-05
1634859_at	8.37023	8.34864	8.58558	8.62541	8.71522	0.000313236	0.895604	3.04286e-05	4.77346e-05
1639140_at	9.47202	9.49077	9.73819	9.77768	9.78796	0.000313395	0.896377	3.04569e-05	4.77346e-05
1631931_s_at	10.1685	10.265	10.6163	10.7215	10.6781	0.000313966	0.899982	3.05856e-05	4.77437e-05
1640377_s_at	8.91262	8.93708	9.28015	9.32885	9.35908	0.000313966	0.899331	3.05614e-05	4.77437e-05
1640486_s_at	9.55468	9.65061	9.84573	9.8739	9.84272	0.000313966	0.900033	3.05894e-05	4.77437e-05
1641548_at	9.25976	9.28448	9.52616	9.56769	9.56155	0.000313966	0.899982	3.05863e-05	4.77437e-05
1637509_s_at	10.4436	10.5813	10.8678	10.849	10.8264	0.000314151	0.900818	3.06172e-05	4.77437e-05
1635018_at	8.62548	8.68297	8.81063	8.8062	8.83402	0.000315609	0.905253	3.07689e-05	4.79107e-05
1627818_s_at	11.7893	11.8668	12.1553	12.1859	12.2019	0.00031581	0.906082	3.07982e-05	4.79107e-05
1629453_at	8.70848	8.72466	8.93229	8.97349	8.99928	0.000316045	0.907011	3.08308e-05	4.79107e-05
1623009_at	8.91938	8.95555	9.10231	9.11075	9.11845	0.000316191	0.907686	3.08548e-05	4.79107e-05
1624550_at	8.44589	8.46044	8.63129	8.61725	8.51231	0.000316243	0.908345	3.08793e-05	4.79107e-05
1627456_s_at	8.98989	9.00083	9.50497	9.62955	9.61041	0.00031661	0.909653	3.09248e-05	4.79112e-05
1634170_a_at	8.94242	8.98581	9.20235	9.21565	9.22485	0.000316714	0.910208	3.09447e-05	4.79112e-05
1633646_at	12.7307	12.7921	12.9816	13.0754	13.0252	0.000316801	0.910965	3.09726e-05	4.79112e-05
1628254_at	9.42493	9.47985	9.89951	9.9803	10.0286	0.00031697	0.913223	3.10546e-05	4.799e-05
1639060_at	9.36828	9.46814	9.73531	9.74261	9.78051	0.000317567	0.916487	3.11741e-05	4.80751e-05
1638963_s_at	9.78605	9.87814	10.2136	10.2793	10.3357	0.000317612	0.916874	3.11883e-05	4.80751e-05
1635567_s_at	9.73752	9.8566	10.2238	10.3059	10.33	0.000318047	0.918641	3.12505e-05	4.80751e-05
1629748_s_at	9.4382	9.42156	9.60185	9.65173	9.61228	0.000318308	0.920267	3.1308e-05	4.80751e-05
1631481_a_at	9.40631	9.44369	9.91223	9.986	10.0154	0.000318308	0.92083	3.13303e-05	4.80751e-05
1635961_at	11.0298	11.0968	11.3473	11.4312	11.384	0.000318308	0.919866	3.12933e-05	4.80751e-05
1637150_at	11.3565	11.4766	11.7779	11.8231	11.7536	0.000318308	0.920929	3.13348e-05	4.80751e-05
1637308_at	8.34916	8.31587	8.5548	8.5672	8.6167	0.000318552	0.92189	3.13685e-05	4.80751e-05
1639118_a_at	9.7368	9.7653	10.0226	10.1178	10.0761	0.000318668	0.922481	3.13897e-05	4.80751e-05
1640912_s_at	10.2352	10.3765	10.6249	10.6817	10.6896	0.000319112	0.924278	3.1453e-05	4.81112e-05
1626368_at	9.25298	9.32419	9.58814	9.68325	9.67798	0.00031924	0.924908	3.14755e-05	4.81112e-05
1634683_at	8.8992	8.95551	9.3715	9.41513	9.48393	0.00031988	0.927273	3.15582e-05	4.81324e-05
1624929_at	8.74717	8.81391	8.99917	8.97769	8.99191	0.000319914	0.927935	3.15828e-05	4.81324e-05
1637993_at	8.78679	8.91055	9.2341	9.12456	9.15931	0.000319914	0.92764	3.15717e-05	4.81324e-05
1641233_a_at	10.3807	10.488	10.7295	10.7662	10.746	0.000319985	0.92912	3.16275e-05	4.8153e-05
1631499_a_at	10.1709	10.2472	10.4982	10.6112	10.6148	0.000320181	0.930974	3.1696e-05	4.82098e-05
1634962_s_at	9.04229	9.07205	9.47047	9.56466	9.57536	0.000320569	0.93236	3.17442e-05	4.82356e-05
1631591_at	8.60624	8.60098	8.83118	8.8596	8.84919	0.000321027	0.934206	3.18092e-05	4.82869e-05
1623943_at	9.47948	9.56328	9.88675	9.88985	10.0008	0.000321839	0.937342	3.19193e-05	4.84065e-05
1629325_at	11.0046	11.1544	11.4469	11.5145	11.5029	0.000322157	0.93936	3.19913e-05	4.84681e-05
1638832_at	13.5598	13.5885	13.6338	13.6344	13.6403	0.000322991	0.94458	3.21822e-05	4.8646e-05
1641300_s_at	10.3243	10.374	10.7124	10.7607	10.8093	0.000322991	0.944519	3.2179e-05	4.8646e-05
1634913_s_at	9.20386	9.25502	9.5812	9.64712	9.66803	0.000323039	0.945236	3.22068e-05	4.8646e-05
1626411_at	10.2189	10.254	10.5106	10.5428	10.5254	0.000323119	0.946011	3.22346e-05	4.8646e-05
1630396_at	8.67699	8.73971	9.07692	9.1086	9.07945	0.000323641	0.947774	3.22965e-05	4.8662e-05
1634805_at	7.78331	7.83834	7.97145	7.95178	8.00401	0.000323658	0.948085	3.23082e-05	4.8662e-05
1639757_at	9.16566	9.22284	9.41302	9.41347	9.41621	0.000323994	0.949327	3.23517e-05	4.86801e-05
1638937_at	10.1665	10.3055	10.5773	10.6665	10.6981	0.000325656	0.955762	3.25776e-05	4.89451e-05
1632135_a_at	9.39686	9.45423	9.84118	9.88397	9.90508	0.000325692	0.956127	3.25912e-05	4.89451e-05
1638962_at	8.37927	8.43463	8.59559	8.63876	8.6206	0.000326255	0.958042	3.26576e-05	4.89947e-05
1637428_a_at	10.2957	10.3205	10.6034	10.6019	10.6434	0.000326456	0.958891	3.26876e-05	4.89947e-05
1624838_a_at	9.17451	9.18984	9.68884	9.81737	9.92005	0.000326999	0.960749	3.27521e-05	4.90438e-05
1631149_s_at	9.35481	9.40296	9.67639	9.68987	9.6962	0.000327502	0.963275	3.28426e-05	4.91317e-05
1630075_s_at	9.3029	9.33584	9.68534	9.76734	9.83552	0.00032769	0.964179	3.28746e-05	4.9132e-05
1625145_a_at	9.70541	9.76288	10.1726	10.2056	10.2292	0.00032952	0.970527	3.30956e-05	4.9307e-05
1638953_a_at	9.8307	9.94401	10.3015	10.3624	10.3738	0.00032952	0.970294	3.30865e-05	4.9307e-05
1624581_at	10.3198	10.4152	10.683	10.736	10.7413	0.000329556	0.971158	3.31193e-05	4.9307e-05
1625732_at	8.33566	8.4003	8.67512	8.77906	8.82595	0.000329556	0.970948	3.3111e-05	4.9307e-05
1624265_at	9.50151	9.50802	9.73477	9.78532	9.72438	0.000329756	0.972119	3.31532e-05	4.93099e-05
1637948_at	8.60354	8.59045	8.38208	8.34417	8.31646	0.000331459	0.978355	3.33716e-05	4.95394e-05
1641312_at	9.54691	9.59031	9.80107	9.82246	9.83761	0.000331459	0.977826	3.33513e-05	4.95394e-05
1633607_at	8.34965	8.41041	8.27679	8.27724	8.26343	0.000331672	0.979396	3.34082e-05	4.95462e-05
1638758_at	9.91626	10.0284	10.2232	10.2918	10.2861	0.000331906	0.980471	3.34472e-05	4.95559e-05
1629563_at	10.4897	10.6471	10.9145	10.8864	10.896	0.000332019	0.981334	3.34789e-05	4.95559e-05
1634838_at	8.26545	8.24108	8.27023	8.35536	8.19266	0.000332532	0.984708	3.3602e-05	4.9634e-05
1631161_at	8.84021	8.94854	9.36079	9.42559	9.42892	0.000332756	0.986476	3.36647e-05	4.9634e-05
1632680_at	8.64957	8.65997	8.75402	8.76615	8.77184	0.000332756	0.986538	3.36691e-05	4.9634e-05
1638173_s_at	10.2725	10.302	10.5896	10.6591	10.5754	0.000332756	0.986698	3.36757e-05	4.9634e-05
1638929_at	8.64093	8.69732	9.07754	9.14486	9.14797	0.000332904	0.987405	3.3701e-05	4.9634e-05
1632281_at	8.56245	8.65307	9.0702	9.16227	9.19817	0.000333034	0.988056	3.37244e-05	4.9634e-05
1636106_s_at	8.81921	8.82589	9.17429	9.30904	9.25273	0.000333812	0.991429	3.38441e-05	4.97239e-05
1624296_at	8.49892	8.40796	8.41203	8.38955	8.38518	0.000333839	0.991774	3.3857e-05	4.97239e-05
1627515_at	10.2388	10.241	10.6784	10.6937	10.7041	0.000333883	0.992438	3.3882e-05	4.97239e-05
1630918_at	8.69332	8.79283	9.02753	9.05991	9.06317	0.000334234	0.994151	3.39416e-05	4.97312e-05
1637000_at	12.0055	12.1397	12.3064	12.369	12.4011	0.000334234	0.9944	3.39513e-05	4.97312e-05
1640311_s_at	10.6481	10.7333	10.997	11.0075	10.9706	0.000335146	1	3.41644e-05	4.99959e-05
1631371_s_at	8.42396	8.42584	8.76656	8.81375	8.84524	0.000335841	1	3.43032e-05	5.00568e-05
1635995_a_at	8.54229	8.5468	8.73647	8.785	8.80825	0.000335841	1	3.4302e-05	5.00568e-05
1637648_at	9.71686	9.79895	10.0037	10.0533	9.94917	0.000335841	1	3.42795e-05	5.00568e-05
1640191_a_at	9.11074	9.09639	9.42878	9.48301	9.58272	0.000336574	1	3.44132e-05	5.017e-05
1627136_at	10.029	10.136	10.4633	10.5356	10.5063	0.000336827	1	3.44784e-05	5.01955e-05
1627668_s_at	10.4531	10.5223	10.8451	10.8868	10.9126	0.000336827	1	3.44957e-05	5.01955e-05
1631181_a_at	8.42766	8.47029	8.53746	8.57888	8.56493	0.000337482	1	3.46406e-05	5.03116e-05
1636914_at	10.7142	10.782	11.1051	11.1506	11.0844	0.000337482	1	3.46118e-05	5.03116e-05
1625763_at	11.0985	11.1607	11.4542	11.4394	11.4101	0.000338119	1	3.47164e-05	5.03744e-05
1640750_at	9.07218	9.22577	9.62572	9.69579	9.71019	0.00033869	1	3.47854e-05	5.04272e-05
1634492_s_at	8.37957	8.47971	8.83166	8.93636	8.95253	0.000339134	1	3.48518e-05	5.04761e-05
1625223_a_at	10.7882	10.8348	11.1207	11.1088	11.0791	0.000339876	1	3.50171e-05	5.05077e-05
1626219_s_at	10.7781	10.8436	11.0896	11.1138	11.1521	0.000339922	1	3.50579e-05	5.05077e-05
1629696_a_at	9.89109	9.90312	10.3755	10.495	10.407	0.000339922	1	3.50375e-05	5.05077e-05
1630323_at	8.12324	8.11805	7.97741	7.92059	7.94497	0.000339922	1	3.50564e-05	5.05077e-05
1625533_at	11.1261	11.2522	11.4943	11.5138	11.4824	0.00034029	1	3.51168e-05	5.05077e-05
1629930_s_at	10.1181	10.1504	10.445	10.4912	10.4907	0.000340479	1	3.51676e-05	5.05077e-05
1635307_at	8.95025	9.05427	9.54838	9.53741	9.59212	0.000340479	1	3.51567e-05	5.05077e-05
1641564_a_at	9.39304	9.49041	9.75905	9.77789	9.75038	0.000340843	1	3.52419e-05	5.05077e-05
1624412_at	8.78409	8.84927	9.31979	9.35883	9.41416	0.000340952	1	3.53025e-05	5.05077e-05
1628436_at	8.44016	8.42148	8.29027	8.28636	8.28663	0.000340952	1	3.52926e-05	5.05077e-05
1632392_s_at	10.4942	10.5681	10.7004	10.7588	10.6654	0.000340952	1	3.53106e-05	5.05077e-05
1635342_at	10.1047	10.1878	10.4331	10.4927	10.467	0.000340952	1	3.53039e-05	5.05077e-05
1636970_at	10.4958	10.5602	10.7812	10.8634	10.8692	0.000340952	1	3.53095e-05	5.05077e-05
1624787_s_at	8.35023	8.38706	8.46655	8.53248	8.54076	0.000341277	1	3.53558e-05	5.05077e-05
1635631_a_at	9.15971	9.19838	9.2826	9.27862	9.3481	0.000341277	1	3.53757e-05	5.05077e-05
1636496_at	9.03477	9.11685	9.42397	9.51738	9.54964	0.000341379	1	3.53966e-05	5.05077e-05
1638171_s_at	9.25906	9.3392	9.54808	9.5223	9.60671	0.00034193	1	3.55062e-05	5.05624e-05
1627002_at	8.76383	8.72966	8.96575	8.98659	8.93902	0.000342036	1	3.55277e-05	5.05624e-05
1623264_at	9.35335	9.4432	9.68059	9.73402	9.73077	0.000342243	1	3.55598e-05	5.05624e-05
1629752_at	9.31186	9.41887	9.57385	9.59929	9.64099	0.000342654	1	3.56443e-05	5.05624e-05
1634555_at	9.29068	9.34238	9.57091	9.58908	9.60232	0.000342654	1	3.56238e-05	5.05624e-05
1628282_at	8.77941	8.80372	9.05583	9.04944	9.09138	0.000343138	1	3.57159e-05	5.05624e-05
1631521_at	8.13057	8.11702	8.0098	8.00484	7.96529	0.000344006	1	3.58169e-05	5.05624e-05
1639242_a_at	10.626	10.7205	11	10.9877	11.0651	0.000344546	1	3.58941e-05	5.05624e-05
1630703_at	10.0818	10.1776	10.4369	10.4734	10.5208	0.000344567	1	3.59069e-05	5.05624e-05
1623387_at	8.80554	8.86121	9.07514	9.10611	9.10027	0.000344681	1	3.60443e-05	5.05624e-05
1624037_s_at	9.50966	9.63076	9.97734	10.0724	10.0468	0.000344681	1	3.60411e-05	5.05624e-05
1625343_at	9.05549	9.11287	9.43002	9.45918	9.43422	0.000344681	1	3.61072e-05	5.05624e-05
1626947_s_at	9.96478	10.0641	10.4279	10.5036	10.5098	0.000344681	1	3.5994e-05	5.05624e-05
1632756_at	8.88854	8.88604	9.06815	9.12944	9.09107	0.000344681	1	3.60648e-05	5.05624e-05
1636248_at	9.63468	9.62436	10.1503	10.1302	10.1714	0.000344681	1	3.60916e-05	5.05624e-05
1639006_at	8.52357	8.48681	8.4168	8.397	8.39983	0.000344681	1	3.60177e-05	5.05624e-05
1639535_at	8.84409	8.9159	9.31969	9.39171	9.44042	0.000344681	1	3.59899e-05	5.05624e-05
1639588_at	9.05034	9.08917	9.55362	9.59648	9.67785	0.000344681	1	3.59709e-05	5.05624e-05
1623797_at	9.3759	9.4287	9.58376	9.60828	9.62923	0.000344787	1	3.61652e-05	5.05624e-05
1640303_a_at	11.9236	12.0235	12.3018	12.202	12.2735	0.000344787	1	3.6164e-05	5.05624e-05
1635727_a_at	10.2422	10.3642	10.5806	10.6454	10.658	0.000344866	1	3.62232e-05	5.05624e-05
1641460_at	11.2115	11.2978	11.5732	11.6221	11.6043	0.000344866	1	3.62238e-05	5.05624e-05
1623698_s_at	9.91865	10.0373	10.3151	10.3436	10.373	0.000345019	1	3.62822e-05	5.05624e-05
1624499_s_at	10.316	10.3315	10.5052	10.5365	10.5204	0.000345019	1	3.62656e-05	5.05624e-05
1629369_at	8.30632	8.31306	8.43972	8.45195	8.48242	0.000345019	1	3.62725e-05	5.05624e-05
1639720_at	8.73288	8.61878	8.48596	8.48447	8.48212	0.00034532	1	3.63243e-05	5.05624e-05
1626044_at	10.994	11.0551	11.3354	11.4195	11.4595	0.000345424	1	3.63459e-05	5.05624e-05
1634021_a_at	8.50851	8.54943	8.92291	8.99255	9.01287	0.000345445	1	3.63587e-05	5.05624e-05
1630729_at	8.30776	8.37149	8.51926	8.61371	8.59069	0.000345583	1	3.63838e-05	5.05624e-05
1628481_at	9.27674	9.36505	9.56191	9.56696	9.58203	0.000345807	1	3.64392e-05	5.05939e-05
1633026_a_at	9.30646	9.3272	9.77721	9.88968	9.90264	0.000346579	1	3.65526e-05	5.07058e-05
1627634_at	11.9504	12.0035	12.2876	12.2486	12.1745	0.000346805	1	3.65976e-05	5.07227e-05
1629252_at	8.46731	8.52472	8.88132	8.9251	8.95489	0.000346935	1	3.66514e-05	5.07327e-05
1625891_at	9.13325	9.22051	9.45858	9.48673	9.51015	0.000346992	1	3.66705e-05	5.07327e-05
1636145_at	9.12542	9.2716	9.43	9.3853	9.38147	0.000347113	1	3.67046e-05	5.07345e-05
1636454_at	8.63	8.6949	8.81696	8.84611	8.83896	0.000347411	1	3.68214e-05	5.076e-05
1627454_a_at	9.85648	9.91911	10.2033	10.2541	10.2961	0.000347526	1	3.68442e-05	5.076e-05
1633613_at	10.266	10.3174	10.6156	10.6282	10.6634	0.000347601	1	3.68638e-05	5.076e-05
1626479_at	8.37492	8.3415	8.48422	8.52298	8.32856	0.000347749	1	3.69106e-05	5.076e-05
1634168_s_at	9.74556	9.89381	10.0221	10.0349	10.0364	0.000347749	1	3.69093e-05	5.076e-05
1627765_a_at	8.74473	8.80576	9.28067	9.32437	9.37667	0.000347834	1	3.69303e-05	5.076e-05
1625856_at	9.19871	9.25713	9.68057	9.76038	9.75577	0.000348171	1	3.70515e-05	5.076e-05
1628842_s_at	10.8926	10.997	11.2334	11.3084	11.3319	0.000348171	1	3.6997e-05	5.076e-05
1635754_at	9.30761	9.37995	9.75268	9.7638	9.84911	0.000348171	1	3.70176e-05	5.076e-05
1636673_s_at	9.03547	9.12678	9.57637	9.63857	9.65564	0.000348171	1	3.70502e-05	5.076e-05
1632815_at	9.64282	9.68832	9.93554	9.99797	10.0063	0.00034864	1	3.71228e-05	5.08126e-05
1632045_at	8.2962	8.30955	8.10058	8.02952	8.08541	0.000349921	1	3.73021e-05	5.10128e-05
1627054_at	8.72133	8.74803	9.26823	9.30382	9.38284	0.000351786	1	3.75333e-05	5.12442e-05
1633517_at	8.91635	8.95079	9.18484	9.25656	9.30765	0.000352157	1	3.76176e-05	5.12442e-05
1634191_at	9.54378	9.56133	9.86112	9.85999	9.90422	0.000352157	1	3.76682e-05	5.12442e-05
1635768_at	10.5073	10.6134	10.6719	10.7102	10.6722	0.000352157	1	3.76663e-05	5.12442e-05
1637442_at	8.48036	8.50862	8.7065	8.78884	8.79045	0.000352157	1	3.76294e-05	5.12442e-05
1633878_at	8.92903	8.9751	9.10019	9.15762	9.16225	0.000352183	1	3.76837e-05	5.12442e-05
1633633_s_at	8.40313	8.42021	8.53719	8.63749	8.58175	0.000352266	1	3.77034e-05	5.12442e-05
1630026_s_at	8.448	8.56759	8.91393	8.97993	9.03586	0.000352594	1	3.77757e-05	5.12973e-05
1634061_a_at	9.45536	9.5233	9.97931	10.048	10.0235	0.000352768	1	3.7822e-05	5.13151e-05
1638208_at	9.21397	9.27287	9.58721	9.56807	9.60133	0.000353359	1	3.79212e-05	5.14046e-05
1629487_at	9.16315	9.21097	9.54223	9.56717	9.35257	0.000353628	1	3.79685e-05	5.14236e-05
1634474_s_at	9.93307	9.96061	10.2272	10.2588	10.2419	0.00035461	1	3.81228e-05	5.14931e-05
1636491_at	9.75397	9.91858	10.1623	10.1408	10.083	0.00035461	1	3.81284e-05	5.14931e-05
1623737_a_at	10.6265	10.7212	11.044	11.0363	10.9711	0.000354728	1	3.81962e-05	5.14931e-05
1626676_at	9.21501	9.31171	9.5742	9.66533	9.7701	0.000354728	1	3.8201e-05	5.14931e-05
1629165_at	8.48352	8.52848	8.71519	8.75876	8.76966	0.000354728	1	3.81915e-05	5.14931e-05
1637710_at	9.43049	9.46052	9.71406	9.71973	9.7286	0.000354889	1	3.82345e-05	5.14931e-05
1637662_at	10.5802	10.6491	10.9853	11.0035	10.9708	0.000354944	1	3.82531e-05	5.14931e-05
1625196_a_at	9.946	10.019	10.3338	10.3866	10.4873	0.000355186	1	3.83094e-05	5.15241e-05
1637189_at	8.55288	8.62279	8.78282	8.81983	8.8072	0.000357288	1	3.86465e-05	5.19322e-05
1625747_at	8.47748	8.48328	8.81891	8.85636	8.87536	0.000358121	1	3.87588e-05	5.19831e-05
1637703_a_at	9.11103	9.16338	9.54499	9.59836	9.64241	0.000358121	1	3.87695e-05	5.19831e-05
1625175_s_at	9.55363	9.62139	9.885	9.89199	9.87483	0.000358166	1	3.87853e-05	5.19831e-05
1624502_a_at	9.4572	9.49926	9.76178	9.83601	9.83624	0.000358302	1	3.88221e-05	5.19874e-05
1632238_at	8.94989	9.02737	9.55732	9.59605	9.71833	0.000358614	1	3.88669e-05	5.20023e-05
1635070_at	10.951	11.0292	11.2489	11.2766	11.1786	0.000358841	1	3.89135e-05	5.20196e-05
1627821_s_at	10.3525	10.4988	10.8224	10.9303	10.9424	0.000359277	1	3.90049e-05	5.20848e-05
1630524_at	8.80424	8.86285	9.31575	9.42313	9.43232	0.000359413	1	3.90306e-05	5.20848e-05
1637369_at	9.02445	9.0771	9.13703	9.17424	9.15046	0.000359613	1	3.90634e-05	5.20848e-05
1634919_at	8.89686	8.91727	9.07314	9.06064	9.08476	0.000359996	1	3.91161e-05	5.21101e-05
1640429_a_at	10.124	10.1848	10.5237	10.5485	10.5553	0.000360184	1	3.91586e-05	5.21218e-05
1626574_at	9.65912	9.82199	10.0424	10.1338	10.078	0.000360645	1	3.92308e-05	5.2173e-05
1631018_at	8.06471	8.057	8.33622	8.38155	8.39859	0.000361034	1	3.92842e-05	5.21851e-05
1634722_s_at	9.76109	9.87959	10.21	10.2443	10.1777	0.000361252	1	3.93412e-05	5.21851e-05
1638417_at	8.58289	8.75351	8.49478	8.4547	8.54386	0.000361252	1	3.93368e-05	5.21851e-05
1641685_at	8.73184	8.81555	9.07778	9.12066	9.16204	0.000361682	1	3.94029e-05	5.21975e-05
1629741_at	8.37017	8.39044	8.73585	8.76412	8.78684	0.000361854	1	3.94401e-05	5.21975e-05
1638141_x_at	8.72495	8.70436	8.51524	8.44324	8.47908	0.000361861	1	3.94519e-05	5.21975e-05
1631637_a_at	10.8216	10.9218	11.1841	11.2286	11.2546	0.000362287	1	3.95428e-05	5.22365e-05
1627749_at	9.45644	9.54939	9.79363	9.81912	9.81326	0.000362728	1	3.96021e-05	5.22365e-05
1635755_a_at	8.54834	8.6207	8.84358	8.87965	8.91966	0.000362869	1	3.96331e-05	5.22365e-05
1623404_at	8.77181	8.75001	8.93463	8.88143	8.90341	0.000362908	1	3.96551e-05	5.22365e-05
1640058_at	9.36166	9.45401	9.93231	9.93549	9.98278	0.000363544	1	3.97581e-05	5.22365e-05
1623936_at	10.7102	10.8072	10.9818	11.0037	10.9519	0.000363572	1	3.97922e-05	5.22365e-05
1641494_at	10.5424	10.6293	10.8407	10.8551	10.7806	0.000363572	1	3.97891e-05	5.22365e-05
1636943_s_at	9.96435	10.071	10.337	10.3788	10.3033	0.000363588	1	3.98075e-05	5.22365e-05
1631130_at	8.75426	8.7998	8.97687	9.04569	8.99815	0.000363657	1	3.98262e-05	5.22365e-05
1626602_at	12.9133	13.0076	13.1125	13.1257	13.0586	0.000363754	1	3.98815e-05	5.22365e-05
1625215_s_at	10.7083	10.7496	11.0159	11.0753	11.1105	0.000363876	1	3.99535e-05	5.22365e-05
1629030_a_at	9.03275	9.14113	9.45697	9.48386	9.4878	0.000363876	1	3.9943e-05	5.22365e-05
1633839_at	9.03304	9.10279	9.27434	9.24223	9.26268	0.000363876	1	3.99316e-05	5.22365e-05
1636170_at	9.24537	9.31727	9.56697	9.60136	9.58795	0.000363876	1	3.99618e-05	5.22365e-05
1631844_at	8.55372	8.61848	8.95826	9.05341	9.08449	0.000363937	1	3.99884e-05	5.22365e-05
1634316_at	9.06511	9.04963	9.26616	9.27875	9.28641	0.000366142	1	4.03118e-05	5.25701e-05
1640202_at	12.1175	12.2286	12.4291	12.4102	12.3801	0.000366142	1	4.03083e-05	5.25701e-05
1625604_at	10.3043	10.447	10.6997	10.6698	10.6668	0.000366813	1	4.04082e-05	5.2607e-05
1638807_s_at	9.16567	9.26046	9.4131	9.47038	9.47532	0.000366813	1	4.04074e-05	5.2607e-05
1629087_s_at	8.97624	8.92031	8.67279	8.68241	8.67302	0.000367432	1	4.05102e-05	5.2685e-05
1630756_at	9.13979	9.20071	9.47781	9.53751	9.59533	0.000367773	1	4.05704e-05	5.2685e-05
1637024_at	11.6515	11.7235	11.9766	11.9933	11.9593	0.000367773	1	4.05598e-05	5.2685e-05
1638004_at	11.2263	11.3822	11.6668	11.7155	11.7166	0.000368135	1	4.06328e-05	5.27217e-05
1625876_at	9.76584	9.91946	10.1514	10.239	10.2018	0.000369339	1	4.07771e-05	5.28646e-05
1630269_s_at	8.0594	7.9987	8.30175	8.36079	8.38686	0.000370014	1	4.0897e-05	5.29312e-05
1639052_a_at	9.87207	9.95714	10.2896	10.303	10.2807	0.000370014	1	4.08945e-05	5.29312e-05
1640295_a_at	8.133	8.17706	8.67233	8.48857	8.26874	0.000370594	1	4.1018e-05	5.3029e-05
1639023_at	8.79496	8.85981	9.03915	9.06026	9.04993	0.00037082	1	4.10588e-05	5.3029e-05
1639028_a_at	10.9592	11.0892	11.3711	11.431	11.4345	0.00037082	1	4.10771e-05	5.3029e-05
1639613_at	8.53658	8.58383	8.75547	8.7956	8.76171	0.00037091	1	4.11098e-05	5.3029e-05
1623277_at	9.66018	9.66737	10.1079	10.199	10.2169	0.000371272	1	4.1193e-05	5.3092e-05
1626840_a_at	10.4303	10.5215	10.801	10.7632	10.7901	0.000371451	1	4.12609e-05	5.31352e-05
1639596_at	10.4432	10.45	10.8925	10.9303	11.043	0.000371695	1	4.13108e-05	5.31551e-05
1636187_at	8.05713	8.01883	7.89807	7.91259	7.85874	0.000371928	1	4.13769e-05	5.31959e-05
1634641_a_at	11.8453	11.9733	12.2124	12.1403	12.1133	0.000372408	1	4.14644e-05	5.32099e-05
1624535_at	10.3035	10.3564	10.7645	10.7916	10.7952	0.000372579	1	4.15119e-05	5.32099e-05
1637558_at	9.67131	9.68144	9.98159	10.0282	10.0021	0.000372628	1	4.15288e-05	5.32099e-05
1627398_a_at	10.9904	11.032	11.2705	11.3076	11.241	0.000372852	1	4.15652e-05	5.32099e-05
1637851_at	8.39532	8.40076	8.61001	8.63611	8.62516	0.000372909	1	4.15926e-05	5.32099e-05
1640736_at	10.8079	10.8364	11.1792	11.1356	11.2106	0.000372909	1	4.15944e-05	5.32099e-05
1624288_at	8.63987	8.70327	8.83866	8.89229	8.83265	0.000373549	1	4.16948e-05	5.32512e-05
1634779_at	8.58093	8.64864	8.9947	9.08951	9.14812	0.000373549	1	4.17134e-05	5.32512e-05
1627719_at	8.93217	8.96276	9.26282	9.32823	9.30792	0.000373557	1	4.17355e-05	5.32512e-05
1637541_at	8.90444	8.9715	9.08407	9.09065	9.07395	0.000373611	1	4.17645e-05	5.32512e-05
1629767_s_at	9.88243	10.0377	10.3381	10.4069	10.4328	0.000374117	1	4.18562e-05	5.32621e-05
1632200_s_at	8.94739	8.94234	9.08761	9.11601	9.07618	0.000374117	1	4.18573e-05	5.32621e-05
1624301_at	8.97118	8.98626	9.2092	9.23579	9.2304	0.000374304	1	4.19055e-05	5.32621e-05
1637554_a_at	9.67023	9.66703	9.9033	9.9169	9.93773	0.000374304	1	4.19109e-05	5.32621e-05
1632894_at	9.77894	9.83713	10.0663	10.1147	10.0771	0.000375142	1	4.20277e-05	5.3265e-05
1626844_at	9.90896	9.9668	10.2319	10.2996	10.2822	0.000375288	1	4.20715e-05	5.3265e-05
1630764_at	9.52916	9.57633	9.79644	9.79889	9.84066	0.000375288	1	4.21233e-05	5.3265e-05
1631013_at	9.26501	9.3553	9.76717	9.83263	9.87454	0.000375288	1	4.2124e-05	5.3265e-05
1637054_s_at	8.59545	8.62156	8.90552	8.97359	9.00461	0.000375288	1	4.21246e-05	5.3265e-05
1640691_at	9.17673	9.25546	9.52532	9.57692	9.5917	0.000375288	1	4.20798e-05	5.3265e-05
1623580_at	12.346	12.3961	12.6798	12.7492	12.7884	0.000375683	1	4.22189e-05	5.3265e-05
1627184_at	8.7874	8.8941	9.07909	9.12983	9.12531	0.000375683	1	4.22234e-05	5.3265e-05
1640886_a_at	9.74321	9.79213	10.1342	10.1584	10.2768	0.000375683	1	4.21845e-05	5.3265e-05
1635703_s_at	9.5592	9.63662	10.0672	10.0728	10.1458	0.000376249	1	4.23643e-05	5.33787e-05
1639576_at	9.61152	9.65284	9.9807	10.0045	9.98748	0.000376249	1	4.23826e-05	5.33787e-05
1636655_s_at	8.94244	8.9596	8.61297	8.58747	8.60209	0.0003763	1	4.24806e-05	5.34585e-05
1633568_s_at	9.31458	9.35674	9.67891	9.70938	9.70932	0.000376739	1	4.25996e-05	5.35647e-05
1629623_at	9.16289	9.25815	9.57486	9.56547	9.56826	0.000377512	1	4.27564e-05	5.36056e-05
1634625_at	9.49372	9.5728	9.88606	9.95719	9.90534	0.000377686	1	4.27877e-05	5.36056e-05
1626815_a_at	9.43166	9.49546	9.68137	9.73255	9.73531	0.000378099	1	4.29537e-05	5.36056e-05
1630882_s_at	9.75212	9.79249	9.95996	9.97371	10	0.000378099	1	4.28989e-05	5.36056e-05
1633527_a_at	8.9389	8.93608	9.15935	9.16254	9.16044	0.000378099	1	4.29913e-05	5.36056e-05
1634093_at	10.8046	10.9136	11.2266	11.3209	11.3258	0.000378099	1	4.29732e-05	5.36056e-05
1634656_s_at	10.2844	10.4298	10.7317	10.6958	10.6548	0.000378099	1	4.29798e-05	5.36056e-05
1637940_s_at	9.33837	9.46133	9.63283	9.60262	9.66539	0.000378099	1	4.29323e-05	5.36056e-05
1640703_at	8.98688	9.06088	9.25011	9.26684	9.24539	0.000378099	1	4.28632e-05	5.36056e-05
1629877_at	8.03934	8.11236	8.46135	8.50458	8.62069	0.000378124	1	4.30149e-05	5.36056e-05
1625250_at	9.66158	9.70503	9.92324	9.95426	9.93585	0.000378174	1	4.30518e-05	5.36056e-05
1637787_a_at	9.49015	9.54387	9.70367	9.74588	9.74237	0.000378202	1	4.30667e-05	5.36056e-05
1639947_s_at	9.08402	9.10873	9.3664	9.38625	9.36397	0.000378245	1	4.30831e-05	5.36056e-05
1635684_a_at	10.9596	11.0656	11.3492	11.4783	11.4445	0.00037865	1	4.31525e-05	5.36356e-05
1631516_s_at	8.50256	8.52572	8.94678	9.04137	9.02211	0.000378759	1	4.31766e-05	5.36356e-05
1624297_at	8.92472	9.05511	9.25322	9.34196	9.36932	0.000380524	1	4.35082e-05	5.39726e-05
1635360_at	9.96838	10.0663	10.3512	10.4527	10.4687	0.000380524	1	4.35178e-05	5.39726e-05
1640968_a_at	11.1307	11.225	11.4241	11.5034	11.4899	0.000380783	1	4.35591e-05	5.39805e-05
1638187_at	8.92411	8.83909	8.58391	8.54224	8.52069	0.000381185	1	4.36168e-05	5.39971e-05
1629251_at	9.09267	9.17173	9.3439	9.36078	9.38657	0.000381268	1	4.36496e-05	5.39971e-05
1626657_a_at	8.65135	8.6799	8.86187	8.89539	8.88747	0.000381407	1	4.36773e-05	5.39971e-05
1631348_at	8.31584	8.34214	8.59449	8.67933	8.6036	0.000382607	1	4.38264e-05	5.41245e-05
1632752_at	9.21341	9.27599	9.49266	9.5273	9.54816	0.000382712	1	4.38854e-05	5.41245e-05
1640371_a_at	7.94546	8.00418	8.27013	8.35531	8.40961	0.000382712	1	4.38611e-05	5.41245e-05
1635218_at	10.5554	10.6256	10.907	10.9275	10.8846	0.000382944	1	4.39355e-05	5.41274e-05
1636015_s_at	10.2241	10.3077	10.9762	10.2401	10.3742	0.000383036	1	4.39578e-05	5.41274e-05
1625317_at	8.69507	8.6915	8.84814	8.82604	8.86928	0.00038427	1	4.41348e-05	5.42904e-05
1625359_at	8.61543	8.60672	8.3802	8.34032	8.3332	0.000384612	1	4.42213e-05	5.42904e-05
1627788_at	9.07419	9.11737	9.26468	9.29145	9.24649	0.000384612	1	4.42123e-05	5.42904e-05
1637496_at	8.94262	8.92006	8.90691	8.84381	8.77909	0.000384795	1	4.42625e-05	5.42904e-05
1632757_a_at	9.58516	9.5247	9.72495	9.74949	9.71844	0.000384895	1	4.4301e-05	5.42904e-05
1641380_a_at	8.91145	8.99611	9.3264	9.40997	9.41986	0.000384895	1	4.42956e-05	5.42904e-05
1641605_at	10.1617	10.2084	10.5045	10.5762	10.534	0.000385917	1	4.44686e-05	5.44526e-05
1627702_at	9.60081	9.68382	9.94968	9.96983	9.93672	0.000387058	1	4.46332e-05	5.46109e-05
1637314_at	9.10656	9.18409	9.55325	9.58574	9.57938	0.0003877	1	4.47245e-05	5.46311e-05
1641566_s_at	10.9793	11.083	11.3407	11.4509	11.3895	0.0003877	1	4.4731e-05	5.46311e-05
1627259_a_at	8.56083	8.56349	8.87407	8.94406	8.99275	0.000388079	1	4.47985e-05	5.46311e-05
1641689_at	9.6849	9.70274	9.94474	9.95794	9.93777	0.00038818	1	4.48221e-05	5.46311e-05
1626790_s_at	8.56897	8.62717	8.84596	8.89939	8.91673	0.000388895	1	4.49615e-05	5.46311e-05
1639200_at	9.14763	9.08536	8.71754	8.71245	8.65766	0.000388895	1	4.49205e-05	5.46311e-05
1640271_s_at	9.00578	9.07106	9.4076	9.51798	9.57369	0.000388895	1	4.49449e-05	5.46311e-05
1629961_s_at	9.60932	9.74802	10.1291	10.1702	10.1722	0.000389046	1	4.50024e-05	5.46311e-05
1634015_s_at	9.94348	10.0246	10.2786	10.3507	10.3266	0.00038965	1	4.51113e-05	5.46311e-05
1623848_a_at	8.50004	8.46551	8.23274	8.23586	8.16161	0.000390037	1	4.5199e-05	5.46311e-05
1641279_at	10.5843	10.6356	10.9833	11.1017	11.1591	0.000390037	1	4.51753e-05	5.46311e-05
1627908_at	8.68908	8.64394	8.56393	8.54948	8.53186	0.000390083	1	4.52213e-05	5.46311e-05
1624907_at	11.0981	11.1371	11.6141	11.6218	11.646	0.000390556	1	4.53945e-05	5.46311e-05
1625228_at	9.01844	9.09657	9.35022	9.38709	9.34755	0.000390556	1	4.53803e-05	5.46311e-05
1627617_at	8.96981	9.0283	9.37501	9.45318	9.43024	0.000390556	1	4.5315e-05	5.46311e-05
1630552_at	8.85612	8.77934	8.63926	8.57802	8.56053	0.000390556	1	4.5342e-05	5.46311e-05
1638465_at	8.95778	9.01487	9.11182	9.12554	9.14976	0.000390556	1	4.53593e-05	5.46311e-05
1640395_a_at	8.897	9.02098	9.29429	9.28199	9.33306	0.000390556	1	4.54032e-05	5.46311e-05
1641023_at	8.53143	8.62422	8.91377	8.95102	8.97984	0.000390556	1	4.53962e-05	5.46311e-05
1629306_at	9.08362	9.14899	9.48111	9.5463	9.54687	0.000390956	1	4.55607e-05	5.46311e-05
1631354_x_at	8.82455	8.73368	8.54304	8.46489	8.50812	0.000390956	1	4.54799e-05	5.46311e-05
1631769_at	8.98358	9.00251	9.41074	9.45101	9.51921	0.000390956	1	4.5541e-05	5.46311e-05
1639223_a_at	8.24394	8.21924	8.6192	8.69987	8.66647	0.00039128	1	4.56121e-05	5.46311e-05
1637716_a_at	9.71549	9.74709	10.099	10.2101	10.0981	0.00039131	1	4.56396e-05	5.46311e-05
1640251_s_at	10.7573	10.8533	11.1558	11.224	11.1574	0.00039131	1	4.56359e-05	5.46311e-05
1627884_at	9.30593	9.39626	9.65057	9.66252	9.6481	0.000391476	1	4.5717e-05	5.46311e-05
1628292_s_at	10.0246	10.0725	10.3629	10.4341	10.4262	0.000391476	1	4.56712e-05	5.46311e-05
1632170_a_at	8.48958	8.54047	8.70554	8.70981	8.66506	0.000391476	1	4.57751e-05	5.46311e-05
1638176_at	8.52838	8.49775	8.72094	8.78539	8.78117	0.000391476	1	4.5781e-05	5.46311e-05
1639818_s_at	9.36796	9.3868	9.68352	9.75269	9.7716	0.000391476	1	4.57351e-05	5.46311e-05
1640083_at	9.03775	9.09121	9.33535	9.39937	9.36366	0.000391476	1	4.57029e-05	5.46311e-05
1641339_at	9.02709	9.11388	9.34359	9.40537	9.38306	0.000391476	1	4.57403e-05	5.46311e-05
1626621_at	8.58753	8.65726	8.89738	8.95872	8.98866	0.000391801	1	4.58893e-05	5.46461e-05
1638398_at	8.49523	8.5287	8.75923	8.80421	8.81601	0.000391801	1	4.58604e-05	5.46461e-05
1630570_at	8.78104	8.81455	9.08653	9.13506	9.21404	0.000391992	1	4.59804e-05	5.46461e-05
1632394_s_at	11.1277	11.2448	11.5359	11.564	11.6062	0.000391992	1	4.59487e-05	5.46461e-05
1634504_a_at	9.74594	9.8022	10.0795	10.1773	10.1799	0.000391992	1	4.59787e-05	5.46461e-05
1636948_a_at	9.10309	9.13761	9.33968	9.31906	9.3533	0.000392006	1	4.60057e-05	5.46461e-05
1631541_at	10.8451	10.9949	11.1674	11.217	11.183	0.000392537	1	4.60837e-05	5.46575e-05
1630901_a_at	8.98663	9.02777	9.27389	9.3427	9.31454	0.000392807	1	4.61516e-05	5.46575e-05
1635580_at	9.22085	9.21362	9.54081	9.62697	9.63271	0.000392838	1	4.61674e-05	5.46575e-05
1630370_at	10.6952	10.8062	10.9856	10.985	10.95	0.000393288	1	4.62322e-05	5.46575e-05
1638501_at	10.4783	10.5849	10.7481	10.7703	10.7338	0.000393474	1	4.62662e-05	5.46575e-05
1629015_a_at	9.98743	10.0898	10.3769	10.4562	10.4258	0.000393732	1	4.63489e-05	5.46575e-05
1635130_a_at	9.66214	9.70643	10.0283	9.97031	9.97062	0.000393732	1	4.63364e-05	5.46575e-05
1625794_at	9.90019	9.95827	10.33	10.3732	10.4424	0.000394046	1	4.65988e-05	5.46575e-05
1625813_at	8.42447	8.37898	8.53556	8.56114	8.60003	0.000394046	1	4.65383e-05	5.46575e-05
1630388_at	8.32898	8.24176	8.0409	7.97268	7.96557	0.000394046	1	4.65513e-05	5.46575e-05
1630408_s_at	9.59002	9.66054	10.0108	10.0911	10.0729	0.000394046	1	4.65869e-05	5.46575e-05
1633283_at	10.8034	10.8394	11.2071	11.2116	11.2105	0.000394046	1	4.6501e-05	5.46575e-05
1633412_s_at	9.773	9.93616	10.2994	10.3667	10.3467	0.000394046	1	4.65526e-05	5.46575e-05
1634140_a_at	9.42519	9.4727	9.77832	9.82105	9.79117	0.000394046	1	4.65993e-05	5.46575e-05
1636576_s_at	11.3868	11.5153	11.7861	11.8862	11.798	0.000394046	1	4.65306e-05	5.46575e-05
1639084_s_at	8.51252	8.46352	8.18198	8.1599	8.13282	0.000394046	1	4.64502e-05	5.46575e-05
1629013_at	8.31583	8.3644	8.52934	8.57731	8.59705	0.000394089	1	4.66166e-05	5.46575e-05
1634303_at	9.1185	9.21822	9.52718	9.57136	9.65439	0.000394391	1	4.66644e-05	5.46721e-05
1639467_at	12.1975	12.2805	12.4547	12.4504	12.4639	0.000394588	1	4.66998e-05	5.46721e-05
1622976_at	8.03417	8.08626	8.3285	8.41566	8.37892	0.00039488	1	4.6795e-05	5.46919e-05
1625793_at	8.85047	8.92807	9.19707	9.21615	9.2479	0.00039488	1	4.67799e-05	5.46919e-05
1634452_s_at	10.6039	10.788	11.0258	11.0873	11.0912	0.000394967	1	4.68229e-05	5.46919e-05
1635352_s_at	10.4049	10.4892	10.786	10.7946	10.8019	0.000394996	1	4.68808e-05	5.47182e-05
1623708_at	9.43312	9.4287	9.72119	9.76845	9.74357	0.000395571	1	4.69981e-05	5.47699e-05
1626845_at	9.36544	9.4627	9.68614	9.83711	9.75986	0.000395571	1	4.69907e-05	5.47699e-05
1626667_at	10.2911	10.4443	10.7688	10.8529	10.8567	0.000395748	1	4.70314e-05	5.47699e-05
1627423_at	9.03754	9.15646	9.41369	9.3971	9.39579	0.000396425	1	4.71483e-05	5.48124e-05
1630361_at	8.63027	8.65597	8.83533	8.92798	8.93383	0.000396586	1	4.71796e-05	5.48124e-05
1638696_a_at	8.97017	9.01951	9.1581	9.19008	9.17072	0.000396599	1	4.71933e-05	5.48124e-05
1630213_at	8.63651	8.67253	8.78179	8.80568	8.82593	0.000396636	1	4.72098e-05	5.48124e-05
1627822_at	8.74584	8.78296	8.97375	9.02604	9.00362	0.000397256	1	4.73259e-05	5.49059e-05
1632936_at	9.1442	9.20641	9.55899	9.63952	9.69641	0.000397341	1	4.73913e-05	5.49406e-05
1632932_a_at	9.80557	9.864	10.2373	10.3577	10.3061	0.000398203	1	4.75796e-05	5.50971e-05
1625569_at	8.84411	8.87126	9.07079	9.09412	9.08706	0.000398251	1	4.75976e-05	5.50971e-05
1640435_at	11.5922	11.697	11.9063	11.9304	11.8721	0.000398681	1	4.76612e-05	5.51294e-05
1623826_at	9.71178	9.77921	10.08	10.1573	10.1455	0.000399171	1	4.77443e-05	5.51842e-05
1639014_at	7.92302	8.0162	8.22914	8.30403	8.36785	0.000399774	1	4.78654e-05	5.52828e-05
1639387_s_at	9.86009	9.93723	10.4328	10.4909	10.5385	0.000399851	1	4.79187e-05	5.52912e-05
1623271_a_at	9.81687	9.87733	10.1657	10.2532	10.127	0.000400016	1	4.80019e-05	5.52912e-05
1635475_at	8.91547	8.92903	9.07889	9.09328	9.11065	0.000400016	1	4.79771e-05	5.52912e-05
1624565_a_at	8.60379	8.62176	8.87215	8.97703	8.90241	0.000400022	1	4.80789e-05	5.52912e-05
1625078_at	11.2001	11.2774	11.5566	11.5351	11.5042	0.000400022	1	4.80526e-05	5.52912e-05
1637284_at	9.0867	9.20812	9.56277	9.62068	9.65886	0.000400022	1	4.81037e-05	5.52912e-05
1623189_at	10.0931	10.2383	10.5771	10.6589	10.6215	0.000400699	1	4.82098e-05	5.52912e-05
1630849_at	8.85355	8.79473	8.60203	8.6164	8.58322	0.000400764	1	4.82821e-05	5.52912e-05
1634849_at	9.00298	9.04339	9.37507	9.41524	9.43747	0.000400764	1	4.82708e-05	5.52912e-05
1635928_a_at	10.1793	10.2554	10.6781	10.6918	10.7703	0.000400764	1	4.82767e-05	5.52912e-05
1626798_a_at	9.26214	9.41952	9.72904	9.81149	9.80209	0.00040123	1	4.83844e-05	5.52912e-05
1632472_s_at	9.34231	9.41617	9.78983	9.82977	9.82937	0.00040123	1	4.8383e-05	5.52912e-05
1623247_at	8.75266	8.7694	8.97718	9.05728	9.03841	0.000401316	1	4.85253e-05	5.52912e-05
1631110_at	8.88484	8.90656	9.08623	9.11461	9.05633	0.000401316	1	4.8457e-05	5.52912e-05
1631979_at	9.2447	9.34422	9.50718	9.61606	9.57914	0.000401316	1	4.8511e-05	5.52912e-05
1640317_at	8.84631	8.85331	9.07696	9.11462	9.11668	0.000401316	1	4.85096e-05	5.52912e-05
1640758_at	8.05989	8.08521	8.41799	8.44475	8.45131	0.000401316	1	4.85302e-05	5.52912e-05
1623227_s_at	8.77996	8.92177	9.12276	9.1578	9.17215	0.000401764	1	4.86695e-05	5.52912e-05
1635110_at	9.61432	9.70946	9.91103	9.99208	9.94079	0.000401764	1	4.86303e-05	5.52912e-05
1639759_s_at	9.44605	9.46866	9.84696	9.95289	9.96154	0.000401764	1	4.86407e-05	5.52912e-05
1639837_at	8.67525	8.76458	9.14642	9.2303	9.26322	0.000401764	1	4.86115e-05	5.52912e-05
1623203_at	9.26175	9.36812	9.59847	9.63434	9.64986	0.000402143	1	4.87874e-05	5.52912e-05
1626199_at	8.99879	9.08459	9.26118	9.25438	9.2262	0.000402143	1	4.88029e-05	5.52912e-05
1636718_s_at	9.84393	10.0014	10.3266	10.3884	10.3775	0.000402143	1	4.87715e-05	5.52912e-05
1637193_at	9.78125	9.88869	10.2433	10.2376	10.2649	0.000402143	1	4.87908e-05	5.52912e-05
1638102_s_at	8.09824	8.04355	7.89636	7.86039	7.8973	0.000402143	1	4.87564e-05	5.52912e-05
1634297_at	8.11036	8.15671	8.31844	8.35973	8.36998	0.000402324	1	4.88619e-05	5.52914e-05
1625271_at	8.87402	8.96825	9.0763	9.11283	9.05144	0.000402467	1	4.88917e-05	5.52914e-05
1632653_at	9.59895	9.6935	10.0393	10.1098	10.1336	0.000402773	1	4.89411e-05	5.52914e-05
1632526_s_at	11.5378	11.617	11.9313	11.9408	12.0817	0.000402804	1	4.8982e-05	5.52914e-05
1635743_at	8.49264	8.54642	8.80224	8.87125	8.89523	0.000402804	1	4.89751e-05	5.52914e-05
1627124_at	8.93175	8.97435	9.30042	9.35806	9.38093	0.000403404	1	4.90673e-05	5.53473e-05
1628488_at	8.80814	8.8422	9.24313	9.30136	9.34197	0.000404143	1	4.9246e-05	5.54392e-05
1637430_s_at	9.93978	9.99746	10.3625	10.323	10.2573	0.000404143	1	4.92391e-05	5.54392e-05
1638516_s_at	9.77631	9.88319	10.1149	10.1325	10.0766	0.000404143	1	4.92564e-05	5.54392e-05
1627334_at	8.96781	8.98446	9.43502	9.54478	9.62242	0.000404798	1	4.93637e-05	5.54537e-05
1627953_at	8.51252	8.56875	8.69549	8.70396	8.70739	0.000404798	1	4.93618e-05	5.54537e-05
1624226_at	9.22673	9.22922	9.46798	9.49807	9.49568	0.000405674	1	4.95604e-05	5.54537e-05
1628240_at	10.0469	10.1302	10.338	10.3686	10.2803	0.000405674	1	4.95762e-05	5.54537e-05
1630270_s_at	13.2272	13.2535	13.3669	13.3774	13.3758	0.000405674	1	4.9586e-05	5.54537e-05
1633131_s_at	9.47062	9.49208	9.80769	9.75144	9.72141	0.000405674	1	4.95751e-05	5.54537e-05
1634487_at	10.4453	10.5174	10.9178	10.9983	10.9763	0.000405674	1	4.95744e-05	5.54537e-05
1634574_a_at	9.99971	10.1138	10.4871	10.4632	10.5373	0.000405674	1	4.95923e-05	5.54537e-05
1634576_at	8.40738	8.5276	8.65223	8.75475	8.82892	0.000405674	1	4.95635e-05	5.54537e-05
1634501_at	8.99669	9.09384	9.28688	9.29526	9.26917	0.000406287	1	4.97172e-05	5.55532e-05
1624873_at	9.7581	9.87635	10.1247	10.1623	10.1806	0.000406997	1	4.98289e-05	5.56378e-05
1625775_a_at	9.6122	9.66148	10.0398	10.1751	10.1959	0.000407493	1	4.99647e-05	5.57491e-05
1627567_at	9.47643	9.52862	9.76976	9.82761	9.84691	0.000407777	1	5.00245e-05	5.57756e-05
1624720_s_at	10.069	10.16	10.6781	10.6827	10.7569	0.000408136	1	5.00992e-05	5.57862e-05
1633274_at	8.98899	9.06036	9.384	9.39082	9.4122	0.000408136	1	5.01062e-05	5.57862e-05
1631062_at	8.64624	8.64418	8.75785	8.78402	8.749	0.000408863	1	5.02456e-05	5.59011e-05
1622947_s_at	12.082	12.2409	12.3745	12.4297	12.45	0.000409421	1	5.03267e-05	5.59511e-05
1623429_at	10.1787	10.2441	10.4948	10.4833	10.4978	0.00041007	1	5.04414e-05	5.59848e-05
1628901_at	9.06181	9.14302	9.49936	9.57116	9.59312	0.00041007	1	5.04443e-05	5.59848e-05
1623063_at	9.12594	9.26221	9.49611	9.53174	9.54369	0.000410111	1	5.04871e-05	5.59848e-05
1624981_a_at	9.84857	9.83395	10.2124	10.1861	10.1729	0.000410286	1	5.05583e-05	5.59848e-05
1625324_at	9.85873	9.8265	10.126	10.1163	10.1624	0.000410286	1	5.05589e-05	5.59848e-05
1624257_at	8.75852	8.87271	9.16576	9.23077	9.30973	0.00041031	1	5.05744e-05	5.59848e-05
1624726_s_at	11.1586	11.2911	11.5223	11.5546	11.5957	0.000411113	1	5.06983e-05	5.60818e-05
1633331_at	8.49935	8.57424	8.8606	8.93516	8.97479	0.000411414	1	5.07689e-05	5.61197e-05
1625531_at	11.1311	11.243	11.5557	11.5364	11.4419	0.000411557	1	5.08165e-05	5.61322e-05
1632537_at	7.95222	7.97962	8.23288	8.33999	8.31452	0.000411689	1	5.08581e-05	5.6138e-05
1627623_s_at	8.97451	9.10382	9.26206	9.2695	9.26752	0.000412817	1	5.10228e-05	5.62705e-05
1628279_s_at	9.90488	9.94512	10.3153	10.3382	10.3197	0.000412943	1	5.1051e-05	5.62705e-05
1637161_s_at	8.5002	8.49401	8.85995	8.90274	8.82766	0.000413397	1	5.11959e-05	5.63698e-05
1639444_a_at	9.81164	9.89564	10.2159	10.3071	10.2666	0.000413441	1	5.1214e-05	5.63698e-05
1622931_at	8.34924	8.44575	8.66905	8.74653	8.77458	0.00041363	1	5.13296e-05	5.63765e-05
1626731_at	9.99193	10.0628	10.2566	10.3036	10.2604	0.00041363	1	5.12663e-05	5.63765e-05
1636186_s_at	12.6068	12.6957	12.8713	12.8463	12.8139	0.00041363	1	5.13228e-05	5.63765e-05
1627470_at	9.05622	9.1174	9.39168	9.45146	9.43779	0.000414169	1	5.14773e-05	5.64054e-05
1630227_a_at	9.21639	9.29772	9.63911	9.72153	9.74388	0.00041435	1	5.15428e-05	5.64054e-05
1625183_at	9.07427	9.1306	9.54062	9.59233	9.64087	0.00041476	1	5.16557e-05	5.64054e-05
1627349_at	8.90642	8.95825	9.19098	9.18429	9.20581	0.00041476	1	5.17178e-05	5.64054e-05
1629175_at	8.36286	8.27779	8.15196	8.06542	8.08431	0.00041476	1	5.16624e-05	5.64054e-05
1630318_at	9.075	9.18383	9.40501	9.41772	9.36919	0.00041476	1	5.1697e-05	5.64054e-05
1633463_s_at	9.0968	9.12939	9.53865	9.58578	9.62964	0.00041476	1	5.16888e-05	5.64054e-05
1636253_at	9.82816	9.90694	10.1259	10.1485	10.1663	0.00041476	1	5.17209e-05	5.64054e-05
1636847_s_at	8.91532	8.93749	9.42036	9.48303	9.52038	0.00041476	1	5.17144e-05	5.64054e-05
1640240_s_at	8.63442	8.59475	8.80394	8.87347	8.89854	0.00041476	1	5.16713e-05	5.64054e-05
1637612_at	8.79249	8.8118	9.21902	9.26794	9.25484	0.000414961	1	5.17587e-05	5.64068e-05
1623327_at	11.038	11.1455	11.4804	11.3926	11.3785	0.000415593	1	5.19233e-05	5.65028e-05
1625898_s_at	9.03526	9.10891	9.50821	9.56734	9.58323	0.000415593	1	5.19268e-05	5.65028e-05
1629160_s_at	9.07973	9.14507	9.46425	9.50127	9.54143	0.000415872	1	5.19744e-05	5.65028e-05
1624812_at	9.26013	9.2621	9.45116	9.48002	9.49606	0.000415906	1	5.1993e-05	5.65028e-05
1637036_s_at	10.5116	10.6668	10.8308	10.8001	10.7944	0.000416361	1	5.20739e-05	5.65509e-05
1624142_a_at	10.285	10.3849	10.7185	10.7315	10.7816	0.000417601	1	5.22753e-05	5.67061e-05
1633161_at	8.38291	8.39261	8.57388	8.61704	8.57812	0.000417601	1	5.22927e-05	5.67061e-05
1626306_at	8.66013	8.64976	8.89662	8.94038	8.93384	0.000417951	1	5.23615e-05	5.67061e-05
1639944_at	11.1855	11.2404	11.4768	11.5277	11.5424	0.000417951	1	5.23636e-05	5.67061e-05
1637819_at	8.43057	8.54475	8.95567	9.00193	9.08149	0.000419227	1	5.25995e-05	5.69142e-05
1631610_at	8.72467	8.82335	9.10367	9.0524	9.03166	0.000419363	1	5.26294e-05	5.69142e-05
1628389_at	9.13683	9.24568	9.48274	9.50535	9.5061	0.00042003	1	5.27614e-05	5.69685e-05
1632260_s_at	8.33121	8.39152	8.72051	8.79058	8.87708	0.00042003	1	5.27647e-05	5.69685e-05
1637537_at	9.10261	9.16318	9.52345	9.62974	9.55657	0.00042013	1	5.27902e-05	5.69685e-05
1630964_at	9.69782	9.74442	10.0023	9.98739	10.051	0.000420627	1	5.28784e-05	5.70239e-05
1639459_a_at	9.60595	9.69147	10.0077	10.1368	10.0918	0.000421252	1	5.30087e-05	5.71245e-05
1623080_at	9.52755	9.61653	9.92685	9.95825	9.93838	0.000422154	1	5.3174e-05	5.71964e-05
1624541_at	9.14148	9.19471	9.60322	9.60809	9.70494	0.000422179	1	5.32289e-05	5.71964e-05
1626371_at	9.67408	9.78849	9.98837	10.0331	10.0234	0.000422179	1	5.32101e-05	5.71964e-05
1629080_at	9.20868	9.22458	8.93108	8.87064	8.81743	0.000422179	1	5.31989e-05	5.71964e-05
1638509_at	9.51965	9.5879	9.84209	9.89245	9.84087	0.000422415	1	5.32933e-05	5.71964e-05
1639121_at	10.6499	10.7258	10.9627	10.9905	10.9732	0.000422415	1	5.32975e-05	5.71964e-05
1639047_at	9.7992	9.8276	10.205	10.3193	10.3237	0.000423088	1	5.33968e-05	5.72529e-05
1640997_at	9.83331	9.95379	10.227	10.2621	10.3179	0.000423088	1	5.34351e-05	5.72529e-05
1641000_a_at	10.4379	10.5262	10.7382	10.8075	10.7705	0.000423096	1	5.34613e-05	5.72529e-05
1638675_at	10.9385	11.1238	11.4552	11.3451	11.3518	0.000424168	1	5.36358e-05	5.73967e-05
1625581_at	8.31957	8.39573	8.70525	8.80609	8.82597	0.000424334	1	5.36698e-05	5.73967e-05
1639288_at	8.59516	8.64466	8.87424	8.89496	8.93114	0.000424799	1	5.37676e-05	5.74438e-05
1627109_at	11.1071	11.2386	11.4671	11.4806	11.5239	0.000424801	1	5.37882e-05	5.74438e-05
1633904_at	9.59812	9.73561	9.96439	10.0154	10.0253	0.000425875	1	5.39823e-05	5.76113e-05
1639074_at	9.10907	9.21517	9.57311	9.60329	9.64895	0.000426008	1	5.40384e-05	5.76313e-05
1624429_at	8.58524	8.67023	8.92863	8.92536	8.94264	0.000426578	1	5.4185e-05	5.76511e-05
1624640_x_at	8.30844	8.32568	8.59889	8.6787	8.61107	0.000426578	1	5.41848e-05	5.76511e-05
1626575_at	9.22728	9.30899	9.60571	9.67348	9.72805	0.000426578	1	5.42448e-05	5.76511e-05
1631765_at	9.55818	9.6624	10.0237	10.0776	10.0658	0.000426578	1	5.42549e-05	5.76511e-05
1637795_at	10.6391	10.7487	10.9874	10.9322	10.8725	0.000426578	1	5.42808e-05	5.76511e-05
1639635_s_at	10.4968	10.5458	10.8243	10.8446	10.8295	0.000426578	1	5.4256e-05	5.76511e-05
1635904_s_at	9.2633	9.30999	9.57772	9.60997	9.65371	0.00042711	1	5.43616e-05	5.76973e-05
1636020_s_at	9.93138	9.96856	10.2922	10.3667	10.3367	0.000427604	1	5.44638e-05	5.77661e-05
1630025_at	9.15925	9.19915	9.31945	9.34437	9.36371	0.000428426	1	5.45949e-05	5.78654e-05
1632395_s_at	10.9471	10.97	11.2374	11.3111	11.2759	0.000429032	1	5.46852e-05	5.79214e-05
1624361_s_at	10.811	10.8477	11.0903	11.1488	11.0864	0.000429721	1	5.4839e-05	5.80043e-05
1628402_a_at	9.76279	9.85715	10.241	10.2548	10.3588	0.000429806	1	5.48629e-05	5.80043e-05
1633069_s_at	9.04691	9.1097	9.59944	9.67613	9.72465	0.000429806	1	5.48761e-05	5.80043e-05
1631142_a_at	9.95127	9.97194	10.4278	10.5051	10.6136	0.000430117	1	5.49291e-05	5.80207e-05
1624042_at	8.95258	8.99885	9.23086	9.27843	9.2882	0.000430281	1	5.49896e-05	5.80449e-05
1623989_at	9.60878	9.73645	10.1015	10.1593	10.1698	0.000430905	1	5.51478e-05	5.81101e-05
1639827_at	8.84943	8.83241	8.62954	8.5811	8.58981	0.000430905	1	5.51226e-05	5.81101e-05
1634381_a_at	9.19415	9.27011	9.51315	9.55848	9.57551	0.000430923	1	5.51642e-05	5.81101e-05
1623860_at	8.64553	8.72928	8.82977	8.81607	8.83165	0.000431818	1	5.53846e-05	5.8163e-05
1624452_a_at	8.06401	8.11105	8.33506	8.43539	8.49264	0.000431818	1	5.53979e-05	5.8163e-05
1627148_at	8.78758	8.84449	9.15839	9.16394	9.20615	0.000431818	1	5.54493e-05	5.81646e-05
1630713_at	8.86221	8.90981	9.02606	9.05946	8.97436	0.000431818	1	5.53411e-05	5.8163e-05
1638079_at	9.60665	9.76284	9.95334	10.0058	9.99349	0.000431818	1	5.53648e-05	5.8163e-05
1639054_s_at	8.08701	8.06205	8.42063	8.61637	8.5726	0.000431818	1	5.54026e-05	5.8163e-05
1627403_s_at	8.817	8.9308	9.26576	9.32116	9.31436	0.00043182	1	5.55175e-05	5.81651e-05
1640870_s_at	9.39552	9.39369	9.71426	9.65019	9.57737	0.00043182	1	5.54794e-05	5.81646e-05
1623716_at	9.57241	9.64371	9.78954	9.83406	9.7915	0.000432103	1	5.56069e-05	5.81799e-05
1630145_s_at	11.4254	11.4578	11.7551	11.7449	11.7292	0.000432103	1	5.56004e-05	5.81799e-05
1623952_a_at	8.70645	8.78551	9.0171	9.07558	9.11713	0.000433098	1	5.57614e-05	5.8281e-05
1639785_s_at	8.53291	8.58571	8.92749	9.00611	8.94443	0.000433131	1	5.5779e-05	5.8281e-05
1640653_at	10.426	10.4987	10.921	10.9292	10.9645	0.000433163	1	5.58254e-05	5.82901e-05
1628114_s_at	8.61652	8.68134	9.11195	9.17193	9.22221	0.000433605	1	5.5933e-05	5.8363e-05
1628135_s_at	10.1109	10.1678	10.3862	10.3824	10.352	0.000433901	1	5.59847e-05	5.83775e-05
1625148_s_at	11.6631	11.7243	12.0416	12.1437	12.1587	0.000434261	1	5.61534e-05	5.83958e-05
1628345_at	8.80805	8.8251	9.17507	9.25764	9.31711	0.000434261	1	5.62025e-05	5.84076e-05
1633533_at	11.4672	11.5481	11.912	11.9675	11.9732	0.000434261	1	5.61299e-05	5.83958e-05
1636347_at	8.81136	8.86502	9.1949	9.2204	9.21331	0.000434261	1	5.60972e-05	5.83958e-05
1638840_at	9.78267	9.82978	10.0203	10.0584	10.0178	0.000434261	1	5.61096e-05	5.83958e-05
1629866_at	8.6677	8.71566	9.04653	9.15161	9.18261	0.0004349	1	5.63136e-05	5.84837e-05
1630807_at	8.89269	8.89334	9.05493	9.09198	9.09478	0.000435758	1	5.64381e-05	5.85737e-05
1628739_at	9.39694	9.4287	9.56923	9.63003	9.7099	0.000436255	1	5.65427e-05	5.86428e-05
1622939_at	9.53682	9.63939	9.92463	10.0048	10.0197	0.000437325	1	5.6802e-05	5.88525e-05
1629005_a_at	9.6158	9.65827	9.95205	9.98838	9.92412	0.000437367	1	5.6821e-05	5.88525e-05
1641115_at	8.79426	8.82073	9.02465	9.0554	9.09656	0.000438082	1	5.70079e-05	5.90065e-05
1627761_at	9.22698	9.29303	9.64447	9.73578	9.72735	0.000438528	1	5.71064e-05	5.90689e-05
1624065_at	10.9136	10.9414	11.174	11.1878	11.1042	0.000439292	1	5.72343e-05	5.91092e-05
1628420_s_at	8.61689	8.60222	8.80113	8.93569	8.91367	0.000439292	1	5.72462e-05	5.91092e-05
1625011_at	10.2156	10.3419	10.5966	10.7282	10.7192	0.000439578	1	5.7441e-05	5.91092e-05
1634593_at	10.0562	10.0941	10.3916	10.4372	10.486	0.000439578	1	5.73984e-05	5.91092e-05
1634855_s_at	11.717	11.681	11.9784	12.0203	12.0164	0.000439578	1	5.73738e-05	5.91092e-05
1636791_s_at	9.8581	9.97834	10.2524	10.291	10.3207	0.000439578	1	5.74858e-05	5.91092e-05
1638748_at	10.7327	10.8214	11.1105	11.1758	11.1957	0.000439578	1	5.74051e-05	5.91092e-05
1641145_at	8.24087	8.19241	8.04855	8.0534	8.07864	0.000439578	1	5.7467e-05	5.91092e-05
1627802_s_at	9.13687	9.24399	9.65971	9.7683	9.81653	0.000439588	1	5.75006e-05	5.91092e-05
1633736_at	9.06506	9.12485	9.422	9.46453	9.48116	0.000439883	1	5.75661e-05	5.91092e-05
1639626_at	8.77485	8.75424	8.98128	9.0343	9.06751	0.000439883	1	5.75616e-05	5.91092e-05
1624484_a_at	9.21194	9.3074	9.52717	9.55337	9.51462	0.000440167	1	5.76573e-05	5.91243e-05
1632475_at	9.10893	9.18127	9.52631	9.5909	9.52498	0.000440167	1	5.76362e-05	5.91243e-05
1640504_at	9.19711	9.24887	9.41144	9.45381	9.48775	0.000440451	1	5.77216e-05	5.91347e-05
1638367_at	11.2538	11.3093	11.6864	11.676	11.6903	0.000440485	1	5.78206e-05	5.91347e-05
1638931_at	9.08614	9.13442	9.37351	9.38244	9.33684	0.000440485	1	5.78022e-05	5.91347e-05
1640465_at	9.26399	9.36908	9.83386	9.89901	9.91303	0.000440485	1	5.78185e-05	5.91347e-05
1628129_a_at	10.1347	10.1777	10.465	10.5134	10.5073	0.000441329	1	5.80075e-05	5.92867e-05
1631427_s_at	9.62075	9.78686	10.1116	10.1915	10.2311	0.000441339	1	5.80816e-05	5.93232e-05
1637676_at	10.0066	10.1219	10.3405	10.3695	10.3785	0.000441731	1	5.81875e-05	5.93921e-05
1626056_a_at	8.83607	8.89712	9.03613	9.03265	9.06626	0.000442007	1	5.82698e-05	5.94368e-05
1636302_s_at	9.38484	9.39709	9.75159	9.79548	9.80349	0.00044287	1	5.85179e-05	5.96505e-05
1639594_at	10.504	10.6272	11.0019	10.985	11.0767	0.000443029	1	5.85622e-05	5.96536e-05
1628763_at	9.7925	9.91656	10.1773	10.2506	10.2654	0.000443219	1	5.8601e-05	5.96536e-05
1623591_a_at	10.0752	10.1468	10.4336	10.4916	10.5094	0.000443575	1	5.86753e-05	5.96536e-05
1639825_at	11.5094	11.5888	11.8319	11.8832	11.8685	0.000443575	1	5.86669e-05	5.96536e-05
1625849_at	10.191	10.2393	10.464	10.4927	10.4587	0.00044379	1	5.87173e-05	5.9657e-05
1635871_at	9.6498	9.71147	9.96874	9.99351	10.0326	0.000444186	1	5.87981e-05	5.96999e-05
1623782_at	9.69379	9.72687	10.01	10.0728	10.0936	0.000445945	1	5.91119e-05	5.9951e-05
1635222_at	9.08744	9.08517	9.43852	9.47058	9.36009	0.000446064	1	5.91414e-05	5.9951e-05
1623551_at	9.69778	9.83605	10.1777	10.2416	10.2731	0.000446161	1	5.91815e-05	5.9951e-05
1623771_at	10.1301	10.2038	10.4125	10.4743	10.4487	0.000446669	1	5.93312e-05	5.9951e-05
1626660_at	8.20456	8.2154	8.03391	7.96379	7.88653	0.000446669	1	5.93278e-05	5.9951e-05
1631368_s_at	9.69012	9.75611	9.99477	10.0308	10.0311	0.000446669	1	5.93282e-05	5.9951e-05
1641579_at	9.21146	9.3549	9.43264	9.46369	9.41963	0.000446927	1	5.93791e-05	5.9951e-05
1625490_at	8.85241	8.95802	9.19791	9.17525	9.1585	0.000447175	1	5.95292e-05	5.9951e-05
1625557_at	8.87551	8.80593	8.62079	8.64112	8.58788	0.000447175	1	5.95355e-05	5.9951e-05
1634871_s_at	8.1776	8.22086	8.53509	8.64821	8.64704	0.000447175	1	5.94816e-05	5.9951e-05
1636781_at	9.08091	9.08921	9.328	9.36266	9.33017	0.000447175	1	5.9461e-05	5.9951e-05
1638397_at	10.434	10.5202	10.7576	10.828	10.736	0.000447175	1	5.95238e-05	5.9951e-05
1636816_s_at	9.26868	9.34227	9.68666	9.71584	9.71369	0.000447179	1	5.95498e-05	5.9951e-05
1635267_s_at	8.86621	8.91628	9.33538	9.40698	9.48596	0.000447446	1	5.96266e-05	5.99893e-05
1630375_at	8.74408	8.74276	8.49921	8.53216	8.52381	0.000449149	1	5.99085e-05	6.02337e-05
1638520_at	9.98363	10.0546	10.4308	10.4905	10.4594	0.000449712	1	5.99975e-05	6.02802e-05
1626581_s_at	10.1872	10.2478	10.541	10.5666	10.6059	0.00044977	1	6.00328e-05	6.02802e-05
1637328_at	9.70344	9.79238	10.0606	10.0767	10.0631	0.000449838	1	6.01597e-05	6.02924e-05
1640090_a_at	11.2426	11.3639	11.5975	11.6172	11.6506	0.000449838	1	6.0162e-05	6.02924e-05
1640146_at	9.51617	9.56961	9.79571	9.91121	9.84334	0.000449838	1	6.01021e-05	6.02924e-05
1634189_at	8.65119	8.68828	8.96106	8.95745	8.99344	0.000450605	1	6.0324e-05	6.04088e-05
1626769_s_at	9.03097	9.17065	9.52435	9.59974	9.62161	0.000450728	1	6.03812e-05	6.04088e-05
1632429_at	11.6015	11.6864	11.9447	11.944	11.9188	0.000451102	1	6.04685e-05	6.04088e-05
1634570_at	9.38559	9.38136	9.73043	9.78279	9.76465	0.000451102	1	6.04736e-05	6.04088e-05
1639397_at	11.9196	12.0425	12.4018	12.3276	12.4122	0.000451102	1	6.04492e-05	6.04088e-05
1628109_at	9.12279	9.21744	9.28565	9.36704	9.37375	0.000451752	1	6.0616e-05	6.05119e-05
1633205_at	8.40712	8.49481	8.74566	8.83609	8.86716	0.000452235	1	6.07553e-05	6.06118e-05
1631105_at	9.33866	9.40802	9.77021	9.79375	9.77964	0.000453589	1	6.10017e-05	6.08021e-05
1640892_a_at	10.9893	11.0844	11.333	11.3764	11.3891	0.000453656	1	6.10247e-05	6.08021e-05
1626820_at	9.2909	9.37617	9.52975	9.5585	9.58091	0.000453882	1	6.11235e-05	6.08221e-05
1632384_at	8.74393	8.78079	8.96347	8.97315	8.96491	0.000453882	1	6.11097e-05	6.08221e-05
1633215_at	9.11921	9.22743	9.41955	9.45953	9.44888	0.000454367	1	6.1204e-05	6.0863e-05
1626024_at	8.92532	8.98964	9.16403	9.2052	9.09771	0.000454968	1	6.13128e-05	6.09178e-05
1623712_at	9.12324	9.21313	9.41986	9.4639	9.46675	0.00045529	1	6.13841e-05	6.09178e-05
1626385_s_at	8.60384	8.61014	8.91149	9.0055	8.99717	0.000455325	1	6.14142e-05	6.09178e-05
1634208_a_at	9.93654	9.93798	10.3705	10.4346	10.5407	0.000455325	1	6.14168e-05	6.09178e-05
1632691_at	10.402	10.4982	10.711	10.7794	10.7512	0.000455353	1	6.15323e-05	6.09932e-05
1641697_at	8.34465	8.46012	8.76487	8.83974	8.84716	0.000455544	1	6.1586e-05	6.10073e-05
1637747_s_at	8.77631	8.83237	9.17175	9.23104	9.31621	0.000455998	1	6.16681e-05	6.10495e-05
1625885_at	10.3377	10.5018	10.7834	10.7321	10.7338	0.000456368	1	6.17535e-05	6.10617e-05
1628767_s_at	10.0503	10.1715	10.3351	10.4497	10.4842	0.000456491	1	6.17841e-05	6.10617e-05
1625922_a_at	8.9093	8.94729	9.1858	9.23978	9.18387	0.000456497	1	6.17989e-05	6.10617e-05
1637506_at	9.45719	9.52299	9.91239	9.94305	9.89651	0.000457532	1	6.20232e-05	6.12441e-05
1632928_at	9.02105	9.08958	9.19228	9.19998	9.19545	0.000458101	1	6.21808e-05	6.13186e-05
1632712_s_at	11.0922	11.1139	11.4079	11.4728	11.3935	0.00045828	1	6.22793e-05	6.13186e-05
1634453_at	8.76385	8.83688	9.23994	9.26951	9.2946	0.00045828	1	6.22776e-05	6.13186e-05
1634961_s_at	11.2236	11.3291	11.5715	11.6064	11.5919	0.00045828	1	6.22504e-05	6.13186e-05
1628824_s_at	8.47267	8.56192	8.80791	8.88794	8.93679	0.000458307	1	6.2297e-05	6.13186e-05
1632786_at	8.41214	8.40194	8.15124	8.12119	8.12396	0.000458746	1	6.241e-05	6.13517e-05
1640932_s_at	10.7886	10.9013	11.1224	11.1469	11.1528	0.000458746	1	6.24092e-05	6.13517e-05
1623498_at	8.76739	8.73799	8.86217	8.88164	8.90059	0.000459027	1	6.25076e-05	6.14085e-05
1632462_at	10.4414	10.565	10.8574	10.8511	10.8314	0.000459905	1	6.27021e-05	6.15605e-05
1628478_at	8.169	8.19471	8.53113	8.60625	8.64239	0.000461348	1	6.29651e-05	6.17794e-05
1627061_at	8.35223	8.38545	8.17778	8.13901	8.14471	0.00046193	1	6.31689e-05	6.18785e-05
1632234_at	9.97923	10.0264	10.3126	10.2865	10.2153	0.00046193	1	6.31151e-05	6.18785e-05
1635098_a_at	9.47408	9.54493	9.75368	9.73562	9.64647	0.00046193	1	6.31862e-05	6.18785e-05
1632989_a_at	8.43673	8.47874	8.70052	8.67597	8.70266	0.000462632	1	6.33732e-05	6.19233e-05
1640289_a_at	9.52409	9.57776	9.96479	10.0084	10.0987	0.000462632	1	6.3352e-05	6.19233e-05
1640794_at	8.97044	9.02783	9.32616	9.35228	9.36358	0.000462632	1	6.33922e-05	6.19233e-05
1641435_at	9.85137	9.89766	10.0853	10.1143	10.1143	0.000462632	1	6.33889e-05	6.19233e-05
1636587_at	8.56314	8.64521	8.74363	8.78138	8.76376	0.000463137	1	6.3481e-05	6.19709e-05
1630738_s_at	8.51677	8.56622	8.84214	8.86523	8.88856	0.000463634	1	6.36217e-05	6.19959e-05
1633341_s_at	8.65611	8.72211	9.05729	9.10948	9.1155	0.000463634	1	6.36327e-05	6.19959e-05
1628759_a_at	8.62436	8.64841	8.99582	9.08245	9.07734	0.000463739	1	6.36614e-05	6.19959e-05
1640455_a_at	10.7877	10.8962	11.1546	11.0998	11.0893	0.000463815	1	6.37013e-05	6.19959e-05
1626619_at	9.57124	9.69469	9.93349	10.029	9.90614	0.000463948	1	6.37469e-05	6.19959e-05
1633775_at	9.41634	9.50122	9.90173	9.94703	10.0253	0.000464201	1	6.37994e-05	6.19959e-05
1635788_a_at	11.2623	11.3958	11.5153	11.5164	11.5282	0.000464201	1	6.38102e-05	6.19959e-05
1630915_at	9.53736	9.64373	9.82543	9.7881	9.77488	0.000464224	1	6.38276e-05	6.19959e-05
1629452_at	9.22611	9.34128	9.57677	9.60425	9.6046	0.000464636	1	6.38985e-05	6.20157e-05
1640700_at	9.01476	9.08595	9.32563	9.34605	9.37373	0.000464645	1	6.39282e-05	6.20157e-05
1623284_at	8.50721	8.55612	8.65221	8.68547	8.65258	0.000465021	1	6.41016e-05	6.20206e-05
1627246_at	9.19329	9.16608	9.33287	9.34782	9.38697	0.000465021	1	6.40833e-05	6.20206e-05
1640856_at	8.78624	8.8251	9.08922	9.15108	9.1135	0.000465021	1	6.4107e-05	6.20206e-05
1635863_at	9.38889	9.42807	9.58957	9.66867	9.6686	0.000465099	1	6.41334e-05	6.20206e-05
1623553_a_at	9.3762	9.52868	9.82834	9.82671	9.90637	0.000465263	1	6.41774e-05	6.20206e-05
1629156_at	8.76407	8.79756	9.1229	9.21654	9.19965	0.000465263	1	6.41845e-05	6.20206e-05
1635103_at	8.79406	8.86741	9.10416	9.14709	9.16087	0.000465374	1	6.42142e-05	6.20206e-05
1628743_at	9.61136	9.68986	10.0508	10.1446	10.1474	0.000466479	1	6.4481e-05	6.22393e-05
1630814_s_at	9.57931	9.65787	9.97814	10.0506	10.0375	0.0004667	1	6.45402e-05	6.22558e-05
1637482_at	9.28809	9.36987	9.50282	9.52428	9.54912	0.000466892	1	6.46165e-05	6.22558e-05
1639771_at	9.08781	9.04863	9.30785	9.36577	9.34178	0.000466892	1	6.46384e-05	6.22558e-05
1627838_at	9.68942	9.70949	10.1779	10.2648	10.3419	0.000466919	1	6.46995e-05	6.22558e-05
1638653_a_at	10.0893	10.0491	10.4317	10.5448	10.49	0.000466919	1	6.46797e-05	6.22558e-05
1634975_at	10.1204	10.1668	10.4773	10.4992	10.5248	0.000467084	1	6.47588e-05	6.22618e-05
1630686_at	8.51147	8.49656	8.68855	8.75607	8.74536	0.000467132	1	6.47863e-05	6.22618e-05
1627680_at	8.65408	8.68432	8.88447	8.91847	8.9467	0.000467556	1	6.48738e-05	6.23005e-05
1630671_s_at	9.39042	9.45047	9.73436	9.77729	9.76575	0.000467694	1	6.49072e-05	6.23005e-05
1635513_at	9.57822	9.64598	9.89199	9.91101	9.90634	0.000468074	1	6.49887e-05	6.23179e-05
1632545_s_at	9.21729	9.30919	9.62207	9.6777	9.67938	0.000468095	1	6.5006e-05	6.23179e-05
1632567_at	9.18642	9.17816	9.60565	9.68133	9.79472	0.000468588	1	6.51033e-05	6.23725e-05
1630708_at	8.63631	8.5793	8.36237	8.29241	8.30132	0.000468777	1	6.52348e-05	6.23918e-05
1634211_at	8.70255	8.7177	8.89214	8.93708	8.97187	0.000468777	1	6.52247e-05	6.23918e-05
1635638_s_at	10.5657	10.5909	10.9406	11.0006	11.0178	0.000468777	1	6.52445e-05	6.23918e-05
1641379_a_at	9.61699	9.7208	10.0359	10.0711	10.0794	0.000469748	1	6.55382e-05	6.26339e-05
1639525_at	8.48689	8.59246	8.7626	8.8025	8.79795	0.000469953	1	6.55956e-05	6.265e-05
1640557_at	9.82745	9.86065	10.2247	10.2717	10.2784	0.000470301	1	6.56586e-05	6.26714e-05
1640409_at	9.4056	9.52416	9.73043	9.79079	9.83356	0.000470832	1	6.58367e-05	6.28026e-05
1632813_at	9.36619	9.36167	9.54928	9.56529	9.51554	0.000471604	1	6.59996e-05	6.29186e-05
1628537_s_at	8.69551	8.73134	8.87655	8.90816	8.92249	0.000472035	1	6.6089e-05	6.29186e-05
1628892_s_at	9.1786	9.2103	9.43542	9.48763	9.50516	0.000472119	1	6.61442e-05	6.29186e-05
1633186_s_at	9.30608	9.35307	9.63983	9.68883	9.66366	0.00047215	1	6.61813e-05	6.29186e-05
1634942_at	8.91657	8.94657	9.21105	9.22418	9.20875	0.00047215	1	6.61858e-05	6.29186e-05
1635881_at	9.51607	9.58278	9.68829	9.69192	9.65518	0.00047223	1	6.62466e-05	6.29186e-05
1638673_at	10.4941	10.5973	10.7448	10.7859	10.7877	0.00047223	1	6.62413e-05	6.29186e-05
1623503_at	9.76775	9.83964	10.2228	10.2838	10.3151	0.000472366	1	6.62947e-05	6.29186e-05
1639551_at	10.2987	10.4295	10.6502	10.7497	10.7251	0.000472477	1	6.63247e-05	6.29186e-05
1629228_at	9.48171	9.54773	9.88383	9.97614	9.9908	0.00047277	1	6.64094e-05	6.29603e-05
1637456_at	9.33904	9.47423	9.63251	9.70377	9.70722	0.000474102	1	6.66838e-05	6.31817e-05
1625768_s_at	8.29408	8.22328	8.50569	8.6401	8.7401	0.000474823	1	6.68726e-05	6.32772e-05
1634667_at	10.107	10.2293	10.4827	10.5839	10.5195	0.000474823	1	6.68473e-05	6.32772e-05
1625231_at	8.98818	9.04258	9.27154	9.2944	9.2917	0.000475088	1	6.69894e-05	6.32772e-05
1636977_at	9.93991	9.99716	10.3215	10.3537	10.3541	0.000475088	1	6.69732e-05	6.32772e-05
1639317_at	8.54378	8.55706	8.37176	8.31351	8.33874	0.000475088	1	6.69813e-05	6.32772e-05
1640944_at	10.0081	10.03	10.3937	10.451	10.4882	0.000475323	1	6.70597e-05	6.33049e-05
1631471_at	8.57345	8.6359	9.02913	9.08648	9.12574	0.000475767	1	6.71511e-05	6.33517e-05
1625280_at	10.0537	10.1176	10.5098	10.5996	10.628	0.000476111	1	6.72328e-05	6.33517e-05
1628319_s_at	8.37441	8.43608	8.70071	8.77584	8.78016	0.000476122	1	6.73142e-05	6.33517e-05
1632605_at	10.1655	10.307	10.5174	10.5464	10.4968	0.000476122	1	6.72798e-05	6.33517e-05
1637733_at	10.0658	10.1064	10.3682	10.3526	10.3819	0.000476122	1	6.72985e-05	6.33517e-05
1629899_at	8.68501	8.65859	9.06859	9.13495	9.13732	0.000476198	1	6.73876e-05	6.33822e-05
1639064_s_at	9.10571	9.16529	9.51147	9.55828	9.61123	0.000476537	1	6.74501e-05	6.34024e-05
1631315_at	9.32734	9.32763	9.68852	9.71698	9.66835	0.000477008	1	6.75316e-05	6.34404e-05
1628548_at	9.84406	9.97065	10.2945	10.3597	10.4185	0.000477462	1	6.76104e-05	6.34758e-05
1632550_at	8.82065	8.86037	9.23312	9.31052	9.37408	0.000478796	1	6.78141e-05	6.36284e-05
1629064_at	9.39272	9.45775	9.78687	9.83691	9.79178	0.000479103	1	6.79048e-05	6.36549e-05
1630482_at	8.39423	8.43685	8.25312	8.18843	8.21902	0.000479279	1	6.79559e-05	6.36549e-05
1633636_at	8.72063	8.67666	8.44502	8.38853	8.3843	0.000479329	1	6.80019e-05	6.36549e-05
1633654_s_at	9.56286	9.73887	10.0642	10.0836	10.0584	0.000479329	1	6.80071e-05	6.36549e-05
1625108_a_at	8.43896	8.36031	8.64871	8.7015	8.72616	0.000479555	1	6.80539e-05	6.36601e-05
1639334_at	8.29847	8.33121	8.44945	8.44008	8.40036	0.000479903	1	6.81327e-05	6.36953e-05
1623747_at	10.0417	10.1063	10.3418	10.3768	10.3464	0.000480258	1	6.81978e-05	6.37176e-05
1628974_at	8.94134	8.98869	9.28059	9.30844	9.29587	0.000480984	1	6.83305e-05	6.37992e-05
1630118_s_at	9.40901	9.49153	9.94618	9.98148	10.0268	0.000481076	1	6.83677e-05	6.37992e-05
1633260_at	9.1781	9.29392	9.60259	9.62387	9.63389	0.000481273	1	6.84331e-05	6.38217e-05
1623207_at	8.79303	8.87348	9.14696	9.21799	9.23636	0.00048191	1	6.86246e-05	6.38846e-05
1629766_at	8.91646	8.98156	9.28134	9.35793	9.40239	0.00048191	1	6.86151e-05	6.38846e-05
1636293_at	9.51933	9.61963	9.90707	9.97943	9.98775	0.00048191	1	6.85869e-05	6.38846e-05
1629234_at	10.1904	10.2989	10.6421	10.6216	10.6843	0.000482289	1	6.87082e-05	6.3924e-05
1624033_at	10.911	10.9906	11.2457	11.4291	11.3079	0.000483099	1	6.89209e-05	6.39776e-05
1625997_s_at	10.9715	11.0732	11.3313	11.3798	11.3184	0.000483099	1	6.89558e-05	6.39776e-05
1627615_at	8.18434	8.11075	7.98248	7.93281	7.94263	0.000483099	1	6.89798e-05	6.39776e-05
1631550_at	8.9086	8.91522	9.07268	9.0902	9.10893	0.000483099	1	6.89773e-05	6.39776e-05
1636140_at	8.79575	8.87242	9.01959	9.05064	9.08598	0.000483099	1	6.89243e-05	6.39776e-05
1628275_at	9.33431	9.38468	9.80935	9.77939	9.78167	0.000483365	1	6.90857e-05	6.39776e-05
1636493_at	8.7954	8.85776	9.01789	9.03123	9.04246	0.000483365	1	6.90822e-05	6.39776e-05
1636758_s_at	9.72391	9.82561	10.0864	10.126	10.173	0.000483365	1	6.90971e-05	6.39776e-05
1634311_at	8.9368	8.9972	9.40076	9.47294	9.48443	0.000483769	1	6.92455e-05	6.40766e-05
1636911_at	8.46375	8.54172	8.90623	9.02581	9.0212	0.000483967	1	6.9333e-05	6.41016e-05
1635399_s_at	8.5499	8.58591	8.87134	8.89993	8.95474	0.000483999	1	6.93591e-05	6.41016e-05
1628788_a_at	8.77176	8.77939	8.96144	8.99293	9.03089	0.0004841	1	6.93969e-05	6.41016e-05
1630784_a_at	10.6839	10.7259	11.1032	11.1233	11.122	0.000485374	1	6.96391e-05	6.42579e-05
1630771_s_at	10.4513	10.5391	10.7436	10.7513	10.7641	0.000485418	1	6.96603e-05	6.42579e-05
1626315_at	9.62477	9.69001	9.97916	10.0122	10.0848	0.000485764	1	6.97248e-05	6.42579e-05
1638690_at	9.32765	9.39227	9.75788	9.75105	9.71329	0.000485838	1	6.97639e-05	6.42579e-05
1629848_s_at	9.25513	9.29693	9.53201	9.55636	9.5705	0.000485897	1	6.97886e-05	6.42579e-05
1623160_at	8.55876	8.63462	8.99442	9.0216	9.09537	0.000486032	1	6.98378e-05	6.42579e-05
1633198_a_at	9.02183	9.13592	9.48007	9.58562	9.57518	0.000486095	1	6.98768e-05	6.42579e-05
1640509_s_at	9.81249	9.88491	10.2768	10.3009	10.342	0.000486153	1	6.98999e-05	6.42579e-05
1626113_at	8.99655	9.03619	9.26965	9.32654	9.26019	0.00048639	1	6.99839e-05	6.42579e-05
1636092_a_at	8.77024	8.76248	9.08971	9.16847	9.15969	0.00048639	1	7.00137e-05	6.42579e-05
1637300_at	9.6878	9.78665	10.0905	10.1168	10.0798	0.00048639	1	7.00235e-05	6.42579e-05
1623914_at	13.4093	13.4284	13.508	13.5198	13.4987	0.000487843	1	7.03524e-05	6.44831e-05
1631426_at	9.30604	9.42679	9.74328	9.68818	9.7349	0.000487843	1	7.03389e-05	6.44831e-05
1639969_at	8.40941	8.46513	8.56431	8.58142	8.56788	0.000488189	1	7.04174e-05	6.45044e-05
1638897_at	8.72287	8.75963	9.03773	9.05909	9.06389	0.000488214	1	7.04808e-05	6.45243e-05
1635051_a_at	9.9846	10.055	10.4156	10.4827	10.5497	0.000488664	1	7.06058e-05	6.46004e-05
1630984_at	11.0342	11.2113	11.4299	11.3813	11.5339	0.000490394	1	7.08859e-05	6.48183e-05
1634912_at	10.2478	10.2565	10.5997	10.6272	10.6893	0.000490532	1	7.09359e-05	6.48257e-05
1631394_at	9.18309	9.32819	9.65586	9.77041	9.87224	0.000490751	1	7.09826e-05	6.483e-05
1628147_at	9.31689	9.34263	9.72157	9.75724	9.86006	0.00049187	1	7.13145e-05	6.50316e-05
1633961_s_at	10.0004	10.0998	10.3619	10.376	10.3484	0.00049187	1	7.13296e-05	6.50316e-05
1637956_s_at	8.54176	8.65618	8.87769	8.93551	8.94668	0.00049187	1	7.12468e-05	6.50316e-05
1633750_s_at	9.81339	9.94798	10.1427	10.1581	10.2172	0.000491935	1	7.14104e-05	6.50669e-05
1637820_at	9.56977	9.63674	9.9003	9.95444	9.96984	0.000492156	1	7.14727e-05	6.50853e-05
1632236_at	9.26766	9.32696	9.56325	9.62022	9.59996	0.000492722	1	7.15699e-05	6.51354e-05
1623862_at	10.7445	10.7698	11.0257	11.0363	10.9303	0.000493705	1	7.17684e-05	6.52091e-05
1627312_at	9.02329	9.13508	9.53678	9.59498	9.56666	0.000493705	1	7.17774e-05	6.52091e-05
1639566_s_at	9.8173	9.84727	10.2521	10.2949	10.2936	0.000493705	1	7.17556e-05	6.52091e-05
1640679_at	8.82996	8.87537	9.13915	9.17593	9.20993	0.000493884	1	7.18601e-05	6.52458e-05
1624305_at	10.2743	10.3045	10.5664	10.5923	10.6644	0.000494584	1	7.20263e-05	6.53303e-05
1640746_at	10.1401	10.2655	10.543	10.6344	10.6124	0.000494584	1	7.20377e-05	6.53303e-05
1640633_s_at	9.95039	10.0294	10.2555	10.2978	10.3228	0.000494876	1	7.21106e-05	6.53581e-05
1634771_a_at	8.61097	8.68564	8.88726	8.91448	8.88387	0.000495565	1	7.22261e-05	6.54232e-05
1630519_at	11.4618	11.5781	11.828	11.8101	11.7207	0.000495782	1	7.22731e-05	6.54232e-05
1624583_at	11.7935	11.9262	12.1851	12.1309	12.1417	0.000495927	1	7.23094e-05	6.54232e-05
1630374_at	8.58627	8.615	8.77236	8.82468	8.69449	0.000496702	1	7.25437e-05	6.5513e-05
1632073_at	9.28187	9.32523	9.56014	9.58228	9.51465	0.000496702	1	7.25415e-05	6.5513e-05
1637079_at	8.9836	9.08799	9.35765	9.43275	9.42571	0.000496702	1	7.25015e-05	6.5513e-05
1634048_a_at	10.4769	10.6309	10.9675	10.8141	10.7822	0.000496726	1	7.25783e-05	6.5513e-05
1635810_at	9.12124	9.15032	9.42131	9.42608	9.41699	0.000497261	1	7.27416e-05	6.56002e-05
1638161_at	8.57707	8.653	8.83441	8.87566	8.88732	0.000497291	1	7.27675e-05	6.56002e-05
1630476_s_at	9.74634	9.80132	10.2285	10.2551	10.2945	0.000497423	1	7.28022e-05	6.56002e-05
1629795_at	8.87023	8.88937	9.22868	9.30781	9.32971	0.000497566	1	7.28488e-05	6.56039e-05
1627925_at	9.8617	9.88194	10.194	10.1935	10.0856	0.00049812	1	7.29528e-05	6.56281e-05
1632041_s_at	9.05465	9.15758	9.40838	9.48256	9.478	0.00049812	1	7.29653e-05	6.56281e-05
1625637_at	9.1393	9.21469	9.41433	9.46621	9.43316	0.000498153	1	7.30031e-05	6.56281e-05
1625532_at	9.41872	9.50954	9.92298	9.95357	9.99678	0.000498481	1	7.30794e-05	6.56585e-05
1631739_at	13.5159	13.5496	13.6103	13.5999	13.5419	0.000499093	1	7.31996e-05	6.57283e-05
1623682_a_at	12.5189	12.5032	12.8007	12.8135	12.8241	0.000499768	1	7.33156e-05	6.57942e-05
1640472_at	12.2636	12.2513	12.4718	12.5704	12.5441	0.000499768	1	7.34092e-05	6.58284e-05
1626874_at	9.16219	9.20541	9.65041	9.75093	9.80079	0.000499904	1	7.34567e-05	6.58284e-05
1630157_a_at	9.41716	9.52148	9.80894	9.81139	9.82178	0.000499931	1	7.34885e-05	6.58284e-05
1625233_at	8.83682	8.99908	9.27424	9.30395	9.30362	0.000499945	1	7.3524e-05	6.58284e-05
1635104_s_at	10.2255	10.3062	10.6755	10.7251	10.8111	0.000500023	1	7.35842e-05	6.58441e-05
1627118_at	9.03797	9.09767	9.29614	9.31505	9.29755	0.000500385	1	7.3677e-05	6.5889e-05
1624589_a_at	9.70694	9.8218	10.2691	10.3532	10.4285	0.000500867	1	7.37826e-05	6.59102e-05
1639135_at	10.0726	10.1064	10.3066	10.3683	10.3386	0.000501041	1	7.38236e-05	6.59102e-05
1636868_at	8.9215	8.97246	9.31025	9.4034	9.37153	0.000501074	1	7.38438e-05	6.59102e-05
1625263_at	9.4806	9.56299	9.84161	9.9149	9.92647	0.000501292	1	7.38912e-05	6.59102e-05
1624559_a_at	10.5786	10.7054	11.058	11.0583	10.9976	0.000501588	1	7.39902e-05	6.59102e-05
1630829_at	9.83502	9.91746	10.2467	10.3081	10.2416	0.000501588	1	7.39993e-05	6.59102e-05
1631612_at	8.4226	8.48031	8.61856	8.65354	8.70559	0.000501588	1	7.39647e-05	6.59102e-05
1627360_at	8.95267	8.99085	9.3573	9.33631	9.39719	0.000502331	1	7.41369e-05	6.59284e-05
1625170_at	8.89339	8.97535	9.14477	9.17024	9.18184	0.000502332	1	7.41678e-05	6.59284e-05
1634443_a_at	10.9313	11.034	11.3572	11.3756	11.3571	0.000502332	1	7.41579e-05	6.59284e-05
1637417_at	9.68712	9.76312	10.1329	10.1165	10.1273	0.00050238	1	7.41904e-05	6.59284e-05
1633931_a_at	11.1859	11.2613	11.5305	11.591	11.6273	0.000502487	1	7.42678e-05	6.59593e-05
1625921_at	10.7026	10.8514	11.1322	11.1853	11.0509	0.00050277	1	7.43478e-05	6.59924e-05
1625650_at	11.0127	11.1533	11.3209	11.3229	11.2479	0.000504366	1	7.48169e-05	6.61113e-05
1626138_s_at	9.68416	9.74328	10.0706	10.1045	10.0812	0.000504366	1	7.47567e-05	6.61113e-05
1630358_at	9.32365	9.37578	9.74043	9.79909	9.841	0.000504366	1	7.47545e-05	6.61113e-05
1635361_at	10.8234	10.8962	11.2648	11.2719	11.128	0.000504366	1	7.46877e-05	6.61113e-05
1635980_s_at	10.3213	10.4153	10.6822	10.7159	10.6963	0.000504366	1	7.4663e-05	6.61113e-05
1638131_s_at	8.75128	8.87307	9.18612	9.26433	9.26821	0.000504366	1	7.46301e-05	6.61113e-05
1639384_s_at	9.61033	9.67731	9.79038	9.83756	9.87345	0.000504366	1	7.4824e-05	6.61113e-05
1640119_a_at	9.64907	9.70458	10.0064	10.0571	9.96806	0.000504366	1	7.47641e-05	6.61113e-05
1627619_at	8.70615	8.56917	8.31902	8.29557	8.28001	0.000505142	1	7.49702e-05	6.61444e-05
1640431_at	8.37069	8.31189	8.4929	8.5199	8.54898	0.000505188	1	7.49924e-05	6.61444e-05
1624881_at	9.6418	9.69676	10.0261	10.1136	10.0946	0.00050531	1	7.50261e-05	6.61444e-05
1624109_s_at	10.6581	10.7132	11.043	11.1106	11.2423	0.000505715	1	7.51182e-05	6.61444e-05
1627656_at	8.88367	8.9415	9.20903	9.20275	9.30787	0.000505715	1	7.51328e-05	6.61444e-05
1636557_a_at	9.69201	9.74687	10.0827	10.1466	10.1418	0.000505715	1	7.51729e-05	6.61444e-05
1638189_s_at	8.43006	8.55982	8.8815	8.92911	8.90199	0.000505715	1	7.52014e-05	6.61444e-05
1622932_s_at	9.42229	9.45582	9.80689	9.90453	9.8127	0.000505799	1	7.52694e-05	6.61444e-05
1640015_at	9.21477	9.28159	9.63298	9.66001	9.68535	0.000505799	1	7.52632e-05	6.61444e-05
1625625_at	8.07419	8.17086	8.25684	8.32931	8.34303	0.00050583	1	7.52895e-05	6.61444e-05
1630835_a_at	8.50751	8.57895	8.71375	8.73199	8.72399	0.000505962	1	7.53558e-05	6.61651e-05
1638701_at	10.5439	10.6157	10.906	10.9088	10.8818	0.000506334	1	7.54267e-05	6.61897e-05
1630286_at	9.99714	10.1733	10.4634	10.4861	10.52	0.000506685	1	7.55707e-05	6.62784e-05
1629129_at	8.91028	8.96922	9.25196	9.2957	9.30577	0.000507485	1	7.57227e-05	6.63741e-05
1634390_s_at	12.3621	12.4421	12.6065	12.6116	12.5273	0.00050788	1	7.57972e-05	6.64017e-05
1638803_at	9.05083	9.09921	9.39426	9.42763	9.49357	0.000508092	1	7.58444e-05	6.64054e-05
1640129_at	8.59628	8.57257	8.70744	8.75312	8.76006	0.000508328	1	7.59946e-05	6.64917e-05
1635349_a_at	9.16912	9.21225	9.46392	9.49209	9.50098	0.000508355	1	7.60378e-05	6.64917e-05
1627666_at	8.44159	8.45859	8.68773	8.6724	8.65898	0.000508914	1	7.61444e-05	6.64917e-05
1632644_s_at	10.556	10.5451	10.9229	11.0814	11.0143	0.000508914	1	7.62284e-05	6.64917e-05
1632665_a_at	9.66258	9.72605	9.9254	10.0006	9.98156	0.000508914	1	7.62296e-05	6.64917e-05
1633869_at	9.1873	9.23208	9.45681	9.49369	9.46873	0.000508914	1	7.62441e-05	6.64917e-05
1636822_s_at	10.03	10.1051	10.4226	10.4621	10.4205	0.000508914	1	7.61615e-05	6.64917e-05
1630027_s_at	11.5715	11.6344	11.9548	12.0746	12.1244	0.000509289	1	7.6327e-05	6.64966e-05
1635518_at	8.43225	8.44395	8.75989	8.83922	8.92254	0.000509396	1	7.63742e-05	6.64966e-05
1632496_at	8.6139	8.63386	8.7377	8.71795	8.69218	0.000509475	1	7.6426e-05	6.64966e-05
1627752_s_at	9.22492	9.31029	9.66278	9.80736	9.69382	0.000509545	1	7.65145e-05	6.64966e-05
1628627_at	9.43144	9.51877	9.81541	9.83843	9.88356	0.000509545	1	7.64992e-05	6.64966e-05
1636765_at	8.48346	8.49088	8.58536	8.62877	8.61414	0.000509545	1	7.64662e-05	6.64966e-05
1625543_s_at	9.21375	9.23104	9.55338	9.58412	9.58991	0.000509886	1	7.66371e-05	6.64966e-05
1627043_at	8.48456	8.56609	8.78395	8.84054	8.84049	0.000509886	1	7.65863e-05	6.64966e-05
1635903_at	9.39501	9.47679	9.65655	9.6891	9.69258	0.000509886	1	7.6607e-05	6.64966e-05
1630496_a_at	8.27499	8.27256	8.66056	8.70613	8.81228	0.000510263	1	7.67686e-05	6.65515e-05
1636566_at	8.0026	8.06602	8.2913	8.29313	8.29439	0.000510263	1	7.67925e-05	6.65515e-05
1635960_at	9.01805	9.0885	9.42107	9.48703	9.542	0.000510301	1	7.68295e-05	6.65515e-05
1627060_s_at	11.8435	11.9191	12.1716	12.1164	12.1014	0.000510906	1	7.69854e-05	6.66492e-05
1641160_s_at	9.40167	9.48801	9.66757	9.66444	9.62457	0.000511017	1	7.70491e-05	6.6667e-05
1630399_at	8.67957	8.66564	8.85807	8.9197	8.9573	0.00051127	1	7.71186e-05	6.66898e-05
1640190_at	9.89505	9.95957	10.2723	10.3255	10.2277	0.000511655	1	7.72238e-05	6.67434e-05
1624406_at	10.3416	10.4679	10.6949	10.7391	10.7089	0.000511939	1	7.7298e-05	6.67702e-05
1628032_a_at	8.85698	8.93694	9.3436	9.41357	9.55557	0.000512183	1	7.73663e-05	6.67749e-05
1622903_s_at	9.26811	9.35553	9.50355	9.57266	9.57108	0.000512313	1	7.74106e-05	6.67749e-05
1637578_at	9.22741	9.20532	9.50734	9.5412	9.56801	0.000512313	1	7.74331e-05	6.67749e-05
1634883_at	9.77192	9.89628	9.99991	9.99606	9.9299	0.000512364	1	7.75329e-05	6.67864e-05
1636313_at	8.77748	8.73941	8.61695	8.74467	8.7745	0.000512364	1	7.75027e-05	6.67864e-05
1625218_at	9.0709	9.14584	9.39082	9.42819	9.50875	0.000512871	1	7.76534e-05	6.68207e-05
1629873_at	9.03219	9.00004	8.66535	8.59813	8.59972	0.000512871	1	7.76591e-05	6.68207e-05
1626425_at	9.56565	9.66916	9.85664	9.87062	9.82983	0.000514219	1	7.79285e-05	6.70145e-05
1626239_at	9.48317	9.53991	9.83304	9.8938	9.93036	0.000514306	1	7.79711e-05	6.70145e-05
1638939_at	9.60928	9.67818	10.0187	10.0636	10.1001	0.000515188	1	7.81838e-05	6.71599e-05
1640204_at	10.2224	10.3387	10.6049	10.6691	10.6901	0.000515543	1	7.82851e-05	6.72096e-05
1626018_a_at	9.64345	9.72016	10.0958	10.2258	10.201	0.000517702	1	7.87241e-05	6.74997e-05
1641381_s_at	9.25075	9.3374	9.67386	9.74119	9.76855	0.000517702	1	7.87054e-05	6.74997e-05
1623487_at	8.32413	8.30785	8.58605	8.6655	8.73366	0.000517846	1	7.88414e-05	6.74997e-05
1624854_s_at	10.1959	10.3118	10.6273	10.7233	10.7838	0.000517846	1	7.87912e-05	6.74997e-05
1629705_at	9.65327	9.77185	10.0447	10.1201	10.1083	0.000517846	1	7.88331e-05	6.74997e-05
1633535_at	11.5757	11.6369	11.8577	11.8745	11.892	0.000518185	1	7.89126e-05	6.75232e-05
1637194_at	9.38665	9.47592	9.64649	9.68966	9.67867	0.000518329	1	7.89626e-05	6.75286e-05
1629285_at	9.11505	9.21647	9.48351	9.49111	9.49236	0.000519053	1	7.91047e-05	6.75917e-05
1629062_at	8.78052	8.89902	9.27553	9.31435	9.3883	0.00052014	1	7.93183e-05	6.75917e-05
1625824_at	10.5947	10.6888	11.0214	11.0335	11.0259	0.000520266	1	7.94013e-05	6.75917e-05
1630129_at	10.1847	10.2689	10.6263	10.6458	10.7734	0.000520266	1	7.93863e-05	6.75917e-05
1640822_s_at	9.08497	9.1805	9.46547	9.52082	9.50168	0.000520266	1	7.93563e-05	6.75917e-05
1624756_at	9.91883	9.9795	10.214	10.1649	10.1366	0.0005205	1	7.95008e-05	6.75917e-05
1627431_at	8.82232	8.95545	9.22229	9.27346	9.33476	0.0005205	1	7.94843e-05	6.75917e-05
1632681_at	7.94855	7.97071	8.10729	8.20161	8.21352	0.0005205	1	7.94896e-05	6.75917e-05
1635116_a_at	9.10937	9.09698	9.30572	9.36681	9.37363	0.00052054	1	7.9539e-05	6.75917e-05
1636792_at	8.45342	8.39573	8.25733	8.22912	8.20613	0.00052054	1	7.9524e-05	6.75917e-05
1625113_s_at	8.88529	8.88876	9.02622	9.08337	9.12236	0.000520707	1	7.96055e-05	6.75917e-05
1636064_at	9.24027	9.21749	9.52492	9.60946	9.59604	0.000520707	1	7.95816e-05	6.75917e-05
1637015_s_at	10.0447	10.207	10.4878	10.5315	10.5559	0.000520707	1	7.96124e-05	6.75917e-05
1630987_at	8.44633	8.44813	8.62066	8.63244	8.62025	0.00052084	1	7.96487e-05	6.75917e-05
1640818_at	9.5117	9.59129	9.88187	9.92567	9.94242	0.000521381	1	7.9808e-05	6.76897e-05
1623403_s_at	9.76085	9.81538	10.2391	10.273	10.2419	0.000521484	1	7.98805e-05	6.76995e-05
1627267_at	9.48838	9.5647	9.89394	9.9426	9.99731	0.000521484	1	7.99071e-05	6.76995e-05
1624318_at	9.11977	9.20457	9.50398	9.51571	9.4928	0.000522283	1	8.01256e-05	6.78474e-05
1630341_at	9.33656	9.35052	9.63996	9.69552	9.73978	0.000523347	1	8.03852e-05	6.80089e-05
1638127_s_at	9.88894	9.93131	10.234	10.3308	10.2372	0.000523367	1	8.04044e-05	6.80089e-05
1632267_a_at	11.0473	11.2305	11.45	11.4035	11.3618	0.000523684	1	8.04691e-05	6.80264e-05
1639264_at	8.4533	8.5209	8.77847	8.84872	8.88152	0.00052415	1	8.05568e-05	6.80633e-05
1624396_at	9.21397	9.29665	9.56999	9.6006	9.62732	0.000525263	1	8.07929e-05	6.82149e-05
1631712_at	8.6779	8.71259	9.06766	9.12451	9.1527	0.000525263	1	8.08245e-05	6.82149e-05
1627835_a_at	8.53386	8.59855	8.94308	8.98157	9.09269	0.000525528	1	8.08975e-05	6.82185e-05
1624833_a_at	8.94405	8.99987	9.42165	9.52594	9.50124	0.000525813	1	8.10495e-05	6.82185e-05
1625851_s_at	10.1148	10.1893	10.4322	10.4383	10.4477	0.000525813	1	8.10161e-05	6.82185e-05
1626756_a_at	8.87445	8.95186	9.32203	9.43464	9.45636	0.000525813	1	8.10312e-05	6.82185e-05
1640764_at	9.52114	9.65243	9.97235	10.0521	10.1203	0.000525813	1	8.10145e-05	6.82185e-05
1633320_at	9.22612	9.33807	9.58475	9.59909	9.63812	0.000526217	1	8.1196e-05	6.82818e-05
1633681_at	9.99413	10.0219	10.3836	10.4575	10.4246	0.000526217	1	8.12135e-05	6.82818e-05
1629791_at	9.70387	9.78842	10.1575	10.1819	10.1683	0.000526302	1	8.13119e-05	6.82818e-05
1631831_at	8.65618	8.7306	8.98445	8.99023	8.9795	0.000526302	1	8.13456e-05	6.82818e-05
1636967_a_at	11.7483	11.9178	12.1606	12.1414	12.103	0.000526302	1	8.13346e-05	6.82818e-05
1633714_at	9.28948	9.33445	9.58206	9.60574	9.56976	0.000526836	1	8.14707e-05	6.83497e-05
1629257_s_at	9.03678	9.1185	9.34468	9.39625	9.43383	0.000528162	1	8.17406e-05	6.85389e-05
1640342_at	8.35663	8.40478	8.56357	8.61561	8.66179	0.000528732	1	8.18936e-05	6.86299e-05
1636005_at	8.94842	9.02085	9.24193	9.26511	9.20056	0.000529128	1	8.19829e-05	6.86675e-05
1634904_s_at	9.71545	9.70749	10.0808	10.0904	10.1112	0.000529431	1	8.20668e-05	6.87006e-05
1640237_a_at	9.20712	9.2818	9.4441	9.50211	9.52655	0.000530318	1	8.22694e-05	6.88329e-05
1634307_at	9.97967	10.1098	10.4296	10.4923	10.4742	0.000531057	1	8.24329e-05	6.89324e-05
1624199_at	8.849	8.91338	9.25271	9.13365	9.13163	0.000531214	1	8.25198e-05	6.89677e-05
1637386_at	10.6157	10.7563	11.0469	11.0957	11.0285	0.000532294	1	8.27392e-05	6.91137e-05
1630911_s_at	10.3867	10.4075	10.6862	10.7752	10.7488	0.000532731	1	8.2885e-05	6.91981e-05
1624531_s_at	9.84115	9.96159	10.201	10.3128	10.3098	0.000533025	1	8.29837e-05	6.92431e-05
1624029_at	8.55708	8.63491	8.8321	8.86162	8.85833	0.000534452	1	8.32713e-05	6.94297e-05
1634150_s_at	9.50417	9.58811	9.90073	9.88566	9.93478	0.000534543	1	8.33184e-05	6.94297e-05
1628814_s_at	11.8572	11.9783	12.2018	12.24	12.1884	0.00053459	1	8.33421e-05	6.94297e-05
1626839_s_at	9.25116	9.35566	9.66097	9.71977	9.73515	0.00053502	1	8.34255e-05	6.94617e-05
1627595_at	12.5481	12.7098	12.8435	12.7697	12.7111	0.000536351	1	8.36793e-05	6.96088e-05
1636025_at	10.1014	10.175	10.4868	10.4721	10.5261	0.000536351	1	8.36923e-05	6.96088e-05
1630968_at	9.05211	9.09406	9.52454	9.5734	9.67946	0.000536604	1	8.37643e-05	6.96285e-05
1636884_s_at	9.37729	9.42785	9.78698	9.78094	9.85645	0.00053672	1	8.3806e-05	6.96285e-05
1630195_at	8.08654	8.10924	8.28357	8.30838	8.265	0.00053837	1	8.42177e-05	6.99319e-05
1640747_s_at	10.6751	10.7339	11.0238	11.0432	11.1105	0.00053837	1	8.42617e-05	6.99319e-05
1630733_s_at	9.54351	9.53563	9.73643	9.75179	9.75248	0.000538615	1	8.43587e-05	6.99369e-05
1634652_a_at	9.31918	9.41685	9.54008	9.57294	9.53523	0.000538615	1	8.43375e-05	6.99369e-05
1639024_at	8.33895	8.33681	8.49787	8.50416	8.54688	0.000538977	1	8.44521e-05	6.99369e-05
1630711_at	8.04896	8.12972	8.32402	8.38057	8.35696	0.000539058	1	8.44852e-05	6.99369e-05
1622996_at	8.76573	8.8463	9.03953	9.06972	9.02568	0.000539181	1	8.45816e-05	6.99369e-05
1635578_at	8.37347	8.42551	8.23517	8.2038	8.21571	0.000539181	1	8.45845e-05	6.99369e-05
1640962_s_at	9.47912	9.51614	9.84467	9.89719	9.8976	0.000539181	1	8.45569e-05	6.99369e-05
1634377_at	8.77581	8.83539	9.19582	9.23942	9.24583	0.000540147	1	8.47884e-05	7.00611e-05
1637466_at	10.8267	10.9946	11.2144	11.3558	11.3018	0.000540491	1	8.48589e-05	7.00611e-05
1636199_at	8.08636	8.15325	8.43756	8.5119	8.58406	0.000540527	1	8.49061e-05	7.00611e-05
1638844_s_at	9.53577	9.60194	9.94286	9.96465	9.89187	0.000540527	1	8.49161e-05	7.00611e-05
1627996_a_at	9.14583	9.16993	9.58035	9.61892	9.6611	0.000540814	1	8.50589e-05	7.01041e-05
1634386_s_at	10.8126	10.869	11.1126	11.1397	11.0816	0.000540814	1	8.50453e-05	7.01041e-05
1633382_s_at	9.35054	9.40293	9.69749	9.74975	9.77143	0.00054106	1	8.51143e-05	7.01123e-05
1641673_at	8.64691	8.72813	8.94883	8.98081	8.97795	0.000542132	1	8.53827e-05	7.02561e-05
1630173_a_at	8.7211	8.84397	9.19409	9.20855	9.22667	0.000542191	1	8.54199e-05	7.02561e-05
1633081_at	9.42777	9.5064	9.80871	9.87121	9.98473	0.000542191	1	8.54252e-05	7.02561e-05
1632332_at	8.95606	9.02584	9.22275	9.26735	9.25974	0.000543072	1	8.56141e-05	7.02744e-05
1635659_at	9.21285	9.26591	9.40488	9.44023	9.45309	0.000543282	1	8.56804e-05	7.02744e-05
1622902_at	11.2388	11.3145	11.5403	11.5602	11.3616	0.000543313	1	8.5756e-05	7.02744e-05
1641124_at	9.68485	9.8127	10.0643	10.0341	10.0082	0.000543313	1	8.57369e-05	7.02744e-05
1623011_at	8.2981	8.19117	8.14777	8.12335	8.10894	0.000543596	1	8.58592e-05	7.02744e-05
1631573_a_at	9.25096	9.28413	9.70937	9.70115	9.67548	0.000543596	1	8.58634e-05	7.02744e-05
1635448_at	9.93392	10.0669	10.1836	10.2343	10.1582	0.000543596	1	8.58595e-05	7.02744e-05
1638906_at	8.8842	8.96528	9.30671	9.38794	9.40088	0.00054375	1	8.59045e-05	7.02744e-05
1630036_at	9.18537	9.29752	9.47724	9.5431	9.55068	0.000543866	1	8.59551e-05	7.02744e-05
1633894_a_at	8.65661	8.65929	8.9764	9.03534	8.96684	0.000543866	1	8.59727e-05	7.02744e-05
1633335_at	8.77925	8.91739	9.23661	9.28534	9.34974	0.000544018	1	8.60435e-05	7.02744e-05
1639341_at	9.14945	9.2055	9.42764	9.52218	9.55768	0.000544018	1	8.60178e-05	7.02744e-05
1632557_s_at	8.91035	9.01209	9.30119	9.36643	9.37353	0.000544282	1	8.6122e-05	7.02744e-05
1627394_s_at	9.25516	9.341	9.69708	9.72537	9.74947	0.0005443	1	8.61751e-05	7.02744e-05
1628146_at	9.89935	9.96094	10.1962	10.2281	10.1931	0.0005443	1	8.61678e-05	7.02744e-05
1633100_a_at	10.4303	10.4807	10.8854	10.9596	10.9714	0.0005443	1	8.61454e-05	7.02744e-05
1626323_s_at	8.93055	9.02397	9.33829	9.43731	9.42941	0.000544357	1	8.62377e-05	7.02791e-05
1640066_at	8.74434	8.77071	8.88653	9.00208	8.97464	0.000544384	1	8.62718e-05	7.02791e-05
1631696_s_at	9.06291	9.18025	9.27553	9.30194	9.33452	0.00054554	1	8.64717e-05	7.04048e-05
1635876_at	8.99115	8.98179	8.64995	8.59368	8.5897	0.000545991	1	8.656e-05	7.04396e-05
1635718_at	9.39651	9.42878	9.66851	9.68615	9.66781	0.000546306	1	8.66682e-05	7.04854e-05
1630992_at	9.36468	9.39496	9.60871	9.6521	9.68876	0.000546463	1	8.67186e-05	7.04854e-05
1638828_a_at	10.0255	10.0671	10.3826	10.4427	10.3963	0.000546574	1	8.67531e-05	7.04854e-05
1625833_at	9.18676	9.22727	9.60765	9.63615	9.68572	0.000548117	1	8.72502e-05	7.07034e-05
1627930_s_at	11.2346	11.3632	11.5339	11.4991	11.4998	0.000548117	1	8.72468e-05	7.07034e-05
1628628_at	8.70839	8.79389	9.0726	9.09223	9.14327	0.000548117	1	8.72226e-05	7.07034e-05
1628888_at	9.45015	9.5469	9.93509	9.96907	10.0606	0.000548117	1	8.72092e-05	7.07034e-05
1630094_at	8.77965	8.88586	9.14637	9.20057	9.19464	0.000548117	1	8.71303e-05	7.07034e-05
1639657_at	8.30218	8.29825	8.1291	8.14802	8.10922	0.000548855	1	8.74013e-05	7.07806e-05
1632197_at	10.3541	10.4604	10.739	10.7372	10.6405	0.000548974	1	8.7437e-05	7.07806e-05
1625242_at	8.54519	8.57201	8.83221	8.89823	8.85345	0.000549566	1	8.75819e-05	7.08607e-05
1631137_at	10.2428	10.3185	10.486	10.5119	10.4425	0.000549934	1	8.76911e-05	7.0912e-05
1626842_a_at	8.61067	8.71221	9.04739	9.13745	9.10313	0.000551875	1	8.81361e-05	7.12345e-05
1637853_a_at	9.93887	9.95415	10.1589	10.3128	10.237	0.000552546	1	8.82942e-05	7.13121e-05
1635035_at	9.33158	9.40569	9.75134	9.83657	9.88561	0.000552599	1	8.83698e-05	7.13121e-05
1639251_at	8.69781	8.6427	8.35253	8.28742	8.30926	0.000552599	1	8.83705e-05	7.13121e-05
1640454_at	10.284	10.2868	10.5909	10.6031	10.6297	0.000552876	1	8.84316e-05	7.13241e-05
1635354_at	8.322	8.23525	8.10195	8.04754	8.03891	0.000553444	1	8.87262e-05	7.15009e-05
1638162_s_at	8.81861	8.92907	9.19484	9.27743	9.26551	0.000553444	1	8.87433e-05	7.15009e-05
1639955_at	8.94716	9.0321	9.23821	9.29316	9.28928	0.00055358	1	8.8833e-05	7.15359e-05
1636052_at	8.79199	8.81785	9.06668	9.10167	9.09918	0.000554092	1	8.89321e-05	7.15784e-05
1627742_at	8.54168	8.5939	8.85277	8.96778	8.98466	0.000555295	1	8.92103e-05	7.16608e-05
1636806_at	9.05904	9.10596	9.14903	9.20201	9.15693	0.000555295	1	8.9188e-05	7.16608e-05
1623235_at	8.86499	8.9099	9.1684	9.2259	9.24142	0.000555912	1	8.93266e-05	7.16608e-05
1626263_at	9.50174	9.55125	9.93698	9.96918	9.93095	0.000556109	1	8.93752e-05	7.16608e-05
1632721_at	8.78438	8.83288	8.90784	8.9186	8.95468	0.00055612	1	8.94111e-05	7.16608e-05
1638436_at	9.26393	9.27195	9.61683	9.61101	9.5673	0.00055612	1	8.94017e-05	7.16608e-05
1627453_s_at	10.2497	10.3207	10.5646	10.6336	10.585	0.000556259	1	8.94676e-05	7.16608e-05
1625814_at	9.51026	9.5069	9.74881	9.8121	9.82238	0.000556302	1	8.95086e-05	7.16608e-05
1632634_at	9.3489	9.43459	9.66133	9.67592	9.67398	0.00055671	1	8.95914e-05	7.16608e-05
1624113_at	8.80527	8.82036	9.05605	9.08238	9.08896	0.000557112	1	8.97064e-05	7.16608e-05
1636123_at	9.53345	9.64295	9.78873	9.84776	9.77725	0.000557112	1	8.97018e-05	7.16608e-05
1638919_at	8.55397	8.59376	8.74941	8.79359	8.76654	0.000557112	1	8.97074e-05	7.16608e-05
1626725_at	9.68339	9.7475	9.82965	9.78611	9.75665	0.000557238	1	8.97619e-05	7.16608e-05
1628049_at	11.2491	11.3349	11.6479	11.6051	11.514	0.000557268	1	8.98139e-05	7.16608e-05
1628306_at	9.81713	9.86844	10.1644	10.1911	10.2151	0.000557268	1	8.98107e-05	7.16608e-05
1630477_at	8.47232	8.61406	8.96277	8.99747	9.1299	0.000557268	1	8.98614e-05	7.16608e-05
1631051_at	8.54318	8.57579	8.72818	8.75829	8.77018	0.000557268	1	8.98461e-05	7.16608e-05
1631595_at	9.95151	10.122	10.3161	10.2997	10.1956	0.000557268	1	8.98692e-05	7.16608e-05
1624577_at	9.74743	9.7767	9.95123	10.0922	10.254	0.000557762	1	8.99661e-05	7.16696e-05
1640534_s_at	9.35306	9.28469	9.90991	9.97542	9.99769	0.000558004	1	9.00221e-05	7.16696e-05
1633516_at	9.14851	9.06813	8.78592	8.71449	8.7251	0.000558062	1	9.00539e-05	7.16696e-05
1633964_at	9.04817	9.11195	9.51354	9.52669	9.65323	0.000558062	1	9.00657e-05	7.16696e-05
1624122_a_at	9.37322	9.39025	9.85595	9.91402	9.98432	0.000559641	1	9.04237e-05	7.19174e-05
1639259_at	9.1804	9.24858	9.42846	9.43581	9.47279	0.000560918	1	9.07106e-05	7.21085e-05
1638770_a_at	9.1002	9.12803	9.51236	9.56725	9.60138	0.000561816	1	9.08957e-05	7.21446e-05
1635007_at	9.13276	9.23005	9.58748	9.6236	9.68247	0.000562131	1	9.09639e-05	7.21446e-05
1627590_at	12.2729	12.3486	12.5602	12.5275	12.5246	0.000562408	1	9.10706e-05	7.21446e-05
1632570_at	9.29403	9.36123	9.60773	9.6753	9.66441	0.000562408	1	9.10974e-05	7.21446e-05
1634934_at	9.17865	9.22302	9.49483	9.50541	9.53992	0.000562408	1	9.1128e-05	7.21446e-05
1635079_at	9.08259	9.18108	9.40262	9.42005	9.42331	0.000562408	1	9.11295e-05	7.21446e-05
1637892_at	8.6137	8.6381	8.85785	8.87473	8.88652	0.000562408	1	9.10912e-05	7.21446e-05
1639909_at	8.60732	8.68329	9.05766	9.10107	9.14777	0.000562408	1	9.1116e-05	7.21446e-05
1623326_a_at	10.7139	10.8382	11.0745	11.0698	11.0846	0.000562857	1	9.12541e-05	7.22062e-05
1625431_at	9.92977	9.93869	10.2519	10.2582	10.2869	0.000563267	1	9.13551e-05	7.22151e-05
1627640_at	9.7387	9.80677	9.95722	9.9568	9.95185	0.000563806	1	9.16501e-05	7.22151e-05
1628749_at	8.74805	8.71291	8.57896	8.49547	8.49813	0.000563806	1	9.16289e-05	7.22151e-05
1633046_at	8.88887	8.91217	9.01278	9.01937	9.02227	0.000563806	1	9.15755e-05	7.22151e-05
1638143_a_at	9.19843	9.31413	9.53034	9.57531	9.57481	0.000563806	1	9.15867e-05	7.22151e-05
1638455_at	8.27493	8.22308	8.08772	8.05914	8.07562	0.000563806	1	9.16341e-05	7.22151e-05
1639245_x_at	9.8099	9.87482	9.97002	10.0512	10.0901	0.000563806	1	9.16402e-05	7.22151e-05
1630201_a_at	9.23897	9.26746	9.48393	9.46611	9.46504	0.000564046	1	9.17237e-05	7.22151e-05
1623043_s_at	9.69211	9.79351	10.0727	10.1082	10.1534	0.000564141	1	9.19922e-05	7.22423e-05
1624614_at	8.86489	8.90309	9.1004	9.14787	9.11562	0.000564141	1	9.17889e-05	7.22151e-05
1625819_at	9.27638	9.37596	9.75857	9.86594	9.86343	0.000564141	1	9.20013e-05	7.22423e-05
1635182_at	9.47868	9.48209	9.73739	9.77691	9.84344	0.000564141	1	9.1959e-05	7.22423e-05
1635258_s_at	9.29995	9.38637	9.67489	9.81808	9.86163	0.000564141	1	9.18167e-05	7.22151e-05
1635803_s_at	8.30829	8.35801	8.68976	8.73312	8.77321	0.000564141	1	9.20506e-05	7.22423e-05
1640891_at	9.23936	9.15477	8.8783	8.8623	8.79061	0.000564141	1	9.18245e-05	7.22151e-05
1641303_at	9.50632	9.66979	9.91311	9.93464	9.9856	0.000564141	1	9.1826e-05	7.22151e-05
1626369_at	10.6256	10.706	10.9796	11.0703	10.9395	0.000564303	1	9.20944e-05	7.22423e-05
1638345_at	8.80166	8.87959	9.33363	9.39037	9.47597	0.000564511	1	9.21457e-05	7.22459e-05
1625072_s_at	9.36313	9.47122	9.80698	9.86844	9.93049	0.00056501	1	9.22444e-05	7.22866e-05
1633556_s_at	9.37173	9.50459	9.89879	9.93206	10.0052	0.000565394	1	9.24285e-05	7.23575e-05
1636789_s_at	9.52975	9.58656	10.023	10.001	10.0533	0.000565394	1	9.23744e-05	7.23518e-05
1641424_at	8.67861	8.73549	8.98112	9.01753	9.00944	0.000566729	1	9.2699e-05	7.25325e-05
1631100_at	8.29178	8.30136	8.5179	8.57011	8.56154	0.000567318	1	9.28126e-05	7.25846e-05
1641603_s_at	9.691	9.74075	10.0288	10.0518	10.0666	0.000567494	1	9.28763e-05	7.25977e-05
1639186_at	8.48665	8.58313	8.85605	8.91822	8.95367	0.000567906	1	9.29611e-05	7.26272e-05
1636990_at	8.71854	8.77728	8.99312	9.04035	9.08422	0.00056833	1	9.30828e-05	7.26489e-05
1640842_at	9.6693	9.83721	10.045	10.0523	10.0342	0.00056833	1	9.30771e-05	7.26489e-05
1628973_a_at	9.14527	9.21348	9.31961	9.34748	9.31346	0.000568846	1	9.32023e-05	7.27054e-05
1639773_s_at	12.4715	12.5528	12.7898	12.7933	12.7608	0.000569372	1	9.33409e-05	7.27264e-05
1630531_at	9.18423	9.22973	9.56032	9.66805	9.72102	0.000569461	1	9.33728e-05	7.27264e-05
1630596_at	8.74214	8.79492	9.03343	8.98154	9.01436	0.000569497	1	9.33963e-05	7.27264e-05
1632188_at	10.8442	10.999	11.2365	11.2977	11.2983	0.000569519	1	9.34174e-05	7.27264e-05
1630573_at	9.28266	9.2714	9.37563	9.45235	9.44414	0.000569799	1	9.34982e-05	7.27526e-05
1624766_s_at	9.52797	9.52745	9.84943	9.92988	9.87575	0.00057029	1	9.36838e-05	7.27871e-05
1627773_a_at	11.5275	11.6375	11.8364	11.8747	11.8544	0.00057029	1	9.36355e-05	7.27871e-05
1633005_at	9.46089	9.53413	9.73024	9.72881	9.74574	0.00057029	1	9.36635e-05	7.27871e-05
1630938_a_at	8.10052	8.14667	8.28696	8.34809	8.37506	0.000570605	1	9.37798e-05	7.28089e-05
1640619_at	9.20423	9.24848	9.51431	9.57372	9.55457	0.000570609	1	9.38061e-05	7.28089e-05
1638830_at	9.92774	10.0368	10.2803	10.3442	10.3168	0.000571427	1	9.39932e-05	7.29175e-05
1630079_at	8.38808	8.37697	8.58786	8.61083	8.65326	0.000572388	1	9.42459e-05	7.30216e-05
1630841_at	8.86527	8.9336	9.24936	9.30597	9.33274	0.000572388	1	9.41745e-05	7.30215e-05
1629280_at	8.90675	9.02664	9.42271	9.48105	9.54691	0.000572447	1	9.42988e-05	7.30216e-05
1639309_at	9.44939	9.52913	9.89219	9.85545	9.85291	0.000572447	1	9.43164e-05	7.30216e-05
1626358_at	8.59376	8.65033	8.78304	8.82866	8.76406	0.000573831	1	9.47641e-05	7.32672e-05
1626570_s_at	9.77787	9.76842	9.90529	9.99991	9.95052	0.000573831	1	9.47759e-05	7.32672e-05
1634291_at	9.37396	9.40613	9.64763	9.65116	9.58658	0.000573831	1	9.47501e-05	7.32672e-05
[truncated: 8,867 more rows]

## Sheet: By_Expression
GENE	ON (F1)	OFF (P1)	Ratio	Exp_FDR	Exp_Bonferoni	Exp_p_value	Q-value	Drosophila	Dro Symb	Human	F1 signal	P1 signal	Fold (F1/P1)
1625382_at	10.7343	7.85484	2.87949	0	0	2.03481e-19	5.4081e-17	Osiris	Osi6	.	1703.56	231.496	7.35892
1625697_at	10.8641	8.43565	2.42842	0	0	1.45987e-22	1.17086e-19	CYP6-like	Cyp6g1	CYP3A4	1863.85	346.244	5.38304
1639323_at	12.37	10.1517	2.2183	1.03922e-06	0.000270096	8.35255e-09	7.81984e-08	Turandot C	TotC	.	5293.5	1137.55	4.65344
1635549_at	13.1825	11.0987	2.08387	2.9177e-06	0.00104302	3.23537e-08	2.21477e-07	Turandot	TotA	.	9296.99	2192.98	4.23944
1628699_at	10.9439	8.87756	2.06634	1.12415e-07	1.54481e-05	4.75896e-10	8.29746e-09	Larval serum protein 1 beta	Lsp1beta	.	1969.89	470.338	4.18824
1626028_at	11.2865	9.2899	1.99662	4.82547e-12	1.4464e-10	4.53961e-15	3.64091e-13	CG4783	CG4783	.	2497.93	625.948	3.99064
1626586_at	9.93564	8.27171	1.66393	0	0	4.44446e-22	2.67344e-19	Odorant-binding protein 57a	Obp57a	.	979.325	309.054	3.16879
1625164_at	10.8377	9.19695	1.6408	9.03382e-09	7.29944e-07	2.24475e-11	6.66799e-10	Turandot X	TotX	.	1830.15	586.891	3.11838
1638279_at	10.0571	8.47237	1.58478	0	0	3.88092e-17	6.22523e-15	CG13840	CG13840	.	1065.38	355.171	2.99962
1627632_at	10.6386	9.06468	1.57388	1.31604e-11	4.33866e-10	1.33801e-14	9.75568e-13	CG17777	CG17777	.	1594.14	535.477	2.97704
1640642_at	11.4313	9.89732	1.53401	0	0	2.3888e-20	9.57945e-18	rhodopsin	Rh6	.	2761.68	953.65	2.8959
1640666_at	10.9741	9.44164	1.53248	6.2941e-13	1.44684e-11	2.89541e-16	3.43392e-14	CG31205	CG31205	.	2011.59	695.373	2.89282
1633471_at	9.98691	8.49573	1.49118	4.53855e-11	1.67741e-09	5.13082e-14	3.33655e-12	Peroxiredoxin 2540	Prx2540-2	.	1014.75	360.969	2.81118
1624824_at	9.89858	8.48272	1.41586	3.53054e-06	0.00132601	4.11561e-08	2.68361e-07	Jonah 74E	Jon74E	OVCH1	954.489	357.729	2.66819
1632731_at	9.97105	8.58655	1.3845	0	0	1.41716e-22	1.17086e-19	CG8613	CG8613	SPATA20	1003.66	384.423	2.61081
1640458_at	12.0586	10.6782	1.38046	6.2941e-13	1.44684e-11	3.89679e-16	4.10662e-14	CG11211	CG11211	.	4265.83	1638.49	2.60351
1626319_a_at	10.0965	8.76962	1.32687	0	0	7.26019e-20	2.49553e-17	Immune induced molecule 10	IM10	.	1094.82	436.433	2.50857
1634786_at	10.1418	8.82144	1.32036	1.38974e-10	6.24537e-09	1.91856e-13	1.02583e-11	Lectin28C	lectin-28C	.	1129.76	452.396	2.49729
1623675_at	12.3786	11.0674	1.31118	0.00343339	1	0.00141115	0.000907119	turn on sex-specificity	Obp99b	.	5325.13	2145.99	2.48144
1626536_at	10.3108	9.06999	1.24082	0	0	2.83565e-23	6.82283e-20	CG6776	CG6776	.	1270.17	537.45	2.36333
1623635_at	10.8588	9.62172	1.23707	0.000984392	1	0.000240696	0.000220455	Turandot M	TotM	.	1857.04	787.82	2.35719
1628806_at	12.3829	11.1828	1.20017	0	0	2.14561e-16	2.94186e-14	Rhodopsin5	Rh5	.	5341.19	2324.62	2.29766
1622946_at	10.2718	9.07289	1.19892	0	0	4.78825e-18	1.04736e-15	CG6908	CG6908	.	1236.3	538.534	2.29567
1637129_at	10.065	8.92272	1.14228	0	0	5.23298e-18	1.04925e-15	Glutathione S transferase E3	GstE3	.	1071.19	485.297	2.20729
1626086_at	10.8769	9.74332	1.13362	0.000299008	0.821565	2.77837e-05	4.07623e-05	selenocysteine methyltransferase	CG10621	.	1880.54	857.098	2.19408
1627785_at	9.97171	8.86335	1.10836	0	0	2.20081e-16	2.94186e-14	tetraspanin 42E	Tsp42En	.	1004.12	465.73	2.156
1631497_at	9.45439	8.36954	1.08485	0	0	1.01104e-16	1.52041e-14	tetraspanin 42E	Tsp42Eo	.	701.546	330.737	2.12116
1626088_at	9.34129	8.26404	1.07724	0	0	1.23522e-20	5.9441e-18	CG2177	CG2177	SLC39A9	648.645	307.414	2.11
1636311_at	12.4776	11.4053	1.07232	7.60271e-10	4.25033e-08	1.30616e-12	5.61204e-11	5' gene	Gpdh	GPD1	5703.46	2712.3	2.10281
1632437_at	9.55722	8.48524	1.07198	8.86511e-06	0.00420993	1.31081e-07	6.82669e-07	CG31846	CG31846	.	753.373	358.353	2.10232
1625744_at	10.6091	9.5489	1.06017	4.82547e-12	1.4464e-10	4.34477e-15	3.6048e-13	Glutathione S transferase E6	GstE6	.	1561.88	749.04	2.08517
1634525_at	11.821	10.7946	1.0264	2.52474e-07	4.24482e-05	1.30892e-09	1.89722e-08	CG7738	CG7738	.	3618.06	1776.23	2.03693
1624819_s_at	9.45133	8.42991	1.02142	1.14939e-08	9.63032e-07	2.96182e-11	8.48382e-10	---	---	.	700.06	344.87	2.02992
1640775_a_at	10.5356	9.52265	1.01294	3.30855e-06	0.00122001	3.78579e-08	2.50935e-07	NAD-dependent methylenetetrahydrofolate dehydrogenase	Nmdmc	MTHFD2	1484.32	735.536	2.01802
1624393_at	9.66186	8.65739	1.00446	0	0	2.08499e-19	5.4081e-17	white	w	.	810.043	403.771	2.00619
1623521_at	10.9559	9.95911	0.996744	0.00137143	1	0.000400012	0.000326813	CG11909	CG11909	KIAA1161	1986.28	995.385	1.99549
1624101_at	10.181	9.19316	0.98785	1.65445e-11	5.78453e-10	1.77307e-14	1.21891e-12				1160.89	585.353	1.98323
1639306_s_at	10.6137	9.64503	0.968703	1.09645e-05	0.00564263	1.75914e-07	8.48227e-07				1566.94	800.652	1.95708
1634271_at	9.58418	8.62125	0.962935	0	0	1.73586e-17	2.98331e-15				767.584	393.78	1.94927
1624057_at	11.022	10.0597	0.962318	1.36719e-09	8.32452e-08	2.55831e-12	1.0091e-10				2079.48	1067.25	1.94844
1641634_at	13.0786	12.1376	0.940908	0.0279192	1	0.0170815	0.00725884				8650.43	4506.05	1.91974
1641481_at	9.56206	8.64069	0.921369	1.5328e-11	5.20624e-10	1.60932e-14	1.13887e-12				755.906	399.124	1.89391
1625949_at	10.5273	9.61294	0.914353	9.21754e-08	1.19052e-05	3.66652e-10	6.80356e-09				1475.81	783.038	1.88472
1637322_at	9.71259	8.80875	0.90384	3.5687e-06	0.00135079	4.19293e-08	2.71198e-07				839.039	448.435	1.87104
1629184_at	10.6395	9.74659	0.892864	0.000169884	0.303829	9.89663e-06	1.80944e-05				1595.13	859.047	1.85686
1627499_at	11.4476	10.565	0.882642	5.3869e-10	2.7968e-08	8.59165e-13	3.97544e-11				2793.02	1514.86	1.84375
1639694_s_at	9.48158	8.60407	0.877512	2.38583e-05	0.0162285	5.08667e-07	1.89458e-06				714.891	389.119	1.8372
1640906_at	11.604	10.7395	0.86449	1.78752e-10	8.21126e-09	2.52389e-13	1.32015e-11				3112.84	1709.7	1.8207
1636764_at	10.3544	9.49106	0.863292	0.000110318	0.148394	4.75714e-06	1.03327e-05				1309.1	719.606	1.81919
1635072_at	10.3452	9.48825	0.856978	0.0117177	1	0.00626325	0.00312201				1300.84	718.205	1.81124
1639424_at	10.2108	9.35905	0.851784	2.9177e-06	0.00103732	3.2175e-08	2.21477e-07				1185.14	656.683	1.80473
1632117_s_at	11.9255	11.0773	0.848144	0.000106936	0.140251	4.49092e-06	9.93158e-06				3889.78	2160.77	1.80018
1623448_at	10.3599	9.54306	0.816886	1.60849e-12	4.33946e-11	1.44293e-15	1.28586e-13				1314.18	746.016	1.7616
1627287_at	9.74576	8.93981	0.805954	6.00427e-05	0.0594979	1.88428e-06	5.05999e-06				858.552	491.078	1.7483
1631628_s_at	11.0922	10.3005	0.791765	9.41806e-05	0.114174	3.64322e-06	8.45315e-06				2183.18	1261.09	1.73119
1623699_a_at	9.58562	8.79644	0.789176	0.000116436	0.162758	5.22732e-06	1.10814e-05				768.349	444.624	1.72809
1630614_s_at	9.12274	8.34394	0.778801	0	0	2.24767e-19	5.4081e-17				557.466	324.92	1.7157
1626309_at	12.7491	11.9712	0.777897	1.14628e-06	0.000303559	9.38879e-09	8.62225e-08				6884.46	4015.13	1.71463
1629569_at	9.45279	8.69269	0.760103	1.16327e-09	6.85106e-08	2.10539e-12	8.58603e-11				700.768	413.772	1.69361
1627019_s_at	9.24934	8.52027	0.729064	0.000108844	0.144127	4.61693e-06	1.01538e-05				608.594	367.162	1.65756
1627784_at	9.8478	9.1204	0.727396	3.32119e-06	0.00123414	3.82987e-08	2.52508e-07				921.472	556.563	1.65565
1641114_at	8.94474	8.21809	0.726648	2.36896e-06	0.000797041	2.47068e-08	1.79068e-07				492.759	297.778	1.65479
1641722_at	10.5392	9.81313	0.726054	1.82112e-05	0.0110064	3.44134e-07	1.42516e-06				1488.03	899.595	1.65411
1641365_s_at	10.1793	9.45618	0.723118	2.24828e-08	2.085e-06	6.41421e-11	1.65948e-09				1159.51	702.417	1.65075
1635766_at	9.28748	8.56634	0.721147	7.51407e-08	8.83478e-06	2.71998e-10	5.5462e-09				624.9	379.074	1.64849
1627636_at	9.83445	9.11462	0.719833	1.11357e-12	2.89324e-11	1.04894e-15	9.79575e-14				912.99	554.338	1.64699
1627119_at	13.0134	12.2949	0.718515	3.87771e-08	3.94301e-06	1.21334e-10	2.86216e-09				8268.32	5024.84	1.64549
1631120_at	9.04558	8.32831	0.717276	1.07344e-05	0.00550342	1.71564e-07	8.30581e-07				528.435	321.418	1.64407
1628757_at	8.82178	8.10849	0.713297	1.11357e-12	2.89324e-11	1.05852e-15	9.79575e-14				452.503	275.993	1.63955
1627796_s_at	9.16415	8.45864	0.705514	7.24795e-05	0.0774838	2.46019e-06	6.24706e-06				573.701	351.807	1.63073
1633109_at	9.73001	9.02879	0.701224	0.0013364	1	0.000385406	0.000317794				849.231	522.32	1.62588
1623376_s_at	11.5351	10.8345	0.700538	8.41968e-08	1.0401e-05	3.20278e-10	6.21466e-09				2967.54	1826.06	1.62511
1624732_at	8.94879	8.25287	0.695913	6.2941e-13	1.44684e-11	2.99707e-16	3.43392e-14				494.144	305.044	1.61991
1636615_at	9.53155	8.83676	0.69479	0.000111323	0.151198	4.84934e-06	1.04645e-05				740.084	457.224	1.61865
1616608_a_at	12.6342	11.9455	0.688761	1.57346e-07	2.34941e-05	7.2403e-10	1.16918e-08				6357.48	3944.09	1.6119
1623944_at	9.75716	9.06893	0.688236	7.39188e-06	0.0033452	1.04082e-07	5.6787e-07				865.365	537.056	1.61131
1636059_at	9.63501	8.94827	0.686742	6.58541e-10	3.4847e-08	1.07077e-12	4.86108e-11				795.108	493.965	1.60964
1634773_at	10.6682	9.98297	0.685261	0.000173064	0.3115	1.01509e-05	1.8489e-05				1627.27	1011.99	1.60799
1634512_at	9.80028	9.1182	0.682072	3.83887e-06	0.0015205	4.72234e-08	2.92092e-07				891.614	555.716	1.60444
1623540_at	9.62631	8.95165	0.674654	7.18459e-10	3.87337e-08	1.19e-12	5.30231e-11				790.328	495.127	1.59621
1633796_at	10.3918	9.71999	0.671806	0.0218797	1	0.0129239	0.00573622				1343.51	843.349	1.59307
1625401_at	9.68143	9.0123	0.669135	8.88221e-06	0.00423206	1.31774e-07	6.83864e-07				821.109	516.382	1.59012
1627912_at	10.6292	9.96056	0.668589	1.64958e-06	0.000487096	1.50799e-08	1.24259e-07				1583.77	996.387	1.58952
1640898_at	10.6745	10.0062	0.668368	1.76084e-07	2.68965e-05	8.28963e-10	1.30819e-08				1634.38	1028.38	1.58927
1640774_a_at	11.3935	10.7326	0.660916	4.93993e-06	0.00207241	6.44106e-08	3.77011e-07				2690.3	1701.55	1.58109
1628369_at	10.4413	9.78206	0.659253	5.4565e-11	2.12555e-09	6.52242e-14	4.02398e-12				1390.43	880.425	1.57927
1623769_at	11.3497	10.6905	0.659208	0.000536351	1	8.3699e-05	9.64499e-05				2609.71	1652.54	1.57922
1641539_a_at	10.7596	10.1028	0.656818	6.56315e-08	7.58639e-06	2.33549e-10	4.84431e-09				1733.65	1099.61	1.5766
1638583_at	9.50997	8.85341	0.656562	2.44169e-09	1.6083e-07	4.94369e-12	1.80227e-10				729.099	462.532	1.57632
1637378_s_at	12.4279	11.7772	0.650758	0.000299639	0.824304	2.78801e-05	4.08769e-05				5510.3	3509.76	1.56999
1629559_s_at	9.58123	8.93459	0.646645	1.04866e-10	4.29422e-09	1.32111e-13	7.75296e-12				766.016	489.303	1.56552
1634794_at	10.4102	9.76907	0.641136	0.00178888	1	0.000590695	0.000445259				1360.77	872.535	1.55956
1640599_at	12.0661	11.4301	0.635956	0.00115253	1	0.000308285	0.00026674				4287.91	2759.33	1.55397
1632830_s_at	10.8761	10.2418	0.634266	0.000510769	1	7.69177e-05	9.01905e-05				1879.41	1210.84	1.55215
1640065_at	8.88539	8.25236	0.633026	6.2941e-13	1.44684e-11	2.33407e-16	2.95578e-14				472.898	304.935	1.55081
1632891_s_at	10.8477	10.2189	0.628853	0.000498153	1	7.3016e-05	8.66288e-05				1842.84	1191.75	1.54633
1634310_at	11.4654	10.8372	0.628207	0.0120947	1	0.00649743	0.00322073				2827.63	1829.42	1.54564
1639180_at	10.9376	10.312	0.625622	2.00137e-06	0.000632208	1.95851e-08	1.51037e-07				1961.31	1271.21	1.54288
1632911_at	10.406	9.78589	0.62007	7.42961e-08	8.66171e-06	2.66662e-10	5.48387e-09				1356.77	882.769	1.53695
1639397_at	12.5306	11.9109	0.619725	3.33223e-07	6.16278e-05	1.90133e-09	2.49988e-08				5916.76	3850.6	1.53658
1632209_at	10.5401	9.92335	0.616785	7.26031e-09	5.50514e-07	1.69268e-11	5.35887e-10				1489.01	971.018	1.53345
1626050_at	8.99717	8.38573	0.611436	3.30805e-05	0.0251699	7.9101e-07	2.65996e-06				510.995	334.469	1.52778
1623863_a_at	9.88193	9.27397	0.607959	4.79037e-08	5.15662e-06	1.58709e-10	3.53582e-09				943.535	619.076	1.5241
1628754_s_at	9.86864	9.26183	0.606807	2.5608e-05	0.0178352	5.59325e-07	2.02984e-06				934.88	613.888	1.52289
1628989_at	8.39068	7.78483	0.605847	8.60605e-07	0.000206727	6.38893e-09	6.48622e-08				335.618	220.53	1.52187
1637478_s_at	9.29215	8.68703	0.605125	0.000192575	0.373025	1.22179e-05	2.13799e-05				626.926	412.15	1.52111
1634890_at	11.6104	11.0079	0.602547	0.000161454	0.275583	8.94984e-06	1.6745e-05				3126.67	2059.19	1.51839
1629181_at	10.66	10.0639	0.596081	5.99577e-07	0.000126879	3.91772e-09	4.51024e-08				1618.01	1070.4	1.5116
1627854_at	11.5122	10.9172	0.594939	0.0115418	1	0.00615154	0.00307588				2920.85	1933.81	1.51041
1631446_at	9.6173	9.02496	0.592343	7.93351e-08	9.48546e-06	2.92049e-10	5.85581e-09				785.41	520.935	1.50769
1629083_at	12.369	11.7772	0.591894	0.000132747	0.201498	6.49931e-06	1.30534e-05				5289.97	3509.75	1.50722
1638110_at	10.883	10.2929	0.590048	1.6042e-06	0.000464244	1.43698e-08	1.20471e-07				1888.45	1254.54	1.5053
1631165_at	9.37431	8.78598	0.58833	4.13612e-12	1.15715e-10	3.61975e-15	3.11052e-13				663.666	441.412	1.50351
1624441_at	9.27797	8.68997	0.588	9.01558e-06	0.00434262	1.35242e-07	6.93827e-07				620.794	412.992	1.50316
1628688_at	9.40792	8.82083	0.587085	2.63841e-05	0.0185019	5.80323e-07	2.09656e-06				679.305	452.204	1.50221
1624895_at	10.089	9.5033	0.585672	9.01908e-06	0.0043611	1.35822e-07	6.93976e-07				1089.14	725.734	1.50074
1636119_at	11.6739	11.0888	0.585102	1.14662e-05	0.00600579	1.87283e-07	8.87904e-07				3267.33	2178.01	1.50014
1631392_at	11.6927	11.1096	0.583118	0.00312855	1	0.00125102	0.000823997				3310.13	2209.57	1.49808
1627271_at	10.3384	9.75583	0.582605	7.24795e-05	0.0773515	2.45584e-06	6.24706e-06				1294.73	864.564	1.49755
1635756_at	9.8581	9.2776	0.580494	1.69749e-05	0.00999778	3.1244e-07	1.3282e-06				928.075	620.636	1.49536
1629152_at	12.9392	12.3593	0.579884	0.00667101	1	0.00320065	0.00177853				7853.75	5254.3	1.49473
1640295_a_at	8.63779	8.05809	0.579707	6.28475e-07	0.000133967	4.1367e-09	4.72677e-08				398.323	266.518	1.49455
1637590_at	9.46689	8.88798	0.578907	2.24234e-07	3.70345e-05	1.14188e-09	1.67528e-08				707.648	473.75	1.49372
1630520_s_at	9.97104	9.39215	0.578886	2.83155e-07	4.95677e-05	1.52878e-09	2.12623e-08				1003.65	671.921	1.4937
1634960_at	9.92488	9.3461	0.578785	0.000347113	1	3.67039e-05	5.05512e-05				972.049	650.813	1.49359
1624285_at	13.264	12.6877	0.576293	5.36763e-10	2.73329e-08	8.39616e-13	3.96116e-11				9836.83	6597.41	1.49101
1632915_s_at	9.38682	8.8116	0.575225	5.58319e-05	0.0529146	1.67335e-06	4.66539e-06				669.446	449.32	1.48991
1635135_at	9.5901	9.01772	0.572383	3.70789e-07	7.00414e-05	2.16117e-09	2.78073e-08				770.739	518.326	1.48698
1623605_a_at	11.1546	10.583	0.571599	3.28482e-07	6.04262e-05	1.8642e-09	2.46453e-08				2279.68	1533.93	1.48617
1623298_at	10.543	9.9715	0.571516	1.07266e-06	0.000280898	8.68711e-09	8.07026e-08				1491.99	1003.97	1.48608
1633795_a_at	11.3426	10.7714	0.571243	1.4261e-06	0.000395891	1.22495e-08	1.07176e-07				2596.95	1747.85	1.4858
1636864_at	10.5125	9.94228	0.570241	1.0706e-05	0.00547851	1.70782e-07	8.28462e-07				1460.78	983.842	1.48477
1640821_at	9.16995	8.60072	0.569232	6.32957e-05	0.0642017	2.03479e-06	5.351e-06				576.012	388.218	1.48373
1639928_a_at	11.2964	10.7278	0.568582	0.000358841	1	3.89081e-05	5.28012e-05				2515.14	1695.91	1.48306
1629518_at	10.4868	9.91963	0.567126	7.02069e-07	0.000156188	4.82433e-09	5.27626e-08				1434.92	968.514	1.48157
1627647_at	10.5394	9.97458	0.564814	6.56007e-07	0.000142986	4.41589e-09	4.93172e-08				1488.25	1006.12	1.4792
1634636_at	11.8363	11.2715	0.564802	1.76652e-07	2.74267e-05	8.45381e-10	1.3123e-08				3656.54	2472	1.47918
1640754_at	10.725	10.1605	0.564476	8.60338e-05	0.100296	3.19517e-06	7.60646e-06				1692.57	1144.52	1.47885
1628617_at	11.1752	10.6125	0.562642	2.19846e-07	3.56569e-05	1.0993e-09	1.63273e-08				2312.38	1565.62	1.47697
1638476_s_at	8.79902	8.23695	0.562076	7.2298e-07	0.000161553	4.9902e-09	5.43298e-08				445.42	301.695	1.47639
1629700_at	8.63716	8.07791	0.559244	1.79895e-05	0.0108205	3.3829e-07	1.40823e-06				398.147	270.206	1.4735
1636789_s_at	10.1174	9.56006	0.557317	9.9777e-06	0.00496084	1.54572e-07	7.71607e-07				1110.8	754.859	1.47153
1630286_at	10.6064	10.0495	0.556864	2.19856e-06	0.000718203	2.22567e-08	1.65795e-07				1559.01	1059.78	1.47107
1631405_at	8.82716	8.27136	0.555797	4.5715e-11	1.7352e-09	5.3473e-14	3.38581e-12				454.192	308.978	1.46998
1636742_at	9.3755	8.82158	0.553924	2.70425e-07	4.62691e-05	1.42687e-09	2.03147e-08				664.212	452.438	1.46807
1626218_s_at	9.22046	8.67218	0.548275	3.76551e-06	0.00147487	4.57991e-08	2.86599e-07				596.533	407.931	1.46234
1628345_at	9.34949	8.8037	0.545786	3.83887e-06	0.00151954	4.71922e-08	2.92092e-07				652.343	446.867	1.45981
1637394_s_at	9.61763	9.0722	0.545431	2.29265e-05	0.0153092	4.79658e-07	1.81748e-06				785.589	538.275	1.45946
1624907_at	11.6951	11.1518	0.543281	1.84843e-05	0.0112782	3.52697e-07	1.44816e-06				3315.64	2275.22	1.45728
1623428_at	10.8619	10.3188	0.543012	4.80587e-05	0.042287	1.33423e-06	3.96331e-06				1860.99	1277.26	1.45701
1630066_at	10.0147	9.47514	0.539556	4.89196e-07	9.64755e-05	2.97755e-09	3.66578e-08				1034.49	711.709	1.45353
1631055_at	9.56595	9.02763	0.538327	0.000750019	1	0.000154247	0.000154572				757.948	521.899	1.45229
1630501_a_at	9.98454	9.44637	0.538163	0.0183928	1	0.0105556	0.0048534				1013.08	697.657	1.45212
1634918_a_at	12.4883	11.9502	0.538158	3.22239e-06	0.00118194	3.66742e-08	2.44436e-07				5745.9	3956.91	1.45212
1629467_at	8.85757	8.31944	0.538131	8.43913e-06	0.0039503	1.2297e-07	6.48853e-07				463.867	319.448	1.45209
1624627_s_at	9.74767	9.21232	0.535355	3.09362e-06	0.00111959	3.47342e-08	2.34758e-07				859.691	593.177	1.4493
1625960_at	10.5343	9.99904	0.535299	0.000117796	0.166	5.33368e-06	1.12474e-05				1483.04	1023.32	1.44924
1631621_s_at	9.19584	8.66542	0.53042	0.000562408	1	9.10543e-05	0.000102857				586.441	406.025	1.44435
1637335_at	11.5326	11.0028	0.529815	0.0326918	1	0.0205189	0.00845092				2962.55	2051.99	1.44374
1639609_s_at	10.6143	10.0866	0.52765	0.00595831	1	0.00279363	0.00158944				1567.52	1087.37	1.44158
1638314_at	8.65816	8.13236	0.525807	0.000122245	0.176267	5.67011e-06	1.18119e-05				403.987	280.597	1.43974
1636510_a_at	11.2729	10.7477	0.525253	1.04903e-05	0.00535164	1.66817e-07	8.1184e-07				2474.54	1719.4	1.43919
1623666_at	9.59109	9.06731	0.523777	3.72238e-05	0.0295798	9.30652e-07	3.00972e-06				771.269	536.455	1.43771
1638038_at	10.2068	9.68339	0.523374	2.88466e-05	0.0206698	6.48646e-07	2.29515e-06				1181.79	822.225	1.43731
1623933_at	9.73732	9.21559	0.521731	0.000390956	1	4.55624e-05	5.96449e-05				853.543	594.523	1.43568
1641350_at	10.3076	9.78611	0.521497	4.79124e-08	5.20515e-06	1.60208e-10	3.53647e-09				1267.36	882.903	1.43544
1640594_at	11.5313	11.0098	0.521449	0.0120023	1	0.00644005	0.00319755				2959.79	2062	1.4354
1627151_at	9.75812	9.23876	0.519355	0.000390956	1	4.55491e-05	5.96449e-05				865.935	604.149	1.43331
1630233_at	10.6656	10.1469	0.518713	0.000818643	1	0.000177413	0.000173173				1624.31	1133.76	1.43268
1639892_at	12.1114	11.5926	0.518713	0.0586554	1	0.0398431	0.0148331				4424.68	3088.4	1.43268
1633826_at	10.8901	10.3748	0.515315	9.06628e-05	0.108065	3.44595e-06	8.08116e-06				1897.8	1327.78	1.42931
1638424_at	9.05354	8.53927	0.51427	4.5634e-08	4.81482e-06	1.48176e-10	3.3683e-09				531.359	372.03	1.42827
1625026_at	10.4414	9.92716	0.514218	0.000440485	1	5.78162e-05	7.19292e-05				1390.49	973.584	1.42822
1624851_at	8.85048	8.33658	0.5139	0.000185162	0.351186	1.14853e-05	2.03495e-05				461.593	323.266	1.42791
1626641_s_at	12.282	11.7685	0.513474	1.70402e-05	0.0100691	3.14689e-07	1.33305e-06				4980.22	3488.81	1.42748
1629014_s_at	11.3038	10.7911	0.512749	5.95682e-06	0.00262047	8.15002e-08	4.56039e-07				2528.04	1771.86	1.42677
1640318_at	10.5224	10.0137	0.508651	1.59568e-09	9.87467e-08	3.03504e-12	1.17784e-10				1470.79	1033.79	1.42272
1626456_at	10.3428	9.83441	0.508373	0.00057029	1	9.36818e-05	0.00010508				1298.64	912.964	1.42245
1641071_at	13.4477	12.94	0.507687	3.28374e-08	3.27377e-06	1.00735e-10	2.42378e-09				11172.7	7858.31	1.42177
1626442_at	11.1969	10.6892	0.507669	1.05523e-07	1.39777e-05	4.30532e-10	7.78872e-09				2347.49	1651.13	1.42175
1635558_s_at	8.63597	8.12907	0.506895	5.40337e-05	0.0501146	1.5837e-06	4.50624e-06				397.819	279.959	1.42099
1637631_at	9.61855	9.11505	0.503502	0.000486621	1	7.01249e-05	8.35695e-05				786.09	554.502	1.41765
1624608_s_at	10.3913	9.88797	0.503286	0.000115506	0.160761	5.16187e-06	1.09722e-05				1343.01	947.493	1.41744
1634599_s_at	11.8706	11.3678	0.502883	9.53268e-05	0.116061	3.70411e-06	8.56372e-06				3744.73	2642.64	1.41704
1636257_at	9.95248	9.4514	0.501079	1.3892e-07	2.04674e-05	6.30716e-10	1.02538e-08				990.819	700.091	1.41527
1628429_at	10.9641	10.4652	0.498943	8.60338e-05	0.10032	3.19611e-06	7.60646e-06				1997.69	1413.61	1.41318
1640635_a_at	10.1989	9.70095	0.497995	7.72881e-05	0.0851378	2.70631e-06	6.72215e-06				1175.41	832.293	1.41225
1635189_at	9.81792	9.32145	0.496467	0.0689013	1	0.0477118	0.0173334				902.584	639.788	1.41075
1623695_a_at	10.8151	10.3187	0.496444	4.09084e-05	0.0339137	1.06822e-06	3.32379e-06				1801.65	1277.1	1.41073
1640488_a_at	10.8754	10.3795	0.495903	0.00500949	1	0.00225779	0.00133344				1878.61	1332.15	1.4102
1637422_at	11.1108	10.6155	0.495341	9.01558e-06	0.0043347	1.34987e-07	6.93827e-07				2211.49	1568.82	1.40965
1639374_s_at	12.0548	11.5594	0.495319	0.00627787	1	0.00297794	0.00167233				4254.48	3018.15	1.40963
1624117_at	8.91294	8.41764	0.495295	3.32119e-06	0.00123765	3.841e-08	2.52508e-07				482.017	341.951	1.40961
1627270_at	10.1963	9.70172	0.494548	5.48863e-05	0.0515413	1.6294e-06	4.57059e-06				1173.23	832.74	1.40888
1638469_s_at	10.3012	9.80707	0.494177	3.92961e-09	2.70578e-07	8.31782e-12	2.9005e-10				1261.78	895.823	1.40852
1626414_at	10.8227	10.3292	0.493527	9.4491e-08	1.2329e-05	3.79727e-10	6.97449e-09				1811.2	1286.47	1.40788
1636180_at	11.6601	11.1672	0.492904	8.13911e-05	0.0927003	2.95055e-06	7.13497e-06				3236.3	2299.69	1.40728
1637690_at	8.7843	8.29177	0.492528	5.07543e-10	2.5339e-08	7.78433e-13	3.74596e-11				440.898	313.381	1.40691
1637367_at	11.3487	10.8566	0.492049	5.98486e-07	0.000126058	3.89223e-09	4.50243e-08				2607.93	1854.28	1.40644
1638772_at	10.5548	10.0637	0.491102	2.04205e-06	0.000649062	2.01085e-08	1.54086e-07				1504.27	1070.26	1.40552
1625076_at	9.64659	9.15552	0.491067	6.32957e-05	0.0641582	2.03335e-06	5.351e-06				801.517	570.278	1.40548
1635494_at	10.4455	9.95489	0.490631	0.000243359	0.560108	1.86039e-05	2.98021e-05				1394.49	992.474	1.40506
1631546_at	10.2482	9.75781	0.490385	6.16896e-08	7.06949e-06	2.1763e-10	4.55337e-09				1216.23	865.753	1.40482
1627493_at	10.9151	10.4248	0.49028	0.00183202	1	0.000610843	0.00045815				1931	1374.65	1.40472
1639353_at	10.1417	9.6528	0.488937	6.1693e-09	4.55506e-07	1.40049e-11	4.55366e-10				1129.71	804.977	1.40341
1638877_at	8.97193	8.48312	0.488816	9.00034e-10	5.21107e-08	1.60145e-12	6.64351e-11				502.136	357.827	1.40329
1635500_a_at	9.39371	8.90504	0.488675	0.000150429	0.244824	7.92799e-06	1.52604e-05				672.649	479.383	1.40316
1629540_a_at	9.78005	9.29152	0.488525	6.0325e-09	4.394e-07	1.3509e-11	4.45259e-10				879.2	626.653	1.40301
1637142_at	9.8961	9.40844	0.487662	0.00145721	1	0.00043844	0.000351642				952.847	679.552	1.40217
1638722_at	9.36538	8.87799	0.487387	4.45182e-05	0.0381618	1.20316e-06	3.65058e-06				659.57	470.482	1.4019
1623364_at	11.9033	11.417	0.486253	2.18304e-09	1.41619e-07	4.35317e-12	1.6114e-10				3830.45	2734.47	1.4008
1641066_s_at	11.1634	10.6778	0.485643	0.000426578	1	5.42775e-05	6.84469e-05				2293.65	1638.07	1.40021
1639054_s_at	8.59413	8.10933	0.484798	3.79688e-05	0.030597	9.62986e-07	3.08202e-06				386.448	276.155	1.39939
1630929_at	10.799	10.3167	0.482204	0.000162136	0.277535	9.01468e-06	1.6837e-05				1781.59	1275.41	1.39688
1630236_s_at	11.4759	10.9938	0.482068	0.00115368	1	0.000308717	0.000267003				2848.23	2039.19	1.39674
1635894_at	9.01955	8.53801	0.481532	1.76528e-07	2.72325e-05	8.39371e-10	1.31143e-08				518.984	371.705	1.39623
1641224_s_at	8.75358	8.27301	0.48057	5.47282e-05	0.0510361	1.61308e-06	4.56107e-06				431.61	309.332	1.39529
1629804_s_at	10.9647	10.4841	0.48056	6.06265e-05	0.0604741	1.91562e-06	5.12129e-06				1998.45	1432.29	1.39529
1635177_at	10.21	9.73017	0.479835	2.76312e-07	4.78231e-05	1.47488e-09	2.07526e-08				1184.45	849.323	1.39458
1631167_at	10.7177	10.2379	0.47983	0.000111564	0.151728	4.86667e-06	1.04925e-05				1684.07	1207.58	1.39458
1628632_at	10.0405	9.56092	0.479607	2.77329e-05	0.0197658	6.20201e-07	2.20749e-06				1053.17	755.306	1.39436
1625503_at	11.1031	10.6237	0.479393	9.77307e-05	0.120367	3.84351e-06	8.84114e-06				2199.65	1577.76	1.39416
1641531_at	8.10021	7.62083	0.479377	7.53198e-07	0.000171779	5.30656e-09	5.65783e-08				274.413	196.833	1.39414
1639419_at	11.4482	10.9692	0.478946	1.39499e-06	0.000384511	1.18966e-08	1.04851e-07				2794.11	2004.78	1.39372
1636005_at	9.37478	8.89596	0.478817	2.74196e-08	2.59735e-06	7.99084e-11	2.02386e-09				663.882	476.379	1.3936
1631215_at	9.03006	8.55152	0.478532	0.000476122	1	6.73281e-05	8.09715e-05				522.779	375.202	1.39333
1634130_a_at	11.571	11.0936	0.477317	0.000278336	0.70831	2.37552e-05	3.61983e-05				3042.31	2185.33	1.39215
1638567_at	9.63272	9.15677	0.47595	2.54722e-05	0.0177085	5.55315e-07	2.01929e-06				793.85	570.772	1.39083
1635161_at	10.7424	10.2675	0.474951	0.000119445	0.170617	5.48555e-06	1.15172e-05				1713.14	1232.59	1.38987
1638629_at	9.47703	9.00329	0.47374	1.7741e-05	0.0106369	3.32527e-07	1.38905e-06				712.64	513.169	1.38871
1641627_at	10.423	9.95165	0.471332	0.000112937	0.153802	4.9335e-06	1.06271e-05				1372.87	990.251	1.38639
1636255_s_at	10.7871	10.3165	0.470631	0.000139686	0.218005	7.04242e-06	1.38811e-05				1767.04	1275.18	1.38572
1625433_at	12.8009	12.331	0.469927	0.0512972	1	0.0342753	0.0130407				7135.97	5152.18	1.38504
1627894_s_at	9.7467	9.27756	0.469137	9.09322e-08	1.1594e-05	3.57056e-10	6.71179e-09				859.111	620.619	1.38428
1638687_at	9.16535	8.69884	0.466511	0.000109898	0.146852	4.70634e-06	1.02944e-05				574.175	415.538	1.38176
1633293_at	10.5214	10.055	0.466428	1.20648e-05	0.00643061	2.00599e-07	9.35387e-07				1469.83	1063.8	1.38168
1625462_s_at	10.6585	10.1939	0.464604	0.00322265	1	0.00129814	0.000849914				1616.28	1171.27	1.37994
1624742_a_at	11.6086	11.1442	0.464453	3.25636e-07	5.84738e-05	1.80369e-09	2.44406e-08				3122.81	2263.24	1.37979
1628013_at	10.9946	10.5302	0.464443	0.00120762	1	0.000331338	0.000282906				2040.36	1478.75	1.37978
1628101_s_at	11.5661	11.1026	0.463516	1.70294e-06	0.00050679	1.56906e-08	1.28412e-07				3032.17	2198.98	1.3789
1636689_at	9.56024	9.09732	0.46292	8.41968e-08	1.03387e-05	3.18341e-10	6.21466e-09				754.952	547.73	1.37833
1625572_s_at	12.0618	11.6004	0.461445	0.000127832	0.18965	6.10965e-06	1.25003e-05				4275.41	3105.06	1.37692
1634640_at	10.1568	9.69541	0.461369	3.02206e-08	2.9528e-06	9.08528e-11	2.23061e-09				1141.55	829.104	1.37685
1640462_at	10.2324	9.77118	0.461192	0.000109071	0.145248	4.65421e-06	1.0199e-05				1202.96	873.812	1.37668
1625652_s_at	10.1682	9.70718	0.46107	3.30316e-05	0.025086	7.88348e-07	2.65664e-06				1150.66	835.895	1.37656
1625835_at	9.50541	9.04457	0.460842	3.38558e-06	0.00126495	3.92586e-08	2.57384e-07				726.798	528.064	1.37634
1631832_at	11.6667	11.2062	0.460525	2.28271e-06	0.00076048	2.35706e-08	1.72574e-07				3251.02	2362.58	1.37604
1627382_at	11.6938	11.2343	0.459482	7.4419e-05	0.0802802	2.55003e-06	6.42472e-06				3312.74	2409.18	1.37505
1638325_at	12.6455	12.1862	0.459277	8.5271e-05	0.0991934	3.15993e-06	7.54274e-06				6407.2	4660.28	1.37485
1631513_at	10.0469	9.58924	0.457641	2.60804e-06	0.000898078	2.78465e-08	1.97597e-07				1057.82	770.282	1.37329
1630027_s_at	12.1007	11.6432	0.457429	5.97386e-05	0.0588606	1.86374e-06	5.03292e-06				4392.02	3198.64	1.37309
1635723_s_at	10.6565	10.2002	0.4563	2.36896e-06	0.000797069	2.47084e-08	1.79068e-07				1614.14	1176.47	1.37202
1624580_at	9.02354	8.56912	0.454423	1.14815e-08	9.50571e-07	2.92339e-11	8.47463e-10				520.424	379.807	1.37023
1639588_at	9.62031	9.16667	0.453641	0.000160413	0.27338	8.87741e-06	1.66354e-05				787.052	574.703	1.36949
1627236_s_at	8.8546	8.40111	0.453487	0.00179701	1	0.000594759	0.000447621				462.914	338.055	1.36935
1632791_at	9.601	9.14798	0.45302	0.000245278	0.568569	1.88969e-05	3.0131e-05				776.585	567.304	1.3689
1628572_s_at	10.59	10.1374	0.452608	1.28186e-07	1.82507e-05	5.62323e-10	9.46154e-09				1541.35	1126.3	1.36851
1640720_a_at	10.8615	10.4092	0.452343	9.0566e-06	0.00438873	1.36691e-07	6.96803e-07				1860.54	1359.78	1.36826
1628358_at	10.4756	10.0235	0.452068	0.00171926	1	0.000556999	0.00042436				1423.86	1040.83	1.368
1633836_a_at	10.9307	10.4789	0.451776	1.0291e-06	0.000265615	8.21345e-09	7.74428e-08				1951.88	1427.1	1.36772
1631227_at	11.0295	10.5777	0.451763	0.00282454	1	0.00109521	0.000736702				2090.29	1528.32	1.36771
1627293_at	10.1656	9.71445	0.451117	5.48562e-05	0.0513708	1.62391e-06	4.56991e-06				1148.53	840.12	1.3671
1626805_s_at	9.94722	9.49631	0.450909	4.97531e-05	0.0444355	1.40264e-06	4.11069e-06				987.215	722.228	1.3669
1634433_at	11.9316	11.4808	0.450839	2.79578e-05	0.0199528	6.26088e-07	2.22515e-06				3906.4	2857.99	1.36683
1626074_at	10.0223	9.57156	0.450776	0.000108996	0.145049	4.64767e-06	1.01939e-05				1039.98	760.901	1.36678
1626369_at	11.089	10.6394	0.449552	3.18449e-06	0.00116181	3.60476e-08	2.41598e-07				2178.3	1595.1	1.36562
1629430_s_at	10.7622	10.3132	0.449014	0.015068	1	0.00838961	0.0039933				1736.79	1272.28	1.36511
1626694_at	8.97935	8.53111	0.448238	1.84079e-05	0.0111608	3.48981e-07	1.44027e-06				504.723	369.93	1.36437
1625594_s_at	9.48449	9.03632	0.448168	0.00111775	1	0.000293821	0.000257263				716.333	525.053	1.36431
1623102_at	11.4212	10.9732	0.44801	0.000327017	0.961232	3.27696e-05	4.62173e-05				2742.35	2010.29	1.36416
1641412_at	9.62754	9.17999	0.447547	1.62968e-05	0.0093682	2.92628e-07	1.26635e-06				791.004	580.034	1.36372
1638663_at	11.4883	11.0409	0.447444	0.000706422	1	0.000138931	0.000142611				2872.92	2106.83	1.36362
1623274_s_at	8.55168	8.10717	0.444514	6.16388e-06	0.00272355	8.47112e-08	4.71812e-07				375.244	275.741	1.36086
1631595_at	10.3991	9.95485	0.444271	1.67005e-07	2.52671e-05	7.7872e-10	1.24084e-08				1350.35	992.45	1.36063
1629961_s_at	10.1872	9.74431	0.44294	8.89241e-05	0.105417	3.36078e-06	7.90454e-06				1165.92	857.688	1.35937
1635390_s_at	11.1649	10.7228	0.442084	0.00183115	1	0.000610457	0.000458003				2296.03	1690.04	1.35857
1630313_a_at	8.61374	8.17268	0.441063	2.99681e-08	2.89835e-06	8.91743e-11	2.21197e-09				391.737	288.55	1.3576
1639574_a_at	9.56285	9.12361	0.439246	0.00014764	0.236584	7.6542e-06	1.48642e-05				756.319	557.801	1.3559
1634207_at	10.149	9.71009	0.438875	2.51466e-06	0.00085361	2.64636e-08	1.90029e-07				1135.38	837.584	1.35555
1639256_at	11.1783	10.7405	0.437834	1.71176e-06	0.000515538	1.59634e-08	1.29325e-07				2317.44	1710.83	1.35457
1623816_s_at	11.6036	11.1671	0.436417	5.61579e-06	0.00243415	7.56888e-08	4.29136e-07				3111.85	2299.55	1.35324
1628759_a_at	9.1037	8.66765	0.436055	3.17848e-05	0.0236546	7.42991e-07	2.54659e-06				550.158	406.651	1.3529
1635744_at	10.2659	9.82986	0.436013	0.000398023	1	4.75459e-05	6.16378e-05				1231.22	910.089	1.35286
1636639_at	10.4183	9.98281	0.435522	5.48863e-05	0.0514636	1.6269e-06	4.57059e-06				1368.45	1011.87	1.3524
1626646_s_at	10.9694	10.5342	0.435173	8.66461e-07	0.000208987	6.45898e-09	6.52979e-08				2004.99	1482.9	1.35207
1625897_s_at	10.3605	9.92546	0.435004	5.30176e-05	0.0485368	1.53321e-06	4.40746e-06				1314.65	972.436	1.35191
1633094_a_at	9.328	8.8935	0.434503	0.000445498	1	5.90389e-05	7.29599e-05				642.7	475.565	1.35145
1641295_s_at	10.4719	10.0375	0.434404	1.90139e-06	0.000593167	1.83734e-08	1.43533e-07				1420.25	1050.98	1.35135
1634939_at	10.2425	9.80847	0.433991	6.45039e-07	0.000138409	4.27414e-09	4.85093e-08				1211.4	896.691	1.35097
1632734_s_at	12.2442	11.8108	0.433399	1.60532e-05	0.00917644	2.86611e-07	1.24479e-06				4851.55	3592.64	1.35041
1624839_at	10.612	10.1788	0.43326	3.10156e-05	0.0229638	7.21204e-07	2.48252e-06				1565.11	1159.1	1.35028
1641609_at	9.81943	9.38669	0.432736	3.72405e-05	0.0297346	9.35638e-07	3.0137e-06				903.528	669.384	1.34979
1634988_a_at	10.9386	10.5066	0.432019	4.42036e-06	0.00182407	5.66817e-08	3.37578e-07				1962.66	1454.77	1.34912
1623073_s_at	12.1562	11.7246	0.431619	8.60087e-06	0.00405106	1.26119e-07	6.6112e-07				4564.5	3384.25	1.34875
1634756_at	8.74986	8.31851	0.43135	0.000180612	0.334864	1.0934e-05	1.96183e-05				430.497	319.243	1.3485
1624821_at	10.5543	10.1236	0.430679	1.0002e-05	0.00498258	1.55255e-07	7.73411e-07				1503.72	1115.63	1.34787
1624199_at	9.27121	8.84093	0.430282	1.18131e-06	0.000313997	9.71195e-09	8.88511e-08				617.894	458.549	1.3475
1636149_at	12.0404	11.6103	0.430172	8.86943e-08	1.12206e-05	3.45548e-10	6.54662e-09				4212.43	3126.35	1.34739
1641446_s_at	10.5006	10.0708	0.429737	3.81116e-05	0.0308028	9.69555e-07	3.09176e-06				1448.74	1075.54	1.34699
1633639_at	11.8239	11.3942	0.429662	0.000321612	0.936201	3.18783e-05	4.52642e-05				3625.24	2691.51	1.34692
1638733_at	9.41692	8.98757	0.429342	0.000167524	0.291681	9.48431e-06	1.75945e-05				683.557	507.609	1.34662
1630439_at	8.88333	8.45413	0.429201	7.6906e-12	2.45865e-10	7.39593e-15	5.56103e-13				472.226	350.71	1.34649
1626352_at	10.2195	9.7912	0.428334	0.000167862	0.294431	9.5781e-06	1.77003e-05				1192.3	886.022	1.34568
1639408_a_at	8.54094	8.11397	0.426972	0.00016194	0.276989	8.99666e-06	1.68196e-05				372.461	277.044	1.34441
1626783_at	10.7744	10.3484	0.425969	0.000573982	1	9.48184e-05	0.000105817				1751.51	1303.72	1.34347
1637797_at	9.88779	9.46216	0.42563	8.12906e-06	0.00377831	1.17602e-07	6.2518e-07				947.374	705.333	1.34316
1625901_s_at	12.6737	12.2483	0.425421	0.00494579	1	0.00222195	0.00131777				6533.79	4865.2	1.34296
1625201_s_at	8.85135	8.4261	0.425253	2.79723e-06	0.000982234	3.04625e-08	2.12451e-07				461.873	343.96	1.34281
1623459_at	10.0206	9.59538	0.42523	2.63878e-05	0.0185297	5.81214e-07	2.09663e-06				1038.73	773.565	1.34279
1626314_at	10.2936	9.86885	0.424789	1.57961e-06	0.000452473	1.40041e-08	1.18645e-07				1255.15	935.019	1.34238
1636407_at	9.92486	9.50055	0.424309	3.33571e-07	6.20218e-05	1.91354e-09	2.50226e-08				972.032	724.354	1.34193
1641164_s_at	8.95094	8.52734	0.423595	1.10425e-10	4.65554e-09	1.43098e-13	8.1543e-12				494.88	368.965	1.34127
1640817_at	8.76343	8.34025	0.423186	1.13112e-05	0.00586481	1.82864e-07	8.74727e-07				434.567	324.089	1.34089
1635792_a_at	10.821	10.3992	0.421775	0.000989356	1	0.000242741	0.00022199				1809.02	1350.44	1.33957
1629205_at	10.9031	10.4814	0.421702	9.45816e-07	0.000232785	7.19561e-09	7.12481e-08				1914.95	1429.6	1.33951
1635450_a_at	10.9896	10.5682	0.421434	0.0425875	1	0.0277815	0.010901				2033.34	1518.26	1.33926
1632203_at	11.1011	10.68	0.421046	3.65085e-06	0.00140684	4.36785e-08	2.78028e-07				2196.61	1640.61	1.3389
1631370_at	9.532	9.11174	0.420253	1.941e-05	0.0121602	3.80483e-07	1.5309e-06				740.315	553.232	1.33816
1630173_a_at	9.2488	8.82895	0.419846	7.91087e-05	0.0887238	2.82236e-06	6.89427e-06				608.367	454.757	1.33778
1623216_s_at	10.055	9.63553	0.419497	0.00254325	1	0.000953386	0.00065842				1063.81	795.395	1.33746
1622925_at	9.08846	8.66936	0.419098	1.84437e-05	0.0112011	3.50253e-07	1.44305e-06				544.375	407.134	1.33709
1635336_at	9.44659	9.02799	0.418599	2.02361e-05	0.0128528	4.02264e-07	1.59454e-06				697.761	522.031	1.33663
1634131_s_at	9.26685	8.84846	0.418389	0.000335044	0.999357	3.41334e-05	4.77767e-05				616.029	460.949	1.33643
1641451_at	9.76118	9.34333	0.417848	2.71663e-07	4.67497e-05	1.44174e-09	2.04056e-08				867.776	649.566	1.33593
1624454_at	9.45688	9.03924	0.417637	9.91142e-05	0.123258	3.93745e-06	8.97935e-06				702.755	526.118	1.33574
1631761_at	12.4171	11.9998	0.41721	5.81794e-05	0.0563418	1.78297e-06	4.88609e-06				5468.98	4095.56	1.33534
1625430_at	10.3354	9.91947	0.415945	0.0251324	1	0.0151539	0.00655452				1292.02	968.404	1.33417
1641359_at	10.7549	10.3395	0.415487	2.91573e-08	2.79095e-06	8.58675e-11	2.15214e-09				1728.06	1295.64	1.33375
1625879_at	10.0315	9.61615	0.41536	0.00053837	1	8.42413e-05	9.68429e-05				1046.61	784.785	1.33363
1631909_at	11.2166	10.8015	0.415093	2.9177e-06	0.00104451	3.2401e-08	2.21477e-07				2379.68	1784.69	1.33338
1625053_at	9.00174	8.58671	0.415028	3.03852e-07	5.34914e-05	1.64985e-09	2.28143e-08				512.619	384.467	1.33332
1627436_s_at	10.3044	9.88959	0.414833	0.000830522	1	0.000181681	0.000176719				1264.57	948.56	1.33314
1635910_at	9.7302	9.3154	0.414799	0.000151097	0.246453	7.98177e-06	1.53271e-05				849.341	637.111	1.33311
1637808_a_at	9.71114	9.29675	0.414391	6.09377e-05	0.0608416	1.92732e-06	5.14685e-06				838.196	628.928	1.33274
1625595_a_at	11.7914	11.3771	0.414261	0.000293839	0.792495	2.67446e-05	3.97467e-05				3544.48	2659.79	1.33262
1635531_at	10.8062	10.392	0.414212	0.000153091	0.254542	8.25283e-06	1.56973e-05				1790.59	1343.71	1.33257
1626918_at	9.4271	9.01296	0.41414	5.2518e-08	5.91415e-06	1.82052e-10	3.87641e-09				688.399	516.621	1.3325
1638669_at	11.756	11.3428	0.413273	0.000130171	0.196022	6.31982e-06	1.27568e-05				3458.75	2597.24	1.3317
1633918_s_at	9.89611	9.48382	0.412294	0.000426211	1	5.40903e-05	6.82466e-05				952.853	716	1.3308
1629153_s_at	10.8628	10.4508	0.411992	0.00097352	1	0.000236257	0.000217309				1862.24	1399.63	1.33052
1623514_a_at	10.9694	10.5576	0.411868	0.00352935	1	0.00146109	0.000932719				2005.07	1507.11	1.33041
1633612_at	8.962	8.55039	0.411612	0.000921713	1	0.000216079	0.000202613				498.69	374.906	1.33017
1632279_at	9.96299	9.5517	0.411289	0.000450172	1	6.02295e-05	7.43168e-05				998.064	750.496	1.32987
1628271_at	11.0084	10.5972	0.411159	0.000923276	1	0.000216931	0.000203175				2059.91	1549.09	1.32975
1634440_s_at	8.58467	8.17385	0.410827	0.000129629	0.194308	6.26314e-06	1.27063e-05				383.923	288.784	1.32945
1636198_at	10.4977	10.087	0.410727	0.000108844	0.143909	4.60951e-06	1.01472e-05				1445.84	1087.62	1.32936
1633112_at	10.6336	10.2234	0.41018	3.15911e-06	0.00114638	3.55664e-08	2.39709e-07				1588.69	1195.54	1.32885
1624688_at	10.025	9.61545	0.409551	1.3306e-06	0.000365456	1.13067e-08	1.00018e-07				1041.9	784.403	1.32827
1630897_at	9.02657	8.61752	0.409053	0.00039773	1	4.74866e-05	6.16273e-05				521.518	392.765	1.32781
1634971_at	9.39676	8.98835	0.408414	3.78794e-05	0.0304246	9.575e-07	3.07588e-06				674.072	507.881	1.32723
1633432_at	9.9773	9.56919	0.408106	0.000123326	0.179549	5.77849e-06	1.197e-05				1008.01	759.651	1.32694
1630636_s_at	9.7379	9.32982	0.408077	0.000344681	1	3.61083e-05	4.99182e-05				853.884	643.51	1.32692
1633559_at	11.6688	11.2609	0.407885	9.88349e-07	0.000246738	7.62762e-09	7.44219e-08				3255.71	2453.92	1.32674
1638301_at	9.28705	8.87934	0.407713	3.07274e-08	3.03287e-06	9.33189e-11	2.26802e-09				624.713	470.92	1.32658
1634920_at	9.32827	8.92132	0.406957	4.53357e-09	3.21192e-07	9.87445e-12	3.34631e-10				642.821	484.824	1.32589
1623957_s_at	11.1365	10.7298	0.406638	0.00270076	1	0.00103361	0.000702027				2251.17	1698.24	1.32559
1630038_at	10.1337	9.72718	0.406496	4.57483e-05	0.0396921	1.25184e-06	3.76035e-06				1123.41	847.564	1.32546
1634836_a_at	9.49574	9.09033	0.405411	0.000204979	0.414853	1.36326e-05	2.33129e-05				721.943	545.083	1.32447
1634061_a_at	10.0086	9.60321	0.405356	0.000295905	0.803872	2.71505e-05	4.01516e-05				1030.1	777.775	1.32442
1635909_at	8.89663	8.49146	0.405166	0.000129868	0.19523	6.29369e-06	1.27165e-05				476.598	359.902	1.32424
1629791_at	10.2024	9.79758	0.404838	8.99154e-05	0.106842	3.40651e-06	8.00427e-06				1178.24	889.952	1.32394
1640377_s_at	9.36593	8.96118	0.404745	2.38583e-05	0.0161883	5.07375e-07	1.89458e-06				659.82	498.408	1.32386
1637993_at	9.24491	8.84122	0.403687	3.76551e-06	0.00147675	4.58589e-08	2.86599e-07				606.728	458.64	1.32288
1630453_at	10.578	10.1745	0.403519	0.000110192	0.147981	4.74344e-06	1.03248e-05				1528.6	1155.64	1.32273
1635740_at	10.3728	9.96965	0.403141	2.28271e-06	0.00076069	2.35778e-08	1.72574e-07				1325.93	1002.68	1.32238
1631376_at	10.1416	9.73913	0.402502	1.64701e-05	0.00957352	2.99107e-07	1.28514e-06				1129.63	854.613	1.3218
1627816_a_at	10.1659	9.76361	0.402258	1.28849e-05	0.00697981	2.17792e-07	1.00005e-06				1148.77	869.24	1.32158
1625531_at	11.5825	11.1808	0.401668	6.22604e-06	0.00275707	8.57565e-08	4.76531e-07				3066.66	2321.41	1.32103
1624409_a_at	11.5568	11.1553	0.401546	0.000384612	1	4.4206e-05	5.81858e-05				3012.65	2280.72	1.32092
1631205_a_at	12.2045	11.803	0.401488	0.00567043	1	0.00262752	0.00151499				4719.78	3573.24	1.32087
1632650_at	12.6208	12.2196	0.401154	5.49221e-07	0.000112428	3.47075e-09	4.13413e-08				6298.48	4769.53	1.32056
1628730_at	9.73341	9.33242	0.40099	1.34052e-05	0.00733942	2.29049e-07	1.03985e-06				851.235	644.673	1.32041
1630948_s_at	8.85472	8.45421	0.400515	1.60834e-06	0.000467023	1.44562e-08	1.20774e-07				462.954	350.728	1.31998
1632955_at	9.21014	8.8104	0.399739	7.09178e-05	0.0747895	2.37367e-06	6.10041e-06				592.282	448.947	1.31927
1631266_a_at	9.89291	9.49388	0.39903	0.000210084	0.433353	1.42611e-05	2.41815e-05				950.745	721.014	1.31862
1631060_at	8.55462	8.15624	0.398374	0.000375891	1	4.22615e-05	5.64187e-05				376.007	285.282	1.31802
1629573_at	8.81397	8.41567	0.398297	0.00113167	1	0.000299795	0.00026117				450.058	341.483	1.31795
1627067_at	10.6292	10.2313	0.397968	7.72881e-05	0.0852288	2.70938e-06	6.72215e-06				1583.86	1202.03	1.31765
1631112_at	9.50291	9.1063	0.396616	2.54722e-05	0.0177162	5.55577e-07	2.01929e-06				725.541	551.148	1.31642
1630067_a_at	11.1626	10.7661	0.396491	4.38831e-05	0.0374513	1.18061e-06	3.59122e-06				2292.38	1741.53	1.3163
1637971_a_at	9.65112	9.25547	0.395643	2.03576e-06	0.000645068	1.99841e-08	1.53622e-07				804.037	611.189	1.31553
1633446_s_at	9.79544	9.40079	0.394657	3.37859e-05	0.0257876	8.10496e-07	2.71605e-06				888.633	675.957	1.31463
1626808_s_at	11.2546	10.8602	0.394389	3.01529e-05	0.0220087	6.90969e-07	2.40598e-06				2443.2	1858.81	1.31439
1630844_at	12.4063	12.013	0.393362	0.000118319	0.167275	5.37551e-06	1.13158e-05				5428.48	4133	1.31345
1637669_at	9.09213	8.69896	0.393169	1.28325e-07	1.83978e-05	5.66871e-10	9.47183e-09				545.764	415.575	1.31328
1632644_s_at	11.0205	10.6274	0.393095	0.000218358	0.466616	1.53999e-05	2.55895e-05				2077.31	1581.86	1.31321
1635585_at	9.12869	8.73565	0.393035	0.000116893	0.16377	5.26049e-06	1.11223e-05				559.77	426.279	1.31315
1640243_at	9.79969	9.40668	0.393016	1.08899e-06	0.000286246	8.85278e-09	8.19254e-08				891.255	678.722	1.31314
1636900_at	11.8435	11.4507	0.392786	3.49402e-06	0.00130888	4.06232e-08	2.65606e-07				3674.87	2798.99	1.31293
1625997_s_at	11.4112	11.0185	0.392778	7.35509e-06	0.00332141	1.03339e-07	5.65098e-07				2723.48	2074.37	1.31292
1628331_at	8.72645	8.33376	0.392683	0.000359277	1	3.90004e-05	5.28668e-05				423.567	322.636	1.31283
1627773_a_at	11.9423	11.5499	0.392369	1.49259e-06	0.000418749	1.29579e-08	1.12151e-07				3935.35	2998.25	1.31255
1626323_s_at	9.42802	9.03579	0.392234	0.000139388	0.217229	7.01688e-06	1.38501e-05				688.838	524.859	1.31242
1633597_at	11.7647	11.3729	0.391813	5.00967e-05	0.0449314	1.41847e-06	4.14699e-06				3479.65	2652.09	1.31204
1639625_at	9.65264	9.26083	0.391812	2.88575e-05	0.0207051	6.49775e-07	2.29577e-06				804.885	613.461	1.31204
1635745_a_at	11.6001	11.2083	0.39176	5.12883e-05	0.0463388	1.46322e-06	4.25198e-06				3104.36	2366.14	1.31199
1641124_at	10.1167	9.72496	0.39175	2.91323e-06	0.00102866	3.19045e-08	2.21225e-07				1110.28	846.263	1.31198
1632195_at	10.0484	9.65668	0.391713	1.30604e-05	0.00708749	2.21159e-07	1.01358e-06				1058.93	807.145	1.31195
1638132_at	9.98756	9.59659	0.390976	0.012384	1	0.00667943	0.00329465				1015.21	774.214	1.31128
1641616_at	10.9255	10.5356	0.389833	3.31926e-05	0.0253031	7.95245e-07	2.66866e-06				1944.88	1484.37	1.31024
1635462_at	9.20835	8.81933	0.389026	0.000236539	0.532161	1.76399e-05	2.86005e-05				591.549	451.734	1.30951
1627845_at	11.0777	10.6888	0.388907	1.24488e-06	0.000334568	1.03492e-08	9.36132e-08				2161.26	1650.57	1.3094
1630088_at	10.1871	9.79851	0.388563	0.000167743	0.293172	9.53497e-06	1.76613e-05				1165.78	890.525	1.30909
1633880_s_at	8.99025	8.60178	0.388471	1.28958e-07	1.86163e-05	5.7362e-10	9.5185e-09				508.553	388.503	1.30901
1632448_s_at	9.51676	9.12831	0.388451	0.000102597	0.131644	4.21113e-06	9.40795e-06				732.538	559.622	1.30899
1636487_at	10.1344	9.74604	0.388391	7.28494e-05	0.0781119	2.48061e-06	6.28933e-06				1124	858.716	1.30893
1637275_a_at	9.29438	8.90599	0.38839	4.73225e-06	0.00196661	6.11165e-08	3.61307e-07				627.894	479.7	1.30893
1626689_at	9.98172	9.59372	0.388	8.61257e-05	0.100791	3.21145e-06	7.63542e-06				1011.11	772.678	1.30858
1625471_s_at	9.86732	9.47945	0.387861	0.000532731	1	8.28888e-05	9.57675e-05				934.024	713.839	1.30845
1638890_at	11.2683	10.8809	0.387486	0.00032007	0.930393	3.16751e-05	4.50167e-05				2466.66	1885.66	1.30811
1633998_s_at	10.7673	10.38	0.38729	9.21131e-05	0.110219	3.51521e-06	8.21157e-06				1742.98	1332.62	1.30793
1624474_at	10.3064	9.91955	0.386851	9.46942e-06	0.00465306	1.44955e-07	7.29655e-07				1266.3	968.462	1.30754
1625453_a_at	10.805	10.4182	0.38678	1.56496e-06	0.00044674	1.38262e-08	1.17552e-07				1789.1	1368.37	1.30747
1629055_a_at	12.579	12.1927	0.386288	0.0009451	1	0.000224818	0.000208991				6118.72	4681.41	1.30703
1636657_at	9.51184	9.12593	0.385904	0.00345338	1	0.00142212	0.000912466				730.043	558.701	1.30668
1625768_s_at	8.67319	8.28811	0.385073	7.24795e-05	0.0775126	2.46134e-06	6.24706e-06				408.215	312.587	1.30593
1631867_at	9.76923	9.38432	0.38491	1.48721e-05	0.00835784	2.60962e-07	1.15422e-06				872.635	668.287	1.30578
1639730_at	8.95659	8.57191	0.384683	1.93705e-07	3.02661e-05	9.32929e-10	1.43892e-08				496.824	380.541	1.30557
1624471_s_at	10.1089	9.72501	0.383924	9.56964e-05	0.117108	3.73824e-06	8.62373e-06				1104.32	846.294	1.30489
1626684_at	10.9803	10.5964	0.383854	2.48858e-05	0.0171894	5.3897e-07	1.97384e-06				2020.17	1548.24	1.30482
1630816_at	9.97582	9.5924	0.383421	7.34847e-06	0.00331127	1.0302e-07	5.64637e-07				1006.98	771.97	1.30443
1636431_at	10.333	9.9497	0.383281	0.00105758	1	0.000270641	0.000240735				1289.84	988.914	1.3043
1628432_at	10.2472	9.86399	0.383177	0.000319742	0.926619	3.15348e-05	4.495e-05				1215.36	931.872	1.30421
1638717_at	10.3998	10.0171	0.382676	5.59163e-05	0.0530471	1.67759e-06	4.6718e-06				1350.95	1036.2	1.30376
1630055_a_at	10.138	9.7555	0.382548	9.90013e-06	0.00489513	1.52511e-07	7.64162e-07				1126.82	864.366	1.30364
1635812_at	8.96829	8.586	0.382294	4.5634e-08	4.82163e-06	1.4839e-10	3.3683e-09				500.871	384.276	1.30341
1639530_at	9.95232	9.57014	0.382179	8.82597e-08	1.09905e-05	3.3844e-10	6.51454e-09				990.713	760.152	1.30331
1629295_at	9.63534	9.25408	0.381259	0.00225553	1	0.000810174	0.000576732				795.293	610.6	1.30248
1631868_at	10.4223	10.0412	0.381043	0.00034864	1	3.71166e-05	5.09446e-05				1372.19	1053.68	1.30228
1637144_a_at	9.82885	9.44781	0.38104	0.000223577	0.484099	1.59943e-05	2.6413e-05				909.447	698.35	1.30228
1624403_at	8.71933	8.33834	0.380994	7.73059e-09	6.01562e-07	1.84977e-11	5.70605e-10				421.484	323.661	1.30224
1638165_s_at	8.4808	8.09988	0.380927	0.000192379	0.372223	1.21904e-05	2.13629e-05				357.253	274.35	1.30218
1629383_a_at	12.3294	11.9486	0.380784	0.00135199	1	0.000392268	0.000322017				5146.47	3952.59	1.30205
1634884_s_at	9.08557	8.70523	0.380341	4.6235e-08	4.93106e-06	1.51762e-10	3.41265e-09				543.286	417.383	1.30165
1624836_at	9.7187	9.33902	0.379678	9.48919e-05	0.115384	3.68238e-06	8.52757e-06				842.595	647.626	1.30105
1640549_at	12.247	11.8674	0.379572	0.00376481	1	0.00158467	0.000997867				4860.85	3736.36	1.30096
1628268_at	9.27677	8.89801	0.378763	0.000145717	0.232784	7.52981e-06	1.46581e-05				620.277	477.053	1.30023
1639064_s_at	9.57975	9.20104	0.378712	0.000150308	0.244494	7.91703e-06	1.52515e-05				765.231	588.557	1.30018
1622908_a_at	9.23782	8.85927	0.378548	0.00179475	1	0.0005936	0.000447022				603.754	464.414	1.30003
1639223_a_at	8.67885	8.30064	0.378205	0.00012446	0.18253	5.87668e-06	1.2102e-05				409.82	315.313	1.29972
1632267_a_at	11.4877	11.1096	0.378133	3.5914e-06	0.0013629	4.23062e-08	2.72902e-07				2871.75	2209.62	1.29966
1641714_at	10.8703	10.4926	0.3777	0.000895209	1	0.000205911	0.000195132				1871.91	1440.74	1.29927
1633534_s_at	9.45641	9.07927	0.377147	0.000997787	1	0.000246585	0.000224737				702.529	540.918	1.29877
1625587_at	9.68923	9.31209	0.377139	1.01206e-05	0.00506131	1.57718e-07	7.82441e-07				825.563	635.653	1.29876
1630630_at	10.2653	9.88816	0.377097	0.000158505	0.26773	8.68916e-06	1.63463e-05				1230.69	947.614	1.29873
1630589_at	11.0889	10.7125	0.376421	0.00057281	1	9.44843e-05	0.000105633				2178.16	1677.93	1.29812
1633540_at	10.603	10.2268	0.376146	0.0185552	1	0.0106628	0.00489212				1555.27	1198.33	1.29787
1628258_at	10.752	10.3759	0.376056	0.000716342	1	0.00014231	0.000145459				1724.51	1328.8	1.29779
1640798_a_at	10.5053	10.1295	0.375799	0.00165694	1	0.00052822	0.000406312				1453.48	1120.17	1.29756
1632479_at	10.9477	10.5723	0.375388	3.5687e-06	0.00135004	4.19046e-08	2.71198e-07				1975.09	1522.59	1.29719
1634980_s_at	9.4339	9.05869	0.375216	8.77504e-07	0.000212515	6.56822e-09	6.61244e-08				691.653	533.257	1.29703
1636603_a_at	11.201	10.8259	0.375127	0.00838103	1	0.00421442	0.00223749				2354.17	1815.16	1.29695
1625140_at	9.84775	9.47263	0.37512	1.87941e-06	0.000582627	1.80458e-08	1.41895e-07				921.44	710.469	1.29695
1633106_at	8.82198	8.44707	0.374909	7.73059e-09	5.96959e-07	1.83557e-11	5.70605e-10				452.564	348.997	1.29676
1624468_a_at	9.50224	9.12745	0.37479	7.83837e-08	9.2939e-06	2.86142e-10	5.78558e-09				725.203	559.289	1.29665
1641025_at	9.89471	9.51994	0.374771	6.33045e-05	0.0642715	2.03713e-06	5.351e-06				951.929	734.154	1.29663
1630159_at	10.1011	9.72637	0.374697	0.000888166	1	0.00020282	0.000192734				1098.31	847.092	1.29657
1639243_at	9.13434	8.75974	0.374605	0.00028443	0.738012	2.48013e-05	3.75045e-05				561.967	433.454	1.29648
1638302_a_at	9.25572	8.88128	0.374443	0.000450693	1	6.03496e-05	7.44268e-05				611.293	471.553	1.29634
1635917_at	9.28688	8.91256	0.374323	3.56532e-05	0.0279929	8.80447e-07	2.8744e-06				624.641	481.89	1.29623
1637828_a_at	11.0525	10.6782	0.374265	0.000361252	1	3.93259e-05	5.3278e-05				2123.9	1638.59	1.29618
1630131_at	9.53062	9.1565	0.374113	4.8059e-05	0.0423484	1.33621e-06	3.96429e-06				739.608	570.667	1.29604
1631196_at	10.1305	9.75667	0.373806	4.12249e-05	0.0342848	1.08001e-06	3.34872e-06				1120.93	865.069	1.29577
1638927_at	9.42394	9.05062	0.373321	3.60007e-06	0.00137812	4.27828e-08	2.73775e-07				686.894	530.285	1.29533
1624969_s_at	11.3494	10.9762	0.37329	0.000103002	0.132578	4.24154e-06	9.44957e-06				2609.3	2014.43	1.2953
1631834_at	9.55328	9.18011	0.373174	1.55497e-05	0.00883751	2.75991e-07	1.20595e-06				751.32	580.081	1.2952
1638021_at	9.89534	9.52226	0.373072	0.0214387	1	0.0126273	0.00562324				952.343	735.339	1.29511
1631355_at	9.88203	9.50898	0.373046	7.86099e-05	0.0878723	2.79492e-06	6.84113e-06				943.597	728.598	1.29508
1625857_at	10.4913	10.1183	0.373025	0.000322621	0.942463	3.21057e-05	4.54407e-05				1439.44	1111.48	1.29507
1635110_at	10.0198	9.64723	0.372617	2.77316e-06	0.000971068	3.01153e-08	2.1064e-07				1038.18	801.873	1.2947
1633801_s_at	9.09979	8.72723	0.37256	0.000204979	0.41452	1.36207e-05	2.33091e-05				548.668	423.797	1.29465
1635223_at	10.287	9.91461	0.372419	1.84843e-05	0.0112757	3.52609e-07	1.44816e-06				1249.41	965.153	1.29452
1637798_at	9.62321	9.2508	0.372415	0.000183428	0.345968	1.13102e-05	2.00985e-05				788.635	609.212	1.29452
1625947_at	10.1759	9.80353	0.372319	1.02488e-05	0.00515518	1.60658e-07	7.92127e-07				1156.74	893.63	1.29443
1627228_at	10.2876	9.91532	0.372279	0.000564141	1	9.19212e-05	0.000103592				1249.9	965.626	1.2944
1627915_a_at	12.8783	12.5062	0.372174	1.92875e-05	0.0120093	3.75715e-07	1.52189e-06				7529.47	5817.4	1.2943
1636348_s_at	11.584	11.2119	0.372127	0.00252232	1	0.000942135	0.000652335				3069.99	2372	1.29426
1633391_at	11.3691	10.997	0.372079	5.95476e-06	0.00261377	8.12892e-08	4.55919e-07				2645.08	2043.77	1.29422
1637056_s_at	9.63335	9.26214	0.371209	5.98133e-05	0.0591585	1.87341e-06	5.04205e-06				794.195	614.019	1.29344
1630287_at	10.8486	10.4775	0.371093	8.67577e-06	0.00409476	1.27483e-07	6.66817e-07				1843.96	1425.74	1.29333
1640351_s_at	10.274	9.90349	0.370492	5.21815e-06	0.00220919	6.86724e-08	3.9815e-07				1238.16	957.737	1.29279
1641265_at	8.42921	8.05996	0.36925	0.000102512	0.131442	4.20452e-06	9.40191e-06				344.703	266.864	1.29168
1625080_at	10.249	9.88011	0.36888	1.14031e-05	0.00594556	1.85399e-07	8.83341e-07				1216.9	942.345	1.29135
1634462_at	8.58673	8.21807	0.368666	7.98628e-09	6.37354e-07	1.95994e-11	5.89474e-10				384.472	297.773	1.29116
1625583_at	10.1505	9.78199	0.368517	0.00999399	1	0.00519536	0.00267505				1136.6	880.386	1.29103
1628696_at	8.95568	8.58726	0.368423	0.000153091	0.254084	8.23745e-06	1.56804e-05				496.51	384.611	1.29094
1628320_at	10.034	9.66565	0.368355	9.57599e-05	0.117325	3.74553e-06	8.63227e-06				1048.42	812.176	1.29088
1632952_at	9.94198	9.57377	0.368214	2.28271e-06	0.000756006	2.34311e-08	1.72574e-07				983.636	762.063	1.29075
1627505_at	9.7056	9.33784	0.367763	1.66574e-07	2.5037e-05	7.71603e-10	1.2377e-08				834.981	647.096	1.29035
1637574_at	9.03989	8.67247	0.367414	1.09397e-07	1.47079e-05	4.53053e-10	8.07472e-09				526.354	408.014	1.29004
1627102_at	12.3563	11.989	0.367309	1.25812e-05	0.00679095	2.11886e-07	9.74794e-07				5243.53	4064.92	1.28994
1635442_a_at	10.1493	9.78198	0.367286	0.000271927	0.677639	2.26779e-05	3.49743e-05				1135.62	880.379	1.28992
1639346_at	10.6114	10.2447	0.36668	4.52561e-06	0.00187191	5.81701e-08	3.45587e-07				1564.36	1213.27	1.28938
1625042_at	8.90242	8.53575	0.366677	3.81116e-05	0.0308754	9.71872e-07	3.09176e-06				478.516	371.121	1.28938
1625923_s_at	9.58007	9.21356	0.366516	0.000624839	1	0.00011175	0.000119875				765.401	593.686	1.28924
1636856_at	9.58524	9.21879	0.366458	0.000297165	0.810937	2.7403e-05	4.03514e-05				768.15	595.842	1.28918
1624372_at	10.2589	9.89289	0.366053	0.000168461	0.297409	9.6794e-06	1.77647e-05				1225.32	950.732	1.28882
1638205_s_at	10.3057	9.94021	0.365458	0.000212134	0.441562	1.45418e-05	2.45192e-05				1265.65	982.43	1.28829
1626429_at	9.23424	8.8692	0.365041	0.00296018	1	0.00116407	0.000776927				602.26	467.623	1.28792
1639380_a_at	10.5989	10.234	0.364879	0.00687426	1	0.00332073	0.00183467				1550.92	1204.34	1.28777
1635807_at	11.4467	11.0819	0.364744	3.04532e-06	0.00109615	3.4005e-08	2.31127e-07				2791.24	2167.7	1.28765
1637880_at	8.9296	8.56486	0.364741	6.00427e-05	0.0594459	1.88257e-06	5.05999e-06				487.615	378.685	1.28765
1633723_at	9.81733	9.45261	0.36472	0.00015143	0.247777	8.02569e-06	1.53756e-05				902.216	700.679	1.28763
1635310_s_at	8.95365	8.58924	0.364413	0.000614768	1	0.000108097	0.000116685				495.812	385.139	1.28736
1635367_at	8.28305	7.91886	0.364193	0.000182557	0.342564	1.11949e-05	1.99378e-05				311.492	241.999	1.28716
1639476_at	10.3758	10.0118	0.363958	0.00140527	1	0.000415099	0.000335833				1328.69	1032.44	1.28695
1627456_s_at	9.52905	9.16521	0.363842	0.00104775	1	0.000266485	0.000237741				738.804	574.119	1.28685
1631456_at	10.2852	9.92139	0.363761	0.000163679	0.281419	9.14352e-06	1.70412e-05				1247.78	969.697	1.28678
1636132_at	8.72695	8.36339	0.363562	5.33477e-05	0.0492309	1.55553e-06	4.45267e-06				423.715	329.33	1.2866
1640397_at	9.18681	8.82331	0.363506	0.00224878	1	0.000806919	0.000574925				582.782	452.981	1.28655
1639286_s_at	11.1886	10.8253	0.363345	8.82918e-05	0.104283	3.32409e-06	7.83356e-06				2334.03	1814.38	1.2864
1637072_at	9.55971	9.19684	0.362872	0.000355186	1	3.83188e-05	5.2148e-05				754.675	586.846	1.28598
1628991_at	11.2732	10.9105	0.362742	1.9852e-05	0.0125706	3.93411e-07	1.5646e-06				2475.03	1924.8	1.28587
1624586_a_at	11.149	10.7865	0.36253	0.00278253	1	0.00107433	0.0007259				2270.83	1766.25	1.28568
1634579_at	9.54365	9.18144	0.362214	0.000123326	0.179615	5.78078e-06	1.197e-05				746.32	580.615	1.2854
1641153_a_at	10.1678	9.80576	0.362065	0.000258165	0.618363	2.06149e-05	3.25468e-05				1150.32	895.01	1.28526
1641429_at	10.1642	9.80223	0.361975	2.80687e-05	0.0200587	6.29432e-07	2.23373e-06				1147.44	892.82	1.28518
1624380_at	9.90063	9.53869	0.361946	5.85802e-05	0.0570598	1.80603e-06	4.92126e-06				955.845	743.757	1.28516
1628187_s_at	12.126	11.7642	0.361793	1.39154e-05	0.00769903	2.40317e-07	1.08077e-06				4469.84	3478.42	1.28502
1640842_at	10.1084	9.74684	0.361535	1.21778e-05	0.00650262	2.02852e-07	9.44063e-07				1103.89	859.195	1.28479
1628016_s_at	9.01759	8.65614	0.361448	0.000462264	1	6.32461e-05	7.72075e-05				518.28	403.42	1.28471
1630643_at	10.3353	9.97395	0.361347	4.38831e-05	0.0374456	1.18039e-06	3.59122e-06				1291.92	1005.68	1.28462
1626566_at	11.7203	11.359	0.361314	0.000370594	1	4.0977e-05	5.5235e-05				3374.07	2626.56	1.2846
1638804_a_at	9.53073	9.16948	0.361254	0.000236054	0.529865	1.75603e-05	2.85292e-05				739.666	575.821	1.28454
1634848_at	11.3821	11.021	0.361158	0.00032007	0.930387	3.16738e-05	4.50167e-05				2669.1	2078	1.28446
1635989_at	11.0024	10.6414	0.360975	6.62973e-05	0.0683127	2.16632e-06	5.63329e-06				2051.36	1597.26	1.28429
1633067_at	9.27439	8.91384	0.360545	0.000199246	0.392689	1.28784e-05	2.22765e-05				619.254	482.319	1.28391
1625486_a_at	10.19	9.82948	0.360522	8.8666e-07	0.000215606	6.66396e-09	6.68087e-08				1168.14	909.845	1.28389
1639876_a_at	8.54276	8.18268	0.360081	0.0777644	1	0.0546364	0.0194958				372.93	290.557	1.2835
1638366_at	8.59076	8.23084	0.359919	4.50473e-05	0.0387477	1.22175e-06	3.6921e-06				385.547	300.421	1.28335
1629919_at	9.42977	9.06993	0.359837	0.0038768	1	0.0016429	0.00102808				689.672	537.429	1.28328
1638812_at	8.83425	8.47445	0.359801	0.00945558	1	0.00486238	0.00252631				456.43	355.683	1.28325
1636956_at	10.6651	10.3056	0.359515	0.00951123	1	0.0048972	0.00253946				1623.71	1265.56	1.28299
1623551_at	10.2249	9.86555	0.359385	0.000394046	1	4.65046e-05	6.06717e-05				1196.77	932.88	1.28288
1631660_at	11.8425	11.4841	0.358389	0.000617616	1	0.000108904	0.000117504				3672.42	2864.62	1.28199
1629606_at	9.49526	9.13714	0.358128	1.81254e-09	1.13973e-07	3.50313e-12	1.33791e-10				721.705	563.057	1.28176
1629375_at	11.2205	10.8624	0.358082	0.000133386	0.203911	6.57969e-06	1.31599e-05				2386.2	1861.72	1.28172
1634975_at	10.5365	10.1789	0.357643	4.86774e-05	0.0433829	1.36932e-06	4.02284e-06				1485.26	1159.15	1.28133
1632146_a_at	10.9497	10.5922	0.357532	0.000648775	1	0.000119844	0.000127135				1977.88	1543.74	1.28123
1638713_at	8.7175	8.36029	0.357208	0.00148341	1	0.000449509	0.000358726				420.948	328.623	1.28094
1637648_at	10.0827	9.72608	0.356638	6.28475e-07	0.000134235	4.1451e-09	4.72677e-08				1084.43	846.917	1.28044
1628946_at	10.865	10.5084	0.356565	0.00118262	1	0.000321096	0.00027592				1865.06	1456.65	1.28037
1633779_s_at	10.0895	9.73332	0.356205	5.10121e-05	0.045993	1.45221e-06	4.23021e-06				1089.56	851.183	1.28005
1627206_at	11.694	11.3383	0.355678	9.83186e-05	0.121906	3.89378e-06	8.90569e-06				3313.2	2589.27	1.27959
1637246_a_at	9.04851	8.69306	0.355451	0.00171298	1	0.000554284	0.000422579				529.508	413.877	1.27939
1638361_at	10.7165	10.3613	0.355253	0.558768	1	0.507653	0.128521				1682.64	1315.38	1.27921
1636420_at	11.4588	11.1037	0.35515	0.309769	1	0.259804	0.0730783				2814.78	2200.56	1.27912
1626287_at	9.34986	8.99495	0.354902	7.53198e-07	0.000170435	5.26472e-09	5.65783e-08				652.51	510.212	1.2789
1629358_s_at	10.4696	10.1151	0.354418	5.23854e-05	0.0476401	1.5046e-06	4.34415e-06				1417.93	1109.08	1.27847
1627652_at	8.94257	8.58816	0.354413	6.16094e-05	0.0619738	1.96368e-06	5.20925e-06				492.019	384.851	1.27847
1628474_at	13.3206	12.9662	0.354359	3.05622e-06	0.00110306	3.42205e-08	2.31937e-07				10230.4	8002.38	1.27842
1635042_s_at	8.66783	8.31348	0.354346	0.004056	1	0.00173946	0.00107646				406.702	318.132	1.27841
1634887_at	11.218	10.8638	0.354211	6.85297e-06	0.00306801	9.54429e-08	5.25502e-07				2382.06	1863.48	1.27829
1630252_at	10.6397	10.2855	0.354198	0.000373549	1	4.17231e-05	5.5834e-05				1595.35	1248.05	1.27828
1632179_at	9.72477	9.37127	0.353496	2.45731e-05	0.0169264	5.30692e-07	1.94946e-06				846.148	662.268	1.27765
1628896_a_at	8.52226	8.16883	0.353429	1.23151e-06	0.000329764	1.02003e-08	9.26145e-08				367.668	287.782	1.27759
1635382_at	10.5118	10.1584	0.353369	0.000286603	0.755934	2.54472e-05	3.8157e-05				1460.01	1142.83	1.27754
1626371_at	10.0782	9.72484	0.353328	5.14733e-06	0.0021742	6.75826e-08	3.92778e-07				1081.01	846.189	1.2775
1626401_at	11.2154	10.8622	0.353208	1.50657e-05	0.0084957	2.65283e-07	1.16904e-06				2377.84	1861.47	1.2774
1628595_at	9.6737	9.32049	0.353203	0.000355262	1	3.83401e-05	5.2148e-05				816.718	639.363	1.27739
1623288_at	10.7332	10.3802	0.353003	0.000190249	0.365329	1.19584e-05	2.10175e-05				1702.22	1332.76	1.27722
1637881_at	10.7214	10.3685	0.352874	3.22006e-05	0.024238	7.61506e-07	2.58793e-06				1688.38	1322.04	1.2771
1625955_a_at	9.38038	9.02781	0.352573	0.00192671	1	0.000654809	0.000485077				666.464	521.965	1.27684
1633599_a_at	12.5118	12.1592	0.352569	0.00414214	1	0.00178428	0.00109883				5840.12	4573.91	1.27683
1630408_s_at	10.0613	9.70889	0.352374	0.000234844	0.524949	1.7391e-05	2.83498e-05				1068.42	836.887	1.27666
1628984_s_at	11.2236	10.8713	0.352303	0.000773545	1	0.000162438	0.000161504				2391.27	1873.16	1.2766
1636488_at	11.8817	11.5296	0.352053	1.93187e-05	0.0120473	3.76915e-07	1.52408e-06				3773.53	2956.45	1.27638
1632360_s_at	8.79514	8.4431	0.352045	7.74615e-10	4.40772e-08	1.35467e-12	5.71835e-11				444.223	348.037	1.27637
1631252_a_at	10.1445	9.79264	0.351844	6.06262e-05	0.060417	1.91375e-06	5.12129e-06				1131.86	886.908	1.27619
1636238_at	8.67683	8.32524	0.351597	0.000121876	0.175437	5.64269e-06	1.17752e-05				409.249	320.735	1.27597
1624830_at	12.3954	12.0442	0.351223	0.0554879	1	0.0374515	0.0140558				5387.67	4223.5	1.27564
1624236_at	9.95714	9.60649	0.350656	6.9552e-06	0.0031273	9.72934e-08	5.34468e-07				994.029	779.545	1.27514
1634767_at	10.6969	10.3468	0.350071	1.24876e-05	0.00671629	2.09543e-07	9.67715e-07				1659.89	1302.26	1.27462
1628777_at	10.5345	10.1845	0.350045	0.000578439	1	9.60616e-05	0.000106809				1483.21	1163.67	1.2746
1625742_at	9.99803	9.64814	0.349889	1.20456e-07	1.70308e-05	5.24718e-10	8.89098e-09				1022.6	802.378	1.27446
1623191_at	10.4118	10.0624	0.349452	0.000340479	1	3.51644e-05	4.88452e-05				1362.31	1069.25	1.27408
1640313_s_at	10.8989	10.5494	0.349427	0.000152414	0.250883	8.12945e-06	1.55486e-05				1909.36	1498.65	1.27405
1641372_at	9.55544	9.20603	0.349411	0.000354728	1	3.81981e-05	5.20431e-05				752.444	590.596	1.27404
1632067_at	10.4675	10.1182	0.34925	0.00301501	1	0.00119248	0.000791073				1415.88	1111.45	1.2739
1637162_at	9.52985	9.18066	0.349188	7.91243e-05	0.0888148	2.82535e-06	6.89457e-06				739.214	580.302	1.27384
1635469_at	9.78015	9.43103	0.349119	9.4527e-06	0.00462651	1.44119e-07	7.28495e-07				879.264	690.278	1.27378
[truncated: 10,285 more rows]

## Sheet: BY_ExC
GENE	construct	ON	OFF	ratio	Exp_Con_p_value	q-value	Exp_Cons_FDR	Exp_Cons_Bonferoni
[truncated: 54,330 more rows]
